# Supplementary material for: Upper Airway Epithelial Tissue Transcriptome Analysis Reveals Immune Signatures Associated with COVID‐19 Severity in Ghanaians
Source: Hindawi journal article supplement (doi:10.1155/2024/6668017), 2024-01-01

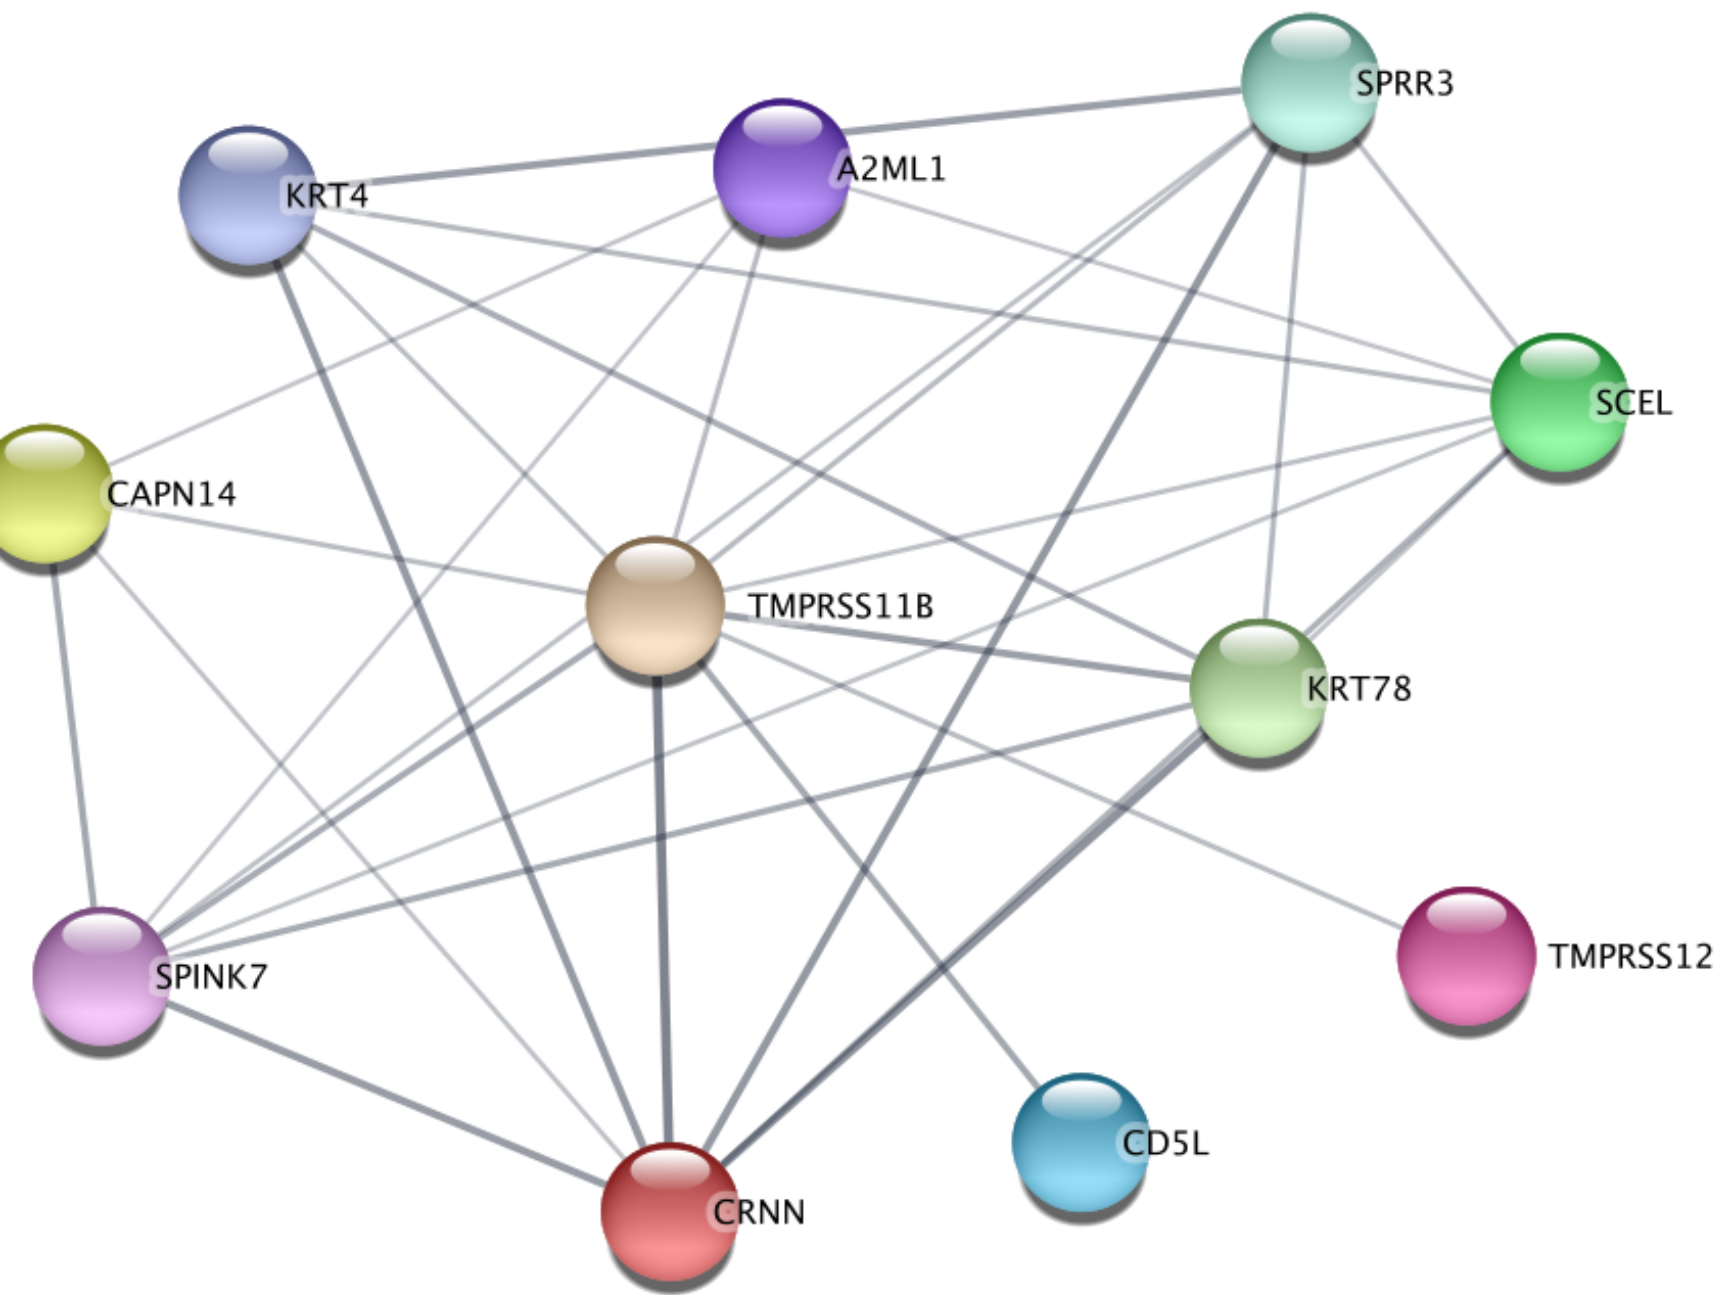

Supplement: f8 [file 6668017.f8.pdf]
