# Supplementary material for: Upper Airway Epithelial Tissue Transcriptome Analysis Reveals Immune Signatures Associated with COVID-19 Severity in Ghanaians
Source: J Immunol Res. 2024 Feb 12;2024:6668017. doi: 10.1155/2024/6668017 (PMC10876312; doi:10.1155/2024/6668017)
Supplement: Supplementary 1 — Processed data. [file 6668017.f1.txt]

Sample_ID	Gender	Age	Clinical Record	Population	Country	Group	Clinical_Condition	Tissue_type	Sample_type	Sequencing_platform	Total_Reads	Reads_mapped (hg19)	frac_mapped	Bootstrap
L-201	Female	70	NA	Ghanaian	Ghana	SARS-CoV-2 Uninfected	Uninfected Control	Upper airway epithelial tissue	Nasopharyngeal swab	Illumina Novaseq 6000	16691683	12596288	0.75	100
L-119	Male	43	NA	Ghanaian	Ghana	SARS-CoV-2 Infected	Mild	Upper airway epithelial tissue	Nasopharyngeal swab	Illumina Novaseq 6000	8384763	6492800	0.77	100
L-118	Male	24	NA	Ghanaian	Ghana	SARS-CoV-2 Infected	Mild	Upper airway epithelial tissue	Nasopharyngeal swab	Illumina Novaseq 6000	10492863	9171800	0.87	100
L-097	Male	67	NA	Ghanaian	Ghana	SARS-CoV-2 Uninfected	Uninfected Control	Upper airway epithelial tissue	Nasopharyngeal swab	Illumina Novaseq 6000	8068442	7086281	0.88	100
L-096	Female	35	NA	Ghanaian	Ghana	SARS-CoV-2 Uninfected	Uninfected Control	Upper airway epithelial tissue	Nasopharyngeal swab	Illumina Novaseq 6000	11032356	7949080	0.72	100
L-095	Female	28	NA	Ghanaian	Ghana	SARS-CoV-2 Infected	Mild	Upper airway epithelial tissue	Nasopharyngeal swab	Illumina Novaseq 6000	69558238	62748244	0.9	100
L-094	Female	94	NA	Ghanaian	Ghana	SARS-CoV-2 Uninfected	Uninfected Control	Upper airway epithelial tissue	Nasopharyngeal swab	Illumina Novaseq 6000	20463138	15801353	0.77	100
L-093	Female	46.5	NA	Ghanaian	Ghana	SARS-CoV-2 Infected	Mild	Upper airway epithelial tissue	Nasopharyngeal swab	Illumina Novaseq 6000	7296082	6296946	0.86	100
L-091	Female	77	NA	Ghanaian	Ghana	SARS-CoV-2 Infected	Severe	Upper airway epithelial tissue	Nasopharyngeal swab	Illumina Novaseq 6000	37174894	25482444	0.69	100
L-089	Male	51	NA	Ghanaian	Ghana	SARS-CoV-2 Infected	Mild	Upper airway epithelial tissue	Nasopharyngeal swab	Illumina Novaseq 6000	20649875	16853054	0.82	100
L-088	Female	46	NA	Ghanaian	Ghana	SARS-CoV-2 Infected	Mild	Upper airway epithelial tissue	Nasopharyngeal swab	Illumina Novaseq 6000	12143795	9646602	0.79	100
L-086	Female	52	NA	Ghanaian	Ghana	SARS-CoV-2 Infected	Mild	Upper airway epithelial tissue	Nasopharyngeal swab	Illumina Novaseq 6000	11257904	7981893	0.71	100
L-082	Male	47	HIV infection	Ghanaian	Ghana	SARS-CoV-2 Infected	Mild	Upper airway epithelial tissue	Nasopharyngeal swab	Illumina Novaseq 6000	12061855	10325440	0.86	100
L-080	Female	35	NA	Ghanaian	Ghana	SARS-CoV-2 Infected	Mild	Upper airway epithelial tissue	Nasopharyngeal swab	Illumina Novaseq 6000	10397748	8674806	0.83	100
L-075	Male	56	NA	Ghanaian	Ghana	SARS-CoV-2 Infected	Mild	Upper airway epithelial tissue	Nasopharyngeal swab	Illumina Novaseq 6000	10525020	8590517	0.82	100
L-074	Male	33	NA	Ghanaian	Ghana	SARS-CoV-2 Uninfected	Uninfected Control	Upper airway epithelial tissue	Nasopharyngeal swab	Illumina Novaseq 6000	33295948	25710830	0.77	100
L-073	Male	22	NA	Ghanaian	Ghana	SARS-CoV-2 Uninfected	Uninfected Control	Upper airway epithelial tissue	Nasopharyngeal swab	Illumina Novaseq 6000	28384714	22909849	0.81	100
L-072	Male	38	NA	Ghanaian	Ghana	SARS-CoV-2 Uninfected	Uninfected Control	Upper airway epithelial tissue	Nasopharyngeal swab	Illumina Novaseq 6000	8709387	7131001	0.82	100
L-071	Male	67	NA	Ghanaian	Ghana	SARS-CoV-2 Uninfected	Uninfected Control	Upper airway epithelial tissue	Nasopharyngeal swab	Illumina Novaseq 6000	8926765	7538578	0.84	100
L-070	Female	65	NA	Ghanaian	Ghana	SARS-CoV-2 Uninfected	Uninfected Control	Upper airway epithelial tissue	Nasopharyngeal swab	Illumina Novaseq 6000	8592496	7600396	0.88	100
L-069	Male	87	NA	Ghanaian	Ghana	SARS-CoV-2 Uninfected	Uninfected Control	Upper airway epithelial tissue	Nasopharyngeal swab	Illumina Novaseq 6000	11170621	9225167	0.83	100
L-068	Female	25	NA	Ghanaian	Ghana	SARS-CoV-2 Uninfected	Uninfected Control	Upper airway epithelial tissue	Nasopharyngeal swab	Illumina Novaseq 6000	30404884	26306213	0.87	100
L-066	Female	55	NA	Ghanaian	Ghana	SARS-CoV-2 Uninfected	Uninfected Control	Upper airway epithelial tissue	Nasopharyngeal swab	Illumina Novaseq 6000	6533507	5343890	0.82	100
L-063	Male	54	NA	Ghanaian	Ghana	SARS-CoV-2 Uninfected	Uninfected Control	Upper airway epithelial tissue	Nasopharyngeal swab	Illumina Novaseq 6000	6771875	5856412	0.86	100
L-062	Female	24	NA	Ghanaian	Ghana	SARS-CoV-2 Uninfected	Uninfected Control	Upper airway epithelial tissue	Nasopharyngeal swab	Illumina Novaseq 6000	7014871	3198070	0.46	100
L-061	Male	64	NA	Ghanaian	Ghana	SARS-CoV-2 Uninfected	Uninfected Control	Upper airway epithelial tissue	Nasopharyngeal swab	Illumina Novaseq 6000	6784577	5459571	0.8	100
L-060	Female	35	NA	Ghanaian	Ghana	SARS-CoV-2 Uninfected	Uninfected Control	Upper airway epithelial tissue	Nasopharyngeal swab	Illumina Novaseq 6000	34099098	27497243	0.81	100
L-059	Male	78	NA	Ghanaian	Ghana	SARS-CoV-2 Uninfected	Uninfected Control	Upper airway epithelial tissue	Nasopharyngeal swab	Illumina Novaseq 6000	6677756	5322623	0.8	100
L-057	Male	31	NA	Ghanaian	Ghana	SARS-CoV-2 Uninfected	Uninfected Control	Upper airway epithelial tissue	Nasopharyngeal swab	Illumina Novaseq 6000	9493882	7796847	0.82	100
L-056	Female	30	NA	Ghanaian	Ghana	SARS-CoV-2 Uninfected	Uninfected Control	Upper airway epithelial tissue	Nasopharyngeal swab	Illumina Novaseq 6000	11136650	9156999	0.82	100
L-055	Female	19	NA	Ghanaian	Ghana	SARS-CoV-2 Uninfected	Uninfected Control	Upper airway epithelial tissue	Nasopharyngeal swab	Illumina Novaseq 6000	12568256	10416096	0.83	100
L-053	Female	34	NA	Ghanaian	Ghana	SARS-CoV-2 Infected	Mild	Upper airway epithelial tissue	Nasopharyngeal swab	Illumina Novaseq 6000	26092715	21686234	0.83	100
L-049	Male	53	NA	Ghanaian	Ghana	SARS-CoV-2 Infected	Mild	Upper airway epithelial tissue	Nasopharyngeal swab	Illumina Novaseq 6000	6245897	4947342	0.79	100
L-048	Female	60	Hyperglycemia/Diabetes	Ghanaian	Ghana	SARS-CoV-2 Infected	Severe	Upper airway epithelial tissue	Nasopharyngeal swab	Illumina Novaseq 6000	32989166	28427692	0.86	100
L-046	Male	46	NA	Ghanaian	Ghana	SARS-CoV-2 Infected	Mild	Upper airway epithelial tissue	Nasopharyngeal swab	Illumina Novaseq 6000	36078021	29059664	0.81	100
L-044	Male	36	NA	Ghanaian	Ghana	SARS-CoV-2 Infected	Mild	Upper airway epithelial tissue	Nasopharyngeal swab	Illumina Novaseq 6000	9912029	8324108	0.84	100
L-043	Female	53	NA	Ghanaian	Ghana	SARS-CoV-2 Infected	Mild	Upper airway epithelial tissue	Nasopharyngeal swab	Illumina Novaseq 6000	17457529	14919930	0.85	100
L-042	Male	46.5	NA	Ghanaian	Ghana	SARS-CoV-2 Infected	Mild	Upper airway epithelial tissue	Nasopharyngeal swab	Illumina Novaseq 6000	16321206	10546909	0.65	100
L-041	Male	40	NA	Ghanaian	Ghana	SARS-CoV-2 Infected	Mild	Upper airway epithelial tissue	Nasopharyngeal swab	Illumina Novaseq 6000	12242783	10179428	0.83	100
L-040	Female	30	NA	Ghanaian	Ghana	SARS-CoV-2 Infected	Mild	Upper airway epithelial tissue	Nasopharyngeal swab	Illumina Novaseq 6000	8831346	7927353	0.9	100
L-039	Female	44	NA	Ghanaian	Ghana	SARS-CoV-2 Infected	Mild	Upper airway epithelial tissue	Nasopharyngeal swab	Illumina Novaseq 6000	7991522	6652812	0.83	100
L-038	Female	44	NA	Ghanaian	Ghana	SARS-CoV-2 Infected	Mild	Upper airway epithelial tissue	Nasopharyngeal swab	Illumina Novaseq 6000	7216979	4420259	0.61	100
L-037	Male	40	NA	Ghanaian	Ghana	SARS-CoV-2 Infected	Mild	Upper airway epithelial tissue	Nasopharyngeal swab	Illumina Novaseq 6000	8284809	7377483	0.89	100
L-036	Female	36	NA	Ghanaian	Ghana	SARS-CoV-2 Infected	Mild	Upper airway epithelial tissue	Nasopharyngeal swab	Illumina Novaseq 6000	12067244	9912725	0.82	100
L-035	Female	70	NA	Ghanaian	Ghana	SARS-CoV-2 Infected	Severe	Upper airway epithelial tissue	Nasopharyngeal swab	Illumina Novaseq 6000	9987220	8560705	0.86	100
L-034	Female	46.5	NA	Ghanaian	Ghana	SARS-CoV-2 Infected	Mild	Upper airway epithelial tissue	Nasopharyngeal swab	Illumina Novaseq 6000	12495549	10663941	0.85	100
L-033	Male	46.5	NA	Ghanaian	Ghana	SARS-CoV-2 Infected	Mild	Upper airway epithelial tissue	Nasopharyngeal swab	Illumina Novaseq 6000	12269582	7693821	0.63	100
L-028	Male	17	NA	Ghanaian	Ghana	SARS-CoV-2 Infected	Mild	Upper airway epithelial tissue	Nasopharyngeal swab	Illumina Novaseq 6000	10712584	8614675	0.8	100
L-025	Female	30	NA	Ghanaian	Ghana	SARS-CoV-2 Infected	Mild	Upper airway epithelial tissue	Nasopharyngeal swab	Illumina Novaseq 6000	18787800	12237862	0.65	100
L-024	Male	30	NA	Ghanaian	Ghana	SARS-CoV-2 Infected	Mild	Upper airway epithelial tissue	Nasopharyngeal swab	Illumina Novaseq 6000	9007827	7222758	0.8	100
L-023	Male	46.5	NA	Ghanaian	Ghana	SARS-CoV-2 Infected	Mild	Upper airway epithelial tissue	Nasopharyngeal swab	Illumina Novaseq 6000	8922691	6980160	0.78	100
L-022	Female	53	NA	Ghanaian	Ghana	SARS-CoV-2 Uninfected	Uninfected Control	Upper airway epithelial tissue	Nasopharyngeal swab	Illumina Novaseq 6000	6947797	4154692	0.6	100
L-021	Female	34	NA	Ghanaian	Ghana	SARS-CoV-2 Infected	Mild	Upper airway epithelial tissue	Nasopharyngeal swab	Illumina Novaseq 6000	12929371	10307516	0.8	100
L-020	Male	62	Stroke	Ghanaian	Ghana	SARS-CoV-2 Infected	Mild	Upper airway epithelial tissue	Nasopharyngeal swab	Illumina Novaseq 6000	18757313	12510548	0.67	100
L-019	Male	57	NA	Ghanaian	Ghana	SARS-CoV-2 Infected	Mild	Upper airway epithelial tissue	Nasopharyngeal swab	Illumina Novaseq 6000	8344081	6579969	0.79	100
L-017	Female	46.5	NA	Ghanaian	Ghana	SARS-CoV-2 Infected	Mild	Upper airway epithelial tissue	Nasopharyngeal swab	Illumina Novaseq 6000	31505891	22802627	0.72	100
L-015	Female	18	NA	Ghanaian	Ghana	SARS-CoV-2 Infected	Mild	Upper airway epithelial tissue	Nasopharyngeal swab	Illumina Novaseq 6000	14434787	11612506	0.8	100
L-014	Male	82	Hypotension	Ghanaian	Ghana	SARS-CoV-2 Infected	Severe	Upper airway epithelial tissue	Nasopharyngeal swab	Illumina Novaseq 6000	31903561	25852540	0.81	100
L-013	Male	46.5	NA	Ghanaian	Ghana	SARS-CoV-2 Infected	Mild	Upper airway epithelial tissue	Nasopharyngeal swab	Illumina Novaseq 6000	11775167	10469466	0.89	100
L-012	Female	89	NA	Ghanaian	Ghana	SARS-CoV-2 Infected	Severe	Upper airway epithelial tissue	Nasopharyngeal swab	Illumina Novaseq 6000	9238092	7293498	0.79	100
L-010	Female	61	NA	Ghanaian	Ghana	SARS-CoV-2 Infected	Mild	Upper airway epithelial tissue	Nasopharyngeal swab	Illumina Novaseq 6000	7373495	5507567	0.75	100
L-008	Female	46.5	NA	Ghanaian	Ghana	SARS-CoV-2 Uninfected	Uninfected Control	Upper airway epithelial tissue	Nasopharyngeal swab	Illumina Novaseq 6000	12462748	9174051	0.74	100
L-003	Female	85	NA	Ghanaian	Ghana	SARS-CoV-2 Infected	Mild	Upper airway epithelial tissue	Nasopharyngeal swab	Illumina Novaseq 6000	9098193	6448570	0.71	100
L-001	Male	82	NA	Ghanaian	Ghana	SARS-CoV-2 Infected	Severe	Upper airway epithelial tissue	Nasopharyngeal swab	Illumina Novaseq 6000	7106672	5839723	0.82	100
