# Supplementary material for: Upper Airway Epithelial Tissue Transcriptome Analysis Reveals Immune Signatures Associated with COVID-19 Severity in Ghanaians
Source: J Immunol Res. 2024 Feb 12;2024:6668017. doi: 10.1155/2024/6668017 (PMC10876312; doi:10.1155/2024/6668017)
Supplement: Supplementary 2 — Up sars-CoV-2-infected vs uninfected control Ghanaians. [file 6668017.f2.txt]

target_id	ext_gene	pval	qval	b	se_b	mean_obs	var_obs	tech_var	sigma_sq	smooth_sigma_sq	final_sigma_sq	bflip
ENSG00000138642	HERC6	1.16229693774035e-38	1.84758721223207e-34	-1.84951570587876	0.142227554456475	4.70229862412612	1.31590717420495	0.0080276541628658	0.30614490886343	0.157524709352951	0.30614490886343	1.84951570587876
ENSG00000155363	MOV10	2.48041454122454e-36	1.97143347736526e-32	-1.18907258814941	0.094466125816467	7.04932539648498	0.550718300228396	0.00956110186632751	0.129035626688683	0.121480467695239	0.129035626688683	1.18907258814941
ENSG00000160932	LY6E	1.98569976581802e-35	1.05215611591478e-31	-1.47387407905867	0.118650437479569	8.61573028507594	0.82597891394443	0.00128648413756119	0.217358469176037	0.155154852089603	0.217358469176037	1.47387407905867
ENSG00000130303	BST2	1.77611150331029e-34	6.51182212353766e-31	-1.88207904891524	0.153695748269525	7.71378706414529	1.37678907215754	0.00086565998490915	0.366014711516962	0.130619089567178	0.366014711516962	1.88207904891524
ENSG00000137959	IFI44L	2.04825809119831e-34	6.51182212353766e-31	-3.03837663625677	0.248356872317617	5.78818825019307	3.59496195977702	0.0129827573998914	0.944989944413265	0.121468056793352	0.944989944413265	3.03837663625677
ENSG00000284889	PSME2	3.10510282951596e-34	7.05124493971224e-31	-1.07216208802127	0.0878815461330847	6.34665899718726	0.439713074994631	0.00136139463191374	0.110619943598756	0.118587471755574	0.118587471755574	1.07216208802127
ENSG00000100911	PSME2	3.10510282951576e-34	7.05124493971224e-31	-1.07216208802127	0.0878815461330847	6.34665899718726	0.439713074994631	0.00136139463191374	0.110619943598756	0.118587471755574	0.118587471755574	1.07216208802127
ENSG00000089127	OAS1	5.18804095269e-31	1.0308637372995e-27	-2.31445330550081	0.199861717579794	7.37565780328949	2.21219086874821	0.00230148887504127	0.618081671066047	0.125137715742107	0.618081671066047	2.31445330550081
ENSG00000187608	ISG15	1.64689709135549e-30	2.90878624046521e-27	-3.81514315886366	0.332305485070017	7.98921854212201	5.83809959931688	0.00289217405196736	1.71215389154595	0.136473239539378	1.71215389154595	3.81514315886366
ENSG00000111335	OAS2	3.86435331060523e-30	6.14277602253807e-27	-1.76680634174511	0.154889828598788	7.20302426218215	1.29582419693611	0.00212988302143551	0.370473306518778	0.123011315713661	0.370473306518778	1.76680634174511
ENSG00000156587	UBE2L6	1.89020397283852e-29	2.73151657747646e-26	-1.68991255318331	0.149975795608213	6.67864436892301	1.12993123292694	0.00111126568218087	0.348224553918807	0.119133234776737	0.348224553918807	1.68991255318331
ENSG00000126709	IFI6	5.48920235474092e-29	7.27136338591347e-26	-2.72328716387109	0.243724522946476	8.65957016747828	2.99586543527537	0.000773771366088407	0.921796015504836	0.156777307827267	0.921796015504836	2.72328716387109
ENSG00000149131	SERPING1	2.36548270754583e-28	2.89243947070373e-25	-2.35803130635953	0.213528555066474	7.37551351277549	2.33980020496314	0.00548096901356685	0.702648539543569	0.125135754236302	0.702648539543569	2.35803130635953
ENSG00000068079	IFI35	2.64020620611855e-28	2.99776556089003e-25	-1.73303378147152	0.157073138676802	5.84638225773932	1.22478632270109	0.00300380484949181	0.380177766347199	0.120833973879982	0.380177766347199	1.73303378147152
ENSG00000168062	BATF2	3.17667239281322e-28	3.36642562374393e-25	-2.07654204316556	0.188491266296998	5.47580388743043	1.8209655449518	0.0120450431415759	0.539756910785842	0.12696977315159	0.539756910785842	2.07654204316556
ENSG00000136514	RTP4	2.0060947345943e-27	1.99305511881943e-24	-1.66233156330038	0.153217923820556	5.98645544896666	1.13063901935227	0.0065497618936356	0.358052968079061	0.119701918117012	0.358052968079061	1.66233156330038
ENSG00000185745	IFIT1	3.86205514334548e-27	3.61124873874233e-24	-2.95639432065237	0.274008558766787	7.17706336219611	3.66456749800359	0.00373284462300149	1.16234898122322	0.122729126846757	1.16234898122322	2.95639432065237
ENSG00000137965	IFI44	8.84657886034031e-27	7.8125120868872e-24	-1.8040417009867	0.168397721468061	6.36438698769423	1.31120845225906	0.00650566060387411	0.433920585408107	0.11858008964977	0.433920585408107	1.8040417009867
ENSG00000100342	APOL1	2.72222327438585e-26	2.27749795629671e-23	-1.42999892503859	0.134798079378433	7.59064028333494	0.860013627150279	0.00108899836778973	0.281118259317961	0.128413882684863	0.281118259317961	1.42999892503859
ENSG00000275214	IFI27	3.40967974756097e-26	2.71001346336146e-23	-1.75043061735363	0.165331653380869	8.73627439903887	1.27299518909677	0.00438659388083853	0.420147709096533	0.159725881727084	0.420147709096533	1.75043061735363
ENSG00000128284	APOL3	5.81168036680482e-26	4.39916529098711e-23	-1.64432152849903	0.156047051286976	4.47845476151296	1.21718460937433	0.0101232030728177	0.36806841814641	0.172960943159144	0.36806841814641	1.64432152849903
ENSG00000184979	USP18	8.46790979839538e-26	6.1184497343315e-23	-1.88189830899615	0.179196372171932	6.1523944880051	1.60486000596602	0.00592188760246025	0.492800881267847	0.118936591270156	0.492800881267847	1.88189830899615
ENSG00000221963	APOL6	1.15669189426329e-25	7.74664518299691e-23	-1.30298327917479	0.12442066210319	7.06570415107106	0.726342845843693	0.00145487029608694	0.238973540642286	0.121627699862469	0.238973540642286	1.30298327917479
ENSG00000132530	XAF1	1.16959917206798e-25	7.74664518299691e-23	-2.20283293229624	0.21036756689044	4.80025835870233	2.04938709061914	0.00724350754861427	0.680075473707402	0.151965475675337	0.680075473707402	2.20283293229624
ENSG00000169248	CXCL11	1.59874354499328e-25	1.01654509564853e-22	-4.37125308847753	0.418633128899523	4.49094585070352	8.32596977724387	0.075830715658397	2.64604290826103	0.171977151409095	2.64604290826103	4.37125308847753
ENSG00000110492	MDK	3.64380506910053e-25	2.22776636070854e-22	-1.21448046939953	0.117191121512489	7.95563369557042	0.635540230101708	0.000669177856401164	0.21263049568427	0.135688425558571	0.21263049568427	1.21448046939953
ENSG00000111331	OAS3	7.85744644914786e-25	4.62599884280201e-22	-2.23499102686271	0.217210618323462	7.13936097895781	2.16332071929109	0.00827471208709423	0.724487177020364	0.122336507994847	0.724487177020364	2.23499102686271
ENSG00000157601	MX1	1.5275313813507e-24	8.6720138706967e-22	-1.81673200485923	0.177670276711236	8.70738745811268	1.45501051996553	0.000805464048160311	0.48945890065618	0.158598813713941	0.48945890065618	1.81673200485923
ENSG00000133106	EPSTI1	2.00046165475782e-24	1.09652891255277e-21	-2.24107387368645	0.219731758842856	4.46590356518161	2.24014118060655	0.0113793594698888	0.73849142575483	0.173966289021723	0.73849142575483	2.24107387368645
ENSG00000119917	IFIT3	2.59005152066988e-24	1.37238196575228e-21	-2.8500296060452	0.280128287350282	7.19774866428249	3.46015728948341	0.00360011155223473	1.21515009420431	0.122953186153367	1.21515009420431	2.8500296060452
ENSG00000088827	SIGLEC1	7.21056345336614e-24	3.6973908598293e-21	-3.49995968380077	0.347430495765732	3.92945520105889	5.29925322339392	0.110719849541673	1.76400114058767	0.231777193175808	1.76400114058767	3.49995968380077
ENSG00000108679	LGALS3BP	1.03507782038158e-23	5.14174907274549e-21	-1.11523147897164	0.111098343769349	7.64233764269447	0.568628650338453	0.000359604864270792	0.191337670009637	0.129309736506734	0.191337670009637	1.11523147897164
ENSG00000142089	IFITM3	1.15915000457933e-23	5.58359044630091e-21	-2.22302027438325	0.221702068544783	7.67942746518824	2.01848249842554	0.000673241680035627	0.762705849110955	0.129979021617875	0.762705849110955	2.22302027438325
ENSG00000169245	CXCL10	1.86394784858674e-23	8.71450441209846e-21	-4.29977572464826	0.430837596744681	5.81771649622868	8.34216901189433	0.0451675975130464	2.83772165588521	0.121133139618032	2.83772165588521	4.29977572464826
ENSG00000089692	LAG3	3.49553979913478e-23	1.54347501797351e-20	-2.67190739287163	0.269414611516998	5.27539372602575	3.28942076644565	0.0266285989440803	1.10068062681784	0.132160850241649	1.10068062681784	2.67190739287163
ENSG00000267534	S1PR2	4.25629519610902e-23	1.82859644425268e-20	-1.15598902258265	0.116792790462505	4.62825842294623	0.616417393655586	0.0166000670659509	0.195252065291074	0.162159915672672	0.195252065291074	1.15598902258265
ENSG00000059378	PARP12	4.90752717472532e-23	2.05289610445878e-20	-1.31603653834572	0.133154563981857	5.12344711706119	0.785602852006095	0.00392813086389906	0.271439497074288	0.137159867936487	0.271439497074288	1.31603653834572
ENSG00000115415	STAT1	6.5257474665481e-23	2.65982773662176e-20	-1.48139021512109	0.150319599656968	7.9537280346428	0.953319711294863	0.00117432567516541	0.34976496241376	0.135644501284355	0.34976496241376	1.48139021512109
ENSG00000100558	PLEK2	7.27991793565623e-23	2.89303938762979e-20	-1.12391346075377	0.114173077371202	4.64021967261812	0.566618095684649	0.0126424572806436	0.189812392100389	0.161382874752264	0.189812392100389	1.12391346075377
ENSG00000163840	DTX3L	1.54222011215448e-22	5.97930022019698e-20	-1.28098585948858	0.13113886185022	5.74610232291205	0.70639867946833	0.00279944588026963	0.264294220755799	0.121994870315123	0.264294220755799	1.28098585948858
ENSG00000225492	GBP1P1	5.22105354144148e-22	1.93008993243613e-19	-2.07830611461826	0.21550662699833	4.34904924112618	1.91680767832045	0.0479182052623813	0.67339192080404	0.184028904788425	0.67339192080404	2.07830611461826
ENSG00000168394	TAP1	1.2319305276978e-21	4.3517261485076e-19	-1.60147708255112	0.167600429956544	8.13011895392518	1.15629547544486	0.00148487339561865	0.434780783791862	0.139991331658657	0.434780783791862	1.60147708255112
ENSG00000143185	XCL2	2.44382947729664e-21	8.26534327044838e-19	-2.39077754324921	0.252081558724734	1.72578179736972	2.66856064773184	0.143909254305881	0.84301295220555	0.766203690142317	0.84301295220555	2.39077754324921
ENSG00000132109	TRIM21	3.18139696032406e-21	1.03207114451656e-18	-1.44291848175843	0.152583330311938	5.75087409907792	0.894004926280727	0.00724263927503307	0.354346143376209	0.121932115376593	0.354346143376209	1.44291848175843
ENSG00000240065	PSMB9	3.91393279712801e-21	1.21991913221857e-18	-1.40214482764887	0.148612688901247	5.09545075490661	0.881954827020493	0.0250577677926023	0.317956791438942	0.138211696047707	0.317956791438942	1.40214482764887
ENSG00000140464	PML	4.60110712140766e-21	1.40652305388262e-18	-1.28176928899695	0.13609897380793	6.73958376586886	0.765855464945724	0.00315353058858872	0.284527000020704	0.119391535307114	0.284527000020704	1.28176928899695
ENSG00000130487	KLHDC7B	4.99799555996618e-21	1.49902146077778e-18	-1.66178709605681	0.176612501547987	6.15720560260813	1.36970222692086	0.00767514510519746	0.47676893559171	0.118921782122192	0.47676893559171	1.66178709605681
ENSG00000140105	WARS1	8.8768914174156e-21	2.61309381428219e-18	-1.75822838184042	0.188072860502188	6.48456638444705	1.42165376939758	0.00105590877255985	0.548299025794558	0.118638412881118	0.548299025794558	1.75822838184042
ENSG00000177409	SAMD9L	2.27204465680689e-20	6.44936104725042e-18	-2.0311287720814	0.219611961590931	5.85396193636414	1.93777259194771	0.00693486061391122	0.742118491831711	0.120758996818394	0.742118491831711	2.0311287720814
ENSG00000100600	LGMN	3.21086579456097e-20	8.95437239830548e-18	-1.2138894559777	0.131777333468609	5.43594343573808	0.690009993078938	0.0060435072459602	0.26365727149081	0.127905054124619	0.26365727149081	1.2138894559777
ENSG00000162654	GBP4	3.38216028172527e-20	9.11234234547539e-18	-2.32467553849533	0.252514927654353	4.70201101075447	2.4684920162318	0.0262305940779583	0.964087886768984	0.157541942364293	0.964087886768984	2.32467553849533
ENSG00000135114	OASL	3.36879755565632e-20	9.11234234547539e-18	-3.05943131271893	0.332311495474301	5.69664299657285	4.22003071647352	0.0289997501251797	1.68610835605832	0.12269301776412	1.68610835605832	3.05943131271893
ENSG00000173193	PARP14	1.03760378252811e-19	2.74895828784449e-17	-1.43819375193236	0.158305337877501	6.84264414510398	0.999179450418777	0.00281950804322498	0.386397569953406	0.119941595851302	0.386397569953406	1.43819375193236
ENSG00000137628	DDX60	1.31166474502736e-19	3.41806930933687e-17	-1.40764879225937	0.155379862508684	5.34277136420193	0.939127054826948	0.00960977454398718	0.365354797042885	0.130267511722033	0.365354797042885	1.40764879225937
ENSG00000138496	PARP9	1.40903959553558e-19	3.61259571139251e-17	-1.37308917955619	0.151695942120066	7.31923824702245	0.854015706568099	0.00201172747328674	0.355383457294441	0.124394458056216	0.355383457294441	1.37308917955619
ENSG00000108700	CCL8	1.43574839114037e-19	3.62264387707418e-17	-4.69800390455757	0.519142970367648	2.79644741233522	10.4614960586173	0.0921294192144508	4.09363445281031	0.501198970083852	4.09363445281031	4.69800390455757
ENSG00000119922	IFIT2	2.46330093175038e-19	6.11822368923501e-17	-3.06214240462803	0.340601316369455	6.57103081739641	4.34081620595066	0.00859551463172856	1.7931498526871	0.118797507340924	1.7931498526871	3.06214240462803
ENSG00000276561	IRF7	2.80627836374649e-19	6.75887891971427e-17	-1.97963657923349	0.220546190672203	6.45200564486007	1.89651264267514	0.0133426203136874	0.742097231917541	0.118603938997073	0.742097231917541	1.97963657923349
ENSG00000170581	STAT2	2.76660225127953e-19	6.75887891971427e-17	-1.22184742339412	0.136099097986786	6.80071090645561	0.718023057346728	0.00424297956222446	0.283438076015839	0.119700536033866	0.283438076015839	1.22184742339412
ENSG00000133328	PLAAT2	3.3947512189068e-19	8.05417393667799e-17	-1.77915266136576	0.198675136524988	6.49328163386615	1.59892389925318	0.0036455137228999	0.609393071249264	0.118649998327209	0.609393071249264	1.77915266136576
ENSG00000108771	DHX58	3.85555246999205e-19	9.01292089161671e-17	-1.238353417351	0.138502302450739	5.48451127791562	0.744797896535423	0.0075655415503358	0.290364814839441	0.1267706487808	0.290364814839441	1.238353417351
ENSG00000241253	CFB	4.81657457119661e-19	1.10962709251799e-16	-2.03377808425112	0.228093883895495	4.87190196997224	1.91851345231955	0.0543211962723345	0.753709855165955	0.148244369596299	0.753709855165955	2.03377808425112
ENSG00000291086	LGALS17A	5.12859820284269e-19	1.14822812721672e-16	-4.35221642126657	0.48849435569969	3.32748861107808	9.04587974362025	0.161326461002604	3.5447968905293	0.351820182445191	3.5447968905293	4.35221642126657
ENSG00000290525	GBP1P1	5.10369836373832e-19	1.14822812721672e-16	-2.47567048837312	0.277853328429248	3.18036518057095	3.00042505728417	0.129450699336877	1.06958462274045	0.387764209353263	1.06958462274045	2.47567048837312
ENSG00000172183	ISG20	7.4141224032628e-19	1.6368734683648e-16	-1.87456903960377	0.21137397955527	7.22944097501476	1.66595910698465	0.00201150821246885	0.691899564885495	0.123308435543109	0.691899564885495	1.87456903960377
ENSG00000168961	LGALS9	1.5019903648777e-18	3.27063545754739e-16	-1.13671659088327	0.129326341804185	6.32694228852062	0.625688562919493	0.0012798380242626	0.258481645521592	0.118600504220335	0.258481645521592	1.13671659088327
ENSG00000002549	LAP3	1.5810611634576e-18	3.3962903046381e-16	-1.28415086668262	0.14619611910486	6.77656313608935	0.802041636780764	0.000886912824887119	0.331062922852833	0.119572473978345	0.331062922852833	1.28415086668262
ENSG00000185880	TRIM69	1.82147308123411e-18	3.86055147990633e-16	-1.2412650525389	0.141570430520061	4.42138996718877	0.723440980526707	0.020086389587709	0.291189781270254	0.177659278471386	0.291189781270254	1.2412650525389
ENSG00000165949	IFI27	2.77932533478179e-18	5.81317835811728e-16	-1.56162827697492	0.179083559924091	8.7987056122598	1.20310617500913	0.00343103527852894	0.494663994021254	0.162231784427874	0.494663994021254	1.56162827697492
ENSG00000134470	IL15RA	3.45525302558276e-18	7.13307819411215e-16	-1.42302252815161	0.163651812448961	4.56964558492747	1.00669080112425	0.0202813842270776	0.395669841907106	0.166139373880758	0.395669841907106	1.42302252815161
ENSG00000134321	RSAD2	3.77690934555011e-18	7.69714755857238e-16	-2.65000966541134	0.30511378796462	6.35761263669523	3.42436316298375	0.00880468590685745	1.43704930203026	0.118582425820347	1.43704930203026	2.65000966541134
ENSG00000115267	IFIH1	4.22751712952051e-18	8.50640661909595e-16	-1.63657869297948	0.188709086569325	6.37179518321819	1.2728318616554	0.00420820701201891	0.548869807096377	0.118578221328156	0.548869807096377	1.63657869297948
ENSG00000204267	TAP2	6.10438195780401e-18	1.21294069501566e-15	-1.55238920754984	0.179870871013724	7.07653306623116	1.1612752446533	0.00712758433268653	0.495356655949655	0.121727109508914	0.495356655949655	1.55238920754984
ENSG00000100453	GZMB	2.2995390298077e-17	4.51277437257077e-15	-3.16765924550464	0.373651970680594	4.91497318449406	4.87632974651287	0.0324703481208092	2.13590930814737	0.1461248245864	2.13590930814737	3.16765924550464
ENSG00000128335	APOL2	3.11224519185912e-17	6.03320116704787e-15	-1.28690729760994	0.152436108822918	4.94128789145094	0.817740372260069	0.0030455847507713	0.357845769716245	0.144868092311687	0.357845769716245	1.28690729760994
ENSG00000107201	RIGI	3.19481362578373e-17	6.11864546933231e-15	-2.04365926033651	0.242162302811498	5.97541659391567	2.05760638658939	0.0281823698608025	0.882598385603348	0.119773044214843	0.882598385603348	2.04365926033651
ENSG00000285048	IRF9	3.82001235297174e-17	7.22891861462367e-15	-1.04188497612409	0.12376436240169	5.70530651177502	0.521460700841351	0.01655940317921	0.221339252256871	0.122564299982089	0.221339252256871	1.04188497612409
ENSG00000073605	GSDMB	5.0947979691193e-17	9.52787159024945e-15	-1.11587464915605	0.133088024555342	6.32826633444166	0.710677191349756	0.00364431918041571	0.271448166465991	0.11859947000065	0.271448166465991	1.11587464915605
ENSG00000121858	TNFSF10	8.24917541287811e-17	1.52475456236175e-14	-1.47549323555946	0.177180906957446	7.27271681691147	1.08531775719232	0.00102792320008525	0.48653942159921	0.123817074856972	0.48653942159921	1.47549323555946
ENSG00000152778	IFIT5	1.03772517599563e-16	1.89605510317547e-14	-1.27093556024635	0.153117620988788	4.90498325443471	0.822602049691031	0.0359930087973386	0.328132509175247	0.146609276896915	0.328132509175247	1.27093556024635
ENSG00000188820	CALHM6	1.92549590629737e-16	3.43906549735988e-14	-2.31300339427251	0.281160403250652	4.58758367025632	2.73455374304457	0.0250185680274684	1.20272900668993	0.164890129970996	1.20272900668993	2.31300339427251
ENSG00000162614	NEXN	2.3970737846098e-16	4.23376498668416e-14	-2.15089879536228	0.262293844161764	3.71981988559451	2.35656751838333	0.0939109697038428	0.974595032598038	0.266041647281993	0.974595032598038	2.15089879536228
ENSG00000188282	RUFY4	4.07904113246922e-16	7.047873678449e-14	-1.94718721098445	0.239324141575727	2.20263184030824	2.01271377945593	0.0690631833230008	0.820493833028045	0.669646868291848	0.820493833028045	1.94718721098445
ENSG00000017483	SLC38A5	1.00430410421102e-15	1.64581629283901e-13	-1.72910201634954	0.215428675329485	3.95848750413304	1.61840223919277	0.0444540049556668	0.676334400180207	0.22777389942163	0.676334400180207	1.72910201634954
ENSG00000134326	CMPK2	9.98145219979468e-16	1.64581629283901e-13	-2.12960926135441	0.265302884174762	5.0470692997904	2.30686233342823	0.00737673178764636	1.08578573634411	0.14014019708539	1.08578573634411	2.12960926135441
ENSG00000284194	SCO2	1.04204199392735e-15	1.69023464647645e-13	-1.19292207724957	0.14870996991467	6.33533208959684	0.702961726929923	0.00380499610390372	0.33965878083175	0.118594338038107	0.33965878083175	1.19292207724957
ENSG00000105559	PLEKHA4	1.71396137328159e-15	2.72451299896841e-13	-1.45971992358558	0.183371224586721	4.30633415409708	1.18638167456765	0.0203925685128179	0.501839023300978	0.188013381211165	0.501839023300978	1.45971992358558
ENSG00000100079	LGALS2	2.17762533768791e-15	3.36073129785311e-13	-1.73070219996436	0.218225799877687	3.73784354028959	1.57537737598402	0.0482551532804503	0.691372189434966	0.262695529909124	0.691372189434966	1.73070219996436
ENSG00000205413	SAMD9	2.92449077539819e-15	4.46997166978169e-13	-1.55614683699276	0.197128169160118	6.12174972453641	1.26538240807157	0.00419787256650929	0.599331132352871	0.119039588657601	0.599331132352871	1.55614683699276
ENSG00000243649	CFB	2.99403412915282e-15	4.53268252542984e-13	-1.91732722849185	0.242971696742161	6.27750341009872	1.94795827295711	0.0572692869190127	0.859609960083606	0.118655509575169	0.859609960083606	1.91732722849185
ENSG00000185885	IFITM1	3.56146627084209e-15	5.29094091974822e-13	-2.26167015201166	0.28739802482677	8.15159271138977	2.55921866932564	0.00103978262656539	1.28178791428032	0.140560258946772	1.28178791428032	2.26167015201166
ENSG00000025708	TYMP	3.64371362267316e-15	5.36300664314932e-13	-1.41233502677876	0.179535336478471	8.34790326611247	1.00113408361289	0.000590386114072611	0.500020915437216	0.146181610667117	0.500020915437216	1.41233502677876
ENSG00000130813	SHFL	4.22055643171459e-15	6.04414099446263e-13	-1.10275272381698	0.14051029875632	5.92965970718044	0.692417097468094	0.00421897965427675	0.302412743953729	0.120099171263551	0.302412743953729	1.10275272381698
ENSG00000130707	ASS1	4.29320703928501e-15	6.09328741932808e-13	-1.03742879312808	0.132222943077295	7.22842355021848	0.584385044063843	0.00127021815542617	0.270257649563137	0.123296805125964	0.270257649563137	1.03742879312808
ENSG00000179044	EXOC3L1	4.96447498410544e-15	6.86219950846436e-13	-1.94173716300957	0.248056294826073	3.8436456146533	1.91254121990217	0.119296161894202	0.83635914250469	0.244535112080368	0.83635914250469	1.94173716300957
ENSG00000160791	CCR5	5.85459145554646e-15	7.95423810062962e-13	-1.86357519079269	0.238704398922597	4.1322244324994	2.09184342602294	0.0392365482016383	0.845719322472898	0.206157802093357	0.845719322472898	1.86357519079269
ENSG00000173821	RNF213	6.38515111080292e-15	8.60155610655281e-13	-1.11377062632241	0.142862599385877	5.40706230979086	0.67231484432283	0.00471931269910969	0.312265069843013	0.128609164136125	0.312265069843013	1.11377062632241
ENSG00000117228	GBP1	7.37971108848099e-15	9.85780566911713e-13	-1.98500587501328	0.255214339860336	5.76474578467006	2.00418284853695	0.00358797217507288	1.00801690655764	0.121754129371046	1.00801690655764	1.98500587501328
ENSG00000138755	CXCL9	1.05765389931551e-14	1.40103886529327e-12	-2.69786714664228	0.348916615434343	5.16827455959805	3.92518199792238	0.045079875620241	1.84571349962574	0.13556641026534	1.84571349962574	2.69786714664228
ENSG00000242335	CFB	1.43339918647911e-14	1.86764864494034e-12	-1.50638667055807	0.195803921884102	5.71903756835437	1.19627903148585	0.00932328937032308	0.586124301514569	0.122365957394631	0.586124301514569	1.50638667055807
ENSG00000243570	CFB	1.43339918647912e-14	1.86764864494034e-12	-1.50638667055807	0.195803921884102	5.71903756835437	1.19627903148585	0.00932328937032308	0.586124301514569	0.122365957394631	0.586124301514569	1.50638667055807
ENSG00000241534	CFB	1.47712365274017e-14	1.90897216129737e-12	-1.50841774272593	0.196165934286998	5.71887501649864	1.20033726754647	0.00935436107631648	0.588297053713497	0.122368265225276	0.588297053713497	1.50841774272593
ENSG00000091513	TF	1.53579144187019e-14	1.96878554515875e-12	-1.81724273882251	0.236481160743144	3.26467013755541	1.73012295121026	0.036301695052388	0.832246389124251	0.366661926868525	0.832246389124251	1.81724273882251
ENSG00000278211	TRIM69	1.96695523879727e-14	2.50133763807371e-12	-1.16442636413209	0.15215750148008	4.96940239880146	0.720460297310046	0.0291279381238891	0.33044542026881	0.143554540228473	0.33044542026881	1.16442636413209
ENSG00000183486	MX2	2.07018702268708e-14	2.61172165973284e-12	-1.93074797536611	0.252511055030966	6.95400035669425	1.96123738886242	0.00496320820190362	0.985324897402384	0.120697704987873	0.985324897402384	1.93074797536611
ENSG00000104972	LILRB1	2.28609974171585e-14	2.86140484207206e-12	-2.92211297816543	0.382805309952293	3.73856654010853	4.41304302403202	0.0910963008702158	2.18482204421114	0.262562770421967	2.18482204421114	2.92211297816543
ENSG00000168899	VAMP5	2.81045831409836e-14	3.4902379188209e-12	-1.20038389395452	0.157804822109006	6.11850339447011	0.810757242587379	0.0033864938880496	0.383373290852921	0.119051408852718	0.383373290852921	1.20038389395452
ENSG00000185338	SOCS1	2.85940839615169e-14	3.52350045466879e-12	-2.31451761761548	0.304360371593696	5.20072146767904	2.97488974503457	0.0280105258768373	1.41071179402033	0.134478112940472	1.41071179402033	2.31451761761548
ENSG00000078081	LAMP3	3.02195269652529e-14	3.69515077415124e-12	-1.49817101080445	0.19719584594107	4.43343133655439	1.25152299798054	0.00573075564490329	0.598212719836882	0.176643185335456	0.598212719836882	1.49817101080445
ENSG00000180644	PRF1	3.09804292735513e-14	3.75927407429291e-12	-2.28102503641926	0.300365827160322	5.1214792118598	3.05514888691323	0.0481702701711978	1.35303516141694	0.137232336488418	1.35303516141694	2.28102503641926
ENSG00000281449	BCL2L14	3.23904158992195e-14	3.87126354236085e-12	-1.09869375927443	0.144786143551046	3.80780302372949	0.702928674073675	0.0153756074507039	0.310202182710696	0.25039384102204	0.310202182710696	1.09869375927443
ENSG00000121380	BCL2L14	3.23904158992195e-14	3.87126354236085e-12	-1.09869375927443	0.144786143551046	3.80780302372949	0.702928674073675	0.0153756074507039	0.310202182710696	0.25039384102204	0.310202182710696	1.09869375927443
ENSG00000130300	PLVAP	4.66056851070335e-14	5.48773311452892e-12	-1.81904816150091	0.241218178725361	1.28185731551251	1.70704627198582	0.0860177247748534	0.759585108691199	0.817675108239849	0.817675108239849	1.81904816150091
ENSG00000224389	C4B	6.03177872195275e-14	7.0500848944236e-12	-1.73141578598698	0.230628189646527	5.57737563018962	1.67885338569842	0.0168513981423711	0.809235149060098	0.124766050435408	0.809235149060098	1.73141578598698
ENSG00000008517	IL32	6.09904300847229e-14	7.07667063231208e-12	-1.46661323902126	0.195393740470853	5.79521634385338	1.21134006813614	0.00761916608326713	0.585336281576603	0.121385812986114	0.585336281576603	1.46661323902126
ENSG00000131203	IDO1	7.74299210735793e-14	8.79161446704011e-12	-2.45629330056585	0.328618014489826	6.08259824350759	3.38090591126064	0.0105808189380728	1.66661397038605	0.119194486351398	1.66661397038605	2.45629330056585
ENSG00000111537	IFNG	7.72684314554549e-14	8.79161446704011e-12	-2.60427480894218	0.348403092469785	1.89896310573357	3.68870676913576	0.135943995431382	1.7492878716481	0.735615379435856	1.7492878716481	2.60427480894218
ENSG00000010030	ETV7	7.97240100126962e-14	8.98789264653773e-12	-1.96438282987086	0.262942317192389	5.17170204775577	2.10093360075562	0.0152449747335699	1.05855092568262	0.135448949913134	1.05855092568262	1.96438282987086
ENSG00000112773	TENT5A	8.43535110073852e-14	9.18413295187257e-12	-1.14548190566359	0.1534810470795	6.19445099706952	0.759287833062535	0.0104642987606143	0.355391781104584	0.118818798301087	0.355391781104584	1.14548190566359
ENSG00000124256	ZBP1	8.42153297610487e-14	9.18413295187257e-12	-2.76242642173288	0.370121808151584	3.86530374762237	4.18415534475895	0.105208072471701	2.02239260608619	0.241147120770747	2.02239260608619	2.76242642173288
ENSG00000244731	C4A	8.36145689698473e-14	9.18413295187257e-12	-1.73957322260651	0.233046085954918	5.40171071518674	1.67601279160962	0.022097208989542	0.821401449898801	0.128742262579835	0.821401449898801	1.73957322260651
ENSG00000168016	TRANK1	9.01524185075708e-14	9.74872683398874e-12	-1.26900524060269	0.170231549937808	5.60419006246883	0.915034480360598	0.00999991944119823	0.440070921160322	0.124248708729907	0.440070921160322	1.26900524060269
ENSG00000102794	ACOD1	1.09565965807625e-13	1.161107061652e-11	-3.74499733094319	0.504116997195829	2.08903190211679	7.65600453936391	0.0497275631873715	3.89723903596017	0.69601942542434	3.89723903596017	3.74499733094319
ENSG00000164342	TLR3	1.21629850879391e-13	1.28041596660848e-11	-1.01144304722258	0.136405097363999	4.35528407170703	0.592739955520567	0.0265139769052856	0.262462152436485	0.183461515379787	0.262462152436485	1.01144304722258
ENSG00000196684	HSH2D	1.45400418753849e-13	1.51064382778509e-11	-1.4307078620034	0.193566478252604	5.68607212772372	1.14727803896965	0.00674882332387163	0.57516820648062	0.122853880715464	0.57516820648062	1.4307078620034
ENSG00000159189	C1QC	1.48807408478683e-13	1.53600166569945e-11	-1.39653800266358	0.189022255155718	6.49121482889074	1.13758330357097	0.00349393592021474	0.551421301651122	0.118647160732068	0.551421301651122	1.39653800266358
ENSG00000197471	SPN	1.67965742206615e-13	1.72256996007507e-11	-1.22005811443064	0.165496770814177	3.84141557091765	0.918016087592813	0.0455263920919355	0.379856302788851	0.244890536543725	0.379856302788851	1.22005811443064
ENSG00000125730	C3	1.91222287649197e-13	1.94850607978951e-11	-1.19366018711104	0.162296896962243	8.35483504356878	0.760743299132472	0.00123625650712602	0.407855946890974	0.146394362154416	0.407855946890974	1.19366018711104
ENSG00000178685	PARP10	2.14479264288774e-13	2.17156839817475e-11	-1.08902163230234	0.148379262538779	5.21459795557302	0.696982111680135	0.00254694413690172	0.339390913510027	0.134028375194309	0.339390913510027	1.08902163230234
ENSG00000112343	TRIM38	3.67849690791513e-13	3.63188738187695e-11	-1.04131552053252	0.143295835940963	6.48573896389262	0.613790552501107	0.00233544222390901	0.316574391075555	0.118639913620673	0.316574391075555	1.04131552053252
ENSG00000139410	SDSL	3.86181944488105e-13	3.78935073431044e-11	-1.02710642902358	0.141468522311725	4.29285130904713	0.670657543689602	0.0159579247829634	0.294870268633673	0.189307102690086	0.294870268633673	1.02710642902358
ENSG00000160233	LRRC3	5.39530789197956e-13	5.166494834392e-11	-2.10944965467954	0.292371967216368	2.35932493683267	2.49609268565584	0.0987957110300262	1.22881953049676	0.630363827558585	1.22881953049676	2.10944965467954
ENSG00000288512	C1R	7.13111548693245e-13	6.70746815267918e-11	-1.35132736151626	0.18828851576263	3.80193886644694	0.978669952322896	0.0128143540160293	0.537801147378194	0.251381665867127	0.537801147378194	1.35132736151626
ENSG00000159403	C1R	7.13111548693245e-13	6.70746815267918e-11	-1.35132736151626	0.18828851576263	3.80193886644694	0.978669952322896	0.0128143540160293	0.537801147378194	0.251381665867127	0.537801147378194	1.35132736151626
ENSG00000160182	TFF1	1.2156100810419e-12	1.1234498748978e-10	-2.06520247115684	0.2907267669169	6.34905737717957	2.30946588527709	0.00381726665644551	1.30889881952462	0.118586232881878	1.30889881952462	2.06520247115684
ENSG00000104951	IL4I1	1.75292204585814e-12	1.5862983070312e-10	-2.81436022188271	0.399038826518979	4.19249747805313	4.62994022574909	0.0600830481566532	2.41295660021338	0.199510974886302	2.41295660021338	2.81436022188271
ENSG00000155287	SLC25A28	1.75634437617949e-12	1.5862983070312e-10	-1.03601636974092	0.146898984843399	6.57814983663992	0.619315096955799	0.00311469589508841	0.332034636784854	0.118814989284424	0.332034636784854	1.03601636974092
ENSG00000185507	IRF7	1.95495636801032e-12	1.74505125211843e-10	-2.87022387890015	0.407837841701719	5.4381023108878	4.52082826523397	0.20539566835326	2.37791007497795	0.12785334914889	2.37791007497795	2.87022387890015
ENSG00000291143		1.96504890619778e-12	1.74505125211843e-10	-1.53044967894544	0.217487897983237	2.73724526715059	1.29998415620418	0.113564889956038	0.621069003874864	0.51996890166943	0.621069003874864	1.53044967894544
ENSG00000128203	ASPHD2	2.25882317426453e-12	1.99479184322828e-10	-1.00528653001773	0.143254341540063	4.34913338535492	0.609277089674519	0.0557074309331169	0.263017734662076	0.184021223683835	0.263017734662076	1.00528653001773
ENSG00000140853	NLRC5	4.55527922587277e-12	3.89304938572439e-10	-1.17834392293477	0.170310773152059	5.42555184732347	0.800160815919097	0.00997564271229153	0.440514207826506	0.128155703880904	0.440514207826506	1.17834392293477
ENSG00000123609	NMI	4.65254012924552e-12	3.95490790879608e-10	-1.09511123238266	0.158349341053038	6.08160867510155	0.681982098335853	0.0031489397865178	0.386284544908072	0.119198761128531	0.386284544908072	1.09511123238266
ENSG00000173369	C1QB	5.71408485536725e-12	4.80587792914909e-10	-1.35508584967487	0.196771336012954	6.33479290169878	1.15317995508503	0.00446575466967148	0.596880262013269	0.118594706676153	0.596880262013269	1.35508584967487
ENSG00000187474	FPR3	5.78951694466188e-12	4.84369270275501e-10	-2.19647975948199	0.319036205470675	3.74065435557233	2.92773523686674	0.0661739876556594	1.51463979015141	0.262180040294227	1.51463979015141	2.19647975948199
ENSG00000115523	GNLY	6.79404924330163e-12	5.65435637547239e-10	-2.47403219513833	0.360545113615377	4.2585691714234	3.98980794068096	0.0632654064031657	1.9556587199858	0.192677003983857	1.9556587199858	2.47403219513833
ENSG00000146859	TMEM140	7.00190565663186e-12	5.76695815118239e-10	-1.50306894788903	0.21918242427169	5.25913391201704	1.31307196942537	0.0108106065806628	0.735315476183973	0.13264458829982	0.735315476183973	1.50306894788903
ENSG00000139437	TCHP	6.96812301570213e-12	5.76695815118239e-10	-1.12654454102909	0.164259851246592	5.91959339919077	0.831850398150067	0.0135641964296651	0.40548365691752	0.120177979111426	0.40548365691752	1.12654454102909
ENSG00000122643	NT5C3A	7.99616095768393e-12	6.45213068950984e-10	-1.05742324551951	0.154625316636209	5.47909978040001	0.688087572057333	0.00445485860291045	0.366876796893146	0.126894193003702	0.366876796893146	1.05742324551951
ENSG00000169136	ATF5	1.07610575490792e-11	8.51033685572949e-10	-1.01774241986197	0.149757476420776	5.10854475934984	0.66661507384963	0.00687812109217	0.341441385157863	0.137714121781184	0.341441385157863	1.01774241986197
ENSG00000124201	ZNFX1	1.10389174672221e-11	8.686862973216e-10	-1.01773439673404	0.149837338913982	6.51323445836278	0.614177747162626	0.00207741304574971	0.3466136951056	0.118680275404849	0.3466136951056	1.01773439673404
ENSG00000182578	CSF1R	1.21834015853302e-11	9.54026362563592e-10	-1.38094420429243	0.203738586056902	3.93830760684095	1.19833494817117	0.0237166235257832	0.620968049893708	0.230543803836191	0.620968049893708	1.38094420429243
ENSG00000108244	KRT23	1.36728090091058e-11	1.06020961955486e-09	-1.77462726558855	0.26246708015592	4.80130444944448	1.79602839645024	0.13269137005458	0.937226520714993	0.151909209815874	0.937226520714993	1.77462726558855
ENSG00000171631	P2RY6	1.483549727507e-11	1.14478186740055e-09	-1.76639124440548	0.26170695708857	4.07614519271714	1.9041925574743	0.0513690514676509	1.01236069848023	0.212719591256003	1.01236069848023	1.76639124440548
ENSG00000196329	GIMAP5	1.52491106512163e-11	1.17101383049147e-09	-1.71259077017597	0.253886056529817	4.69029788527925	1.93223003097404	0.0895297105639245	0.91157261406516	0.158248662225666	0.91157261406516	1.71259077017597
ENSG00000140274	DUOXA2	1.72252128033050e-11	1.31010518048487e-09	-2.44670634713623	0.363671301948441	6.37712885371279	3.6095182290235	0.0202073038497681	2.03387968908738	0.118577320251443	2.03387968908738	2.44670634713623
ENSG00000145649	GZMA	2.16837357723393e-11	1.61067599923881e-09	-1.65993560926346	0.247965808391488	4.97329338304102	1.88193388139336	0.0317305161420263	0.923227703998601	0.143374980898757	0.923227703998601	1.65993560926346
ENSG00000167105	TMEM92	2.33617684476184e-11	1.72724963368996e-09	-1.3501915242259	0.202024621313812	4.28850412245308	1.07914133414621	0.0259476242150377	0.607935766858467	0.189727995246163	0.607935766858467	1.3501915242259
ENSG00000137745	MMP13	2.46320529525068e-11	1.79610602629838e-09	-2.24336597989398	0.336057516314383	2.92362379651946	3.09138613870265	0.0734935143600773	1.68050005399216	0.461378425369596	1.68050005399216	2.24336597989398
ENSG00000141574	SECTM1	2.87995141695826e-11	2.06214899657516e-09	-1.95763018020548	0.294266220464392	5.84235019629006	2.28597813001882	0.00388000859138868	1.34099397510256	0.1208745522902	1.34099397510256	1.95763018020548
ENSG00000132274	TRIM22	2.95969544440106e-11	2.10974523695961e-09	-1.18903158733156	0.178840404825317	6.89351706120841	0.85913013297888	0.0057069238263455	0.491036422235605	0.120266029805695	0.491036422235605	1.18903158733156
ENSG00000173372	C1QA	3.20084175627398e-11	2.27145448918443e-09	-1.32441397901608	0.199549437268082	6.55286508311195	1.12161801101809	0.00624957684679439	0.612196422777528	0.118755924295253	0.612196422777528	1.32441397901608
ENSG00000269720	CCDC194	4.05767915336043e-11	2.81663178261211e-09	-1.86223415051263	0.282073092593813	2.91531752198363	2.2240298410448	0.144976283195401	1.09075513886111	0.463937046420132	1.09075513886111	1.86223415051263
ENSG00000198959	TGM2	4.49213087351094e-11	3.05157745150983e-09	-1.07809698090229	0.163673785280096	7.06873606870791	0.721893188711776	0.00131726162083939	0.414745668007301	0.12165536694416	0.414745668007301	1.07809698090229
ENSG00000214872	SMTNL1	6.62845177227511e-11	4.35396154430104e-09	-1.95031879155437	0.298723993994572	1.35852277135327	2.48089831789737	0.148232736333251	1.23769627015811	0.811703310755318	1.23769627015811	1.95031879155437
ENSG00000128268	MGAT3	8.16911009392938e-11	5.32197434643858e-09	-1.08819391993468	0.167480070874351	3.05703988138913	0.632805202461098	0.0140356771843186	0.292609492500123	0.421603613112583	0.421603613112583	1.08819391993468
ENSG00000148803	FUOM	8.28355862411254e-11	5.37450807709767e-09	-1.0731428178227	0.16521685748485	3.88855389918162	0.750677250843586	0.048997549332871	0.374947418504894	0.237640788959256	0.374947418504894	1.0731428178227
ENSG00000135899	SP110	8.69583507291386e-11	5.61906480971702e-09	-1.32069132316163	0.203557726553965	6.32581620583845	1.07615150063483	0.00380796480372315	0.639732638659356	0.118601401827768	0.639732638659356	1.32069132316163
ENSG00000117560	FASLG	9.52209703097484e-11	6.05453017617504e-09	-1.78904020217194	0.276327385848448	2.14496196646942	2.3592321274631	0.137107404286472	1.04879411865841	0.683271974054067	1.04879411865841	1.78904020217194
ENSG00000121807	CCR2	1.16990545395152e-10	7.37968932381484e-09	-2.07820026027659	0.322542294784373	1.830298608914	2.65374877463195	0.0847213835985852	1.53102842381227	0.748400392931885	1.53102842381227	2.07820026027659
ENSG00000173762	CD7	1.18121434449199e-10	7.4215743952746e-09	-1.58063523264628	0.245374443347441	4.68893905601806	1.68196543736612	0.0216385498490812	0.913464394810484	0.158331273368831	0.913464394810484	1.58063523264628
ENSG00000137496	IL18BP	1.22568837200428e-10	7.67068596904728e-09	-2.08815736574074	0.324443678356487	4.64967497347864	2.85498220564238	0.0346287735983457	1.60022684019382	0.160776600330565	1.60022684019382	2.08815736574074
ENSG00000135077	HAVCR2	1.27492993048529e-10	7.94756320588007e-09	-1.79647380591707	0.279383649233196	4.59528502316203	2.0043808517406	0.0554376486173564	1.1568417956897	0.164362459930349	1.1568417956897	1.79647380591707
ENSG00000055332	EIF2AK2	1.76877832412604e-10	1.08978683101967e-08	-1.10783944638424	0.173637597479994	6.55677839943716	0.775897063593525	0.00567269401395079	0.462588648711432	0.118764514971258	0.462588648711432	1.10783944638424
ENSG00000237988	OR2I1P	2.18743941401694e-10	1.3221116701602e-08	-1.8315944793349	0.288550544618042	3.65015112557178	2.21298811018324	0.121095558859756	1.17204152559123	0.279607881482445	1.17204152559123	1.8315944793349
ENSG00000172345	STARD5	2.26504514250832e-10	1.36383172671637e-08	-1.10536370636029	0.174287063239873	3.90585748394922	0.809650883568693	0.0359974412897196	0.435773377155201	0.235120612420965	0.435773377155201	1.10536370636029
ENSG00000138646	HERC5	2.68170582867562e-10	1.59656913305722e-08	-1.78592135815403	0.282755019964211	5.00107280200519	2.10539875305165	0.018280338901374	1.22343320419436	0.142113859688213	1.22343320419436	1.78592135815403
ENSG00000135094	SDS	2.91581638911174e-10	1.72304153610856e-08	-1.90636592067956	0.30244463673862	3.74963481290804	2.43933399624199	0.0301202903340921	1.39054753530932	0.260544694033176	1.39054753530932	1.90636592067956
ENSG00000206190	ATP10A	2.97849463618546e-10	1.75356113840015e-08	-1.08417720171505	0.172094517734327	3.92015624525174	0.970298300631963	0.0684482364848746	0.391527412744345	0.2330849893246	0.391527412744345	1.08417720171505
ENSG00000176046	NUPR1	4.05609913111694e-10	2.36174914975219e-08	-1.29311116197649	0.206836448090379	6.55330466575823	1.21111980170604	0.00320454740002496	0.661234141038168	0.118756879234222	0.661234141038168	1.29311116197649
ENSG00000163666	HESX1	4.33820289995704e-10	2.51679099626705e-08	-1.76387553993419	0.282611382956534	3.05438481119608	2.06498643373408	0.0985202421926819	1.14193206270387	0.422366487904415	1.14193206270387	1.76387553993419
ENSG00000120708	TGFBI	4.4358507929147e-10	2.56408306196989e-08	-1.32517282855223	0.212440148856107	5.16236210454217	1.12140158506814	0.0130919307495583	0.687836964752695	0.135770454246981	0.687836964752695	1.32517282855223
ENSG00000105967	TFEC	4.73413420254323e-10	2.72658685810243e-08	-2.03453555935299	0.326692732835739	2.99679556608995	2.88996204998656	0.142305817998194	1.51529410374526	0.439222062025943	1.51529410374526	2.03453555935299
ENSG00000197540	GZMM	4.90168207887054e-10	2.81289308035112e-08	-1.46968468673463	0.236199398829137	3.52660408385452	1.598233011748	0.061634039783931	0.804845566900134	0.305822225328262	0.804845566900134	1.46968468673463
ENSG00000100450	GZMH	5.16218086757168e-10	2.95172759247911e-08	-1.89073653956117	0.304265869459695	3.04571579899551	2.61758898511286	0.0803184859023852	1.35751054278873	0.424866454883995	1.35751054278873	1.89073653956117
ENSG00000110446	SLC15A3	5.62664937287569e-10	3.20155905071932e-08	-1.65381062674923	0.266720026508778	6.86788851373894	1.72791908878645	0.00794031970521068	1.09693181628339	0.120098191846834	1.09693181628339	1.65381062674923
ENSG00000136859	ANGPTL2	6.65754370086918e-10	3.75277711592257e-08	-1.4992952766256	0.242839424386169	1.70742685112388	1.63900640631771	0.129038370816282	0.786842860628688	0.76911743828944	0.786842860628688	1.4992952766256
ENSG00000108798	ABI3	6.75947159608263e-10	3.7967689219551e-08	-1.35945116817883	0.2202746831629	4.48947136740199	1.33956397141092	0.0291519393195059	0.724429061110064	0.17209242408226	0.724429061110064	1.35945116817883
ENSG00000172724	CCL19	6.89317460436077e-10	3.85823603911686e-08	-2.1678794632337	0.351442347880093	1.31035325546711	3.08352747618448	0.0716461564441992	1.84662039074959	0.815601380457447	1.84662039074959	2.1678794632337
ENSG00000143184	XCL1	7.29625259841703e-10	4.06951688787499e-08	-1.94509884222502	0.315787045360057	1.82849911779999	2.58729539356616	0.110100183190729	1.43867859616083	0.748724039188728	1.43867859616083	1.94509884222502
ENSG00000118292	C1orf54	8.07359076974505e-10	4.44075428636219e-08	-1.0384150358026	0.169027335474352	3.36630728115144	0.754163631924148	0.052131245909507	0.391594533133781	0.342665913065533	0.391594533133781	1.0384150358026
ENSG00000176083	ZNF683	9.89073225194661e-10	5.31159053638322e-08	-1.65455506605737	0.270743050096644	2.01790474524234	1.9590736743466	0.0805289859271962	1.05792479632588	0.711531824339881	1.05792479632588	1.65455506605737
ENSG00000139626	ITGB7	1.04134307712709e-09	5.5547615953061e-08	-1.08717029840783	0.178138753631973	3.61870019509058	0.887942212066948	0.0383529114788982	0.454500297554637	0.286039178914821	0.454500297554637	1.08717029840783
ENSG00000197646	PDCD1LG2	1.09827746911601e-09	5.81940621635604e-08	-1.91201838330959	0.313732085234872	2.61108578246349	2.55724337898799	0.098160090912	1.43052715421348	0.559456622641677	1.43052715421348	1.91201838330959
ENSG00000023902	PLEKHO1	1.37412953494199e-09	7.20896471532605e-08	-1.4364224796207	0.237092841202034	4.69453354537617	1.4315912809482	0.011595639011842	0.861451416530003	0.157991990227584	0.861451416530003	1.4364224796207
ENSG00000130589	HELZ2	1.43048490305353e-09	7.43104183625454e-08	-1.29380834144577	0.213781549833337	5.44682677992492	1.17682857369212	0.0130664351497454	0.696742091866692	0.127645660364379	0.696742091866692	1.29380834144577
ENSG00000203747	FCGR3A	1.49573389029996e-09	7.74468596749451e-08	-2.03910688652006	0.337331071915981	5.56972316419997	2.8050700413304	0.0284588350907236	1.73885412623446	0.124919471715643	1.73885412623446	2.03910688652006
ENSG00000271503	CCL5	1.82032409425268e-09	9.36435980655034e-08	-1.23236400266818	0.204947253831789	6.04332031368613	1.22958677779456	0.0122644358425679	0.640092038128026	0.119378658521284	0.640092038128026	1.23236400266818
ENSG00000169583	CLIC3	2.11079220865838e-09	1.07198571721513e-07	-1.16515306867078	0.194547450787063	3.94938970851448	0.977433901259129	0.0481218163305056	0.539708335580857	0.229015540063565	0.539708335580857	1.16515306867078
ENSG00000004399	PLXND1	2.1845291231058e-09	1.09890110572436e-07	-1.02570147359564	0.171422933728722	3.23826791898959	0.789644371387536	0.0530210898481281	0.40337153371272	0.373077815493055	0.40337153371272	1.02570147359564
ENSG00000106565	TMEM176B	2.62674901283306e-09	1.30892797203744e-07	-1.29961102538117	0.218298342824715	5.10491446609433	1.21305819716736	0.0151769943884346	0.724942166115425	0.13785107066949	0.724942166115425	1.29961102538117
ENSG00000100336	APOL4	3.06396236276142e-09	1.51728179808273e-07	-1.6012423204929	0.270108990899418	5.80077412500347	1.76884744978608	0.00734863204023374	1.12577905348694	0.121321903797503	1.12577905348694	1.6012423204929
ENSG00000173702	MUC13	3.07616325243653e-09	1.51859289008482e-07	-1.52240912194504	0.256839125953367	4.98712304784148	1.80032947230197	0.00290610317813372	1.0216202559503	0.142741223634894	1.0216202559503	1.52240912194504
ENSG00000140511	HAPLN3	3.73138804953543e-09	1.83635122091068e-07	-1.99790382520772	0.338875824725672	4.39042517191174	2.74807953535132	0.0349361474325254	1.74860011988029	0.180329218196469	1.74860011988029	1.99790382520772
ENSG00000281981	TRBC1	3.80430396368689e-09	1.8607143325159e-07	-2.40615896580933	0.408343665322483	3.25947634905324	4.23226597648272	0.282842794485929	2.30687484715798	0.367909730153432	2.30687484715798	2.40615896580933
ENSG00000020633	RUNX3	4.12926567915926e-09	2.01346034465999e-07	-1.18585675406616	0.20171301998934	5.2512712579595	1.00869406032127	0.0206826243900482	0.611246880300045	0.132882516386489	0.611246880300045	1.18585675406616
ENSG00000153563	CD8A	4.51287461182959e-09	2.1738380251407e-07	-1.13521803558033	0.193584276100747	5.03497698616836	1.17961534017239	0.0347715194010735	0.547252526320259	0.14064534144945	0.547252526320259	1.13521803558033
ENSG00000196664	TLR7	5.23284217558175e-09	2.50545961515203e-07	-1.58467606396174	0.271367541665766	2.7320243122945	1.92680327541445	0.12304165262689	1.02067006497887	0.521622847698114	1.02067006497887	1.58467606396174
ENSG00000291144		5.31048485852517e-09	2.53499901835183e-07	-1.93165284762519	0.330924603146807	2.20650984847861	2.63324241379484	0.0895363765747077	1.61128569587156	0.668713732238677	1.61128569587156	1.93165284762519
ENSG00000146070	PLA2G7	5.81883057320606e-09	2.74469230835856e-07	-1.94838793554317	0.334666285864813	3.49453716955482	2.72947066876716	0.110377981725364	1.62912307815841	0.312994908773178	1.62912307815841	1.94838793554317
ENSG00000105374	NKG7	6.29835690712732e-09	2.94466709987341e-07	-1.72634030791566	0.297202317595985	4.48722650077712	2.09231128520444	0.0466625310671197	1.32518281206696	0.172268362136927	1.32518281206696	1.72634030791566
ENSG00000227243	SLAMF6P1	6.87371005931128e-09	3.19486827786e-07	-1.75760487993678	0.303350110736705	2.0590977699331	2.30851915816815	0.13084409485009	1.29834299832765	0.702645370193007	1.29834299832765	1.75760487993678
ENSG00000231372	MICB	6.9103696469243e-09	3.20254332091862e-07	-2.19019931183227	0.378071099222692	2.18489252854422	3.65865109700747	0.75490102837141	1.46507216262569	0.673888508239917	1.46507216262569	2.19019931183227
ENSG00000177294	FBXO39	9.90509239993194e-09	4.49860996540909e-07	-1.27357450266353	0.2221733459479	2.55457782257764	1.32702685401783	0.145828191005947	0.620799815743459	0.57652782779304	0.620799815743459	1.27357450266353
ENSG00000154451	GBP5	1.02200514554782e-08	4.62843128023596e-07	-1.8973750985356	0.331301412021332	6.1041568559394	2.74121679396348	0.0299088118681951	1.67478876404974	0.119105821816567	1.67478876404974	1.8973750985356
ENSG00000179921	GPBAR1	1.04379309471781e-08	4.68704379481197e-07	-1.99644716562279	0.348818539487495	1.84239570516513	2.82112120547891	0.18872523306777	1.70100533645451	0.746209398738322	1.70100533645451	1.99644716562279
ENSG00000267369	TAF5LP1	1.06485695106268e-08	4.76815946312462e-07	-1.63297853123884	0.285482703083968	1.81955965027475	2.25103542939374	0.128959560207749	1.13682667977175	0.750323081803324	1.13682667977175	1.63297853123884
ENSG00000026950	BTN3A1	1.12587570708724e-08	5.01314292433019e-07	-1.07440588354381	0.188142830007734	4.9807410004971	0.820256422050441	0.019207896729411	0.530555871341677	0.143032743924591	0.530555871341677	1.07440588354381
ENSG00000105697	HAMP	1.16744391455117e-08	5.1692725531213e-07	-2.76188975200509	0.484167175842861	2.87878987553205	5.51142831161408	0.111982900162412	3.52877211133216	0.47527412773147	3.52877211133216	2.76188975200509
ENSG00000026751	SLAMF7	1.30849572020327e-08	5.76173073915546e-07	-1.96630079467177	0.345878183278573	5.26559146154639	2.7558406044692	0.0203556532701283	1.83765033005281	0.132451148730511	1.83765033005281	1.96630079467177
ENSG00000108691	CCL2	1.71610896185956e-08	7.25512448343608e-07	-3.22526748999683	0.572015509566524	5.00573415094593	7.4360552423168	0.0544652286524644	5.02732084314407	0.141907283820017	5.02732084314407	3.22526748999683
ENSG00000104213	PDGFRL	1.75494569538587e-08	7.38005734758038e-07	-1.71322518462381	0.304056007252339	3.22276302965991	2.16380203826189	0.298254256516784	1.13759201997002	0.376928918385071	1.13759201997002	1.71322518462381
ENSG00000066294	CD84	2.12900527964314e-08	8.76753055057184e-07	-1.25205538911073	0.223534315442113	2.11125996020187	1.2397155095169	0.0286244235775798	0.747424632113261	0.691009739131385	0.747424632113261	1.25205538911073
ENSG00000174946	GPR171	2.15526017984628e-08	8.85271726584923e-07	-1.37470615942144	0.245524766772827	2.37995210585956	1.74471493976213	0.0927207386266197	0.843528298786285	0.624966540187009	0.843528298786285	1.37470615942144
ENSG00000160013	PTGIR	2.27163418609158e-08	9.28274987714954e-07	-1.46909653964309	0.262811339642465	1.65134300636457	1.63527818756579	0.0992549611027911	0.973471441418355	0.777616543805096	0.973471441418355	1.46909653964309
ENSG00000135914	HTR2B	2.4182261718018e-08	9.83123356188273e-07	-1.79903815944117	0.322462626965153	1.70974833538177	2.58589802403631	0.214574637187745	1.40037708967153	0.768752488757116	1.40037708967153	1.79903815944117
ENSG00000102524	TNFSF13B	2.74682102996559e-08	1.11386395643707e-06	-1.98085499375663	0.35647065699257	4.35755465977447	2.85531639841109	0.044701712454662	1.92884923828186	0.183255766840147	1.92884923828186	1.98085499375663
ENSG00000216490	IFI30	2.96927526073364e-08	1.19248545229789e-06	-1.57031360089149	0.28328449598116	8.06768571668881	1.83376211594662	0.000886270118118979	1.24548199568239	0.138386909500426	1.24548199568239	1.57031360089149
ENSG00000213413	PVRIG	2.97071111669581e-08	1.19248545229789e-06	-1.72992391032026	0.312082951854016	2.7475321508245	2.40748667512799	0.27757512134286	1.23508326707264	0.516708384608804	1.23508326707264	1.72992391032026
ENSG00000101335	MYL9	3.6044833896426e-08	1.4288495751062e-06	-1.08888352883866	0.197647864512571	5.12900861900551	0.888910978853593	0.0248021444524328	0.581913261118663	0.136956237633496	0.581913261118663	1.08888352883866
ENSG00000143320	CRABP2	3.67727847416862e-08	1.4504719261882e-06	-1.14725344220784	0.208376010036226	4.21938469339744	0.987359985010997	0.0336203371548099	0.640746500902173	0.196674640315678	0.640746500902173	1.14725344220784
ENSG00000101986	ABCD1	4.56202495870804e-08	1.77943279496163e-06	-1.07722601261207	0.197020358399379	3.62256052785328	0.870383775293438	0.0193066166866661	0.583562420368653	0.285240161762102	0.583562420368653	1.07722601261207
ENSG00000172159	FRMD3	4.56724069164786e-08	1.77943279496163e-06	-1.50274534794282	0.274856339311803	2.60304273298912	1.73471459079586	0.101857628698724	1.07145105766873	0.56191836031781	1.07145105766873	1.50274534794282
ENSG00000280830	ADI1	4.82227471385108e-08	1.869631191497e-06	-3.20550337059199	0.587331414574016	2.01730795356018	7.90233732465534	1.18031528396713	4.17724702913172	0.711658561313984	4.17724702913172	3.20550337059199
ENSG00000079385	CEACAM1	5.50458553382757e-08	2.12380804965347e-06	-1.385674101528	0.254991831670927	4.88772693243948	1.47786520239424	0.042854188679151	0.966987526998081	0.14745613616186	0.966987526998081	1.385674101528
ENSG00000180616	SSTR2	5.50136421404489e-08	2.12380804965347e-06	-1.3094858732617	0.240967040288379	2.84107359593647	1.30186817318777	0.057764953566667	0.844047143393937	0.487100231913461	0.844047143393937	1.3094858732617
ENSG00000133574	GIMAP4	6.54845147609713e-08	2.50226405442404e-06	-1.5996576263953	0.296060770823471	4.00609975600919	2.00645757897832	0.0298936369140946	1.33143349691673	0.221462167552568	1.33143349691673	1.5996576263953
ENSG00000007952	NOX1	6.61255730678415e-08	2.52070050236549e-06	-1.14802987591362	0.212543317745522	3.0102999785258	1.00578563559711	0.0908019321386338	0.610807923298016	0.435218855429296	0.610807923298016	1.14802987591362
ENSG00000004468	CD38	7.39532714419982e-08	2.77255000670284e-06	-1.1226297140888	0.208617148186514	5.53092379042328	1.10602778511381	0.0120350862696645	0.663893444646354	0.12573736556167	0.663893444646354	1.1226297140888
ENSG00000167286	CD3D	8.31038516518179e-08	3.05791394874375e-06	-1.13141691508754	0.211075142709582	4.52137279726638	1.25051651558057	0.0370717008442026	0.654878680485056	0.169648301609158	0.654878680485056	1.13141691508754
ENSG00000181541	MAB21L2	1.16287057798542e-07	4.14461675059557e-06	-1.84714659479378	0.348568349251393	1.28533913619756	2.91207473795129	0.146806102802835	1.7402146188835	0.817431012731407	1.7402146188835	1.84714659479378
ENSG00000125148	MT2A	1.27576921478868e-07	4.50658387517352e-06	-1.05713560849467	0.200128164299192	8.58469346583395	0.874873447468326	0.000547643401353606	0.621490753414518	0.15403323228613	0.621490753414518	1.05713560849467
ENSG00000002933	TMEM176A	1.29368660239375e-07	4.54965536098474e-06	-1.1054787705179	0.20938136462559	4.3709962770664	1.04551065814141	0.0242590864015365	0.656630703312067	0.182047332458267	0.656630703312067	1.1054787705179
ENSG00000100351	GRAP2	1.30652192667189e-07	4.57480116328051e-06	-1.1345975087967	0.214970217921386	2.70817286192025	1.15379886105556	0.120239224364551	0.597484601141429	0.529167242710693	0.597484601141429	1.1345975087967
ENSG00000120217	CD274	1.44612709343942e-07	5.00819962468694e-06	-1.68642476446667	0.320656358438174	3.33064920360586	2.29061370285507	0.0259709554369309	1.57093919779338	0.351074060488877	1.57093919779338	1.68642476446667
ENSG00000145416	MARCHF1	1.48716472085616e-07	5.13912400059337e-06	-1.11317714486238	0.21186660722104	2.22010455852955	0.959652993654195	0.0317231933126237	0.607919960535494	0.665426103699118	0.665426103699118	1.11317714486238
ENSG00000174600	CMKLR1	1.54087044204786e-07	5.31316194073595e-06	-1.79194515875539	0.341478496520656	3.32419937206718	2.85745776418433	0.129268453630569	1.68176924662732	0.352596707033489	1.68176924662732	1.79194515875539
ENSG00000125869	LAMP5	1.59246607280458e-07	5.467352201577e-06	-1.55584044180014	0.296829184614854	1.27514738641755	1.98207676482708	0.185489907165085	1.18291293647952	0.818138212463764	1.18291293647952	1.55584044180014
ENSG00000197272	IL27	1.79149714200541e-07	6.03339800197417e-06	-2.33862411536374	0.448032400241197	1.79911444619917	4.54096944029489	0.0674614867623265	3.05013292010347	0.753925105616072	3.05013292010347	2.33862411536374
ENSG00000188290	HES4	1.94748506686209e-07	6.50643496963208e-06	-1.06600592307135	0.204832483152476	6.68466090038489	0.906035236360811	0.00239836567821656	0.649227672238791	0.11915653559356	0.649227672238791	1.06600592307135
ENSG00000277734	TRAC	2.01276006879983e-07	6.66559042784209e-06	-1.15064470601394	0.221356356781141	4.91865809068753	1.27944440967427	0.020151076983039	0.740849115227522	0.145947172688429	0.740849115227522	1.15064470601394
ENSG00000169385	RNASE2	2.16771090902695e-07	7.16381135340799e-06	-2.06259925856652	0.397851185752183	2.09863566926318	3.47287551547413	0.122752648996481	2.33558811917525	0.693864218887504	2.33558811917525	2.06259925856652
ENSG00000104415	CCN4	2.26726826383645e-07	7.44638353759178e-06	-1.27089921856304	0.245538246783801	0.774260894238353	1.33957475414437	0.0911465719929185	0.84520527373476	0.825475396826769	0.84520527373476	1.27089921856304
ENSG00000087085	ACHE	2.35768694455845e-07	7.69564510692014e-06	-2.03171038935886	0.393082030739925	2.47305590060953	3.41469333240142	0.086596575544867	2.31315978765772	0.599976035750886	2.31315978765772	2.03171038935886
ENSG00000206468	UBD	2.66621708001987e-07	8.61426559024305e-06	-1.99539060390276	0.387783390235298	4.8428356392147	3.43962055510014	0.221573872183748	2.11392238816792	0.149722757421533	2.11392238816792	1.99539060390276
ENSG00000127951	FGL2	3.49572864886273e-07	1.09358117757315e-05	-1.36360129185195	0.267658895207585	5.16276225867852	1.56210559154466	0.0137706044714778	1.09889363926734	0.135756587378815	1.09889363926734	1.36360129185195
ENSG00000254017	IGHEP2	3.69322869395984e-07	1.14439694579309e-05	-1.67156890794714	0.328781964422085	1.47060162768645	2.4101417787589	0.172334430468804	1.50653430583162	0.800741170038634	1.50653430583162	1.67156890794714
ENSG00000205436	EXOC3L4	3.97605808088764e-07	1.21779227849306e-05	-1.51442133067112	0.298696514546498	3.18374322356326	1.99023162525049	0.0859870034728976	1.29968703312488	0.386884937335803	1.29968703312488	1.51442133067112
ENSG00000172889	EGFL7	4.27114157321087e-07	1.3031490680952e-05	-1.34333459533918	0.265667095338154	2.49529641827327	1.54658334323244	0.200977322554398	0.895188620362101	0.593744826512417	0.895188620362101	1.34333459533918
ENSG00000172927	MYEOV	5.46218643494889e-07	1.62597220168441e-05	-1.24088607121499	0.247715329333738	4.22519567922343	1.34742729838625	0.0566031815729451	0.896426738645863	0.196071734435469	0.896426738645863	1.24088607121499
ENSG00000186407	CD300E	6.70376635255067e-07	1.95528568697515e-05	-2.66192271101985	0.535624569202051	3.70526925618177	6.1382739190988	0.0886879774657403	4.3670716053345	0.268793463389417	4.3670716053345	2.66192271101985
ENSG00000213203	GIMAP1	7.16707357409904e-07	2.06765520025188e-05	-1.26953159016485	0.256120176868112	3.52478185478483	1.5140357705557	0.0437056998034804	0.975092938844371	0.30622631701147	0.975092938844371	1.26953159016485
ENSG00000187583	PLEKHN1	7.33167299524764e-07	2.09235680309617e-05	-1.41457754456238	0.285636741590326	3.41022897477472	1.7116268609789	0.116498829294503	1.15065374512491	0.332369485031396	1.15065374512491	1.41457754456238
ENSG00000197629	MPEG1	7.51404224957924e-07	2.13673015383384e-05	-1.11821918299562	0.226013194684484	5.32448624758386	1.14520736157361	0.00954300031511801	0.783813451640503	0.130764512909269	0.783813451640503	1.11821918299562
ENSG00000164181	ELOVL7	7.92439023578215e-07	2.24158790867257e-05	-1.01020397167328	0.204609859759556	2.42410021292612	0.712104964986028	0.0369566426536078	0.425811035458287	0.613253717791998	0.613253717791998	1.01020397167328
ENSG00000112799	LY86	7.92509061823089e-07	2.24158790867257e-05	-1.35410608575167	0.274265823196034	3.66040156295615	1.77263298868936	0.072448421779927	1.09582408166028	0.277551512177832	1.09582408166028	1.35410608575167
ENSG00000134028	ADAMDEC1	8.20191740886201e-07	2.3116609775048e-05	-1.38627139191911	0.281162403301931	4.23373918729077	1.73279330118036	0.0817745758621928	1.14599046622837	0.195191742267791	1.14599046622837	1.38627139191911
ENSG00000198829	SUCNR1	8.34436131579563e-07	2.3476454420511e-05	-1.7384612842431	0.352834026040205	1.65760345646716	2.75484251257564	0.163919579309869	1.76956935286333	0.776698258001581	1.76956935286333	1.7384612842431
ENSG00000187688	TRPV2	8.59867896440961e-07	2.40641902849041e-05	-1.49709006872099	0.304208408804977	3.07778735226736	1.97683672930681	0.0712278428380734	1.36605816868033	0.415688608104849	1.36605816868033	1.49709006872099
ENSG00000226560	C2	8.67138561521224e-07	2.42250168259075e-05	-1.17746383332878	0.239340563636009	2.72577501140303	1.21008583102288	0.149435506253688	0.740243594397354	0.523601558632615	0.740243594397354	1.17746383332878
ENSG00000159871	LYPD5	9.06609500973252e-07	2.52832712762646e-05	-1.04077163529474	0.211931088824962	3.27409269767213	1.00194428123875	0.0816494374354132	0.615924278942863	0.364416289470632	0.615924278942863	1.04077163529474
ENSG00000163568	AIM2	9.17635938625043e-07	2.55459560076772e-05	-1.78297233116596	0.363239887276782	3.99073295224029	2.8022168240317	0.0946038127873828	1.954612641047	0.223465604456332	1.954612641047	1.78297233116596
ENSG00000167157	PRRX2	1.06445712371135e-06	2.92238522254156e-05	-1.06401496781883	0.218065700915793	4.46271814292227	1.08061315252198	0.0282490511085138	0.710293450736428	0.174224168903119	0.710293450736428	1.06401496781883
ENSG00000217275		1.09795183271605e-06	3.00914522980247e-05	-1.53830879857601	0.315665937841599	1.42998413088212	2.17815339614416	0.172917422416617	1.37467364014854	0.805017610606809	1.37467364014854	1.53830879857601
ENSG00000116824	CD2	1.13048262638144e-06	3.0771944626941e-05	-1.07593853801957	0.221047748547031	4.37587765795854	1.26822029505982	0.0257719096533773	0.733107835528558	0.181612509093542	0.733107835528558	1.07593853801957
ENSG00000100097	LGALS1	1.13942956212297e-06	3.08804239947011e-05	-1.07821533148612	0.221586464180779	5.82295020314515	1.05977876821118	0.00525575321764157	0.757327432092366	0.121076645217466	0.757327432092366	1.07821533148612
ENSG00000129226	CD68	1.14033775068505e-06	3.08804239947011e-05	-1.19853624376167	0.246321862099771	6.34903925364354	1.28093658648314	0.00263923215567774	0.939698731761219	0.118586241961746	0.939698731761219	1.19853624376167
ENSG00000206340	C4A	1.14355148691372e-06	3.09147864557491e-05	-1.75461611575685	0.360648044021209	4.18021827938181	3.02204355976579	0.169760299292622	1.85031673881257	0.200832276047417	1.85031673881257	1.75461611575685
ENSG00000050730	TNIP3	1.16653155858572e-06	3.12701275805711e-05	-1.53772353315153	0.316323359141549	2.8510940304866	2.08890966867058	0.079302816232065	1.47474113636423	0.483948430952161	1.47474113636423	1.53772353315153
ENSG00000171812	COL8A2	1.15931379602946e-06	3.12701275805711e-05	-1.31290112015048	0.270007172772949	2.15163263878308	1.54835928966531	0.222535172744621	0.90973840427934	0.681720482508405	0.90973840427934	1.31290112015048
ENSG00000147443	DOK2	1.19640461655767e-06	3.19631055206734e-05	-1.23234188369412	0.253765030077039	3.52542734101864	1.41837510065681	0.0489461248999996	0.951201984388036	0.306083125701109	0.951201984388036	1.23234188369412
ENSG00000206372	C2	1.25653830798947e-06	3.3293467826824e-05	-1.16304627396821	0.239976162313588	2.72312833305382	1.2079064670722	0.147702475371563	0.746708206930451	0.524439195808832	0.746708206930451	1.16304627396821
ENSG00000235017	C2	1.25653830798947e-06	3.3293467826824e-05	-1.16304627396821	0.239976162313588	2.72312833305382	1.2079064670722	0.147702475371563	0.746708206930451	0.524439195808832	0.746708206930451	1.16304627396821
ENSG00000166428	PLD4	1.27889649759773e-06	3.37696656574975e-05	-1.24086174133944	0.256217281304961	4.10032776145122	1.68825988004875	0.0393876871740762	0.980183624858802	0.209843893824314	0.980183624858802	1.24086174133944
ENSG00000179144	GIMAP7	1.34851293823117e-06	3.54313415968971e-05	-1.49297239188458	0.308946199010082	4.13348017792035	2.40079494378744	0.0720820546532149	1.41032161943735	0.20601512156738	1.41032161943735	1.49297239188458
ENSG00000282844	ACTN4	1.37419465079644e-06	3.59279575149017e-05	-1.00300899729606	0.207717739663395	6.2930781693659	0.894857935233494	0.0623041131724437	0.607808736781719	0.118634737124506	0.607808736781719	1.00300899729606
ENSG00000134363	FST	1.48513633030912e-06	3.84490669488497e-05	-1.32295424411491	0.274858154021374	2.70157154764799	1.57423423446283	0.0687039709924599	1.10462020871626	0.531250895657946	1.10462020871626	1.32295424411491
ENSG00000027869	SH2D2A	1.49286290073726e-06	3.85236179709733e-05	-1.20662645227032	0.250743793588952	3.2704895519011	1.46119636985208	0.0890897980789641	0.88738525892654	0.365272241659407	0.88738525892654	1.20662645227032
ENSG00000159261	CLDN14	1.57943186089645e-06	4.01226816235622e-05	-1.72636910656446	0.359591767286068	1.59095343184318	2.78654167357202	0.564783116796782	1.44347832600222	0.786076242121943	1.44347832600222	1.72636910656446
ENSG00000090104	RGS1	1.58175316227379e-06	4.01226816235622e-05	-1.23868071813165	0.258025165357801	4.14857504657769	1.4076335444914	0.0203531648485976	1.01365721862367	0.204314213427303	1.01365721862367	1.23868071813165
ENSG00000020577	SAMD4A	1.59424723517537e-06	4.02895930848134e-05	-1.2951275125156	0.269871977914648	3.10076064960644	1.54486598407291	0.0809552117963287	1.05018477132625	0.409238316458861	1.05018477132625	1.2951275125156
ENSG00000291230		1.66742116268388e-06	4.18922448958996e-05	-1.43193123122781	0.298938858482563	4.07352151753064	2.00522779442274	0.12952310089841	1.25840034880876	0.213035882920682	1.25840034880876	1.43193123122781
ENSG00000198821	CD247	1.78111271748787e-06	4.451661597042e-05	-1.0857467216082	0.227296072732728	3.87989934006792	1.23632290814763	0.0645656074656325	0.737822778202113	0.238930000490121	0.737822778202113	1.0857467216082
ENSG00000180340	FZD2	1.81982906748568e-06	4.52000044636757e-05	-1.6592082253634	0.347662585218382	2.45768349790542	2.7296714971942	0.0946371613150157	1.78258935611748	0.604199822189064	1.78258935611748	1.6592082253634
ENSG00000235696	C2	1.99496770941169e-06	4.90897936668857e-05	-1.08154192241029	0.227504642920728	2.71667212560004	1.13280671761393	0.183731353523239	0.620130274315435	0.526481419697132	0.620130274315435	1.08154192241029
ENSG00000239754	CFB	2.17759711310895e-06	5.27725553762637e-05	-1.11193441206736	0.234773396304186	5.30337596163908	1.13613377186166	0.0369252964281387	0.81912352784501	0.131353534096312	0.81912352784501	1.11193441206736
ENSG00000226788	RING1	2.37252056796317e-06	5.67121608245753e-05	-2.25129555191218	0.477091743659152	2.52283190228072	4.68072679759928	0.421765220641745	3.11335812588426	0.585849692188983	3.11335812588426	2.25129555191218
ENSG00000163508	EOMES	2.41330179080726e-06	5.76003682682765e-05	-1.28004619177931	0.271465344236975	2.32948812998943	1.59157323248641	0.198823294909294	0.945712973069518	0.638082506058861	0.945712973069518	1.28004619177931
ENSG00000142227	EMP3	2.58680857978564e-06	6.10994192931241e-05	-1.18051843998568	0.251111870562862	5.4145772597819	1.2836395872244	0.0103282439882713	0.969015731773254	0.128423677702551	0.969015731773254	1.18051843998568
ENSG00000169894	MUC3A	2.65432604994405e-06	6.25083953924601e-05	-1.91790524611635	0.408421042259725	2.6913556289732	3.87385362677175	0.196531143086336	2.39416804141889	0.534470668985996	2.39416804141889	1.91790524611635
ENSG00000128165	ADM2	2.76667249738163e-06	6.50577307964178e-05	-1.03735988632883	0.22130709545777	3.61423112711958	0.993798272213957	0.0509164036502443	0.709745115609914	0.286967468469232	0.709745115609914	1.03735988632883
ENSG00000162745	OLFML2B	2.81336218740029e-06	6.59604798391076e-05	-1.38767627846882	0.296259098756676	2.8131437708561	1.83045356720983	0.142676262335548	1.22047535926886	0.495914426494458	1.22047535926886	1.38767627846882
ENSG00000196839	ADA	2.84975018210019e-06	6.65353786668123e-05	-1.14404807320887	0.244383587619747	4.20373802319388	1.28078736441784	0.049394989028418	0.878171055506573	0.198315792329512	0.878171055506573	1.14404807320887
ENSG00000152766	ANKRD22	2.84444711926402e-06	6.65353786668123e-05	-1.23929296391648	0.264707551771445	4.94068092592481	1.50025724309701	0.0312287370766265	1.05703318232364	0.144896774000776	1.05703318232364	1.23929296391648
ENSG00000133561	GIMAP6	3.22744920628062e-06	7.42453438249446e-05	-1.06742230193618	0.229267838415326	4.44939655801824	1.188752825742	0.0556511235835784	0.760718887203909	0.175314735589763	0.760718887203909	1.06742230193618
ENSG00000137752	CASP1	3.3391032248715e-06	7.64818225685264e-05	-1.03153939810244	0.221894830099736	6.19601184585004	1.00122318757454	0.00807920079066317	0.756627925523528	0.118814914132385	0.756627925523528	1.03153939810244
ENSG00000198851	CD3E	3.38233599376417e-06	7.73605941825543e-05	-1.0453120745343	0.224985946083257	4.8130481213837	1.27992296181407	0.032505710034149	0.753655389951155	0.151281676647711	0.753655389951155	1.0453120745343
ENSG00000175497	DPP10	3.41840578003839e-06	7.80375285131212e-05	-1.16751335970583	0.251406228640536	3.17617777040613	1.32958889104584	0.095581865398823	0.886059467088908	0.38885790944994	0.886059467088908	1.16751335970583
ENSG00000269242		3.5192817449279e-06	8.00321925856564e-05	-1.31460270094103	0.283446438596588	4.57395204692019	1.6232457773488	0.212422809912655	1.03537086272552	0.165836850948274	1.03537086272552	1.31460270094103
ENSG00000114013	CD86	3.54605284864969e-06	8.04109216578253e-05	-1.40098346251894	0.302173411103753	3.69601793170437	2.00038170385324	0.0620276020119209	1.35609331942317	0.270566034470706	1.35609331942317	1.40098346251894
ENSG00000211829	TRDC	3.57437575441794e-06	8.09377165131447e-05	-1.52641572320849	0.329344360605747	2.87860511113929	2.47174385599151	0.097324390600231	1.58729281740116	0.475331792937357	1.58729281740116	1.52641572320849
ENSG00000186810	CXCR3	3.72158523450613e-06	8.39188808027677e-05	-1.60001654924854	0.345848255153291	3.16856924676342	2.63029475959573	0.0724267995954447	1.78525765879318	0.390855730231182	1.78525765879318	1.60001654924854
ENSG00000117009	KMO	3.88264108285668e-06	8.67826572737773e-05	-1.28101647274056	0.277422350252713	2.21139660496144	1.6278251270691	0.112105389549289	1.08321317096876	0.667534896653307	1.08321317096876	1.28101647274056
ENSG00000156234	CXCL13	4.18049408989134e-06	9.18997926780449e-05	-2.07739371197771	0.451391345102885	2.79583377379174	4.33123721375966	0.105299522432533	3.0592159637631	0.501393350710985	3.0592159637631	2.07739371197771
ENSG00000277751	LILRB2	4.26215487272476e-06	9.33212312077587e-05	-2.30334942794792	0.500927276352412	4.13910766927871	5.04764718494908	0.144302307216831	3.75287469166039	0.205377950523456	3.75287469166039	2.30334942794792
ENSG00000155367	PPM1J	4.9298879351361e-06	0.000106764984491721	-1.04350164054993	0.228449841676249	4.01672901276569	1.08303831846596	0.0245856846715877	0.785969321948537	0.220094765697376	0.785969321948537	1.04350164054993
ENSG00000278444	CDC42EP5	5.28996316554304e-06	0.000113480775275941	-2.46897526032252	0.542280707557111	3.29689307159993	6.06004467536685	0.570108099936597	3.99708188773212	0.35904074455884	3.99708188773212	2.46897526032252
ENSG00000137265	IRF4	5.38918697279269e-06	0.000115143166827302	-1.08247831711965	0.237957665753335	1.13219119688255	1.21117030714076	0.0537156568311473	0.822704379892045	0.825712102236397	0.825712102236397	1.08247831711965
ENSG00000140279	DUOX2	5.45087478833464e-06	0.000115961355823415	-1.23121464154572	0.270796512646472	7.17018919054142	1.5443119111046	0.00242691570663266	1.13647652278978	0.122656026848157	1.13647652278978	1.23121464154572
ENSG00000073861	TBX21	5.66024477236309e-06	0.000118659930598071	-1.28936015704029	0.28408146164374	2.14196763233742	1.82027985701313	0.109695703112988	1.14369525521497	0.683966283672666	1.14369525521497	1.28936015704029
ENSG00000079263	SP140	5.84520118284855e-06	0.000121351011441721	-1.39612657159324	0.30806563788071	2.77358889742061	1.96780938116415	0.075540254245275	1.39842514287741	0.5084447463556	1.39842514287741	1.39612657159324
ENSG00000250011	HMGB1P3	6.3671546095857e-06	0.000130092917318733	-1.58838134091984	0.351893262455862	2.03714135376719	2.53013917566793	0.267003819072482	1.65618831122128	0.707415794850543	1.65618831122128	1.58838134091984
ENSG00000254593	OR7E126P	6.63751103786209e-06	0.00013509587126486	-1.61682721719873	0.358896716181452	2.32387556659758	2.5702860296052	0.191908598450648	1.80859685294532	0.639522499013638	1.80859685294532	1.61682721719873
ENSG00000143333	RGS16	6.87501225087416e-06	0.000138863017458571	-1.11848377402041	0.248688907040016	3.05212947255236	1.23968553867465	0.1407183067016	0.819817584299462	0.423015543344424	0.819817584299462	1.11848377402041
ENSG00000168404	MLKL	7.07651165865998e-06	0.000141851487170314	-1.26546722119211	0.281755022786644	4.33826059657724	1.58072442386489	0.0577401092427942	1.17520602586804	0.185019152953228	1.17520602586804	1.26546722119211
ENSG00000228267	C4B	7.53291026255195e-06	0.000149305662760007	-1.87477214856801	0.41865845708252	3.88601548855003	3.91527598132136	0.202050644043241	2.52015234797437	0.238016944574019	2.52015234797437	1.87477214856801
ENSG00000177272	KCNA3	7.56835385659349e-06	0.000149821361026663	-1.19840230231531	0.26767711325662	2.28958124193287	1.52387348389331	0.0898260067170497	1.02298970788239	0.648236664637796	1.02298970788239	1.19840230231531
ENSG00000171115	GIMAP8	8.01258951052876e-06	0.000157153912069754	-1.42795957961915	0.319822717059393	3.42057990254933	2.2510739180205	0.0610346177533355	1.52758304504795	0.329958637408299	1.52758304504795	1.42795957961915
ENSG00000181381	DDX60L	8.63138169018784e-06	0.000167731593334017	-1.13058641773138	0.254127555356013	4.37638716384039	1.29325544111332	0.013210060730418	0.989797685757628	0.181567246134863	0.989797685757628	1.13058641773138
ENSG00000187796	CARD9	8.73994894360692e-06	0.000169633978519628	-1.19063776180559	0.267787262320601	2.82118755019916	1.44230366459162	0.379464549649294	0.734267200152189	0.493372124034693	0.734267200152189	1.19063776180559
ENSG00000270800	RPS10-NUDT3	8.96908739265278e-06	0.000173869040480011	-1.7318693281371	0.390004261957348	4.21785068358391	3.14091136970018	0.253920626771381	2.10840344768698	0.196834391317301	2.10840344768698	1.7318693281371
ENSG00000196126	HLA-DRB1	9.6746966905241e-06	0.000186863886503732	-2.35089768992518	0.531358086629984	5.960876219289	5.57967881754132	0.0240273523258308	4.36103081548585	0.119871121580388	4.36103081548585	2.35089768992518
ENSG00000150337	FCGR1A	9.83653372929788e-06	0.000189529139588993	-1.96818920095139	0.445217549072173	4.69915451519208	3.93335504118267	0.063821703787154	3.0147219685482	0.15771340700607	3.0147219685482	1.96818920095139
ENSG00000289746	TARP	1.00505883595284e-05	0.000192951875076164	-1.56403504004509	0.354168009944256	1.90832799395202	2.54919315083386	0.164972854316375	1.78316386511378	0.733806867186687	1.78316386511378	1.56403504004509
ENSG00000234906	APOC2	1.01112657090885e-05	0.000193415980399123	-1.35071090744166	0.305952014845841	1.95338574786392	1.90095172915483	0.220957826754344	1.23285134710204	0.72489307305932	1.23285134710204	1.35071090744166
ENSG00000291135	FCGR1BP	1.01370984545663e-05	0.000193677063742532	-1.43846246340749	0.325869528536786	4.65065675973134	2.09440861457507	0.0355186110382114	1.61373815490109	0.160714045506789	1.61373815490109	1.43846246340749
ENSG00000231543	C2	1.07467067207982e-05	0.00020312681335768	-1.01732251143995	0.231126839767791	2.78960560591893	1.07650344717467	0.153690166512084	0.675972469809954	0.503366735896545	0.675972469809954	1.01732251143995
ENSG00000128383	APOBEC3A	1.14289239406741e-05	0.000214744887660705	-2.46577547373867	0.561909627140985	4.87895650332849	6.25265889819954	0.0588843577101988	4.84492655333544	0.147891581219361	4.84492655333544	2.46577547373867
ENSG00000198788	MUC2	1.1647812236109e-05	0.000218560735590195	-1.30588370527069	0.297869643944336	8.10584586235096	1.8172053931134	0.00212769888215734	1.37588513533482	0.139358821009994	1.37588513533482	1.30588370527069
ENSG00000236490	TAPBP	1.20641535986083e-05	0.000225084255403142	-1.4960219599764	0.341836515732177	4.23192898467232	2.31911540287394	0.255771245924477	1.55906596846197	0.195377560174133	1.55906596846197	1.4960219599764
ENSG00000168995	SIGLEC7	1.23980494432296e-05	0.000229964286989006	-1.51329025711067	0.346253590991279	1.92122608369675	2.36489526950983	0.0976975702954995	1.76434387024995	0.73129100312868	1.76434387024995	1.51329025711067
ENSG00000138378	STAT4	1.24488091653019e-05	0.000230636678894685	-1.0051494231307	0.230033636246306	2.46307381552083	1.09017776383598	0.0581499981810056	0.763682780416007	0.602726821631997	0.763682780416007	1.0051494231307
ENSG00000124635	H2BC11	1.42372711027515e-05	0.000258056626510077	-1.10496623629615	0.254590559308586	3.14135305250772	1.31734442084362	0.0832996310467605	0.923366275223755	0.398111501941268	0.923366275223755	1.10496623629615
ENSG00000140968	IRF8	1.45502950798028e-05	0.000261720057422448	-1.10233049757071	0.254263374972498	4.3933997682275	1.37727515811188	0.0326687671134983	0.971411389890098	0.180069117915747	0.971411389890098	1.10233049757071
ENSG00000126264	HCST	1.52819209966665e-05	0.000271724179153256	-1.0428322368224	0.241140413436596	4.43258636448453	1.16131342150839	0.0280747309583212	0.875035520706104	0.17671408794383	0.875035520706104	1.0428322368224
ENSG00000174944	P2RY14	1.58853068811898e-05	0.000279328360822337	-1.8342182111922	0.424977092442815	2.04311972283601	3.51786902907315	0.118864693688601	2.68612849902102	0.706124490680386	2.68612849902102	1.8342182111922
ENSG00000134256	CD101	1.83335072370497e-05	0.00031437910576067	-1.20483875254604	0.2812234097829	4.29489914172603	1.53374392779191	0.236596195063841	0.991701704548591	0.189109471424206	0.991701704548591	1.20483875254604
ENSG00000080031	PTPRH	1.89494871099481e-05	0.000322629004401073	-1.02956752511077	0.240726261369708	3.29660011991369	1.21236040408889	0.0183461120177348	0.88166466923281	0.359109821227161	0.88166466923281	1.02956752511077
ENSG00000236625	C4B	2.00376982796858e-05	0.000336879405916756	-1.80507314099345	0.423281910473493	4.11130811748354	3.81684541489367	0.12299604070622	2.6596642288304	0.208561408483231	2.6596642288304	1.80507314099345
ENSG00000173917	HOXB2	2.11416648644765e-05	0.000353012504921974	-1.1253381315417	0.264631058680148	1.90831392833336	1.43164376053881	0.129532496823763	0.958100558835161	0.733809594981551	0.958100558835161	1.1253381315417
ENSG00000010327	STAB1	2.18336230233209e-05	0.000363802171466152	-1.01390149756308	0.238831202091364	4.95171078871873	1.14091053730485	0.0478166127818476	0.838079709885059	0.144377737175635	0.838079709885059	1.01390149756308
ENSG00000276452	LILRB1	2.29885481392599e-05	0.000380255942998621	-1.28173359124296	0.302746046503279	3.20176716231516	2.05225816413888	0.522547303231981	0.900953546852493	0.38223978431423	0.900953546852493	1.28173359124296
ENSG00000158714	SLAMF8	2.32528122670876e-05	0.000382636339335016	-1.24344724145191	0.293881181793571	3.00455436285449	1.75492100631119	0.0714411434591714	1.26991568689905	0.436918464700159	1.26991568689905	1.24344724145191
ENSG00000134460	IL2RA	2.33815340529193e-05	0.000384356634234959	-1.24582064983123	0.294528559184985	1.79736576775395	1.79016176255648	0.101588012500836	1.24568495389725	0.754229608985618	1.24568495389725	1.24582064983123
ENSG00000213402	PTPRCAP	2.60326861742675e-05	0.000417573743114184	-1.10396797770993	0.262496073421682	5.27412606428112	1.61707083163053	0.0332831763941246	1.03687110308414	0.132198168840223	1.03687110308414	1.10396797770993
ENSG00000130283	GDF1	2.85845418768731e-05	0.000450326935257458	-1.08854504615612	0.260139941575544	1.75004153065253	1.42359261462474	0.115031101411999	0.935998255167519	0.762253885761533	0.935998255167519	1.08854504615612
ENSG00000276053	LAIR1	2.98278073218111e-05	0.000466217133911022	-1.59110790369888	0.381124045468566	1.81198920871695	2.79988153244253	0.216136692962427	2.03983408167242	0.751665801498971	2.03983408167242	1.59110790369888
ENSG00000224103	HLA-DPA1	3.30841194967291e-05	0.000513570280606848	-1.90016585409214	0.45774691181568	5.06489814425326	4.10046919044533	0.422272474691693	2.83198278831006	0.139412606633573	2.83198278831006	1.90016585409214
ENSG00000162645	GBP2	3.46146137600261e-05	0.000531113803406732	-1.40913932282812	0.340308753510026	7.39320093824127	2.21026627075656	0.0127385149552755	1.78591292781177	0.125378531750496	1.78591292781177	1.40913932282812
ENSG00000228520	RING1	3.52089814080242e-05	0.000538155738905724	-2.25477174275435	0.545044163954217	2.56102848278202	5.67132482633878	0.572395624870206	4.04146166641474	0.574607852103085	4.04146166641474	2.25477174275435
ENSG00000231115	RING1	3.52089814080242e-05	0.000538155738905724	-2.25477174275435	0.545044163954217	2.56102848278202	5.67132482633878	0.572395624870206	4.04146166641474	0.574607852103085	4.04146166641474	2.25477174275435
ENSG00000132514	CLEC10A	3.66523604679964e-05	0.000556471749760526	-1.497045540274	0.362689020212389	2.75401989353241	2.54919391383022	0.148680550086954	1.89432518778276	0.5146511957972	1.89432518778276	1.497045540274
ENSG00000165168	CYBB	4.02863652317959e-05	0.000603005707838632	-1.1566055248793	0.281698266918342	4.51949894511526	1.50923349656571	0.0267426119212041	1.20570685143693	0.169789025477959	1.20570685143693	1.1566055248793
ENSG00000128342	LIF	4.18154269870542e-05	0.000622376430136904	-1.02930428812153	0.251220600477763	3.80587064831564	1.19637211312282	0.0300416807694053	0.950150578590695	0.250718453941332	0.950150578590695	1.02930428812153
ENSG00000124249	KCNK15	4.19375773532859e-05	0.000623027784680218	-1.06186786103465	0.259211074898094	2.84184028240511	1.30492151494324	0.103379597136722	0.940157459783998	0.486858859810672	0.940157459783998	1.06186786103465
ENSG00000092054	MYH7	4.50881071440258e-05	0.000658145593353016	-1.28759746994926	0.315608528015975	1.87414047790554	2.12453287432002	0.135473473755175	1.41155472254446	0.740334375513923	1.41155472254446	1.28759746994926
ENSG00000265531	FCGR1CP	4.67972681973758e-05	0.000679972006641212	-2.00642590067605	0.492849517022143	2.4220562273865	4.6013713326297	0.146126172136048	3.62637549560865	0.613800711745278	3.62637549560865	2.00642590067605
ENSG00000227191	TRGC2	5.53242488232515e-05	0.000790147582474759	-1.27552474038042	0.316357068206813	3.07185513406198	2.15872893682525	0.0956531898455538	1.45872199443968	0.417371355207469	1.45872199443968	1.27552474038042
ENSG00000119686	FLVCR2	5.82948465195351e-05	0.000826632364205647	-1.00986843417972	0.251235499347491	2.29643868624571	1.21263292114103	0.0839829664566326	0.896325558765402	0.646505972829901	0.896325558765402	1.00986843417972
ENSG00000134539	KLRD1	5.90082383164507e-05	0.000834515085656851	-1.03577326304166	0.257864019063193	2.88613791975665	1.36304891254307	0.0835159706128828	0.949203260430155	0.472983224244028	0.949203260430155	1.03577326304166
ENSG00000124701	APOBEC2	5.9611852546944e-05	0.000840807460591146	-1.30398031265473	0.324830396541644	1.68623914112743	1.99050419954053	0.161200557770248	1.4775546862387	0.772400182868387	1.4775546862387	1.30398031265473
ENSG00000106560	GIMAP2	6.50560005053637e-05	0.000906336708179897	-1.00360284933091	0.251297843241121	2.76947353641838	1.27029191828121	0.0520119753875759	0.928783135795083	0.509749936234895	0.928783135795083	1.00360284933091
ENSG00000167850	CD300C	6.95984468118508e-05	0.000957867454996693	-1.64422541644816	0.413365585748084	2.19830397167698	3.28997764657187	0.117684793823255	2.53612262669112	0.67068577614567	2.53612262669112	1.64422541644816
ENSG00000284971	MUC2	7.18894063048958e-05	0.000984284239985033	-1.28552063982716	0.323813260651528	6.47563400526748	2.02504665526279	0.0166618698436999	1.61184662926262	0.118627572491411	1.61184662926262	1.28552063982716
ENSG00000172116	CD8B	7.6865829744718e-05	0.00103723194365198	-1.0036414089356	0.253831471560852	2.7339541948498	1.47246638743782	0.0812954106754377	0.919376490433959	0.521011561802312	0.919376490433959	1.0036414089356
ENSG00000101000	PROCR	7.79930741523208e-05	0.00104888147777097	-1.00450822389625	0.254274675797454	2.51929818839841	1.21281407759219	0.152439534063278	0.851729878313862	0.586873337171341	0.851729878313862	1.00450822389625
ENSG00000130052	STARD8	8.08682451208587e-05	0.00108296682766737	-1.22221553696749	0.310064365729871	3.1235730150588	1.8466823066459	0.392465914481237	1.10068768359307	0.402941428239575	1.10068768359307	1.22221553696749
ENSG00000134545	KLRC1	8.24524106541458e-05	0.00109862826467586	-1.32045359147922	0.335382445632526	3.08061851189875	2.60021810362585	0.0917500223043031	1.65520379659961	0.414887957933151	1.65520379659961	1.32045359147922
ENSG00000253797	UTP14C	8.55159490567543e-05	0.00113133625248711	-2.13515721293877	0.543519469044228	2.42400267472803	5.50939766968053	1.42984879897228	3.15823118545343	0.613279830305203	3.15823118545343	2.13515721293877
ENSG00000126353	CCR7	9.12692606899309e-05	0.00119803151769376	-1.30163862525922	0.332670040998547	3.11475133568139	2.07692203850059	0.105097845919296	1.6137132683679	0.405363370590697	1.6137132683679	1.30163862525922
ENSG00000282100	HSP90AB4P	9.43632724295738e-05	0.00123253786239976	-1.19277482361161	0.305475762799446	1.32253232344583	1.79875533523044	0.188123122623429	1.26116350734744	0.814662329407848	1.26116350734744	1.19277482361161
ENSG00000136250	AOAH	9.48922634311984e-05	0.00123842973686562	-1.37590887013157	0.352499407030719	3.70490951580156	2.31568381415323	0.0518962575212305	1.87792706809068	0.268862059383758	1.87792706809068	1.37590887013157
ENSG00000103522	IL21R	9.55652269416904e-05	0.00124414811422204	-1.1523979488545	0.295366677591791	2.90543692690454	1.76423731321389	0.0589915803116854	1.29595996828998	0.46699048911504	1.29595996828998	1.1523979488545
ENSG00000134061	CD180	9.90593443991539e-05	0.00127708624377044	-1.11606904337206	0.28669462441575	2.57429943126224	1.63180893223317	0.0716196710898209	1.20493632440792	0.570632871957847	1.20493632440792	1.11606904337206
ENSG00000118557	PMFBP1	9.90198868542342e-05	0.00127708624377044	-1.40583604571303	0.361120700306345	2.13057823971124	2.50341138669592	0.33593219107372	1.68944324137583	0.686595092370207	1.68944324137583	1.40583604571303
ENSG00000275302	CCL4	0.000100785857543539	0.00129347914741945	-1.83113439902764	0.470886952563824	4.91726044148989	4.16452726436288	0.0392360835925529	3.40453348514765	0.14601448885805	3.40453348514765	1.83113439902764
ENSG00000073067	CYP2W1	0.000104894228018926	0.00133391891887108	-1.17084184403271	0.301842504763495	2.85118517936066	1.76203703230446	0.0443463672476093	1.37067032169263	0.483919790919393	1.37067032169263	1.17084184403271
ENSG00000168140	VASN	0.000105158618133215	0.00133407932469719	-1.75016572556684	0.451263196728423	3.03436137441598	4.24501051786695	0.961081524451134	2.20163742773465	0.428161555612626	2.20163742773465	1.75016572556684
ENSG00000112493	TAPBP	0.000107056484466622	0.00134953995010422	-1.50063699958479	0.387359549419845	4.13861515374021	2.79718465890564	0.244145350625487	2.08624838236726	0.205433569745183	2.08624838236726	1.50063699958479
ENSG00000136960	ENPP2	0.000117331834631466	0.00145484153143665	-1.16846614615373	0.303368869806117	4.28132366182209	1.76042369008255	0.0345101368827013	1.39485372266434	0.190427261997003	1.39485372266434	1.16846614615373
ENSG00000203811	H3C14	0.000119013647321962	0.00147110492832807	-1.71806152823606	0.446464394614963	2.47903777609219	3.76318124267968	0.342180549970491	2.75363038120979	0.598313667574268	2.75363038120979	1.71806152823606
ENSG00000085265	FCN1	0.000121378448803095	0.00149336828341641	-1.90109047770677	0.494647308507062	5.07860400818307	4.5324346575356	0.0562352505011782	3.74383889513347	0.138866841709163	3.74383889513347	1.90109047770677
ENSG00000120594	PLXDC2	0.000138654839873457	0.00167100631889953	-1.11396460473226	0.292336533213615	3.79232925731833	1.61007852787697	0.0356846725506862	1.29160878797977	0.253017912151081	1.29160878797977	1.11396460473226
ENSG00000275313	CCL4L2	0.000140757242751172	0.00169377526932069	-1.77432189285602	0.466088609269412	3.6584917445752	3.99687996256465	0.0435959919366863	3.33034706461809	0.277933126021882	3.33034706461809	1.77432189285602
ENSG00000235941	HSPA1A	0.000142114000547507	0.00170751636636672	-3.31380715226041	0.871032247739439	2.93210756108283	14.03053323752	0.275519912311844	11.5078425699342	0.458773359281061	11.5078425699342	3.31380715226041
ENSG00000179750	APOBEC3B	0.000148300263713224	0.00176318697979462	-1.15862951349106	0.305392852995391	3.62959053521198	1.72065577535766	0.045273822453815	1.40322620655753	0.283791898051245	1.40322620655753	1.15862951349106
ENSG00000147378	FATE1	0.000157441436274287	0.00185659426633239	-1.27790477893539	0.338156961560648	2.0559334668092	2.30667059841714	0.105900187992241	1.67007721237006	0.703337589943048	1.67007721237006	1.27790477893539
ENSG00000278220	CLN8	0.000160492996682035	0.00188280197435988	-1.10187259375564	0.29194517123595	2.69507343986627	1.57436166440932	0.398086859596668	0.925655183785918	0.533299641559004	0.925655183785918	1.10187259375564
ENSG00000145824	CXCL14	0.000164762694675621	0.00192578514306152	-1.12465319301465	0.298499104677024	4.29362281727768	1.80966525586981	0.0391428338474048	1.34470021160331	0.18923259838507	1.34470021160331	1.12465319301465
ENSG00000277585	MUC4	0.000173645592513676	0.00201039354595585	-1.26521504528826	0.336980825254854	6.12630338321299	2.09824317172674	0.0912589114231309	1.6723859969551	0.11902330873024	1.6723859969551	1.26521504528826
ENSG00000283085	TPBG	0.000176172050542943	0.00203411925047665	-1.02540017955435	0.273371439052623	4.1001351781775	1.38724489554674	0.405921040986498	0.754744384766727	0.209866515680119	0.754744384766727	1.02540017955435
ENSG00000186806	VSIG10L	0.000187098246298065	0.00213965016054248	-1.03137587566871	0.276076888857564	2.66210351206531	1.44447181175747	0.174710765674567	1.00904163901244	0.543649703052846	1.00904163901244	1.03137587566871
ENSG00000158406	H4C8	0.000199212498298436	0.00225547141948144	-1.01751404102917	0.273524321610897	3.44621190583058	1.45888391815438	0.0608715254450551	1.10109246403719	0.32402268806525	1.10109246403719	1.01751404102917
ENSG00000187808	SOWAHD	0.000234343391432957	0.00258151250881378	-1.03948384486708	0.282561365959656	2.43376341647793	1.56211261754672	0.123306985880227	1.1167062835598	0.610661700169599	1.1167062835598	1.03948384486708
ENSG00000276175	LILRA3	0.000238244161565417	0.00261903816891001	-1.97126592133367	0.536460696145087	1.97802974344634	5.36066944053321	0.0521436954477742	4.41753790933589	0.719871339618721	4.41753790933589	1.97126592133367
ENSG00000081985	IL12RB2	0.00025992460285737	0.00281263545746818	-1.08467532491129	0.296985996486567	2.54977373422851	1.59888451755268	0.249316680822032	1.12053237163895	0.577952315517405	1.12053237163895	1.08467532491129
ENSG00000270443		0.000267540701564179	0.00287159148687656	-1.116953894299	0.306446576008481	1.79293081892488	1.78059869632263	0.218650514735834	1.23986252533531	0.754999342824264	1.23986252533531	1.116953894299
ENSG00000248923	MTND5P11	0.000274571211300353	0.00292925098981906	-1.22733365561296	0.337348224152176	1.64399822929849	2.05878860304047	0.237264520818755	1.53022816981414	0.778684051319634	1.53022816981414	1.22733365561296
ENSG00000113088	GZMK	0.000281120958982581	0.00298709810426945	-1.28000124892334	0.35241326567056	1.7557796560985	2.36077508429662	0.0992180978167202	1.82966214936259	0.761303321150345	1.82966214936259	1.28000124892334
ENSG00000204397	CARD16	0.000287839638815254	0.00304830039880565	-1.04667987604824	0.288659237579898	5.46321597249092	1.5354609068103	0.00934193597746845	1.28476954533362	0.127260826269947	1.28476954533362	1.04667987604824
ENSG00000136286	MYO1G	0.000315770244652862	0.003272153721644	-1.2597121296399	0.349725095069739	5.10746469259459	2.35880903599959	0.0194991293763267	1.88006676583577	0.137754786333766	1.88006676583577	1.2597121296399
ENSG00000166920	C15orf48	0.000325289952876408	0.00334896961847369	-1.25446827591755	0.349017967137924	6.68122654324906	2.2277364914043	0.00363798847472127	1.88825400434275	0.119143176059461	1.88825400434275	1.25446827591755
ENSG00000206281	TAPBP	0.00033869057015447	0.00344895919485935	-1.07701306062143	0.300526470395594	6.18016774899492	1.63294181170398	0.0345417776145582	1.36816285492441	0.118855916637016	1.36816285492441	1.07701306062143
ENSG00000204103	MAFB	0.000343323422845093	0.00347609498697172	-1.01620574406598	0.283840019539831	5.54858735331928	1.46383962114961	0.00810072288721806	1.24316061565753	0.125356886113264	1.24316061565753	1.01620574406598
ENSG00000108950	FAM20A	0.000360105922392286	0.00361379024138117	-1.11664165373951	0.312984980415354	4.7771122007482	1.79819733394322	0.0636798303025184	1.4577354155186	0.153226241327199	1.4577354155186	1.11664165373951
ENSG00000278046	LILRA3	0.000365586512787454	0.00366628569766904	-1.94339336395114	0.545321744748184	2.01680173095392	5.48013960062714	0.0552608319804737	4.56329715835893	0.711766019294116	4.56329715835893	1.94339336395114
ENSG00000273884	LILRA3	0.000384164149184148	0.00380715293979502	-1.75852684133664	0.495257817049188	1.65295538972983	4.50509535011999	0.0455690670118682	3.76389119830741	0.77738077494524	3.76389119830741	1.75852684133664
ENSG00000173391	OLR1	0.000388250464217055	0.00383807797213576	-1.68514087253492	0.474962619844535	2.49585886965841	4.06116037378974	0.07008466685616	3.43355659842606	0.59358548982536	3.43355659842606	1.68514087253492
ENSG00000136842	TMOD1	0.000395469563715542	0.0038949096560237	-1.56723477674315	0.442335735862257	3.11818866688606	3.50718846092374	0.53840586710508	2.50041306798077	0.404417684227026	2.50041306798077	1.56723477674315
ENSG00000122641	INHBA	0.000437392055789504	0.00419372998068587	-1.606265475505	0.456788702537242	2.41273601044981	3.95394674353953	0.138691430599367	3.10195371835646	0.616289201969947	3.10195371835646	1.606265475505
ENSG00000262406	MMP12	0.00044458694752534	0.004245359581785	-1.47114974315863	0.418880815425025	2.75150182286745	3.39774133515621	0.11614434129678	2.60895105755047	0.515449704313308	2.60895105755047	1.47114974315863
ENSG00000130208	APOC1	0.000449083581363709	0.00427719149751799	-1.02690623651583	0.292614154868977	4.11228145768357	1.67050408733542	0.0608529369588784	1.26896268782101	0.208448415862002	1.26896268782101	1.02690623651583
ENSG00000284554		0.00049103749475644	0.00460372515382076	-1.5631027594061	0.448446021937813	2.87382591726862	4.06835587619668	0.774393376359955	2.34895998865255	0.476824394122328	2.34895998865255	1.5631027594061
ENSG00000224552	ABHD16A	0.000512484547903242	0.00476400840553797	-1.16226316304081	0.334546559649895	2.15439709192992	2.24612640550965	0.29099940093171	1.44725727531654	0.681075607203065	1.44725727531654	1.16226316304081
ENSG00000235588	AIF1	0.000514984333399336	0.00477328919167105	-1.19490078251028	0.344070315235162	3.15175995957415	2.10665174080239	0.0617320486612452	1.77690150147308	0.395317102802304	1.77690150147308	1.19490078251028
ENSG00000206428	AIF1	0.000514984333399336	0.00477328919167105	-1.19490078251028	0.344070315235162	3.15175995957415	2.10665174080239	0.0617320486612452	1.77690150147308	0.395317102802304	1.77690150147308	1.19490078251028
ENSG00000237727	AIF1	0.000514984333399336	0.00477328919167105	-1.19490078251028	0.344070315235162	3.15175995957415	2.10665174080239	0.0617320486612452	1.77690150147308	0.395317102802304	1.77690150147308	1.19490078251028
ENSG00000121797	CCRL2	0.000580439013432577	0.00524838370735168	-1.23395752565629	0.358646665367366	4.24439462550267	2.31860149376259	0.0227175908089026	1.97500124407862	0.1941048334933	1.97500124407862	1.23395752565629
ENSG00000182508	LHFPL1	0.000583139636962861	0.00526681117566002	-1.04335411373523	0.303359032799163	1.54077564807846	1.70506319146489	0.13224314996576	1.29702801428087	0.79254946641052	1.29702801428087	1.04335411373523
ENSG00000236560	PPP1R11	0.000599324672893269	0.00538240960469571	-1.4408260320544	0.419830910583598	3.16036165835039	3.29257228601257	0.340114314825518	2.39735709226102	0.393025986341004	2.39735709226102	1.4408260320544
ENSG00000276070	CCL4L2	0.000599196824871384	0.00538240960469571	-1.57929066105921	0.460169266467267	3.91975584124382	3.77246054485317	0.0356792771727504	3.25310955938775	0.233141584139763	3.25310955938775	1.57929066105921
ENSG00000276125	CCL4L2	0.000599706463891973	0.00538279726144935	-1.57841830487345	0.459945982996623	3.91928429771764	3.76865889282183	0.0355585828338402	3.25003945380716	0.233208264125754	3.25003945380716	1.57841830487345
ENSG00000282988		0.00060219558944798	0.00538836650755352	-1.41937955237942	0.413738061521105	2.43705045300865	3.05049548457809	0.259048508008312	2.39954365683016	0.609777745391746	2.39954365683016	1.41937955237942
ENSG00000170542	SERPINB9	0.000624539434881682	0.00555861078212722	-1.28167650048893	0.374679541393825	5.04849050790252	2.50541824994018	0.0193572447770744	2.16096522144589	0.140081452550789	2.16096522144589	1.28167650048893
ENSG00000125245	GPR18	0.000639643081824023	0.00566133988233556	-1.25967750692227	0.368950030275646	2.31113886348327	2.52211272893542	0.134859050172776	1.97929130525201	0.642775980996473	1.97929130525201	1.25967750692227
ENSG00000271605	MILR1	0.000668721039540138	0.005859972240645	-1.21236758032463	0.356359426417331	2.87445097880809	2.24175827384411	0.156644680747487	1.81567483646372	0.476629070589175	1.81567483646372	1.21236758032463
ENSG00000187243	MAGED4B	0.000674883169981841	0.00590420631262045	-1.10806349482497	0.325940857484221	3.46528916556149	1.91947902682414	0.211558981424275	1.43841986874709	0.319641194949245	1.43841986874709	1.10806349482497
ENSG00000281165	SLC2A6	0.000873647477373163	0.00726121003134122	-1.04449066680898	0.313817170727548	2.74314840451983	1.74800435572665	0.0719506762404237	1.45756585445178	0.518098091356088	1.45756585445178	1.04449066680898
ENSG00000160326	SLC2A6	0.000873647477373163	0.00726121003134122	-1.04449066680898	0.313817170727548	2.74314840451983	1.74800435572665	0.0719506762404237	1.45756585445178	0.518098091356088	1.45756585445178	1.04449066680898
ENSG00000206299	TAP2	0.000919872745728804	0.00757239625380894	-1.30981595800194	0.395242879519896	4.04772884306636	2.88401928792579	0.345799825576165	2.08041291612189	0.216190876256756	2.08041291612189	1.30981595800194
ENSG00000230708	HLA-DPB1	0.00092729732444864	0.00760591125199495	-1.24889184636921	0.377114619210503	6.33396255173885	2.61464584987426	0.00457037080013951	2.20418443269936	0.118595281806041	2.20418443269936	1.24889184636921
ENSG00000123685	BATF3	0.000944496786442623	0.00770634532383257	-1.14207078763502	0.345395625422472	3.20053926955968	2.09992950806194	0.0850528161936785	1.76777232614496	0.382553740008729	1.76777232614496	1.14207078763502
ENSG00000204642	HLA-F	0.00101513841910386	0.00813578851183821	-1.86764897075899	0.568314080271722	4.1380076624925	5.71639485971499	0.131991075562203	4.88424078118962	0.205502211479836	4.88424078118962	1.86764897075899
ENSG00000235833		0.00102552190498684	0.00819592569214221	-1.19039363166607	0.362545786630978	1.57996800716508	2.34137067277869	0.13868440114022	1.90270800282598	0.787536886422705	1.90270800282598	1.19039363166607
ENSG00000169508	GPR183	0.00103098481062505	0.00822756010624775	-1.18457182160893	0.360937349691101	3.94790316961898	2.29032342048947	0.0518024531305048	1.97151682713392	0.229219527045173	1.97151682713392	1.18457182160893
ENSG00000116774	OLFML3	0.00106955752646619	0.00849235086948378	-1.04536276568572	0.319530330808888	2.87870877411539	1.85817416690041	0.120253724969653	1.46546059409995	0.47529943922637	1.46546059409995	1.04536276568572
ENSG00000163823	CCR1	0.00118561126636399	0.00916211798255812	-1.4904137541726	0.459675200862106	5.11778668133049	3.69171610209854	0.0425491977796777	3.2391813440111	0.137368904559504	3.2391813440111	1.4904137541726
ENSG00000110079	MS4A4A	0.00127654926316106	0.00971840377739853	-1.03729350039188	0.32202080742463	4.11413368912747	1.81218765656697	0.0678695466320044	1.54265978606191	0.208233704562776	1.54265978606191	1.03729350039188
ENSG00000120280	TASL	0.00133240143670041	0.0100760481626021	-1.16466332465525	0.362946941561017	3.10712178047637	2.30705937975745	0.121190810772482	1.92472167159201	0.407471400665723	1.92472167159201	1.16466332465525
ENSG00000267120		0.00141960376502975	0.0105844378278203	-1.43554971844603	0.44992598792106	2.03558439004393	3.5829270851781	0.396664810317993	2.74733801548141	0.707751153559419	2.74733801548141	1.43554971844603
ENSG00000174004	NRROS	0.00142915811019927	0.0106302244639957	-1.19134776827812	0.373615910583723	2.52409734349222	2.43799269999974	0.124001292055312	2.04395985600979	0.58548240434016	2.04395985600979	1.19134776827812
ENSG00000138166	DUSP5	0.00160050400653422	0.0116490896006721	-1.00759667231953	0.319282564885447	5.51989062859606	1.7817205315782	0.00608637667312363	1.57716974915768	0.12597893839931	1.57716974915768	1.00759667231953
ENSG00000282604	CCL4L2	0.00160935927592996	0.0116867862266709	-1.45061799752282	0.459899703042561	3.83209000256975	3.66427543322264	0.102563717172727	3.18237315628047	0.24639001855396	3.18237315628047	1.45061799752282
ENSG00000105246	EBI3	0.00164526143872242	0.0118554287533688	-1.06423072507841	0.338091335205065	2.26371759997741	2.0293389551914	0.0800005936751002	1.69528754324998	0.654709957292609	1.69528754324998	1.06423072507841
ENSG00000011600	TYROBP	0.00176164385217842	0.012473537048654	-1.11126186798176	0.355293879182456	6.35307874868948	2.19209893014996	0.00497939977207936	1.95556292023373	0.118584324287131	1.95556292023373	1.11126186798176
ENSG00000248871	TNFSF12-TNFSF13	0.00181503984754761	0.0127832846329716	-1.85279465889699	0.594046595321116	2.2801097927118	6.24081683972872	1.0109810584099	4.46979165234167	0.650617236255432	4.46979165234167	1.85279465889699
ENSG00000196358	NTNG2	0.00191824929030306	0.0133329648966583	-1.22635855151916	0.395267271224016	2.10270263869838	2.72083183522694	0.139920402883097	2.28659180677489	0.692947283867159	2.28659180677489	1.22635855151916
ENSG00000148965	SAA4	0.0019535962787889	0.0135254209266674	-1.39085976565896	0.449070405572973	4.245666270589	3.47009472683762	0.134106336039684	2.99795054409139	0.193975900494235	2.99795054409139	1.39085976565896
ENSG00000215559	ANKRD20A11P	0.00196978060249572	0.0136208310101213	-1.1507733737416	0.371846814955894	1.98536554518642	2.45897505253222	0.190926424411896	1.95655245718592	0.718356846533435	1.95655245718592	1.1507733737416
ENSG00000225130	TRIM31	0.0021225099542488	0.0144645464524325	-1.2235827968977	0.39823271244605	2.29330997273592	3.03937131296601	0.120848332798518	2.34220963807783	0.647296341165384	2.34220963807783	1.2235827968977
ENSG00000082074	FYB1	0.00216967585785607	0.014682489330132	-1.02778389804949	0.335223454336537	4.11980353835282	1.92469182936523	0.015752991330984	1.72954489942182	0.207578968963938	1.72954489942182	1.02778389804949
ENSG00000291221		0.00222030424678606	0.0149424031782012	-1.4466740487965	0.472914101686901	2.93121439208385	3.82985261666246	0.275973073119217	3.19751089291978	0.459047217302194	3.19751089291978	1.4466740487965
ENSG00000239732	TLR9	0.00225389353343873	0.0150854280452809	-1.24171710328351	0.40651231370264	1.7636777660592	2.88933542260656	0.149302155032042	2.41723869247144	0.759984782073569	2.41723869247144	1.24171710328351
ENSG00000134339	SAA2	0.00244802452496812	0.0161200488189284	-1.20535276876139	0.397846506630891	6.98622296989327	2.71402457152552	0.00576595021870185	2.45251699328189	0.120948209537414	2.45251699328189	1.20535276876139
ENSG00000234518	PTGES3P1	0.00248422180752797	0.016301131481917	-1.12032011015395	0.370322329464718	1.89432108100667	2.35466318143393	0.139751827292585	1.99015482103097	0.736506131806615	1.99015482103097	1.12032011015395
ENSG00000143382	ADAMTSL4	0.00251495251607918	0.0164517223027139	-1.27956960695465	0.423483076714241	4.05885466002432	3.0645040202741	0.0668553138608983	2.71845052266042	0.214819733325898	2.71845052266042	1.27956960695465
ENSG00000122877	EGR2	0.0026905229763152	0.0173011946729395	-1.4071433140418	0.468884000686756	4.0885887949828	3.78797236419456	0.168555003555961	3.24598022458406	0.211230975441853	3.24598022458406	1.4071433140418
ENSG00000275841	LILRA3	0.00289673064095142	0.0183087197886933	-1.71410887002385	0.575496048186243	2.91072060830995	5.85786473139191	0.105851436877864	5.0379649940141	0.465356348759558	5.0379649940141	1.71410887002385
ENSG00000278466	MUC2	0.00292967990798343	0.0184729043305453	-1.57384635869927	0.529020158675254	1.84103357227623	4.87207022456745	0.465302883267171	3.88125245001419	0.74645743081547	3.88125245001419	1.57384635869927
ENSG00000206394	CLIC1	0.00301290254500565	0.0188927411658421	-1.02118980570802	0.344250086089004	5.2084972573275	2.02858960331112	0.111933378915895	1.72862198229841	0.134224972820756	1.72862198229841	1.02118980570802
ENSG00000291316		0.00302334743863732	0.0189134714225025	-1.19202129660765	0.401982788054295	3.60343555597831	2.79958687278893	0.728753948228712	1.78091065822853	0.28922414451032	1.78091065822853	1.19202129660765
ENSG00000167208	SNX20	0.00320662953329843	0.0197874934244223	-1.0730771329334	0.364100216342203	4.49050128873553	2.27950772649986	0.0388049543586418	2.02013008138556	0.172011882555247	2.02013008138556	1.0730771329334
ENSG00000226651	CLIC1	0.00326893613526783	0.0201173088680671	-1.08978568398625	0.370518230354813	5.17714699834326	2.3444969686711	0.100895777269507	2.0312649126714	0.135263584145438	2.0312649126714	1.08978568398625
ENSG00000223639	CLIC1	0.00341648094942395	0.0208717836940981	-1.08530858908097	0.370722935312997	5.17569197383882	2.3441476397412	0.100460292040156	2.03405701303329	0.13531297096525	2.03405701303329	1.08530858908097
ENSG00000226417	CLIC1	0.00341648094942395	0.0208717836940981	-1.08530858908097	0.370722935312997	5.17569197383882	2.3441476397412	0.100460292040156	2.03405701303329	0.13531297096525	2.03405701303329	1.08530858908097
ENSG00000226248	CLIC1	0.00341648094942395	0.0208717836940981	-1.08530858908097	0.370722935312997	5.17569197383882	2.3441476397412	0.100460292040156	2.03405701303329	0.13531297096525	2.03405701303329	1.08530858908097
ENSG00000228978	TNF	0.00346187857097162	0.0211166622272313	-1.49578027245489	0.511650896095228	2.54761078734285	4.55093788662025	0.517236394612345	3.54858454301016	0.578592121694358	3.54858454301016	1.49578027245489
ENSG00000126262	FFAR2	0.003517428111191	0.0214226196381196	-1.45425236878139	0.498291073908041	6.05917616248511	4.20195276058343	0.145813013157857	3.71045300134663	0.119300668688709	3.71045300134663	1.45425236878139
ENSG00000160683	CXCR5	0.00365765445941604	0.0221095113138301	-1.36011518801524	0.467993370098648	4.10327674771516	3.71008579131101	0.558522111874291	2.84305382873881	0.209498045014831	2.84305382873881	1.36011518801524
ENSG00000204472	AIF1	0.00366742059426439	0.0221578554794476	-1.02586512076031	0.353084764680463	5.23168226277595	2.11191610842394	0.0381594875877253	1.89807845749096	0.13348703026377	1.89807845749096	1.02586512076031
ENSG00000274847	MAFIP	0.00371201496946084	0.0223847458097684	-1.18001626030454	0.406670597217024	2.07304673205527	2.83010507139343	0.68295914455774	1.88558075773652	0.699575139496317	1.88558075773652	1.18001626030454
ENSG00000284881	DEFB1	0.00381349811918417	0.0229098133418562	-1.59450583845596	0.551123677306997	2.89037543634153	5.28427242428563	0.146316502274576	4.57104228888799	0.471664312488831	4.57104228888799	1.59450583845596
ENSG00000235985	AIF1	0.00383052084798626	0.0229773431696564	-1.05980641716641	0.366487841190285	2.8240551534975	2.28163442984583	0.0920667000546098	1.9939602334879	0.492466474562768	1.9939602334879	1.05980641716641
ENSG00000278167	CCL18	0.00388425459566002	0.0232195261413261	-1.3311116190319	0.461005114548494	2.43216011787606	3.74176302867501	0.159418963200846	3.14132818785512	0.611092448149356	3.14132818785512	1.3311116190319
ENSG00000110848	CD69	0.00392470465880295	0.0233922404410693	-1.27382225439435	0.441662810741221	3.81661770077564	3.32216328138386	0.0387661889386682	2.9908138717664	0.248924350886788	2.9908138717664	1.27382225439435
ENSG00000239836	PSMB9	0.00404506050273868	0.0239390475620008	-1.22657340049196	0.426689700061939	4.97494955745094	3.29199599823008	0.0216400696090519	2.8060062603133	0.143298711508213	2.8060062603133	1.22657340049196
ENSG00000243594	PSMB9	0.00404506050273868	0.0239390475620008	-1.22657340049196	0.426689700061939	4.97494955745094	3.29199599823008	0.0216400696090519	2.8060062603133	0.143298711508213	2.8060062603133	1.22657340049196
ENSG00000290908		0.00409010643088231	0.0241516834417925	-1.43498292750261	0.499797719213778	2.22522033507892	4.28871110297921	0.99902915664894	2.88059191702245	0.664182374330609	2.88059191702245	1.43498292750261
ENSG00000170439	METTL7B	0.00443906123450939	0.0258284470657984	-1.20447851828971	0.423344575269115	1.70043509126082	3.1708297319341	0.168986314880997	2.61449793385449	0.770210306785184	2.61449793385449	1.20447851828971
ENSG00000148826	NKX6-2	0.00446602528549002	0.0259473457376277	-1.07021912630372	0.376410965102812	3.6542392122929	2.40437521739604	0.885091467427583	1.3154284423324	0.278785361203074	1.3154284423324	1.07021912630372
ENSG00000171860	C3AR1	0.00448394442639559	0.0260324253476933	-1.04288879576228	0.366963246786202	4.22831817817133	2.28853121007801	0.0370854942521332	2.05435691006454	0.19574922972284	2.05435691006454	1.04288879576228
ENSG00000273793	DUSP8	0.00450243387398461	0.0261302259440889	-1.07702846236432	0.379151097487317	3.70050517200505	2.45619106950814	0.20668762767668	2.02598683376981	0.269704064263925	2.02598683376981	1.07702846236432
ENSG00000158869	FCER1G	0.00505377950358942	0.0285280110046369	-1.23377560874636	0.440070584278015	6.29089381321429	3.26806713859032	0.00703064978213197	3.00074507334227	0.118637459455805	3.00074507334227	1.23377560874636
ENSG00000274110	LAIR1	0.00519512684954299	0.0291549716783763	-1.19809895770878	0.428707178953563	2.9428340253681	3.20140826078391	0.198934426582807	2.65551453454818	0.455492126468577	2.65551453454818	1.19809895770878
ENSG00000237508	HLA-F	0.00535180411645485	0.0296832792167363	-1.05905452202435	0.38026291490792	4.23426248751869	2.49533028619683	0.0900333091398121	2.15575447808601	0.195138088761592	2.15575447808601	1.05905452202435
ENSG00000206509	HLA-F	0.00535180411645485	0.0296832792167363	-1.05905452202435	0.38026291490792	4.23426248751869	2.49533028619683	0.0900333091398121	2.15575447808601	0.195138088761592	2.15575447808601	1.05905452202435
ENSG00000135074	ADAM19	0.00541032721427862	0.0299411219633586	-1.03970334385252	0.37378824394409	3.47633977785734	2.40929045632561	0.067515647219229	2.10244594132493	0.317119345204235	2.10244594132493	1.03970334385252
ENSG00000173432	SAA1	0.00559790941146544	0.0306525552892369	-1.00419250733734	0.362465638834178	7.08004392843728	2.1924177562417	0.00165977054771821	2.03883015420242	0.121759693019376	2.03883015420242	1.00419250733734
ENSG00000124216	SNAI1	0.00561715459443755	0.0307293533293799	-1.21527836839343	0.4388346467828	1.89601735359673	3.2270628531976	0.161110241531675	2.82979453980202	0.736181075099005	2.82979453980202	1.21527836839343
ENSG00000137403	HLA-F	0.00590766871107091	0.0319090390184109	-1.1880761926386	0.431578458946416	4.72059183053947	3.21069109581514	0.101929455645901	2.79088307307368	0.156440229792039	2.79088307307368	1.1880761926386
ENSG00000165178	NCF1C	0.00642028705439867	0.0340303044403872	-1.13667547494957	0.417051063882776	5.00338182267256	2.91423032842558	0.0466063055529579	2.65473361496225	0.142011341628448	2.65473361496225	1.13667547494957
ENSG00000275183	LENG9	0.00667616429892138	0.0349553055651035	-1.09198246247394	0.402562291256301	3.97914725489328	2.71360189495512	0.415661555685102	2.10124419158262	0.224997139355991	2.10124419158262	1.09198246247394
ENSG00000268173		0.0072633024777467	0.0372443407052457	-1.42948656837092	0.532491501915623	1.50859218310691	4.72846541573952	0.937206493996689	3.46657875379101	0.796431944457391	3.46657875379101	1.42948656837092
ENSG00000281948	CES1P1	0.0074429822500106	0.0379210403353104	-2.18468800397671	0.816295137082103	3.69519790228342	11.1055587288632	0.646028370905103	9.70289541015844	0.270724003682348	9.70289541015844	2.18468800397671
ENSG00000243067	PSMB9	0.00762028108812432	0.0386139586155002	-1.27036310340066	0.476068337071891	4.89658227399193	4.04778720317033	0.0165901915065156	3.50338307860837	0.147019943370412	3.50338307860837	1.27036310340066
ENSG00000240118	PSMB9	0.00764012218739799	0.0386775102837193	-1.26966258730203	0.475961649631868	4.89817844884966	4.04666013842643	0.0149959787584936	3.50339980834071	0.146941683884997	3.50339980834071	1.26966258730203
ENSG00000234794	HLA-DRA	0.010500528520107	0.0492960429284173	-2.40242891022653	0.938853838104243	4.20475895495337	15.1887543045712	0.0967557087670757	13.5930328973393	0.198207912622564	13.5930328973393	2.40242891022653
ENSG00000230726	HLA-DRA	0.010500528520107	0.0492960429284173	-2.40242891022653	0.938853838104243	4.20475895495337	15.1887543045712	0.0967557087670757	13.5930328973393	0.198207912622564	13.5930328973393	2.40242891022653
ENSG00000206308	HLA-DRA	0.010500528520107	0.0492960429284173	-2.40242891022653	0.938853838104243	4.20475895495337	15.1887543045712	0.0967557087670757	13.5930328973393	0.198207912622564	13.5930328973393	2.40242891022653
