# Supplementary material for: Upper Airway Epithelial Tissue Transcriptome Analysis Reveals Immune Signatures Associated with COVID-19 Severity in Ghanaians
Source: J Immunol Res. 2024 Feb 12;2024:6668017. doi: 10.1155/2024/6668017 (PMC10876312; doi:10.1155/2024/6668017)
Supplement: Supplementary 3 — Down sars-CoV-2-infected vs uninfected control Ghanaians. [file 6668017.f3.txt]

target_id	ext_gene	pval	qval	se_b	mean_obs	var_obs	tech_var	sigma_sq	smooth_sigma_sq	final_sigma_sq	bflip
ENSG00000121691	CAT	4.51E-15	6.34E-13	0.097032566	4.989009245	0.269639903	0.003574185	0.12204891	0.142655585	0.142655585	-0.760726503
ENSG00000124713	GNMT	6.58E-14	7.58E-12	0.200950048	3.734742822	1.198832337	0.068932603	0.558225444	0.263266185	0.558225444	-1.506329969
ENSG00000088812	ATRN	8.16E-14	9.13E-12	0.113545726	5.943626521	0.388424663	0.005207365	0.195028723	0.119994128	0.195028723	-0.847929307
ENSG00000226887	ERVMER34-1	1.41E-13	1.47E-11	0.177594052	5.156640895	0.927061664	0.102321237	0.387522549	0.135969631	0.387522549	-1.313404237
ENSG00000115112	TFCP2L1	7.03E-13	6.69E-11	0.131046985	5.405932466	0.473510869	0.004849189	0.261870354	0.128637194	0.261870354	-0.940764131
ENSG00000272325	NUDT3	1.08E-12	1.01E-10	0.088396508	6.681087903	0.210732423	0.00221608	0.100396539	0.11914264	0.11914264	-0.62933161
ENSG00000243660	ZNF487	1.29E-12	1.18E-10	0.109716276	5.776007817	0.341067623	0.010543204	0.176414292	0.121614419	0.176414292	-0.778507856
ENSG00000168118	RAB4A	4.73E-12	4.00E-10	0.099268061	4.986453803	0.216955225	0.010273578	0.080369271	0.142771671	0.142771671	-0.686270326
ENSG00000196205	EEF1A1P5	9.52E-12	7.63E-10	0.127991487	4.333739283	0.455934493	0.030659622	0.223767226	0.185437355	0.223767226	-0.87207062
ENSG00000163738	MTHFD2L	9.55E-12	7.63E-10	0.108513105	4.668448726	0.327904064	0.022326485	0.160553066	0.159593133	0.160553066	-0.739308029
ENSG00000103942	HOMER2	1.01E-11	7.99E-10	0.115484251	5.161756245	0.363266858	0.005827089	0.201304479	0.135791465	0.201304479	-0.785955
ENSG00000183723	CMTM4	2.67E-11	1.93E-09	0.116545829	6.075733063	0.35988507	0.004442999	0.206514147	0.119224522	0.206514147	-0.776600802
ENSG00000144749	LRIG1	3.26E-11	2.30E-09	0.17564689	3.772268757	0.817866602	0.014121519	0.46503974	0.256502779	0.46503974	-1.165299365
ENSG00000119138	KLF9	3.83E-11	2.68E-09	0.138180777	4.904939575	0.521037911	0.011574448	0.284974258	0.146611404	0.284974258	-0.91343527
ENSG00000111058	ACSS3	3.87E-11	2.70E-09	0.14700027	3.786075566	0.610636073	0.057384381	0.278227275	0.254094321	0.278227275	-0.97151201
ENSG00000204634	TBC1D8	4.19E-11	2.89E-09	0.105660884	4.588319495	0.290264582	0.00327242	0.170119657	0.164839492	0.170119657	-0.697081019
ENSG00000155729	KCTD18	6.03E-11	4.01E-09	0.100194438	4.988334414	0.207723036	0.013228839	0.08953139	0.142686195	0.142686195	-0.655582565
ENSG00000143158	MPC2	6.51E-11	4.29E-09	0.088673553	6.935176684	0.197407105	0.001562632	0.107060239	0.120557984	0.120557984	-0.579178623
ENSG00000179195	ZNF664	8.84E-11	5.69E-09	0.100739215	4.738637749	0.236524922	0.002222916	0.124154717	0.15539221	0.15539221	-0.653350102
ENSG00000164746	C7orf57	2.18E-10	1.32E-08	0.135909977	5.145519056	0.495007405	0.010190442	0.276691654	0.136361775	0.276691654	-0.862793725
ENSG00000116171	SCP2	7.40E-10	4.11E-08	0.088323463	6.62319585	0.166756177	0.002217123	0.08591681	0.118941113	0.118941113	-0.543836541
ENSG00000134709	HOOK1	9.25E-10	5.02E-08	0.11361888	4.323712978	0.280458981	0.014122618	0.133391758	0.186371566	0.186371566	-0.695565384
ENSG00000124215	CDH26	9.59E-10	5.18E-08	0.130380797	5.423728696	0.423385603	0.01562845	0.248386203	0.128199986	0.248386203	-0.7974247
ENSG00000165389	SPTSSA	1.42E-09	7.43E-08	0.100258178	5.747293862	0.261226001	0.004140052	0.151973422	0.121979126	0.151973422	-0.606826197
ENSG00000250722	SELENOP	2.15E-09	1.09E-07	0.120331616	5.137290911	0.355263511	0.004466996	0.22041789	0.136656168	0.22041789	-0.72034737
ENSG00000227877	MRLN	2.16E-09	1.09E-07	0.224986361	4.319571634	1.29102704	0.07025305	0.715910948	0.186760202	0.715910948	-1.346667183
ENSG00000155850	SLC26A2	2.47E-09	1.24E-07	0.144662964	4.511158791	0.558246433	0.004501816	0.320522227	0.170419604	0.320522227	-0.862660563
ENSG00000118965	WDR35	3.76E-09	1.84E-07	0.106641171	4.563652384	0.258919714	0.010061175	0.144718269	0.166563177	0.166563177	-0.628602165
ENSG00000164120	HPGD	4.18E-09	2.03E-07	0.192211467	4.664186379	0.943520233	0.010854489	0.562943939	0.159859493	0.562943939	-1.129642588
ENSG00000124942	AHNAK	4.39E-09	2.12E-07	0.112669995	5.429873483	0.31260596	0.004062093	0.19309723	0.128051105	0.19309723	-0.661226972
ENSG00000162873	KLHDC8A	5.76E-09	2.73E-07	0.288059016	2.018547274	1.988607466	0.041128315	1.247606957	0.71139531	1.247606957	-1.677511214
ENSG00000182712	CMC4	6.11E-09	2.88E-07	0.115051145	4.435542906	0.27589437	0.029114589	0.137077742	0.176466263	0.176466263	-0.668863837
ENSG00000117054	ACADM	6.18E-09	2.90E-07	0.099024954	5.985362984	0.234609406	0.006240764	0.146055785	0.119708831	0.146055785	-0.575501491
ENSG00000198589	LRBA	6.64E-09	3.10E-07	0.093585669	5.881312857	0.207556236	0.007599313	0.128425917	0.120502301	0.128425917	-0.542767307
ENSG00000152102	FAM168B	7.18E-09	3.32E-07	0.088614035	6.128188932	0.14560979	0.002940067	0.070964101	0.119016669	0.119016669	-0.512784032
ENSG00000126351	THRA	8.21E-09	3.78E-07	0.095847334	5.078777198	0.203456899	0.00381924	0.113078258	0.138860019	0.138860019	-0.552470201
ENSG00000176387	HSD11B2	1.03E-08	4.64E-07	0.209314632	3.898027037	1.045268809	0.014860243	0.665595596	0.236251548	0.665595596	-1.19842804
ENSG00000156284	CLDN8	1.32E-08	5.79E-07	0.27124006	3.989371962	1.743760459	0.043328201	1.099309196	0.223644572	1.099309196	-1.541601473
ENSG00000180354	MTURN	1.35E-08	5.89E-07	0.127108533	5.91083693	0.41073297	0.013084936	0.237843673	0.120248687	0.237843673	-0.721875532
ENSG00000132141	CCT6B	1.43E-08	6.19E-07	0.120660943	4.723594512	0.353155575	0.015107442	0.211010072	0.15626437	0.211010072	-0.684122831
ENSG00000039139	DNAH5	2.09E-08	8.64E-07	0.177572059	6.348281325	0.740512501	0.004547655	0.485174817	0.118586626	0.485174817	-0.995185586
ENSG00000148735	PLEKHS1	2.80E-08	1.13E-06	0.119243026	7.01551802	0.337636097	0.002021005	0.218813406	0.121188421	0.218813406	-0.66224927
ENSG00000136044	APPL2	3.18E-08	1.27E-06	0.104071214	4.638531536	0.243680563	0.006722097	0.145806729	0.161491854	0.161491854	-0.57564249
ENSG00000095203	EPB41L4B	3.25E-08	1.30E-06	0.097250301	6.666609579	0.212878008	0.002118303	0.144768464	0.11908807	0.144768464	-0.537522836
ENSG00000040341	STAU2	3.38E-08	1.34E-06	0.106464768	4.712165213	0.227234526	0.019103532	0.122673929	0.15693697	0.15693697	-0.587744922
ENSG00000071794	HLTF	6.20E-08	2.38E-06	0.27308083	2.531317761	1.661810855	0.156971469	1.001227568	0.583379633	1.001227568	-1.478137348
ENSG00000125868	DSTN	6.25E-08	2.39E-06	0.094680124	8.076057375	0.178218258	0.000627584	0.113376009	0.138597793	0.138597793	-0.512359269
ENSG00000166669	ATF7IP2	6.69E-08	2.54E-06	0.150649871	5.384650492	0.552512799	0.010729491	0.34175361	0.129172327	0.34175361	-0.813397615
ENSG00000050438	SLC4A8	6.92E-08	2.62E-06	0.137453481	3.824814133	0.411282993	0.045860628	0.233118266	0.247574602	0.247574602	-0.741314057
ENSG00000110429	FBXO3	7.19E-08	2.72E-06	0.102044766	4.811586032	0.200411872	0.010367494	0.113956599	0.151359396	0.151359396	-0.549637705
ENSG00000218226	TATDN2P2	7.25E-08	2.72E-06	0.291849876	1.49945108	1.914454771	0.175683694	1.14719431	0.797495985	1.14719431	-1.571593803
ENSG00000185787	MORF4L1	7.50E-08	2.81E-06	0.08836751	6.887876723	0.162751211	0.001050786	0.097652882	0.120228324	0.120228324	-0.475302204
ENSG00000253729	PRKDC	7.84E-08	2.92E-06	0.095426981	5.175553794	0.200710829	0.006112854	0.128741363	0.135317667	0.135317667	-0.512508579
ENSG00000057294	PKP2	8.02E-08	2.97E-06	0.093663875	5.426118992	0.148800561	0.008110718	0.080157543	0.128141947	0.128141947	-0.50267236
ENSG00000267385		8.34E-08	3.06E-06	0.256550661	1.685012643	1.646442723	0.249638741	0.765334626	0.77258755	0.77258755	-1.374998007
ENSG00000290533		8.43E-08	3.09E-06	0.382622817	2.572850173	3.280560612	0.189270102	2.084478783	0.571068543	2.084478783	-2.049993382
ENSG00000131781	FMO5	9.01E-08	3.28E-06	0.193671438	4.245133755	0.832066023	0.079544304	0.503003975	0.194029872	0.503003975	-1.035313397
ENSG00000004799	PDK4	9.55E-08	3.46E-06	0.179625888	2.847798432	0.55403545	0.016132099	0.296115279	0.484984315	0.484984315	-0.958332004
ENSG00000063046	EIF4B	9.81E-08	3.54E-06	0.088449524	5.869291919	0.117389923	0.000891853	0.055376334	0.120612482	0.120612482	-0.471448537
ENSG00000187189	TSPYL4	1.08E-07	3.86E-06	0.092288459	5.485094075	0.178016327	0.005523035	0.116979468	0.126757384	0.126757384	-0.490360233
ENSG00000104549	SQLE	1.18E-07	4.20E-06	0.103959912	4.906099799	0.247198272	0.005752358	0.162101982	0.146554923	0.162101982	-0.550623153
ENSG00000162851	TFB2M	1.36E-07	4.75E-06	0.10052355	4.902239788	0.188378529	0.010197942	0.105209348	0.146743054	0.146743054	-0.529813984
ENSG00000115107	STEAP3	1.39E-07	4.84E-06	0.10923098	6.499914568	0.267830224	0.001576449	0.183730808	0.118659484	0.183730808	-0.575290872
ENSG00000183914	DNAH2	1.44E-07	4.99E-06	0.167763807	5.597698018	0.624397705	0.005911407	0.431205209	0.124371108	0.431205209	-0.882499781
ENSG00000160285	LSS	1.64E-07	5.62E-06	0.136271074	4.510779877	0.368711399	0.117960128	0.129982492	0.170448418	0.170448418	-0.713470971
ENSG00000188659	SAXO2	1.71E-07	5.80E-06	0.151699259	5.319733043	0.517358851	0.007933129	0.349477685	0.130895687	0.349477685	-0.793171186
ENSG00000290989		1.76E-07	5.94E-06	0.202015699	3.700062495	0.922414702	0.095356342	0.538471061	0.269788915	0.538471061	-1.055203925
ENSG00000175970	UNC119B	1.85E-07	6.22E-06	0.099131584	4.839236545	0.211579199	0.00271602	0.145349307	0.149908692	0.149908692	-0.516839411
ENSG00000014824	SLC30A9	2.18E-07	7.20E-06	0.110342159	4.41656169	0.207562158	0.011026439	0.109701449	0.178070161	0.178070161	-0.571902851
ENSG00000025039	RRAGD	2.22E-07	7.30E-06	0.112617495	6.109677217	0.30165083	0.00947716	0.187498471	0.11908446	0.187498471	-0.583353154
ENSG00000135549	PKIB	2.34E-07	7.68E-06	0.149004952	5.74671197	0.479073035	0.005542146	0.339285577	0.121986809	0.339285577	-0.770317566
ENSG00000122729	ACO1	2.69E-07	8.66E-06	0.112799353	4.594340537	0.275886227	0.013340505	0.184271802	0.164426897	0.184271802	-0.580265999
ENSG00000100033	PRODH	2.86E-07	9.17E-06	0.257174199	4.62660857	1.415758053	0.067041584	0.960159715	0.162267993	0.960159715	-1.319988552
ENSG00000165795	NDRG2	2.88E-07	9.22E-06	0.107487676	5.822249694	0.268460489	0.001771851	0.177667676	0.121084158	0.177667676	-0.55154501
ENSG00000186132	C2orf76	3.04E-07	9.70E-06	0.114489728	4.359541979	0.284163762	0.020503321	0.181702374	0.183076072	0.183076072	-0.586314376
ENSG00000179133	C10orf67	3.07E-07	9.77E-06	0.176756672	5.528638058	0.687852838	0.013419886	0.47181543	0.125787216	0.47181543	-0.904851169
ENSG00000060656	PTPRU	3.21E-07	1.02E-05	0.089837651	6.077616543	0.168206053	0.006131846	0.115322284	0.119216193	0.119216193	-0.459130208
ENSG00000100307	CBX7	3.22E-07	1.02E-05	0.130630013	3.773897879	0.298451654	0.008808597	0.139923679	0.256216321	0.256216321	-0.667525435
ENSG00000159708	LRRC36	3.23E-07	1.02E-05	0.220400302	3.474666519	1.043949994	0.057625754	0.696814999	0.317500392	0.696814999	-1.126164333
ENSG00000101558	VAPA	3.49E-07	1.09E-05	0.089000557	6.747614092	0.189952884	0.001769675	0.1212533	0.11942927	0.1212533	-0.453443026
ENSG00000143149	ALDH9A1	3.50E-07	1.09E-05	0.093675365	5.30329009	0.130527599	0.004930133	0.06128386	0.131355964	0.131355964	-0.477203338
ENSG00000283997	LDAF1	3.53E-07	1.10E-05	0.308414216	2.866638452	2.033124702	0.317146443	1.160156445	0.479072665	1.160156445	-1.57070571
ENSG00000185963	BICD2	3.69E-07	1.14E-05	0.13204654	5.15270834	0.390761636	0.009293695	0.261510146	0.136107537	0.261510146	-0.67137528
ENSG00000188542	DUSP28	3.76E-07	1.16E-05	0.120290444	4.217096558	0.311787791	0.027818004	0.192201722	0.196913017	0.196913017	-0.611181021
ENSG00000129151	BBOX1	3.81E-07	1.17E-05	0.205213606	3.191285153	0.905414023	0.090628359	0.563424839	0.384931684	0.563424839	-1.042104801
ENSG00000100316	RPL3	3.95E-07	1.21E-05	0.098908537	8.505604662	0.221874603	0.00018473	0.151753941	0.151274132	0.151753941	-0.501621287
ENSG00000186591	UBE2H	4.39E-07	1.34E-05	0.098268255	4.874264185	0.182768484	0.001851913	0.106416415	0.148125983	0.148125983	-0.49636937
ENSG00000164953	TMEM67	4.41E-07	1.34E-05	0.111819025	5.818937034	0.26892653	0.009505287	0.184687087	0.121119889	0.184687087	-0.564744169
ENSG00000101448	EPPIN	4.50E-07	1.36E-05	0.265886539	4.800770356	1.562774769	0.048911824	1.049065754	0.151937929	1.049065754	-1.341788862
ENSG00000131018	SYNE1	4.49E-07	1.36E-05	0.10736493	6.318190888	0.254823983	0.005226194	0.173803742	0.118607916	0.173803742	-0.541844974
ENSG00000132405	TBC1D14	4.57E-07	1.38E-05	0.099817666	6.186434404	0.217487002	0.00316641	0.151578222	0.118839278	0.151578222	-0.503430536
ENSG00000144451	SPAG16	4.70E-07	1.42E-05	0.11951751	6.261870119	0.304216066	0.003421433	0.218430819	0.118679546	0.218430819	-0.602158608
ENSG00000204104	TRAF3IP1	5.16E-07	1.55E-05	0.105600679	5.538493085	0.236898345	0.014226537	0.158968	0.125572999	0.158968	-0.530158658
ENSG00000172955	ADH6	5.26E-07	1.58E-05	0.249518267	3.430134945	1.388590331	0.042598259	0.924354955	0.327739846	0.924354955	-1.251684176
ENSG00000115129	TP53I3	5.45E-07	1.63E-05	0.093587755	5.301263834	0.169581639	0.004617899	0.107759785	0.131413396	0.131413396	-0.468866845
ENSG00000141429	GALNT1	5.89E-07	1.75E-05	0.107287801	5.264641905	0.29864167	0.018959554	0.159813252	0.132479483	0.159813252	-0.535880564
ENSG00000290689		6.04E-07	1.79E-05	0.103373391	5.410848268	0.236259238	0.002023872	0.163941809	0.128515513	0.163941809	-0.515827941
ENSG00000034239	CLXN	6.08E-07	1.80E-05	0.135217836	6.136151532	0.392612138	0.002990989	0.280976571	0.118989281	0.280976571	-0.674541995
ENSG00000196636	SDHAF3	6.12E-07	1.80E-05	0.107686109	4.539907185	0.23483293	0.011827764	0.129523493	0.168274903	0.168274903	-0.537081205
ENSG00000233476	EEF1A1P6	6.11E-07	1.80E-05	0.260606598	2.136602072	1.529614191	0.180654306	0.874149246	0.685207113	0.874149246	-1.299820888
ENSG00000188343	CIBAR1	6.19E-07	1.82E-05	0.117236719	4.266178792	0.178814846	0.021546814	0.067279367	0.191918874	0.191918874	-0.584442204
ENSG00000168309	FAM107A	6.43E-07	1.89E-05	0.250485328	5.935403566	1.343089562	0.007878967	0.966584034	0.120055373	0.966584034	-1.246848515
ENSG00000118690	ARMC2	6.68E-07	1.95E-05	0.1342481	4.13029311	0.379839748	0.026018719	0.253890414	0.2063776	0.253890414	-0.667289691
ENSG00000064199	SPA17	6.92E-07	2.01E-05	0.136734843	7.285394806	0.398805796	0.006899303	0.283475656	0.123971267	0.283475656	-0.678714001
ENSG00000117906	RCN2	6.92E-07	2.01E-05	0.090298468	5.759316056	0.174366427	0.004814254	0.116713357	0.121823015	0.121823015	-0.448215554
ENSG00000115685	PPP1R7	6.95E-07	2.01E-05	0.088117263	6.351508806	0.113527302	0.002008141	0.060028279	0.118585044	0.118585044	-0.437311882
ENSG00000174444	RPL4	7.18E-07	2.07E-05	0.09812754	8.436634927	0.189059684	0.000567404	0.125909251	0.148981278	0.148981278	-0.486349828
ENSG00000154080	CHST9	7.21E-07	2.07E-05	0.155994595	6.717421819	0.538227886	0.002175115	0.375762286	0.119291868	0.375762286	-0.773042707
ENSG00000112796	ENPP5	7.31E-07	2.09E-05	0.191296978	6.224364956	0.78378149	0.004445399	0.563906072	0.118749985	0.563906072	-0.947490518
ENSG00000149646	CNBD2	7.41E-07	2.11E-05	0.3073117	4.075546951	2.080589643	0.126712445	1.340047229	0.212791636	1.340047229	-1.521274841
ENSG00000163029	SMC6	7.89E-07	2.24E-05	0.121549297	4.874685614	0.361433072	0.024034972	0.205424333	0.14810489	0.205424333	-0.600228352
ENSG00000185238	PRMT3	1.01E-06	2.79E-05	0.115492938	4.280184063	0.215001242	0.016624022	0.123516035	0.190538708	0.190538708	-0.564794185
ENSG00000138175	ARL3	1.05E-06	2.89E-05	0.097710882	7.24720887	0.211117806	0.000968589	0.147312797	0.123513968	0.147312797	-0.477014464
ENSG00000124279	FASTKD3	1.13E-06	3.08E-05	0.111584268	4.509036638	0.218121365	0.022796671	0.124670839	0.170581169	0.170581169	-0.543129865
ENSG00000167552	TUBA1A	1.13E-06	3.08E-05	0.112178553	9.19362593	0.284931024	0.000160401	0.195282744	0.180473255	0.195282744	-0.546080229
ENSG00000234602	MCIDAS	1.16E-06	3.13E-05	0.168028966	3.680389683	0.592630607	0.052644466	0.38585501	0.273600133	0.38585501	-0.816989891
ENSG00000109771	LRP2BP	1.16E-06	3.13E-05	0.146535856	4.570756926	0.468345153	0.029758691	0.303735736	0.166061144	0.303735736	-0.712437807
ENSG00000196782	MAML3	1.18E-06	3.17E-05	0.128904216	3.862147212	0.237161001	0.016434866	0.105987222	0.241633644	0.241633644	-0.626249624
ENSG00000138834	MAPK8IP3	1.25E-06	3.32E-05	0.124277667	4.419841386	0.323135665	0.012385827	0.227490259	0.177790845	0.227490259	-0.602533701
ENSG00000141556	TBCD	1.28E-06	3.38E-05	0.139315896	6.224417033	0.416236621	0.028454629	0.272986225	0.118749875	0.272986225	-0.674614238
ENSG00000164751	PEX2	1.31E-06	3.46E-05	0.090465151	5.752063076	0.148385213	0.005188621	0.094821206	0.121916601	0.121916601	-0.437624563
ENSG00000162852	CNST	1.36E-06	3.57E-05	0.103922302	4.637098903	0.176493138	0.006148397	0.109739558	0.161584515	0.161584515	-0.502033483
ENSG00000164683	HEY1	1.37E-06	3.58E-05	0.159982675	5.665125931	0.5878395	0.165397482	0.232111256	0.123185232	0.232111256	-0.772631965
ENSG00000125319	HROB	1.41E-06	3.69E-05	0.197376765	3.031456645	0.817272419	0.141242099	0.463810069	0.429008218	0.463810069	-0.952004241
ENSG00000186665	C17orf58	1.44E-06	3.73E-05	0.097956766	5.072746585	0.150884014	0.009929947	0.08256593	0.139098662	0.139098662	-0.472128165
ENSG00000249139	EPPIN-WFDC6	1.48E-06	3.84E-05	0.292589647	2.18313045	1.863768883	0.173080617	1.156512264	0.674307415	1.156512264	-1.408463222
ENSG00000170482	SLC23A1	1.49E-06	3.85E-05	0.272610868	3.758050957	1.589964862	0.021397258	1.132818767	0.259028327	1.132818767	-1.31194519
ENSG00000064225	ST3GAL6	1.51E-06	3.90E-05	0.131994863	5.396864236	0.379999167	0.007181174	0.26341075	0.128863535	0.26341075	-0.634835588
ENSG00000050030	NEXMIF	1.52E-06	3.91E-05	0.170433706	3.245325563	0.649117258	0.078586978	0.372553449	0.371345113	0.372553449	-0.81957261
ENSG00000174343	CHRNA9	1.55E-06	3.96E-05	0.235780698	1.479185811	1.023159412	0.063616854	0.609684451	0.79979353	0.79979353	-1.132900351
ENSG00000163689	CFAP20DC	1.55E-06	3.97E-05	0.143571696	3.565269053	0.405131606	0.022781799	0.274980222	0.297357087	0.297357087	-0.689758741
ENSG00000158639	PAGE5	1.63E-06	4.11E-05	0.282068776	1.982708435	1.647444547	0.128237925	1.107455673	0.718906449	1.107455673	-1.35243858
ENSG00000053918	KCNQ1	1.65E-06	4.15E-05	0.126189172	4.046783092	0.288302213	0.031003711	0.145077786	0.216308152	0.216308152	-0.604770478
ENSG00000291064	RPL23AP7	1.85E-06	4.57E-05	0.097938217	5.12866602	0.185480417	0.012003442	0.116656503	0.136968732	0.136968732	-0.467126098
ENSG00000206560	ANKRD28	1.85E-06	4.57E-05	0.102957988	4.70541444	0.203118936	0.007296121	0.14141812	0.157338384	0.157338384	-0.491017457
ENSG00000111275	ALDH2	1.93E-06	4.76E-05	0.10658503	6.725200565	0.263637214	0.003917972	0.172520461	0.119326104	0.172520461	-0.507414401
ENSG00000166069	TMCO5A	2.08E-06	5.10E-05	0.205650206	3.232264062	0.884084627	0.06213024	0.594708967	0.374561826	0.594708967	-0.975949387
ENSG00000126838	PZP	2.09E-06	5.12E-05	0.212287035	3.121477119	0.928171348	0.022663409	0.677255479	0.403515329	0.677255479	-1.00717665
ENSG00000107164	FUBP3	2.16E-06	5.27E-05	0.105858361	4.746643403	0.2289681	0.013646367	0.160394444	0.154933992	0.160394444	-0.501505335
ENSG00000141447	OSBPL1A	2.18E-06	5.28E-05	0.134453431	3.712322616	0.278932051	0.013312049	0.145056962	0.267453971	0.267453971	-0.636771971
ENSG00000168944	CEP120	2.19E-06	5.28E-05	0.093092105	5.590165179	0.151327436	0.010078836	0.093156403	0.124515403	0.124515403	-0.44082247
ENSG00000152990	ADGRA3	2.36E-06	5.65E-05	0.179422976	2.903510361	0.493462151	0.032397825	0.269062541	0.467587065	0.467587065	-0.846927768
ENSG00000184500	PROS1	2.47E-06	5.86E-05	0.244566115	5.565722247	1.229680539	0.016317655	0.912634482	0.125000724	0.912634482	-1.152133442
ENSG00000163071	SPATA18	2.54E-06	6.03E-05	0.134547499	4.97195865	0.379372154	0.001468438	0.279690587	0.143436516	0.279690587	-0.633007693
ENSG00000113282	CLINT1	2.58E-06	6.10E-05	0.088647911	6.846343257	0.142422357	0.002085997	0.100508222	0.119964002	0.119964002	-0.416807886
ENSG00000176209	SMIM19	2.87E-06	6.68E-05	0.093516249	6.427442995	0.18295153	0.002530184	0.133293319	0.118587123	0.133293319	-0.437637735
ENSG00000147604	RPL7	3.07E-06	7.09E-05	0.09930862	8.553207797	0.211307454	0.000252409	0.137341988	0.152917927	0.152917927	-0.463387102
ENSG00000181104	F2R	3.15E-06	7.27E-05	0.188530093	4.397726471	0.744828898	0.040735449	0.511293854	0.179692172	0.511293854	-0.878686601
ENSG00000066044	ELAVL1	3.42E-06	7.80E-05	0.101089643	4.795988714	0.120265513	0.006517826	0.062315313	0.152195757	0.152195757	-0.469432982
ENSG00000163349	HIPK1	3.54E-06	8.04E-05	0.087968349	6.379174942	0.132288343	0.001608864	0.087605344	0.118577073	0.118577073	-0.407876808
ENSG00000205038	PKHD1L1	3.69E-06	8.34E-05	0.340662659	2.199514615	2.450870824	0.321754847	1.480639576	0.670395424	1.480639576	-1.57666611
ENSG00000163875	MEAF6	3.78E-06	8.49E-05	0.088804214	6.185538552	0.158372167	0.00363915	0.115487157	0.118841623	0.118841623	-0.410530747
ENSG00000111666	CHPT1	3.86E-06	8.64E-05	0.123413276	4.954453498	0.358258469	0.008107025	0.228443835	0.144249376	0.228443835	-0.570016406
ENSG00000049759	NEDD4L	3.97E-06	8.81E-05	0.098726949	7.482830449	0.19776803	0.004293165	0.147088125	0.126681746	0.147088125	-0.45543849
ENSG00000166173	LARP6	4.07E-06	8.99E-05	0.165176766	4.46844923	0.565463857	0.022940998	0.400798247	0.173761001	0.400798247	-0.761130821
ENSG00000067704	IARS2	4.14E-06	9.13E-05	0.107806221	4.450285902	0.149233346	0.005263301	0.080134198	0.175241356	0.175241356	-0.496386447
ENSG00000178234	GALNT11	4.15E-06	9.15E-05	0.135529605	3.667299292	0.207634347	0.009099454	0.093947308	0.276179092	0.276179092	-0.623931824
ENSG00000096060	FKBP5	4.19E-06	9.19E-05	0.222058927	6.06287589	1.035094283	0.003726547	0.762112039	0.119283191	0.762112039	-1.021902583
ENSG00000176407	KCMF1	4.21E-06	9.23E-05	0.149022255	4.330254477	0.449761506	0.010844729	0.334063085	0.185760986	0.334063085	-0.685623736
ENSG00000135617	PRADC1	4.62E-06	0.000100723	0.10209283	4.858490814	0.212671859	0.004939027	0.15694025	0.148921444	0.15694025	-0.467725907
ENSG00000068615	REEP1	4.68E-06	0.000101773	0.161960631	4.029431107	0.534670801	0.066346806	0.34105194	0.218480142	0.34105194	-0.741558866
ENSG00000138413	IDH1	4.82E-06	0.000104566	0.092734557	5.898090323	0.174264953	0.002050729	0.131511598	0.120355267	0.131511598	-0.424045765
ENSG00000165816	VWA2	4.98E-06	0.000107745	0.119701619	4.093814847	0.290067349	0.01192487	0.187142178	0.210611409	0.210611409	-0.546503559
ENSG00000109762	SNX25	5.01E-06	0.000108252	0.118724702	4.235560095	0.221923861	0.023913573	0.108371528	0.195005169	0.195005169	-0.541892417
ENSG00000116793	PHTF1	5.23E-06	0.000112717	0.090104779	5.970098979	0.163497172	0.006286252	0.098875802	0.119808327	0.119808327	-0.410447047
ENSG00000165516	KLHDC2	5.28E-06	0.000113455	0.097567922	5.081455952	0.153352996	0.009093075	0.097571089	0.138754729	0.138754729	-0.444254006
ENSG00000171840	NINJ2	5.40E-06	0.0001152	0.13961504	4.659258685	0.394836881	0.03212195	0.270614826	0.160169127	0.270614826	-0.63505997
ENSG00000243543	WFDC6	5.46E-06	0.000115961	0.231635342	5.266674503	1.098715069	0.021787866	0.811529468	0.132418878	0.811529468	-1.053111086
ENSG00000116990	MYCL	5.53E-06	0.000117346	0.123893048	4.797089199	0.309774242	0.012265966	0.226127663	0.152136306	0.226127663	-0.562924981
ENSG00000120992	LYPLA1	5.54E-06	0.000117365	0.108660922	4.417896193	0.192193381	0.005421735	0.108206387	0.177956397	0.177956397	-0.493665646
ENSG00000284900	KBTBD4	5.57E-06	0.000117383	0.206606002	3.190541585	0.865356502	0.020606029	0.642352921	0.385123651	0.642352921	-0.9384391
ENSG00000123444	KBTBD4	5.57E-06	0.000117383	0.206606002	3.190541585	0.865356502	0.020606029	0.642352921	0.385123651	0.642352921	-0.9384391
ENSG00000144026	ZNF514	5.56E-06	0.000117383	0.108326033	5.242988022	0.245957843	0.040049383	0.14220016	0.133136067	0.14220016	-0.492084801
ENSG00000198176	TFDP1	5.60E-06	0.000117908	0.119676209	5.178688061	0.317090335	0.006683657	0.215758151	0.135211394	0.215758151	-0.543443466
ENSG00000167740	CYB5D2	5.67E-06	0.00011866	0.098169147	5.031500668	0.181812468	0.008883191	0.121092773	0.14079234	0.14079234	-0.445528486
ENSG00000088387	DOCK9	5.72E-06	0.000119561	0.096031366	5.76138702	0.183258169	0.015090653	0.128137035	0.121796623	0.128137035	-0.435631159
ENSG00000137707	BTG4	5.80E-06	0.000120789	0.158084391	4.073125662	0.539149773	0.030464058	0.357667318	0.213083678	0.357667318	-0.716696474
ENSG00000143653	SCCPDH	5.86E-06	0.000121351	0.088288225	6.326046416	0.143977953	0.002460363	0.104777127	0.118601217	0.118601217	-0.400082261
ENSG00000048342	CC2D2A	5.91E-06	0.00012234	0.112658468	6.988956703	0.263683815	0.006355978	0.190763005	0.120970122	0.190763005	-0.510292924
ENSG00000150403	TMCO3	6.06E-06	0.000125026	0.114099399	5.099956567	0.295861567	0.009841502	0.192352135	0.138039341	0.192352135	-0.516233238
ENSG00000132122	SPATA6	6.13E-06	0.000126319	0.126796248	3.902588951	0.244731483	0.014106387	0.142437292	0.235590758	0.235590758	-0.573368119
ENSG00000086475	SEPHS1	6.14E-06	0.000126475	0.092996381	5.590453637	0.129480017	0.009807751	0.075505982	0.124509832	0.124509832	-0.420476508
ENSG00000188613	NANOS1	6.20E-06	0.0001274	0.204746309	3.101885096	0.854103007	0.202066309	0.449011559	0.408925368	0.449011559	-0.925317889
ENSG00000084693	AGBL5	6.24E-06	0.000128091	0.096253094	5.103306567	0.184912962	0.0058743	0.138015553	0.137911972	0.138015553	-0.434863847
ENSG00000102317	RBM3	6.35E-06	0.000130048	0.148889616	6.883371406	0.467924233	0.001424899	0.342869208	0.120198518	0.342869208	-0.672131895
ENSG00000168658	VWA3B	6.49E-06	0.000132416	0.15604063	5.900934394	0.492996423	0.009938913	0.368221583	0.120331107	0.368221583	-0.703710398
ENSG00000162174	ASRGL1	6.71E-06	0.000136366	0.091171746	5.51283398	0.163521363	0.002963809	0.118277115	0.126134724	0.126134724	-0.410522031
ENSG00000124749	COL21A1	6.80E-06	0.00013778	0.183361887	3.97018512	0.68331658	0.042083709	0.480094698	0.226194442	0.480094698	-0.825128307
ENSG00000046653	GPM6B	6.85E-06	0.000138538	0.162085188	3.23126319	0.47347021	0.033215505	0.301513026	0.374810109	0.374810109	-0.729106302
ENSG00000183690	EFHC2	6.92E-06	0.000139557	0.146009655	5.665689407	0.423664892	0.007897601	0.323206012	0.123176096	0.323206012	-0.656458175
ENSG00000170873	MTSS1	6.94E-06	0.000139557	0.109397931	4.485413318	0.172105639	0.013463291	0.101169826	0.172410855	0.172410855	-0.491815096
ENSG00000179299	NSUN7	6.93E-06	0.000139557	0.116545818	4.146958434	0.194484108	0.006461977	0.11497725	0.204495128	0.204495128	-0.523968528
ENSG00000176597	B3GNT5	7.00E-06	0.000140503	0.123357944	4.652672046	0.33542747	0.002876666	0.233462128	0.160585873	0.233462128	-0.554330747
ENSG00000121957	GPSM2	7.18E-06	0.000143181	0.111985756	4.711713028	0.214554427	0.037808157	0.095675635	0.156963761	0.156963761	-0.50262733
ENSG00000284862	CCDC39	7.17E-06	0.000143181	0.124962076	5.798566009	0.321123018	0.017577351	0.224948051	0.121347176	0.224948051	-0.560891199
ENSG00000267023	LRRC37A16P	7.30E-06	0.000145339	0.152202384	3.892842673	0.457684507	0.031867285	0.327918232	0.237008991	0.327918232	-0.682606197
ENSG00000255302	EID1	7.84E-06	0.000154849	0.087980699	6.628233303	0.129178298	0.001262802	0.084482639	0.118956885	0.118956885	-0.393226059
ENSG00000206199	ANKUB1	7.95E-06	0.000156697	0.183118877	5.029202677	0.68504953	0.009300731	0.511494507	0.140889954	0.511494507	-0.817928635
ENSG00000101856	PGRMC1	7.98E-06	0.00015709	0.088183671	6.661755688	0.13005615	0.00170462	0.089730365	0.119070399	0.119070399	-0.393815278
ENSG00000015171	ZMYND11	8.01E-06	0.000157154	0.352873069	3.53783958	2.642851011	0.919613779	1.014303076	0.303340561	1.014303076	-1.575507507
ENSG00000197653	DNAH10	8.02E-06	0.000157154	0.187273053	5.485886822	0.697979186	0.009073399	0.535619047	0.126739353	0.535619047	-0.836119236
ENSG00000157514	TSC22D3	8.18E-06	0.000159897	0.19182677	5.560695699	0.783646181	0.002043343	0.569460557	0.125103825	0.569460557	-0.855638027
ENSG00000144560	VGLL4	8.46E-06	0.000164776	0.117901291	4.197359937	0.188605023	0.01690038	0.101945871	0.198992287	0.198992287	-0.525042312
ENSG00000206530	CFAP44	9.33E-06	0.00018063	0.131570474	4.422278251	0.343263048	0.012449355	0.256405352	0.177583902	0.256405352	-0.583141795
ENSG00000167377	ZNF23	9.66E-06	0.000186802	0.110874678	4.530371845	0.2019513	0.021948892	0.122441324	0.168977301	0.168977301	-0.490581965
ENSG00000113558	SKP1	9.70E-06	0.000187039	0.105158004	7.098580889	0.222331746	0.005210829	0.166534701	0.121934608	0.166534701	-0.465203742
ENSG00000172992	DCAKD	9.86E-06	0.00018967	0.098287991	5.401316442	0.197291351	0.008437521	0.141600625	0.128752102	0.141600625	-0.434463759
ENSG00000156802	ATAD2	1.00E-05	0.000192368	0.130940133	3.966337981	0.333383856	0.039572968	0.223469476	0.2267118	0.2267118	-0.578362365
ENSG00000240204	SMKR1	1.01E-05	0.000193416	0.132904416	3.937512946	0.357538322	0.043679912	0.229325344	0.230654063	0.230654063	-0.586771733
ENSG00000001084	GCLC	1.03E-05	0.000196888	0.123484276	6.40324713	0.311827417	0.001819801	0.235003314	0.118578277	0.235003314	-0.544616225
ENSG00000113391	FAM172A	1.04E-05	0.000198604	0.145010494	3.515813548	0.352436876	0.018366123	0.172071086	0.308221433	0.308221433	-0.639245336
ENSG00000144908	ALDH1L1	1.04E-05	0.000198657	0.134425297	7.472962257	0.359800732	0.00423817	0.276410366	0.126532241	0.276410366	-0.592505507
ENSG00000161905	ALOX15	1.06E-05	0.000200584	0.197812496	7.491992726	0.790089302	0.000625928	0.607100627	0.126821901	0.607100627	-0.871329386
ENSG00000007933	FMO3	1.09E-05	0.000205542	0.18686771	5.89649478	0.709389019	0.001713367	0.540623711	0.120368917	0.540623711	-0.821985125
ENSG00000187889	FYB2	1.12E-05	0.000211072	0.19632038	4.527578939	0.787965872	0.032455522	0.566137354	0.169184701	0.566137354	-0.862331898
ENSG00000162521	RBBP4	1.12E-05	0.000211434	0.141760983	4.57572796	0.396831857	0.00806986	0.304044824	0.16571258	0.304044824	-0.622591967
ENSG00000247626	MARS2	1.17E-05	0.000218561	0.160894211	3.389135923	0.468925464	0.064748859	0.291560077	0.337302566	0.337302566	-0.705337593
ENSG00000115423	DNAH6	1.20E-05	0.000223224	0.159185166	5.428308636	0.524974791	0.026873941	0.366681534	0.12808892	0.366681534	-0.696990835
ENSG00000203734	ECT2L	1.19E-05	0.000223224	0.188314595	5.371455255	0.743432636	0.026352585	0.524415452	0.129511179	0.524415452	-0.824546126
ENSG00000122378	PRXL2A	1.22E-05	0.000226611	0.08857149	6.257406697	0.164106431	0.003152664	0.115171548	0.118686995	0.118686995	-0.387473265
ENSG00000144061	NPHP1	1.23E-05	0.000228122	0.124243656	6.692694943	0.305646676	0.006275485	0.233469325	0.119188401	0.233469325	-0.543284459
ENSG00000023909	GCLM	1.26E-05	0.000232495	0.10814486	6.11955743	0.241118693	0.004690815	0.17694962	0.119047551	0.17694962	-0.472330097
ENSG00000054219	LY75	1.27E-05	0.000233989	0.104222051	4.684162449	0.180913588	0.010079195	0.115548433	0.158622716	0.158622716	-0.455024583
ENSG00000203666	EFCAB2	1.28E-05	0.000235537	0.105285468	5.546502634	0.228554993	0.005935344	0.16622679	0.125401133	0.16622679	-0.459488842
ENSG00000114790	ARHGEF26	1.33E-05	0.000244645	0.132706341	3.951873618	0.37295371	0.019075714	0.254441156	0.228675388	0.254441156	-0.577956684
ENSG00000154845	PPP4R1	1.34E-05	0.000245786	0.101222819	4.740147165	0.168737592	0.003826533	0.119146949	0.155305504	0.155305504	-0.440712215
ENSG00000079335	CDC14A	1.34E-05	0.000246178	0.112521153	4.442542329	0.259287986	0.013323745	0.18331501	0.175882469	0.18331501	-0.489836104
ENSG00000135324	MRAP2	1.40E-05	0.000255023	0.104004496	5.417270287	0.216294922	0.006414275	0.161584066	0.128357604	0.161584066	-0.451850328
ENSG00000135392	DNAJC14	1.40E-05	0.000255252	0.125415785	5.094386142	0.317884013	0.015115764	0.229173943	0.138252594	0.229173943	-0.544752792
ENSG00000198780	FAM169A	1.42E-05	0.000257665	0.174108828	3.368033584	0.518037932	0.128546762	0.252716281	0.342259633	0.342259633	-0.755763654
ENSG00000101191	DIDO1	1.45E-05	0.00026172	0.089078707	5.934106665	0.107824089	0.00317393	0.068869705	0.120065188	0.120065188	-0.386266736
ENSG00000288611	NPBWR1	1.45E-05	0.00026172	0.394768271	2.17770072	3.057169246	0.109730791	2.31065864	0.675595475	2.31065864	-1.711526044
ENSG00000117528	ABCD3	1.46E-05	0.00026172	0.089713817	6.523565848	0.167392785	0.002859336	0.122143378	0.118698007	0.122143378	-0.388938356
ENSG00000153132	CLGN	1.47E-05	0.000264662	0.207196251	3.742121466	0.854613705	0.063929003	0.602823346	0.261911666	0.602823346	-0.897701531
ENSG00000100503	NIN	1.48E-05	0.00026486	0.139933234	4.325963746	0.444706648	0.014816653	0.289301617	0.186161027	0.289301617	-0.606218912
ENSG00000164099	PRSS12	1.55E-05	0.000274051	0.126295254	4.414060655	0.316132983	0.009685931	0.238041918	0.17828378	0.238041918	-0.545848139
ENSG00000102181	CD99L2	1.55E-05	0.000274051	0.110965425	4.351181151	0.14916234	0.00740436	0.079178932	0.183834494	0.183834494	-0.479573806
ENSG00000164331	ANKRA2	1.55E-05	0.000274051	0.106900992	4.610132009	0.214749578	0.014126545	0.154790212	0.163359511	0.163359511	-0.461996134
ENSG00000009830	POMT2	1.59E-05	0.000279328	0.122863324	4.245183683	0.29389026	0.016427315	0.218020015	0.194024811	0.218020015	-0.530298869
ENSG00000250182	EEF1A1P13	1.61E-05	0.000283663	0.241990873	2.023722024	1.132889046	0.199198291	0.703846603	0.710293416	0.710293416	-1.043559894
ENSG00000138801	PAPSS1	1.63E-05	0.000285625	0.10214292	4.707214242	0.131781469	0.0048071	0.07698996	0.15723106	0.15723106	-0.440299871
ENSG00000269955	FMC1-LUC7L2	1.65E-05	0.000288662	0.589833148	2.475923225	6.80465784	0.441073174	4.962227321	0.599180485	4.962227321	-2.540882158
ENSG00000197417	SHPK	1.66E-05	0.000290015	0.101975672	5.189502956	0.20584643	0.007489587	0.154018371	0.134848478	0.154018371	-0.439135466
ENSG00000212907	MT-ND4L	1.69E-05	0.000293823	0.20115502	8.490727602	0.790615023	0.000304955	0.628133167	0.150770748	0.628133167	-0.865432656
ENSG00000127863	TNFRSF19	1.69E-05	0.000293823	0.117895323	6.279584694	0.27917492	0.006204138	0.209666674	0.11865255	0.209666674	-0.50721953
ENSG00000285641		1.69E-05	0.000293823	0.201073571	3.404130065	0.800831771	0.209589807	0.418339497	0.333793227	0.418339497	-0.865053782
ENSG00000290717		1.71E-05	0.000296743	0.216629842	3.356537952	0.91485308	0.179231401	0.549617222	0.344966814	0.549617222	-0.931452502
ENSG00000234857	HNRNPUL2-BSCL2	1.75E-05	0.000303543	0.63361821	3.927065913	7.770780126	0.540679437	5.69460214	0.232112023	5.69460214	-2.720751909
ENSG00000165164	CFAP47	1.77E-05	0.000306051	0.184262054	4.486166702	0.659752602	0.038177761	0.489140228	0.172351607	0.489140228	-0.7908389
ENSG00000155093	PTPRN2	1.80E-05	0.000309895	0.102017316	6.470436556	0.218107084	0.002164653	0.159475242	0.118621746	0.159475242	-0.437543297
ENSG00000099622	CIRBP	1.88E-05	0.000321241	0.090786364	7.52098911	0.116071144	0.00073541	0.071557523	0.127274036	0.127274036	-0.388452433
ENSG00000164828	SUN1	1.88E-05	0.000321645	0.093639103	5.284957841	0.125494383	0.004299199	0.083467502	0.131881405	0.131881405	-0.400610006
ENSG00000103479	RBL2	1.89E-05	0.000321885	0.123139813	3.943781228	0.204883587	0.00571692	0.127327011	0.229786789	0.229786789	-0.52677111
ENSG00000145358	DDIT4L	1.90E-05	0.000322629	0.226120388	2.097392842	1.085737401	0.08042618	0.713682998	0.694143921	0.713682998	-0.967026321
ENSG00000013563	DNASE1L1	1.90E-05	0.000322629	0.091261302	5.593472979	0.129295608	0.004900543	0.079603336	0.124451738	0.124451738	-0.390307753
ENSG00000188396	DYNLT4	1.92E-05	0.00032628	0.196984088	7.002321617	0.775427223	0.00267094	0.599976148	0.12107874	0.599976148	-0.841881297
ENSG00000130956	HABP4	1.95E-05	0.000330535	0.107589174	4.584260262	0.217587218	0.014659136	0.143642341	0.165119432	0.165119432	-0.45945851
ENSG00000153339	TRAPPC8	1.96E-05	0.000331888	0.116966854	4.252740806	0.209269469	0.019222447	0.130608835	0.193261629	0.193261629	-0.499343653
ENSG00000114473	IQCG	1.97E-05	0.000332136	0.119835778	6.142453925	0.282137715	0.001726269	0.221309115	0.118968337	0.221309115	-0.51150392
ENSG00000153531	ADPRHL1	2.00E-05	0.000336879	0.138954575	4.825952415	0.374528096	0.015635324	0.284243964	0.150600674	0.284243964	-0.592551234
ENSG00000070087	PFN2	2.02E-05	0.000338274	0.107985815	6.534065512	0.232363958	0.001301555	0.17980501	0.118717464	0.17980501	-0.460364415
ENSG00000198478	SH3BGRL2	2.17E-05	0.000362656	0.089212587	5.921482067	0.120339539	0.003446844	0.083988864	0.120162992	0.120162992	-0.37881506
ENSG00000164237	CMBL	2.22E-05	0.000369428	0.176865554	2.946368148	0.573792957	0.031419101	0.418842435	0.454414207	0.454414207	-0.750107622
ENSG00000087250	MT3	2.24E-05	0.00037227	0.364039131	4.826364474	2.591538204	0.023015963	2.035228272	0.150579073	2.035228272	-1.543221215
ENSG00000131778	CHD1L	2.31E-05	0.000381028	0.095703303	5.3220161	0.171625609	0.01141819	0.125387515	0.130832578	0.130832578	-0.405077214
ENSG00000103599	IQCH	2.35E-05	0.000385544	0.1458513	3.525846552	0.246977706	0.024395646	0.127161223	0.30599016	0.30599016	-0.61673073
ENSG00000196605	ZNF846	2.35E-05	0.000385544	0.140569597	3.687780149	0.288157546	0.034731409	0.16744316	0.272159178	0.272159178	-0.594415738
ENSG00000052126	PLEKHA5	2.42E-05	0.000393839	0.102836663	5.893829204	0.22805635	0.006340102	0.157906623	0.120391876	0.157906623	-0.434231793
ENSG00000167699	GLOD4	2.42E-05	0.000393938	0.098147092	5.001308941	0.118585256	0.007504925	0.069243651	0.142103358	0.142103358	-0.414401663
ENSG00000156968	MPV17L	2.44E-05	0.000395847	0.13097846	6.228450031	0.335866645	0.01064975	0.255790929	0.118741476	0.255790929	-0.552820804
ENSG00000213096	ZNF254	2.49E-05	0.000403208	0.11321806	4.457267801	0.249404515	0.024414083	0.148704624	0.174668003	0.174668003	-0.477336878
ENSG00000167106	FAM102A	2.49E-05	0.000403799	0.090602776	7.048036582	0.116669636	0.006023206	0.078287407	0.121469042	0.121469042	-0.381938185
ENSG00000167972	ABCA3	2.50E-05	0.000404701	0.1647479	3.288137449	0.461594301	0.060437314	0.290641617	0.36110439	0.36110439	-0.694340007
ENSG00000162688	AGL	2.51E-05	0.00040553	0.09786798	5.283175616	0.194165463	0.009537948	0.139220629	0.131933197	0.139220629	-0.412402857
ENSG00000165092	ALDH1A1	2.52E-05	0.000406145	0.13598645	7.944964537	0.368500941	0.000209918	0.286995112	0.135443344	0.286995112	-0.572951392
ENSG00000089876	DHX32	2.57E-05	0.000414238	0.088285996	6.519380399	0.122451789	0.002364814	0.09000244	0.118690655	0.118690655	-0.371561472
ENSG00000162836	ACP6	2.58E-05	0.000415757	0.1022092	4.953199728	0.196173032	0.017940502	0.125245562	0.144308019	0.144308019	-0.430050891
ENSG00000187325	TAF9B	2.59E-05	0.000416116	0.107999233	4.4958828	0.16340433	0.009558733	0.091209302	0.171592841	0.171592841	-0.454366973
ENSG00000185267	CDNF	2.60E-05	0.000417574	0.2116091	3.1593813	0.858089152	0.110527014	0.584928655	0.393286255	0.584928655	-0.889969304
ENSG00000136144	RCBTB1	2.62E-05	0.00041973	0.098909626	5.202209914	0.190040276	0.007879099	0.14406292	0.134429433	0.14406292	-0.415842025
ENSG00000140395	SKIC8	2.63E-05	0.000420304	0.090579557	5.663103358	0.096940416	0.004208783	0.059138845	0.123218129	0.123218129	-0.38075093
ENSG00000275555	DLL1	2.64E-05	0.000420998	0.143279662	3.941141077	0.413508459	0.05612998	0.262707868	0.230151395	0.262707868	-0.60218959
ENSG00000005189	REXO5	2.67E-05	0.000426017	0.169216095	3.081861663	0.413989145	0.030180487	0.260636552	0.414536898	0.414536898	-0.710628495
ENSG00000183346	CABCOCO1	2.69E-05	0.000428145	0.143146471	6.47306519	0.398751728	0.007204232	0.311041116	0.118624649	0.311041116	-0.600954235
ENSG00000204580	DDR1	2.71E-05	0.000429784	0.275459159	3.997504069	1.459010065	0.055744199	1.122716775	0.222578926	1.122716775	-1.156063128
ENSG00000165533	TTC8	2.76E-05	0.000436758	0.100990849	4.913188289	0.143050631	0.01219244	0.080877268	0.146211076	0.146211076	-0.423407335
ENSG00000087903	RFX2	2.77E-05	0.000438339	0.118744505	5.137792032	0.281805263	0.00886421	0.210127571	0.136638133	0.210127571	-0.497696309
ENSG00000111554	MDM1	2.97E-05	0.000465095	0.121810289	4.061560003	0.189460676	0.015957077	0.109112804	0.214488681	0.214488681	-0.508637371
ENSG00000163576	EFHB	3.10E-05	0.000483429	0.158001827	5.909822404	0.481296102	0.008858441	0.378867615	0.120257011	0.378867615	-0.658281784
ENSG00000179869	ABCA13	3.13E-05	0.000487042	0.115483239	6.928436489	0.258711491	0.002019074	0.205108865	0.120509137	0.205108865	-0.480889031
ENSG00000235162	C12orf75	3.14E-05	0.000488829	0.16170223	6.06705928	0.514439325	0.004250563	0.401849251	0.119263751	0.401849251	-0.673180311
ENSG00000141040	ZNF287	3.20E-05	0.000497364	0.173865574	3.189989813	0.503426098	0.084225566	0.295363922	0.385266188	0.385266188	-0.723091266
ENSG00000197296	FITM2	3.32E-05	0.00051357	0.121151993	4.167459854	0.208879127	0.025738988	0.122346101	0.202222716	0.202222716	-0.502809772
ENSG00000187957	DNER	3.32E-05	0.00051357	0.133225306	4.707711832	0.365948327	0.008443978	0.267216322	0.157201427	0.267216322	-0.552945933
ENSG00000167904	TMEM68	3.43E-05	0.000528004	0.109604687	4.452405688	0.202466834	0.011510669	0.140428107	0.175066724	0.175066724	-0.454067971
ENSG00000052802	MSMO1	3.50E-05	0.00053619	0.107027114	5.114717565	0.231613659	0.004087346	0.173817755	0.137483005	0.173817755	-0.442917112
ENSG00000185250	PPIL6	3.52E-05	0.000538156	0.132553275	5.714841287	0.337645178	0.006759999	0.266126278	0.122425841	0.266126278	-0.548380243
ENSG00000077232	DNAJC10	3.56E-05	0.000542286	0.094674972	7.262802426	0.154765087	0.015512091	0.103193128	0.123698135	0.123698135	-0.391428338
ENSG00000122042	UBL3	3.74E-05	0.000567787	0.088132836	6.689607954	0.106230945	0.001459758	0.05916863	0.119176055	0.119176055	-0.363351952
ENSG00000169895	SYAP1	3.77E-05	0.000570791	0.109260385	6.217299102	0.247960539	0.001873114	0.183533926	0.118765193	0.183533926	-0.450299311
ENSG00000135929	CYP27A1	3.78E-05	0.000572669	0.139870083	5.432487949	0.39062167	0.003827342	0.300016499	0.127988075	0.300016499	-0.576315763
ENSG00000165626	BEND7	3.91E-05	0.000590143	0.107303428	4.743141204	0.142395329	0.023690943	0.074858155	0.155133947	0.155133947	-0.441338551
ENSG00000250305	TRMT9B	3.94E-05	0.000594591	0.171048964	4.365133758	0.571242734	0.028180789	0.426222708	0.18257238	0.426222708	-0.703189683
ENSG00000186205	MTARC1	4.01E-05	0.0006024	0.170441119	4.46685289	0.665399786	0.037990671	0.413189003	0.17388965	0.413189003	-0.699990654
ENSG00000035115	SH3YL1	4.02E-05	0.000603006	0.094839776	5.199059947	0.163211233	0.005162725	0.126493013	0.13453258	0.13453258	-0.389419415
ENSG00000089009	RPL6	4.04E-05	0.000603664	0.095015079	8.127194123	0.169997058	0.000297687	0.129977122	0.139914523	0.139914523	-0.390071233
ENSG00000181322	NME9	4.12E-05	0.000614041	0.14576154	4.81020474	0.410614874	0.01373025	0.316249027	0.151432926	0.316249027	-0.597734233
ENSG00000214456	PLIN5	4.16E-05	0.000619091	0.159495094	4.508069833	0.554788481	0.01151151	0.383577932	0.170654926	0.383577932	-0.653715416
ENSG00000164542	MATCAP2	4.19E-05	0.000623028	0.133147297	3.755264206	0.282629398	0.015808893	0.200862289	0.259528677	0.259528677	-0.545460441
ENSG00000178568	ERBB4	4.28E-05	0.000634119	0.178737586	3.194951285	0.609806785	0.029155031	0.467017303	0.38398715	0.467017303	-0.731358407
ENSG00000065150	IPO5	4.31E-05	0.000637349	0.122481018	3.986106332	0.171783281	0.008915552	0.102089773	0.224075019	0.224075019	-0.500997015
ENSG00000066777	ARFGEF1	4.32E-05	0.000639515	0.091045663	5.778594719	0.13431028	0.007158791	0.093522601	0.121582925	0.121582925	-0.372322375
ENSG00000134779	TPGS2	4.34E-05	0.000640428	0.088397629	6.171370761	0.142899181	0.002481572	0.111338927	0.118880227	0.118880227	-0.361445183
ENSG00000165097	KDM1B	4.36E-05	0.000643622	0.096038474	5.284783	0.141287713	0.011362413	0.093009934	0.13188648	0.13188648	-0.392555935
ENSG00000111319	SCNN1A	4.38E-05	0.000645591	0.088297138	5.911442289	0.123139331	0.000842292	0.093166831	0.120243734	0.120243734	-0.360831716
ENSG00000169402	RSPH10B2	4.42E-05	0.000650127	0.196239589	3.263565607	0.730973409	0.061498237	0.536602063	0.366926697	0.536602063	-0.801499602
ENSG00000112339	HBS1L	4.49E-05	0.000656842	0.10072181	4.819056736	0.142395125	0.006597183	0.086340897	0.150963484	0.150963484	-0.41100722
ENSG00000132554	RGS22	4.49E-05	0.000656842	0.166681447	3.899105503	0.545227651	0.026687706	0.404806822	0.236094849	0.404806822	-0.680178561
ENSG00000174721	FGFBP3	4.51E-05	0.000658146	0.150904757	3.758892076	0.449741436	0.039011104	0.314665741	0.258877648	0.314665741	-0.615677737
ENSG00000167525	PROCA1	4.52E-05	0.000659276	0.156636721	3.400443521	0.417361735	0.046400334	0.276515502	0.334654903	0.334654903	-0.638937573
ENSG00000058085	LAMC2	4.70E-05	0.000682935	0.088573289	6.423227634	0.149134899	0.001030589	0.120814018	0.118585031	0.120814018	-0.360479684
ENSG00000198624	CCDC69	4.73E-05	0.000685608	0.088606008	6.113853939	0.127595213	0.002865991	0.076641654	0.119068652	0.119068652	-0.360513331
ENSG00000188316	ENO4	4.75E-05	0.000688007	0.138122908	4.579065532	0.366299646	0.028407631	0.26789274	0.165479791	0.26789274	-0.561842096
ENSG00000178425	NT5DC1	4.79E-05	0.000693747	0.126187213	3.942356766	0.221170362	0.0173208	0.12949647	0.229983384	0.229983384	-0.513020098
ENSG00000123836	PFKFB2	5.18E-05	0.000748359	0.19380362	2.594301391	0.583743528	0.018760918	0.389002457	0.564582816	0.564582816	-0.784362545
ENSG00000254122	PCDHGB7	5.21E-05	0.000752181	0.369046981	1.582899815	2.584220268	0.193881711	1.921379882	0.787149441	1.921379882	-1.493089142
ENSG00000091622	PITPNM3	5.36E-05	0.000770322	0.110762383	5.36618482	0.230945846	0.007072734	0.18346691	0.129648089	0.18346691	-0.447385835
ENSG00000179813	FAM216B	5.39E-05	0.000773963	0.169414409	6.864971563	0.548855832	0.001902298	0.443858078	0.120079655	0.443858078	-0.68406684
ENSG00000068885	IFT80	5.50E-05	0.000786546	0.132369837	3.765045813	0.205423103	0.014351412	0.120870609	0.257780103	0.257780103	-0.533910908
ENSG00000291139	DPY19L2P2	5.51E-05	0.000786945	0.119402874	4.256910442	0.268860159	0.028583839	0.190048446	0.192843035	0.192843035	-0.481561346
ENSG00000187240	DYNC2H1	5.66E-05	0.000806244	0.173395134	6.580602603	0.579765707	0.012891712	0.454062806	0.118821167	0.454062806	-0.698219148
ENSG00000161249	DMKN	5.67E-05	0.000807179	0.108972786	6.825623184	0.228302349	0.002154894	0.182277361	0.119840884	0.182277361	-0.438753638
ENSG00000236287	ZBED5	5.76E-05	0.000818803	0.097649334	4.976707421	0.079416748	0.004876779	0.036439059	0.143217862	0.143217862	-0.392792641
ENSG00000228253	MT-ATP8	5.89E-05	0.000833834	0.14022221	8.327668468	0.381200273	0.000311511	0.305064125	0.145566254	0.305064125	-0.563322324
ENSG00000284776		5.89E-05	0.000834083	0.382983081	2.942832253	2.877152528	0.32421063	1.953822032	0.455492667	1.953822032	-1.538471429
ENSG00000109084	TMEM97	5.93E-05	0.000836726	0.145316652	3.561524864	0.263176179	0.029800736	0.133747074	0.298167312	0.298167312	-0.583547945
ENSG00000140057	AK7	6.01E-05	0.000846836	0.124221658	5.162702632	0.297199485	0.006545024	0.233114897	0.135758653	0.233114897	-0.498406866
ENSG00000124343	XG	6.03E-05	0.000848837	0.245792537	0.954806578	0.834387357	0.109286804	0.470907281	0.829005502	0.829005502	-0.985989874
ENSG00000186471	AKAP14	6.09E-05	0.000855769	0.163152359	6.02100586	0.512551061	0.006512915	0.406903278	0.119497165	0.406903278	-0.654133767
ENSG00000259171		6.12E-05	0.000858839	0.49790462	2.453797406	4.942858738	1.032053762	2.818233044	0.60525623	2.818233044	-1.99574527
ENSG00000177990	DPY19L2	6.18E-05	0.000867354	0.153213892	3.503676634	0.426922471	0.053645852	0.274712129	0.310937689	0.310937689	-0.613736364
ENSG00000165672	PRDX3	6.27E-05	0.000878212	0.088411388	6.864523016	0.1053206	0.001322766	0.072721598	0.120076815	0.120076815	-0.353856882
ENSG00000240303	ACAD11	6.34E-05	0.000887056	0.115911488	4.372447089	0.258284351	0.014277796	0.194389184	0.181917874	0.194389184	-0.463624068
ENSG00000171533	MAP6	6.38E-05	0.000892247	0.172555223	6.916271954	0.579836318	0.002884753	0.459556947	0.120422555	0.459556947	-0.689914041
ENSG00000146729	NIPSNAP2	6.42E-05	0.000896284	0.096889252	4.997027949	0.137046579	0.003503789	0.08992871	0.142294349	0.142294349	-0.38726098
ENSG00000171227	TMEM37	6.43E-05	0.000898009	0.156907118	4.374227202	0.474509235	0.011877132	0.370494849	0.18175929	0.370494849	-0.627045005
ENSG00000258539		6.50E-05	0.000906233	0.290552843	1.882650562	1.627775402	0.392967651	0.918178268	0.738728807	0.918178268	-1.160442949
ENSG00000104237	RP1	6.52E-05	0.000907776	0.147072968	4.635287104	0.409044133	0.006832708	0.32911098	0.161701932	0.32911098	-0.587276325
ENSG00000196136	SERPINA3	6.53E-05	0.000907958	0.383399638	4.873126498	3.387166707	0.058069998	2.224920831	0.148182968	2.224920831	-1.530842883
ENSG00000119227	PIGZ	6.53E-05	0.000907958	0.162660919	3.618883678	0.524706363	0.067730738	0.343198663	0.286001142	0.343198663	-0.649445331
ENSG00000122642	FKBP9	6.55E-05	0.000909476	0.109347304	4.458193961	0.131435415	0.011109796	0.074478991	0.174592352	0.174592352	-0.436517677
ENSG00000285501	AGBL2	6.67E-05	0.000925791	0.150154786	4.062725727	0.432183333	0.010512566	0.339657589	0.214346314	0.339657589	-0.598757996
ENSG00000053254	FOXN3	6.75E-05	0.000935412	0.125188805	3.950779287	0.16958756	0.014581125	0.09293503	0.228825141	0.228825141	-0.498870346
ENSG00000137154	RPS6	6.76E-05	0.000935914	0.116866501	9.104538852	0.272059865	0.000216747	0.211902881	0.175977075	0.211902881	-0.465667391
ENSG00000010404	IDS	6.81E-05	0.000940308	0.102083193	5.526268752	0.207845813	0.004624111	0.157224607	0.125838996	0.157224607	-0.406584817
ENSG00000047315	POLR2B	6.86E-05	0.000945459	0.105640249	4.563816233	0.104274378	0.006772813	0.048492585	0.166551547	0.166551547	-0.420572006
ENSG00000016864	GLT8D1	7.14E-05	0.000980649	0.090046263	5.7857987	0.126806108	0.004434471	0.092828954	0.121496386	0.121496386	-0.357613528
ENSG00000070540	WIPI1	7.18E-05	0.000984284	0.096216556	5.217882788	0.174401313	0.009857387	0.122653332	0.133923243	0.133923243	-0.381991714
ENSG00000147853	AK3	7.20E-05	0.00098461	0.091420389	5.607135801	0.1486516	0.005609885	0.115708765	0.124193764	0.124193764	-0.362896082
ENSG00000176401	EID2B	7.20E-05	0.00098461	0.179532868	3.263805131	0.604445492	0.070164054	0.430433485	0.366869253	0.430433485	-0.712647736
ENSG00000205177	C11orf91	7.25E-05	0.000990168	0.286591929	1.545871729	1.53993313	0.229163981	1.046477644	0.79191531	1.046477644	-1.137170686
ENSG00000203963	C1orf141	7.31E-05	0.000997197	0.201068491	4.620517024	0.773970937	0.036168768	0.591728809	0.162668944	0.591728809	-0.797400033
ENSG00000197565	COL4A6	7.36E-05	0.001001009	0.204485908	4.254966625	0.824916274	0.042395465	0.607027348	0.193037957	0.607027348	-0.810641461
ENSG00000083457	ITGAE	7.39E-05	0.001003823	0.099695124	4.953216823	0.160310964	0.010057697	0.117435803	0.144307219	0.144307219	-0.39513326
ENSG00000182534	MXRA7	7.50E-05	0.001017875	0.093065544	6.527429638	0.174500119	0.002644419	0.131873028	0.118704998	0.131873028	-0.368529663
ENSG00000146802	TMEM168	7.56E-05	0.001025141	0.18441609	2.818788611	0.305587841	0.03406995	0.134585471	0.494130043	0.494130043	-0.729879592
ENSG00000163378	EOGT	7.64E-05	0.001033472	0.103122159	4.779239152	0.168706036	0.012050856	0.117988166	0.153109103	0.153109103	-0.407894093
ENSG00000172425	TTC36	7.74E-05	0.00104308	0.293149914	2.125303185	1.823602693	0.170201725	1.16448798	0.687806108	1.16448798	-1.158592125
ENSG00000183762	KREMEN1	7.78E-05	0.001047497	0.153713971	4.061799673	0.538875502	0.0080977	0.358869676	0.214459397	0.358869676	-0.607324415
ENSG00000198125	MB	7.87E-05	0.001057577	0.169153703	5.530106794	0.548289505	0.004801875	0.439587625	0.125755172	0.439587625	-0.667870551
ENSG00000133065	SLC41A1	7.94E-05	0.001065491	0.104524533	5.19238705	0.20551915	0.008844321	0.160838253	0.134752676	0.160838253	-0.412487043
ENSG00000110696	C11orf58	7.97E-05	0.001068642	0.094124736	6.010605653	0.167641388	0.004595113	0.133001681	0.119556018	0.133001681	-0.37136052
ENSG00000186230	ZNF749	8.17E-05	0.001092285	0.248776398	3.075784737	1.161920703	0.07774786	0.883464004	0.416255903	0.883464004	-0.980007921
ENSG00000138160	KIF11	8.19E-05	0.001092285	0.137161551	4.11795883	0.355238622	0.029816611	0.262373519	0.207791575	0.262373519	-0.540244881
ENSG00000147400	CETN2	8.18E-05	0.001092285	0.126243268	7.713877812	0.303078153	0.000562539	0.246961409	0.130620806	0.246961409	-0.49729087
ENSG00000049540	ELN	8.19E-05	0.001092285	0.142370359	4.53425177	0.401548069	0.012671949	0.302131824	0.168690438	0.302131824	-0.560783911
ENSG00000114446	IFT57	8.32E-05	0.0011074	0.105390833	5.794599004	0.211902356	0.001914599	0.17059229	0.121392973	0.17059229	-0.414717891
ENSG00000070731	ST6GALNAC2	8.50E-05	0.001126398	0.126331991	4.969779807	0.308779117	0.005482994	0.242388995	0.143537101	0.242388995	-0.496479053
ENSG00000178125	PPP1R42	8.51E-05	0.001127647	0.154166233	5.071542646	0.449579837	0.012494731	0.356635226	0.139146573	0.356635226	-0.605794384
ENSG00000166828	SCNN1G	8.58E-05	0.001133979	0.194621204	4.254881249	0.742874692	0.034466596	0.553809333	0.193046528	0.553809333	-0.764382711
ENSG00000124767	GLO1	8.63E-05	0.001138113	0.08847218	6.14694769	0.108101922	0.002612796	0.077074103	0.118953793	0.118953793	-0.347347607
ENSG00000137210	TMEM14B	8.68E-05	0.001142354	0.087975339	6.482929737	0.122362232	0.001568689	0.085184797	0.118636348	0.118636348	-0.345291571
ENSG00000165124	SVEP1	8.94E-05	0.001175079	0.188119079	3.784639091	0.657597814	0.015871126	0.533753845	0.254342854	0.533753845	-0.736969328
ENSG00000083750	RRAGB	9.30E-05	0.001216916	0.138993752	3.798962246	0.283986655	0.048162222	0.154769026	0.251886185	0.251886185	-0.543220618
ENSG00000117620	SLC35A3	9.29E-05	0.001216916	0.104330519	5.878397597	0.205401015	0.006086149	0.162967095	0.120528647	0.162967095	-0.407777222
ENSG00000163006	CCDC138	9.30E-05	0.001216916	0.108680335	4.825898734	0.226306534	0.01966262	0.163781039	0.150603489	0.163781039	-0.424736614
ENSG00000155016	CYP2U1	9.33E-05	0.001219079	0.143011022	3.660096652	0.284467482	0.040030974	0.177375793	0.277612392	0.277612392	-0.558815525
ENSG00000106070	GRB10	9.58E-05	0.00124581	0.167360571	4.498876299	0.596791753	0.033983346	0.401034492	0.171361048	0.401034492	-0.652884103
ENSG00000169282	KCNAB1	9.62E-05	0.001250087	0.24240547	1.251874729	0.859116644	0.09294092	0.517283483	0.819669875	0.819669875	-0.945389869
ENSG00000154079	SDHAF4	9.66E-05	0.001253938	0.114205195	4.291099955	0.205800434	0.013092322	0.147458887	0.189476446	0.189476446	-0.445274036
ENSG00000165807	PPP1R36	9.72E-05	0.001258704	0.185977605	5.018127599	0.660022515	0.019687626	0.517495139	0.141365367	0.517495139	-0.724862765
ENSG00000179387	ELMOD2	9.71E-05	0.001258704	0.134636558	3.758743081	0.20192522	0.022627026	0.096186157	0.258904328	0.258904328	-0.524777027
ENSG00000125434	SLC25A35	9.77E-05	0.001263676	0.129571638	4.114579442	0.217844428	0.052565717	0.103273517	0.208182093	0.208182093	-0.504841056
ENSG00000127914	AKAP9	0.000100819	0.001293479	0.102920833	8.20538868	0.197401438	0.003386858	0.161128844	0.14202461	0.161128844	-0.400219193
ENSG00000176903	PNMA1	0.000101545	0.001301737	0.101304921	6.551223311	0.190066989	0.001953344	0.157436943	0.11875238	0.157436943	-0.393759167
ENSG00000284468	SLC25A24	0.000102751	0.001312972	0.12876144	4.695204597	0.308693584	0.006361934	0.251135212	0.157951442	0.251135212	-0.500109559
ENSG00000085491	SLC25A24	0.000102751	0.001312972	0.12876144	4.695204597	0.308693584	0.006361934	0.251135212	0.157951442	0.251135212	-0.500109559
ENSG00000171100	MTM1	0.000102604	0.001312972	0.105794186	4.663665651	0.192871757	0.013937731	0.143811791	0.159892127	0.159892127	-0.410941634
ENSG00000144455	SUMF1	0.000103624	0.001322001	0.092354604	5.391580314	0.101158604	0.003473541	0.058423772	0.128996562	0.128996562	-0.358515472
ENSG00000188013	MEIS3P2	0.000104009	0.001324783	0.299489167	2.802399047	1.705930642	0.109174979	1.283863159	0.499314216	1.283863159	-1.162330577
ENSG00000183283	DAZAP2	0.000104358	0.001328156	0.090577548	6.805965651	0.17278845	0.000480655	0.126940604	0.119729443	0.126940604	-0.351461769
ENSG00000182704	TSKU	0.000105598	0.001338586	0.137340688	6.653099451	0.352436891	0.003670188	0.28928366	0.11903966	0.28928366	-0.53251865
ENSG00000187134	AKR1C1	0.000106025	0.001342931	0.161501953	6.615624255	0.493444583	0.002425076	0.402669406	0.118918039	0.402669406	-0.626041729
ENSG00000164930	FZD6	0.000106378	0.001345254	0.10045913	5.423958771	0.186878683	0.004436346	0.152303566	0.128194393	0.152303566	-0.389335793
ENSG00000008710	PKD1	0.000106682	0.001346956	0.152520182	4.486368695	0.455127323	0.016747006	0.344542543	0.172335731	0.344542543	-0.590995752
ENSG00000164070	HSPA4L	0.000108593	0.001364582	0.130202938	3.95763641	0.320621693	0.029704791	0.233590041	0.227889562	0.233590041	-0.50395609
ENSG00000189045	ANKDD1B	0.000110171	0.001383317	0.14600305	4.68172518	0.39797907	0.017642674	0.313430984	0.158772055	0.313430984	-0.564597477
ENSG00000079974	RABL2B	0.000110294	0.001383772	0.103322564	6.798269536	0.199800109	0.002686144	0.163116373	0.119687232	0.163116373	-0.399522762
ENSG00000165028	NIPSNAP3B	0.000112831	0.001408919	0.204745963	2.637068152	0.449044482	0.099631443	0.186832782	0.551444227	0.551444227	-0.790565546
ENSG00000179941	BBS10	0.000113138	0.001410543	0.123118305	4.071718016	0.208971205	0.022167654	0.136730099	0.213253793	0.213253793	-0.475302793
ENSG00000109929	SC5D	0.000113572	0.001413741	0.098202236	5.032641036	0.166054892	0.009032416	0.120287367	0.140744031	0.140744031	-0.37902142
ENSG00000132561	MATN2	0.000114842	0.001428428	0.165261211	3.278796398	0.481544742	0.06086854	0.334854548	0.363304078	0.363304078	-0.637393122
ENSG00000109576	AADAT	0.000115261	0.00143152	0.164473762	3.410878579	0.540097454	0.064899433	0.35524056	0.332217977	0.35524056	-0.634209754
ENSG00000109906	ZBTB16	0.000115271	0.00143152	0.251731647	4.257408208	1.200574803	0.063940846	0.920243393	0.192793182	0.920243393	-0.970670072
ENSG00000215018	COL28A1	0.000116696	0.001448088	0.163335877	4.312402335	0.49740897	0.020938838	0.393407921	0.187436836	0.393407921	-0.629327406
ENSG00000174483	BBS1	0.000118968	0.001471105	0.206824371	3.922088628	0.793934766	0.131248845	0.533112251	0.232812187	0.533112251	-0.795910259
ENSG00000105875	WDR91	0.000119909	0.001478728	0.126922346	4.658785333	0.311367489	0.041975526	0.20821851	0.160198967	0.20821851	-0.488182853
ENSG00000163491	NEK10	0.000120685	0.001487135	0.145937814	5.770295695	0.402689178	0.008645493	0.322132374	0.121684749	0.322132374	-0.561091658
ENSG00000169213	RAB3B	0.00012187	0.0014971	0.152259045	5.451664361	0.429569915	0.007071673	0.352981773	0.127531358	0.352981773	-0.585030021
ENSG00000272514	CFAP206	0.000126286	0.001540626	0.154301483	6.153535116	0.445400133	0.011827518	0.357950395	0.118933048	0.357950395	-0.591528908
ENSG00000153832	FBXO36	0.00013087	0.00159289	0.118129385	5.392833885	0.269999512	0.006538437	0.210190376	0.128964925	0.210190376	-0.451823045
ENSG00000112379	ARFGEF3	0.000132668	0.001612135	0.088181505	6.518509406	0.135385121	0.002079932	0.10776254	0.118689153	0.118689153	-0.336981454
ENSG00000198755	RPL10A	0.000132756	0.001612135	0.102455922	8.810780322	0.189407428	0.000305098	0.146226462	0.162727671	0.162727671	-0.391513736
ENSG00000139508	SLC46A3	0.000133897	0.001623517	0.094434819	5.307206638	0.153466866	0.007259476	0.113864825	0.131245403	0.131245403	-0.360663359
ENSG00000172007	RAB33B	0.000134149	0.001625334	0.14610015	4.51135886	0.399520747	0.047470485	0.284043681	0.170404396	0.284043681	-0.557914643
ENSG00000286190		0.000135512	0.001640597	0.176998574	5.727471525	0.603549085	0.011108486	0.475455883	0.122247523	0.475455883	-0.675465286
ENSG00000112992	NNT	0.000135979	0.001644995	0.119964148	5.561663501	0.281814061	0.029731267	0.193782211	0.125083885	0.193782211	-0.457707591
ENSG00000179277	MEIS3P1	0.000139534	0.00168033	0.347508578	2.265876499	2.28266102	0.155329838	1.720233901	0.654172932	1.720233901	-1.323657555
ENSG00000096092	TMEM14A	0.000142943	0.001714883	0.133712919	5.392574425	0.346190194	0.007328199	0.270353659	0.128971469	0.270353659	-0.508512888
ENSG00000110328	GALNT18	0.000143212	0.001716821	0.11152379	4.855269416	0.248535602	0.009135407	0.184032872	0.149085354	0.184032872	-0.424075164
ENSG00000088930	XRN2	0.000144221	0.001722741	0.088356744	6.379521058	0.150749471	0.002081664	0.119167898	0.118577037	0.119167898	-0.335827707
ENSG00000161847	RAVER1	0.000144248	0.001722741	0.161742216	3.300449966	0.490654216	0.030181155	0.376119525	0.358201904	0.376119525	-0.614744696
ENSG00000112473	SLC39A7	0.000144393	0.001723172	0.187287165	4.055669429	0.651463984	0.076577208	0.468197331	0.215210686	0.468197331	-0.711788666
ENSG00000135597	REPS1	0.000146541	0.001747499	0.122311561	5.739071266	0.289043533	0.013407432	0.218938881	0.122088782	0.218938881	-0.464399771
ENSG00000198786	MT-ND5	0.000147426	0.001755418	0.139670112	10.50247637	0.362271408	3.35E-05	0.302942181	0.280597846	0.302942181	-0.530099156
ENSG00000166295	ANAPC16	0.000152098	0.001804293	0.094369748	7.972981357	0.116368952	0.002222796	0.074393178	0.136091272	0.136091272	-0.357436603
ENSG00000143164	DCAF6	0.000152921	0.001811349	0.093745302	5.32258716	0.096887717	0.005672852	0.052728271	0.130816822	0.130816822	-0.354945726
ENSG00000290502	SORD2P	0.000154885	0.001830518	0.346047188	3.264922908	2.239088155	0.111226469	1.748595693	0.36660138	1.748595693	-1.309132506
ENSG00000109466	KLHL2	0.000159947	0.001881653	0.178086207	5.492965869	0.649672779	0.006620164	0.48594233	0.126578973	0.48594233	-0.672292151
ENSG00000110200	ANAPC15	0.000160481	0.001882802	0.093657774	6.345264108	0.175019151	0.004658356	0.131576561	0.118588227	0.131576561	-0.353489137
ENSG00000188452	CERKL	0.000163347	0.001912051	0.110839153	4.551777986	0.211417434	0.023391277	0.146968257	0.167412587	0.167412587	-0.41784674
ENSG00000139842	CUL4A	0.000165278	0.001930384	0.096710737	5.01823106	0.135667038	0.003900488	0.101092876	0.141360888	0.141360888	-0.364301068
ENSG00000058453	CROCC	0.000166034	0.001937793	0.187509048	5.193064481	0.655050029	0.011144051	0.534922062	0.134730233	0.534922062	-0.70611673
ENSG00000116251	RPL22	0.00016954	0.00197004	0.091701621	7.638796531	0.161640032	0.001356491	0.12092461	0.129247003	0.129247003	-0.344848501
ENSG00000140718	FTO	0.000173554	0.002010394	0.110677614	5.269258541	0.225504071	0.009963741	0.180284369	0.132342079	0.180284369	-0.415560417
ENSG00000100218	RSPH14	0.00017656	0.002035243	0.157896603	4.767178013	0.470317433	0.00895112	0.378258682	0.153776882	0.378258682	-0.592173741
ENSG00000163322	ABRAXAS1	0.000178611	0.002057391	0.11443923	4.433798449	0.209129165	0.026787449	0.117853701	0.176612399	0.176612399	-0.428860186
ENSG00000145675	PIK3R1	0.000180465	0.002077247	0.109708313	4.660451368	0.229651299	0.013530165	0.173400195	0.160094016	0.173400195	-0.410846702
ENSG00000186889	TMEM17	0.000181101	0.002083059	0.112148938	4.459231904	0.193675164	0.020832279	0.133586563	0.174507683	0.174507683	-0.419887529
ENSG00000288516	PRKACA	0.000181616	0.002087468	0.341395358	3.222556557	2.246501499	0.333944949	1.476211007	0.376980611	1.476211007	-1.277946722
ENSG00000136158	SPRY2	0.000183085	0.002102829	0.123478091	4.6803993	0.330021946	0.016710758	0.220088634	0.158853476	0.220088634	-0.461966225
ENSG00000198081	ZBTB14	0.000183873	0.00211022	0.125992078	3.975074736	0.163418482	0.021000074	0.09198584	0.225539842	0.225539842	-0.471235684
ENSG00000154252	GAL3ST2	0.000183994	0.00211022	0.313555705	2.681377489	1.852199447	0.387847075	1.139121793	0.537609047	1.139121793	-1.172709686
ENSG00000172785	ZNG1A	0.000185342	0.002121089	0.090360696	6.053706554	0.120848738	0.007484866	0.08563192	0.119327002	0.119327002	-0.337786442
ENSG00000182606	TRAK1	0.000188379	0.002152749	0.088771	7.046794496	0.084757699	0.00093112	0.055392062	0.121458052	0.121458052	-0.331480807
ENSG00000117592	PRDX6	0.000191014	0.002179722	0.089105401	7.138462294	0.101575513	0.000985594	0.069722896	0.122327397	0.122327397	-0.332417865
ENSG00000143252	SDHC	0.000191652	0.002185438	0.08817855	6.055922751	0.064490795	0.001444733	0.03323384	0.119316261	0.119316261	-0.328886009
ENSG00000116459	ATP5PB	0.000192834	0.002197342	0.088693364	6.965036971	0.09134317	0.001393296	0.057533136	0.120781893	0.120781893	-0.330668698
ENSG00000164038	SLC9B2	0.00019304	0.00219811	0.253572595	1.339061318	0.979239255	0.185294349	0.586390484	0.813337472	0.813337472	-0.945307208
ENSG00000145022	TCTA	0.000193903	0.002206364	0.092590194	5.335383814	0.114158958	0.002679933	0.079495808	0.130466874	0.130466874	-0.34506787
ENSG00000120327	PCDHB14	0.000196306	0.002232101	0.171085586	3.194813581	0.325140902	0.070575526	0.147835961	0.384022569	0.384022569	-0.637075431
ENSG00000244607	CCDC13	0.000196971	0.002238065	0.123323099	4.111261739	0.282240468	0.027638499	0.201450396	0.208566795	0.208566795	-0.459115842
ENSG00000127252	PLAAT1	0.000197307	0.002238684	0.282938646	2.613709737	1.529534549	0.1834087	1.059918149	0.5586515	1.059918149	-1.053221953
ENSG00000154309	DISP1	0.000197574	0.002240116	0.107326821	4.675771166	0.168344302	0.019764183	0.105851082	0.159138684	0.159138684	-0.399480931
ENSG00000122026	RPL21	0.000198115	0.002244642	0.101197247	8.712893172	0.183843329	0.000239579	0.143033447	0.158812066	0.158812066	-0.37659628
ENSG00000179029	TMEM107	0.000201163	0.002274314	0.128386703	5.141069809	0.315212984	0.007485356	0.248515174	0.136520507	0.248515174	-0.477284196
ENSG00000172985	SH3RF3	0.000205635	0.002319921	0.232014957	3.986921496	1.005374186	0.044069618	0.791981312	0.223967436	0.791981312	-0.861237617
ENSG00000112640	PPP2R5D	0.000210593	0.002370812	0.132373167	4.785530459	0.319467927	0.033901505	0.238243701	0.152764157	0.238243701	-0.490569422
ENSG00000107643	MAPK8	0.000211349	0.002377636	0.120973582	4.318099848	0.271943853	0.029307877	0.197982918	0.18689871	0.197982918	-0.448213215
ENSG00000100784	RPS6KA5	0.000212113	0.002382863	0.144040413	3.634440967	0.279622031	0.039434764	0.161493823	0.282797845	0.282797845	-0.533545147
ENSG00000119636	BBOF1	0.000212637	0.002385487	0.134626779	4.732606295	0.339545906	0.00634833	0.27514213	0.155740131	0.27514213	-0.498591625
ENSG00000086289	EPDR1	0.000212647	0.002385487	0.232024838	3.048521264	0.995514453	0.04209308	0.794029067	0.424055898	0.794029067	-0.859303522
ENSG00000135070	ISCA1	0.000216268	0.002415884	0.096587996	5.05434459	0.104111301	0.005052043	0.058999595	0.139840849	0.139840849	-0.357299642
ENSG00000198034	RPS4X	0.000218677	0.00243621	0.100986639	7.617594311	0.185402666	0.000312089	0.158078219	0.128875617	0.158078219	-0.373287117
ENSG00000132970	WASF3	0.000220714	0.00245519	0.235210259	1.946923752	1.22236653	0.120156779	0.739080852	0.726192848	0.739080852	-0.868877519
ENSG00000286022		0.000222326	0.002471399	0.145153985	4.926133193	0.399115135	0.016319513	0.310914695	0.145588487	0.310914695	-0.535936895
ENSG00000277005		0.00022506	0.002493067	0.431916246	1.515196459	3.619012528	0.292494056	2.604848523	0.795652518	2.604848523	-1.593376827
ENSG00000112183	RBM24	0.000227618	0.002513676	0.165697041	4.004534213	0.515618268	0.023214192	0.40319865	0.221664831	0.40319865	-0.610794118
ENSG00000257103	LSM14A	0.000227711	0.002513676	0.104156273	5.154084494	0.174784848	0.032429844	0.100170551	0.136059185	0.136059185	-0.383931128
ENSG00000006757	PNPLA4	0.000231318	0.002551726	0.13014722	5.811975604	0.333839078	0.023340527	0.23972901	0.121196089	0.23972901	-0.479215404
ENSG00000135775	COG2	0.000235943	0.002597334	0.094183968	5.440356804	0.080637246	0.009970538	0.042844311	0.127799487	0.127799487	-0.346319544
ENSG00000080503	SMARCA2	0.000238718	0.002622436	0.092401449	5.484640013	0.093403734	0.005836803	0.047383527	0.126767718	0.126767718	-0.339489303
ENSG00000230062	ANKRD66	0.00024178	0.002652405	0.177018383	6.208048902	0.570299977	0.007136095	0.479537193	0.118786065	0.479537193	-0.649801419
ENSG00000100425	BRD1	0.000242043	0.002652751	0.091479838	5.664778731	0.103911724	0.006781654	0.073131464	0.123190868	0.123190868	-0.335779996
ENSG00000165475	CRYL1	0.000245366	0.002686183	0.112819932	6.09542538	0.243400792	0.003644768	0.194039651	0.119140715	0.194039651	-0.413716195
ENSG00000182093	GET1	0.000245879	0.002689941	0.100636185	6.092395388	0.18855889	0.004747573	0.152545321	0.119153144	0.152545321	-0.368984082
ENSG00000163075	CFAP221	0.000246377	0.002693538	0.158185225	5.177364004	0.462151709	0.010451089	0.378175584	0.135256228	0.378175584	-0.579906577
ENSG00000122970	IFT81	0.000246577	0.002693872	0.124204846	5.596047691	0.290173398	0.008603097	0.23099196	0.124402511	0.23099196	-0.455308814
ENSG00000153896	ZNF599	0.000247357	0.002700537	0.123680988	5.229077844	0.279744413	0.020939751	0.216638491	0.133568692	0.216638491	-0.453288504
ENSG00000074696	HACD3	0.000247698	0.002702411	0.106283237	5.602996836	0.212755066	0.003319403	0.172121282	0.12427107	0.172121282	-0.389488522
ENSG00000184012	TMPRSS2	0.000248892	0.002711717	0.088743025	6.973465889	0.145225317	0.001464725	0.115271391	0.12084732	0.12084732	-0.325100916
ENSG00000163521	GLB1L	0.000252114	0.002744934	0.144201698	4.890629327	0.386118044	0.006353986	0.316600647	0.147312791	0.316600647	-0.527793056
ENSG00000165506	DNAAF2	0.000253474	0.002757849	0.114377776	5.415174359	0.242072687	0.006527098	0.196654357	0.12840901	0.196654357	-0.418476772
ENSG00000168615	ADAM9	0.000253735	0.002758133	0.192877089	5.56277647	0.680501633	0.013509735	0.564269665	0.125061007	0.564269665	-0.705633139
ENSG00000180228	PRKRA	0.000253847	0.002758133	0.091352155	5.616052153	0.104093053	0.005580264	0.074399891	0.124029691	0.124029691	-0.334197923
ENSG00000214198	TTC41P	0.000254983	0.00276481	0.176630028	3.197506425	0.582685805	0.101209464	0.37847689	0.383330773	0.383330773	-0.645971757
ENSG00000188817	SNTN	0.000256409	0.002778381	0.159476611	7.982408248	0.465064984	0.000849066	0.394148816	0.136312453	0.394148816	-0.583010081
ENSG00000281935	DNAH10	0.000257328	0.002786432	0.200132246	4.631407982	0.730860502	0.015039344	0.607024425	0.161954204	0.607024425	-0.731454256
ENSG00000148057	IDNK	0.00026187	0.002829829	0.100033918	4.93714597	0.162278434	0.01035176	0.109363337	0.145064096	0.145064096	-0.365160152
ENSG00000169989	TIGD4	0.000264965	0.002857446	0.22456302	2.529713639	0.915708586	0.149389112	0.633819133	0.583847824	0.633819133	-0.819058707
ENSG00000100129	EIF3L	0.000268699	0.002881539	0.099813961	6.848847565	0.185504101	0.004563489	0.150169657	0.119979276	0.150169657	-0.363696659
ENSG00000291007		0.000270504	0.002895574	0.105304516	5.193055605	0.20362645	0.007956056	0.164268375	0.134730527	0.164268375	-0.383521487
ENSG00000182359	KBTBD3	0.000272815	0.002914422	0.211773095	3.332119836	0.863610277	0.114836953	0.581697078	0.350726906	0.581697078	-0.77081877
ENSG00000125827	TMX4	0.000274969	0.002929565	0.108859573	4.405099459	0.163697793	0.004995649	0.096201457	0.179053589	0.179053589	-0.396010133
ENSG00000077327	SPAG6	0.000274945	0.002929565	0.142655201	6.327601119	0.374243433	0.001047243	0.315017453	0.118599987	0.315017453	-0.518955343
ENSG00000106012	IQCE	0.000275482	0.002931096	0.092416121	5.55266204	0.115432449	0.007375656	0.082362712	0.125270979	0.125270979	-0.336147685
ENSG00000141298	SSH2	0.000285668	0.003031356	0.146178319	4.640583555	0.423535449	0.02063579	0.311233216	0.161359413	0.311233216	-0.530329355
ENSG00000147642	SYBU	0.000288143	0.003049484	0.107294161	4.470781398	0.170357208	0.005220455	0.134263417	0.173573549	0.173573549	-0.389019958
ENSG00000164032	H2AZ1	0.00029069	0.003070462	0.090097581	7.199671599	0.166772378	0.000847966	0.125226468	0.122974328	0.125226468	-0.326464844
ENSG00000285794		0.000290705	0.003070462	0.12858737	3.931855588	0.237535723	0.025359769	0.165217394	0.231441638	0.231441638	-0.465929279
ENSG00000156313	RPGR	0.000291778	0.003079745	0.092217316	5.665672954	0.130749307	0.008900189	0.093339297	0.123176363	0.123176363	-0.334056562
ENSG00000215440	NPEPL1	0.000293954	0.003095264	0.088814832	6.051072679	0.115711679	0.003170168	0.080790993	0.119339896	0.119339896	-0.321560358
ENSG00000104723	TUSC3	0.000294027	0.003095264	0.111777794	6.539946198	0.231841434	0.00231743	0.191731762	0.118728995	0.191731762	-0.404692248
ENSG00000168778	TCTN2	0.000294838	0.003101756	0.132903912	5.994068046	0.322773412	0.005297389	0.269034504	0.119654508	0.269034504	-0.481084685
ENSG00000088367	EPB41L1	0.000296823	0.003120565	0.103507295	4.99421195	0.193662762	0.008312242	0.158083683	0.142420687	0.158083683	-0.374495322
ENSG00000103316	CRYM	0.000298239	0.00313338	0.16505575	6.296854385	0.499726643	0.002523642	0.42059493	0.118630178	0.42059493	-0.596977767
ENSG00000100124	ANKRD54	0.000299306	0.003138371	0.089201097	5.781050323	0.118030406	0.002024764	0.092214351	0.121553235	0.121553235	-0.322542228
ENSG00000205084	TMEM231	0.000299106	0.003138371	0.128593562	7.547446225	0.303629561	0.001097379	0.25572876	0.127698015	0.25572876	-0.465003749
ENSG00000196177	ACADSB	0.000300195	0.003139434	0.151606885	3.380502455	0.265811121	0.01764731	0.162124811	0.339328359	0.339328359	-0.548078867
ENSG00000232859	LYRM9	0.000300791	0.003143572	0.103816757	5.126774569	0.217094891	0.015008483	0.152383899	0.137037828	0.152383899	-0.375257901
ENSG00000178965	ERICH3	0.000307573	0.003206021	0.123067604	6.381097092	0.277587719	0.005347257	0.229880334	0.118576891	0.229880334	-0.44413089
ENSG00000214114	MYCBP	0.0003084	0.003212537	0.093222127	5.637785565	0.162153835	0.009557816	0.125412662	0.12364365	0.125412662	-0.336358462
ENSG00000148384	INPP5E	0.00031006	0.003225602	0.131498777	5.098213404	0.32850248	0.023257946	0.245303828	0.138105878	0.245303828	-0.47428275
ENSG00000132640	BTBD3	0.00031112	0.003232394	0.120811207	4.011867682	0.210359112	0.005962749	0.164610652	0.220718301	0.220718301	-0.435628421
ENSG00000167074	TEF	0.000314956	0.003265845	0.094846989	5.542463718	0.181671834	0.005891339	0.133825216	0.125487427	0.133825216	-0.341703133
ENSG00000124593		0.000318471	0.003293697	0.127803504	4.400455719	0.236893993	0.074224798	0.108471349	0.179455238	0.179455238	-0.460066132
ENSG00000029993	HMGB3	0.000319895	0.003304127	0.132414336	5.213880535	0.347883133	0.01244356	0.259870952	0.134051404	0.259870952	-0.47651051
ENSG00000114120	SLC25A36	0.000320823	0.00330941	0.122677162	3.969013339	0.203952967	0.007385597	0.144036918	0.226351805	0.226351805	-0.441377577
ENSG00000135525	MAP7	0.00032116	0.00331074	0.088770719	6.062317985	0.108855068	0.003102586	0.084036403	0.11928581	0.11928581	-0.319362038
ENSG00000101190	TCFL5	0.000323158	0.003329177	0.108931719	4.516344718	0.190766698	0.014266582	0.116095317	0.170026691	0.170026691	-0.391717559
ENSG00000198919	DZIP3	0.000325631	0.00334934	0.124421059	5.869511541	0.281210958	0.003111955	0.237317991	0.120610433	0.237317991	-0.447170197
ENSG00000109654	TRIM2	0.000325747	0.00334934	0.090098965	7.121784666	0.138667454	0.003917911	0.11351103	0.122160397	0.122160397	-0.323807933
ENSG00000108100	CCNY	0.000327519	0.003359663	0.108368447	4.452699854	0.131245119	0.007349761	0.079197108	0.175042526	0.175042526	-0.389313798
ENSG00000010278	CD9	0.000327808	0.003359663	0.097254032	8.357250046	0.180758397	0.000429321	0.132261598	0.146468719	0.146468719	-0.349362886
ENSG00000129473	BCL2L2	0.000329523	0.003375059	0.097781296	5.034623261	0.104115363	0.007834914	0.069225432	0.140660262	0.140660262	-0.351124047
ENSG00000149136	SSRP1	0.000331723	0.003395406	0.089883743	5.709959321	0.089272008	0.002980376	0.063599484	0.122496318	0.122496318	-0.322608719
ENSG00000100116	GCAT	0.000333428	0.00340847	0.132271841	3.760827473	0.303533836	0.013197191	0.241575055	0.258531544	0.258531544	-0.474570284
ENSG00000119929	CUTC	0.00033726	0.003441009	0.115294602	4.225206577	0.141536051	0.010381216	0.086745706	0.196070607	0.196070607	-0.413314886
ENSG00000118418	HMGN3	0.000339066	0.003450572	0.112575669	7.312990055	0.235763078	0.000923881	0.195905461	0.124315056	0.195905461	-0.403410989
ENSG00000221821	C6orf226	0.000340078	0.003458652	0.108219348	5.052053847	0.213503636	0.008797282	0.173093459	0.139934737	0.173093459	-0.387716088
ENSG00000254681	PKD1P5	0.000340299	0.003458692	0.436386986	2.316460917	3.553359525	0.168006842	2.789626625	0.641418939	2.789626625	-1.563363912
ENSG00000110583	NAA40	0.000340695	0.003460272	0.133467109	3.748503342	0.244246867	0.015912094	0.177272335	0.260749756	0.260749756	-0.478107665
ENSG00000177169	ULK1	0.000342458	0.003469544	0.117116287	4.207448936	0.268472996	0.009498613	0.203528736	0.197924202	0.203528736	-0.419377657
ENSG00000069812	HES2	0.000344795	0.00348877	0.160817432	3.24764696	0.340231637	0.030889806	0.238672456	0.370777991	0.370777991	-0.575579817
ENSG00000112208	BAG2	0.000345806	0.003494555	0.137498229	4.710354442	0.34200902	0.033657913	0.259968403	0.157044337	0.259968403	-0.492013045
ENSG00000131067	GGT7	0.000346641	0.003500763	0.128599127	5.107159607	0.303862949	0.006056594	0.250791773	0.137766285	0.250791773	-0.460088152
ENSG00000074416	MGLL	0.000347174	0.003501697	0.127954623	6.002986187	0.307379236	0.002502223	0.251778089	0.119600638	0.251778089	-0.457730903
ENSG00000047578	KATNIP	0.000351677	0.003542626	0.116733832	4.189662119	0.192545112	0.011823683	0.140885924	0.199814612	0.199814612	-0.417197292
ENSG00000153930	ANKFN1	0.000352122	0.00354486	0.183167188	4.005827922	0.603952831	0.02160777	0.4994623	0.221497334	0.4994623	-0.654564154
ENSG00000176273	SLC35G1	0.0003579	0.003593926	0.156616542	3.456413516	0.501310523	0.054877407	0.326079655	0.321675463	0.326079655	-0.559015541
ENSG00000235098	ANKRD65	0.000366581	0.003671818	0.120709182	6.469995339	0.274957701	0.003114087	0.223184262	0.118621268	0.223184262	-0.43009195
ENSG00000107581	EIF3A	0.000368609	0.003689804	0.088069185	6.754070458	0.140240238	0.001001392	0.117279935	0.119460235	0.119460235	-0.313666749
ENSG00000065154	OAT	0.000369496	0.003691941	0.097592824	5.837233474	0.185094288	0.001510837	0.146412449	0.120926747	0.146412449	-0.347524524
ENSG00000179304	FAM156B	0.0003693	0.003691941	0.260077889	1.74224139	1.289407789	0.286991953	0.710935564	0.763536049	0.763536049	-0.926164157
ENSG00000152782	PANK1	0.000374077	0.003732782	0.220532557	3.174019891	0.931181297	0.177251563	0.57809489	0.389423138	0.57809489	-0.784594822
ENSG00000067113	PLPP1	0.000374684	0.003736498	0.10277868	4.719335051	0.167982484	0.007547546	0.125881758	0.156514014	0.156514014	-0.365614748
ENSG00000256229	ZNF486	0.00037949	0.003774617	0.173950698	3.256929883	0.367869209	0.101427493	0.169101513	0.368524095	0.368524095	-0.618212211
ENSG00000142949	PTPRF	0.000379694	0.003774617	0.107704118	7.158709232	0.212866291	0.000933268	0.179229642	0.122535457	0.179229642	-0.382759943
ENSG00000135469	COQ10A	0.000381609	0.003791285	0.105909304	4.663985081	0.152331232	0.014336256	0.105867254	0.159872106	0.159872106	-0.376241344
ENSG00000205670	SMIM11	0.00038214	0.003794191	0.100935264	4.993354665	0.19398351	0.011370922	0.146858271	0.14245926	0.146858271	-0.358534193
ENSG00000160991	ORAI2	0.0003841	0.003807153	0.093513614	6.705450799	0.163256019	0.005706718	0.130109132	0.119240759	0.130109132	-0.33204572
ENSG00000140284	SLC27A2	0.000390441	0.003857329	0.121622922	7.211794918	0.270790843	0.001449497	0.228287869	0.123108844	0.228287869	-0.431331114
ENSG00000103657	HERC1	0.000392249	0.003870381	0.172621112	3.159626219	0.529625918	0.069573716	0.382364995	0.393221212	0.393221212	-0.611984098
ENSG00000176244	ACBD7	0.000393499	0.003877907	0.139455827	3.762259442	0.311558918	0.043770694	0.212254596	0.258276008	0.258276008	-0.494288022
ENSG00000133069	TMCC2	0.000397407	0.003910356	0.163160603	4.63435453	0.489531548	0.026608471	0.386849501	0.161762471	0.386849501	-0.57788217
ENSG00000102409	BEX4	0.00039753	0.003910356	0.093249937	5.381943687	0.13901372	0.005809631	0.109430498	0.129241387	0.129241387	-0.330265002
ENSG00000170017	ALCAM	0.000399456	0.003924441	0.089357213	7.254042324	0.114341184	0.000416702	0.090937022	0.123594237	0.123594237	-0.316364141
ENSG00000133256	PDE6B	0.000399323	0.003924441	0.125971277	3.999713812	0.276128289	0.024167626	0.209872727	0.222290892	0.222290892	-0.446005204
ENSG00000140463	BBS4	0.000401719	0.003941805	0.115119972	4.235354991	0.150699474	0.010800728	0.100828475	0.195026167	0.195026167	-0.407404052
ENSG00000171467	ZNF318	0.000404325	0.003962489	0.124565459	4.089032352	0.148403034	0.029810083	0.067783818	0.211178262	0.211178262	-0.440618462
ENSG00000133872	SARAF	0.000413737	0.004034821	0.088264044	6.93449117	0.081021917	0.000442289	0.048386072	0.120552987	0.120552987	-0.31167473
ENSG00000186409	CCDC30	0.000414733	0.004042058	0.143879516	5.741001154	0.38075676	0.019065602	0.302447524	0.122062833	0.302447524	-0.507970479
ENSG00000032742	IFT88	0.000416524	0.004057024	0.119428751	5.593596522	0.260070407	0.008435898	0.213086963	0.12444937	0.213086963	-0.421510262
ENSG00000198729	PPP1R14C	0.000417614	0.004065156	0.141680665	6.079862452	0.366876025	0.003604454	0.308156658	0.119206349	0.308156658	-0.499947827
ENSG00000155026	RSPH10B	0.000419655	0.00407255	0.146383235	4.474737729	0.399694955	0.013641648	0.319158456	0.173256901	0.319158456	-0.516352884
ENSG00000159348	CYB5R1	0.000421407	0.004084469	0.087990253	6.176185461	0.10657805	0.001379014	0.079131212	0.118866782	0.118866782	-0.31028015
ENSG00000139719	VPS33A	0.00042209	0.004086201	0.099925498	5.170829358	0.179688728	0.015353942	0.139725208	0.1354788	0.139725208	-0.352324579
ENSG00000152936	LMNTD1	0.000422351	0.004086239	0.178545615	3.105630415	0.518247092	0.087222198	0.340711808	0.407884895	0.407884895	-0.629499859
ENSG00000114841	DNAH1	0.000422893	0.004088995	0.137504931	5.727096508	0.342810677	0.005671621	0.287983323	0.122252735	0.287983323	-0.484755645
ENSG00000173726	TOMM20	0.000423774	0.004095022	0.109877892	4.357987618	0.132984004	0.004292105	0.084760056	0.183216588	0.183216588	-0.38729956
ENSG00000156172	CFAP418	0.000427398	0.004125029	0.160987473	3.396564469	0.306448612	0.066955249	0.158886648	0.335562409	0.335562409	-0.567088239
ENSG00000154328	NEIL2	0.00042914	0.004136819	0.097527656	5.078029087	0.124533677	0.008836294	0.086806814	0.138889502	0.138889502	-0.343441972
ENSG00000141295	SCRN2	0.000432828	0.004165566	0.09432678	5.24886012	0.119612611	0.005232133	0.089191384	0.132956013	0.132956013	-0.331956111
ENSG00000146085	MMUT	0.00043341	0.004166526	0.092217911	5.480430872	0.129897906	0.005214515	0.100700335	0.126863741	0.126863741	-0.32450164
ENSG00000145425	RPS3A	0.000433533	0.004166526	0.114759127	8.632444621	0.258183359	0.000245114	0.204293469	0.155768121	0.204293469	-0.403812367
ENSG00000001630	CYP51A1	0.000438797	0.004199344	0.094728412	5.178798618	0.14961054	0.004159774	0.106179238	0.135207654	0.135207654	-0.333025197
ENSG00000223757	VWA7	0.000445474	0.00424536	0.184085356	2.821671087	0.421801227	0.033087744	0.294221492	0.493219387	0.493219387	-0.646427934
ENSG00000238203	VWA7	0.000445474	0.00424536	0.184085356	2.821671087	0.421801227	0.033087744	0.294221492	0.493219387	0.493219387	-0.646427934
ENSG00000234433	VWA7	0.000445474	0.00424536	0.184085356	2.821671087	0.421801227	0.033087744	0.294221492	0.493219387	0.493219387	-0.646427934
ENSG00000230048	VWA7	0.000445474	0.00424536	0.184085356	2.821671087	0.421801227	0.033087744	0.294221492	0.493219387	0.493219387	-0.646427934
ENSG00000228607	CLDN25	0.000445204	0.00424536	0.32155109	1.374363206	2.065854202	0.162646044	1.443188299	0.810314064	1.443188299	-1.129199912
ENSG00000158623	COPG2	0.000451893	0.004296228	0.093571958	5.415098347	0.160352283	0.005853421	0.130131955	0.128410877	0.130131955	-0.328228161
ENSG00000105819	PMPCB	0.000451852	0.004296228	0.088522922	6.152448426	0.057390833	0.002769649	0.025802328	0.118936423	0.118936423	-0.31051949
ENSG00000168314	MOBP	0.000455837	0.004325961	0.256351917	2.951792131	1.260659064	0.064099121	0.956543988	0.452763025	0.956543988	-0.898628698
ENSG00000110321	EIF4G2	0.000455653	0.004325961	0.087839203	6.341055852	0.102688164	0.001242648	0.078602762	0.118590659	0.118590659	-0.307925353
ENSG00000156508	EEF1A1	0.000466714	0.004408128	0.149906194	11.08439109	0.175176067	2.07E-05	0.098510534	0.348990984	0.348990984	-0.524546852
ENSG00000229453	SPINK8	0.00046668	0.004408128	0.287360675	2.431980185	1.504780157	0.160957046	1.121537248	0.611140773	1.121537248	-1.005528534
ENSG00000170632	ARMC10	0.000470079	0.004434643	0.137683348	4.761132049	0.361980911	0.064279643	0.230137846	0.154114889	0.230137846	-0.48151326
ENSG00000223658	C1GALT1C1L	0.000473646	0.004463	0.235132207	2.637521499	1.016467894	0.127486077	0.73118139	0.551303681	0.73118139	-0.821842088
ENSG00000141542	RAB40B	0.000474287	0.004466387	0.144772944	3.564425013	0.2723481	0.027978883	0.161842634	0.297539548	0.297539548	-0.505963112
ENSG00000119616	FCF1	0.000474834	0.004468894	0.129633474	3.810848981	0.222811086	0.011112786	0.167405385	0.24988396	0.24988396	-0.453012674
ENSG00000162817	C1orf115	0.000482431	0.004537707	0.131353329	4.225822545	0.327892617	0.023960452	0.244007549	0.196006907	0.244007549	-0.45846598
ENSG00000167523	SPATA33	0.000483905	0.004548879	0.140102041	5.740638107	0.350429061	0.009981142	0.294871312	0.122067705	0.294871312	-0.488887622
ENSG00000174950	CD164L2	0.000484236	0.0045493	0.173140271	6.065242487	0.537266063	0.003826013	0.461756817	0.119272152	0.461756817	-0.604143254
ENSG00000109189	USP46	0.0004852	0.004555668	0.136877614	3.664618919	0.169452156	0.014270359	0.100529617	0.276711303	0.276711303	-0.477538138
ENSG00000120071	KANSL1	0.000494733	0.004628767	0.13240369	4.456411787	0.313888781	0.05810617	0.214164554	0.17473801	0.214164554	-0.461240438
ENSG00000143486	EIF2D	0.000497894	0.004655603	0.104683956	4.612777825	0.139234576	0.007017848	0.098529983	0.163182726	0.163182726	-0.364497685
ENSG00000107537	PHYH	0.00050103	0.004679421	0.103449801	4.998141574	0.191104969	0.006533352	0.159677772	0.142244542	0.159677772	-0.360026522
ENSG00000101843	PSMD10	0.000506321	0.004714983	0.091680633	5.443794785	0.074540297	0.002826107	0.044805333	0.12771761	0.12771761	-0.318809311
ENSG00000095002	MSH2	0.000509238	0.004739368	0.099381463	4.976171361	0.122483127	0.010152614	0.076678552	0.143242506	0.143242506	-0.345435033
ENSG00000178363	CALML3	0.000511679	0.004759299	0.396076231	3.697289998	3.033392541	0.054086626	2.382368012	0.270321258	2.382368012	-1.376193402
ENSG00000138463	SLC49A4	0.000514948	0.004773289	0.093973835	5.377041024	0.16833369	0.007788895	0.129239106	0.12936706	0.12936706	-0.326357756
ENSG00000117602	RCAN3	0.000518244	0.004797911	0.094298668	5.338824134	0.117431663	0.007731997	0.086241404	0.130373793	0.130373793	-0.327324332
ENSG00000047597	XK	0.000519441	0.004803395	0.148020057	3.597435026	0.398086965	0.049797233	0.283902604	0.290487061	0.290487061	-0.513707376
ENSG00000144647	POMGNT2	0.000521512	0.004816941	0.103339462	5.489662727	0.190058296	0.006086861	0.159769894	0.126653667	0.159769894	-0.358531796
ENSG00000100271	TTLL1	0.000525886	0.004848887	0.118462483	4.900436214	0.249847721	0.011069317	0.206883471	0.146831175	0.206883471	-0.410734608
ENSG00000135766	EGLN1	0.00053125	0.004892673	0.108838044	4.451469847	0.230330011	0.008832674	0.150459885	0.175143771	0.175143771	-0.377067636
ENSG00000259948		0.000534708	0.004918823	0.225255028	4.617535277	0.941551557	0.071523691	0.716519019	0.16286631	0.716519019	-0.779999183
ENSG00000143248	RGS5	0.000535076	0.004919359	0.212531945	2.459687738	0.684656488	0.097881612	0.473143038	0.603653162	0.603653162	-0.735903154
ENSG00000146282	RARS2	0.000543915	0.00498046	0.09076789	5.80714793	0.089985689	0.006707528	0.052406471	0.121249826	0.121249826	-0.313888219
ENSG00000154710	RABGEF1	0.000545117	0.004985718	0.169452776	5.8738578	0.575845543	0.004211013	0.441751288	0.120570151	0.441751288	-0.585890963
ENSG00000135315	CEP162	0.000552998	0.005049082	0.095113912	5.530966293	0.134705027	0.014767616	0.090905679	0.12573644	0.12573644	-0.328492803
ENSG00000171428	NAT1	0.000569388	0.005183809	0.089671169	6.006188626	0.123634448	0.005302165	0.095648794	0.119581728	0.119581728	-0.308988205
ENSG00000198431	TXNRD1	0.00056971	0.005183809	0.101559836	5.637667733	0.196451019	0.001132015	0.159061434	0.12364569	0.159061434	-0.349938562
ENSG00000290877	ROCK1P1	0.000571787	0.005193789	0.366084139	2.833171406	2.389593103	0.121603896	1.95982987	0.48959002	1.95982987	-1.261033807
ENSG00000132716	DCAF8	0.000575422	0.00521786	0.096371315	5.0966338	0.100294724	0.006077203	0.065924737	0.138166327	0.138166327	-0.331800878
ENSG00000089123	TASP1	0.000577723	0.005230178	0.131010887	3.804824304	0.178091779	0.015678028	0.117815541	0.250894594	0.250894594	-0.450921512
ENSG00000124939	SCGB2A1	0.000577767	0.005230178	0.157092927	6.554158872	0.447285173	0.002466238	0.380811887	0.118758742	0.380811887	-0.540689044
ENSG00000197429	IPP	0.000577705	0.005230178	0.127547052	4.44698143	0.293725838	0.054248161	0.198414821	0.175514336	0.198414821	-0.439000568
ENSG00000158486	DNAH3	0.000578709	0.005235715	0.123141246	5.622382883	0.273541858	0.007314259	0.228194932	0.123915223	0.228194932	-0.423778501
ENSG00000145491	ROPN1L	0.000586617	0.005295212	0.125657864	7.645526023	0.284417663	0.000894508	0.244339171	0.129366394	0.244339171	-0.431977521
ENSG00000106772	PRUNE2	0.000586993	0.005295594	0.187077819	3.971352423	0.632977245	0.027911031	0.515646309	0.226037869	0.515646309	-0.643090183
ENSG00000106714	CNTNAP3	0.000587447	0.005296682	0.15120043	4.062775178	0.431504708	0.043514033	0.311550117	0.214340278	0.311550117	-0.519728062
ENSG00000177459	ERICH5	0.000591804	0.005332947	0.17486985	5.844759288	0.544977434	0.00870262	0.466228518	0.120850249	0.466228518	-0.600737926
ENSG00000183891	TTC32	0.000600827	0.00538677	0.110009147	4.446056503	0.155234111	0.012366036	0.108924825	0.175590905	0.175590905	-0.377467885
ENSG00000196476	C20orf96	0.000600824	0.00538677	0.158728626	6.479543636	0.44740816	0.003006265	0.388295028	0.118632188	0.388295028	-0.544636331
ENSG00000092036	HAUS4	0.000601623	0.005388367	0.107791765	5.109915181	0.221946131	0.009409641	0.171046613	0.137662622	0.171046613	-0.369820766
ENSG00000110777	POU2AF1	0.000601952	0.005388367	0.176206234	4.557632958	0.583487464	0.011912637	0.470305242	0.166992136	0.470305242	-0.604516606
ENSG00000080298	RFX3	0.000611336	0.005462507	0.131205543	3.776779309	0.17817811	0.011654213	0.119747903	0.255711147	0.255711147	-0.449580319
ENSG00000285203	LTB4R2	0.000619444	0.005522532	0.184777706	3.455022028	0.637452606	0.041509718	0.488763767	0.321995064	0.488763767	-0.632485755
ENSG00000213906	LTB4R2	0.000619444	0.005522532	0.184777706	3.455022028	0.637452606	0.041509718	0.488763767	0.321995064	0.488763767	-0.632485755
ENSG00000142156	COL6A1	0.000626588	0.005573727	0.244056222	3.979907732	1.178959406	0.040783164	0.884299492	0.22489605	0.884299492	-0.834632307
ENSG00000180979	LRRC57	0.000628626	0.005583323	0.11469101	4.310663687	0.186096829	0.016694174	0.123623651	0.187601667	0.187601667	-0.39212318
ENSG00000096872	IFT74	0.000629927	0.005590262	0.110371657	4.379081989	0.179943325	0.007869486	0.142552049	0.181328231	0.181328231	-0.377293425
ENSG00000116539	ASH1L	0.000630206	0.005590262	0.092755032	6.428437595	0.141346727	0.015033662	0.099562444	0.11858765	0.11858765	-0.317061738
ENSG00000081803	CADPS2	0.00063095	0.005593742	0.100089382	5.270620162	0.185556442	0.013052272	0.142535975	0.132301724	0.142535975	-0.342100379
ENSG00000290357		0.000634414	0.005621319	0.12775581	6.278079036	0.294278598	0.004510398	0.248980337	0.118654685	0.248980337	-0.436472379
ENSG00000165312	OTUD1	0.000642264	0.005678217	0.129100686	6.10830607	0.321845744	0.002832785	0.256022996	0.119089716	0.256022996	-0.440634612
ENSG00000165118	C9orf64	0.00065099	0.005752158	0.10596906	4.691864519	0.113834561	0.016251422	0.067357815	0.15815358	0.15815358	-0.361294009
ENSG00000150756	ATPSCKMT	0.0006521	0.005758767	0.158997383	3.338515228	0.271487652	0.043410082	0.150099071	0.349217423	0.349217423	-0.542016413
ENSG00000116133	DHCR24	0.000655892	0.005782579	0.091545225	7.666741771	0.119342495	0.000410795	0.09570534	0.129747592	0.129747592	-0.311929588
ENSG00000016402	IL20RA	0.000656933	0.005782579	0.147611635	5.238079176	0.38863441	0.01645931	0.321949726	0.133287752	0.321949726	-0.502905392
ENSG00000183853	KIRREL1	0.00065657	0.005782579	0.342020893	2.010482379	2.133483682	0.1680336	1.648761892	0.713103941	1.648761892	-1.165299457
ENSG00000282514		0.000657493	0.005783904	0.263748097	2.353570378	1.272137869	0.14815577	0.932231457	0.631860739	0.932231457	-0.898515046
ENSG00000275932	DUSP14	0.000658276	0.005787587	0.152970934	5.961887151	0.413501238	0.102333568	0.261094618	0.119864139	0.261094618	-0.521078952
ENSG00000185432	METTL7A	0.000662762	0.005823802	0.131834138	7.100161656	0.312291131	0.001231781	0.268701565	0.121949748	0.268701565	-0.448834292
ENSG00000103034	NDRG4	0.000664728	0.005834629	0.235050084	2.277212737	0.992045087	0.089947896	0.768119879	0.65134309	0.768119879	-0.800046684
ENSG00000186260	MRTFB	0.000666647	0.005845016	0.120479486	4.717202041	0.282121361	0.01735208	0.208085848	0.156639482	0.208085848	-0.40998459
ENSG00000168916	ZNF608	0.000671757	0.005883336	0.150841725	4.496126332	0.41429568	0.03168137	0.321700079	0.171573949	0.321700079	-0.512990659
ENSG00000223519	KIF28P	0.000673313	0.005893714	0.254020573	1.574313566	1.145198251	0.142717675	0.859445758	0.788279246	0.859445758	-0.863726186
ENSG00000117335	CD46	0.000681488	0.005955437	0.091104009	7.400641703	0.120968225	0.003424704	0.091364342	0.125482072	0.125482072	-0.309473048
ENSG00000187601	MAGEH1	0.00068385	0.00596951	0.124109992	4.81158246	0.283380411	0.013889302	0.225339942	0.151359586	0.225339942	-0.421474241
ENSG00000140479	PCSK6	0.000685327	0.005975842	0.155995102	3.828111857	0.434041472	0.054845121	0.323094736	0.247036113	0.323094736	-0.529663082
ENSG00000004975	DVL2	0.00068781	0.005990918	0.11332994	4.294054703	0.104563438	0.010284825	0.060683676	0.189190917	0.189190917	-0.384686325
ENSG00000148019	CEP78	0.000694472	0.006045637	0.114907174	4.347436036	0.160360031	0.02089037	0.106303677	0.184176292	0.184176292	-0.389736652
ENSG00000132383	RPA1	0.000698696	0.006076021	0.111966154	4.352605816	0.147345333	0.010998928	0.101500449	0.183704809	0.183704809	-0.379575392
ENSG00000115425	PECR	0.000699858	0.006082528	0.137578545	3.676282898	0.205356317	0.019563873	0.129824875	0.274405573	0.274405573	-0.466341019
ENSG00000186462	NAP1L2	0.00070149	0.006090056	0.277363867	1.551900656	1.50175413	0.203965675	0.990848969	0.791158252	0.990848969	-0.939985023
ENSG00000129480	DTD2	0.000711112	0.006160125	0.120332943	4.113701383	0.145675481	0.016606065	0.080315667	0.208283781	0.208283781	-0.407358164
ENSG00000188010	MORN2	0.000712597	0.006166269	0.126734066	7.091339142	0.287997417	0.001203864	0.248248432	0.121865698	0.248248432	-0.428955046
ENSG00000136811	ODF2	0.000712986	0.00616628	0.089133167	5.920961648	0.119110461	0.003222741	0.097546705	0.120167113	0.120167113	-0.301674445
ENSG00000151148	UBE3B	0.000717061	0.006194786	0.099680855	4.982927469	0.128377648	0.011388106	0.086846997	0.142932627	0.142932627	-0.337217469
ENSG00000174156	GSTA3	0.000718515	0.006202394	0.204893165	4.962822785	0.7621387	0.014990261	0.637021926	0.143859381	0.637021926	-0.693033749
ENSG00000107758	PPP3CB	0.000723058	0.006233041	0.090437812	5.758670529	0.059191998	0.005197138	0.032139367	0.121831271	0.121831271	-0.305741615
ENSG00000146063	TRIM41	0.000728864	0.006272889	0.089531533	6.063594531	0.072125121	0.005215432	0.041249498	0.119279828	0.119279828	-0.302480939
ENSG00000118307	DNAI7	0.000729663	0.006276364	0.137582987	5.854387896	0.337022453	0.005315235	0.288673194	0.120754833	0.288673194	-0.464780621
ENSG00000084070	SMAP2	0.000730531	0.006280435	0.165584911	7.008159172	0.505128439	0.001318381	0.424517534	0.12112696	0.424517534	-0.559322113
ENSG00000242259	C22orf39	0.000733235	0.006296868	0.089934341	6.374023459	0.115589228	0.007040204	0.084812842	0.1185778	0.1185778	-0.303693948
ENSG00000149328	GLB1L2	0.000734396	0.006303432	0.141185112	6.354944044	0.360800179	0.002702712	0.306881335	0.118583511	0.306881335	-0.476698196
ENSG00000182103	FAM181B	0.000737471	0.006322998	0.173007978	3.648502836	0.556093799	0.07753597	0.387335648	0.279940409	0.387335648	-0.583946189
ENSG00000159346	ADIPOR1	0.000744716	0.006378234	0.087772297	6.572208767	0.131104273	0.000850472	0.100198371	0.118800354	0.118800354	-0.296017754
ENSG00000172893	DHCR7	0.000746543	0.006390441	0.103148589	5.463752913	0.216674332	0.007504728	0.1577399	0.127248333	0.1577399	-0.347805675
ENSG00000275131	PDE4DIPP2	0.000748139	0.006400655	0.348170531	1.297283028	2.164792621	0.19641314	1.686302753	0.816574024	1.686302753	-1.173787876
ENSG00000111834	RSPH4A	0.000753826	0.006445841	0.138648687	6.888939021	0.339434695	0.001649218	0.296911242	0.120235393	0.296911242	-0.467137237
ENSG00000233170		0.000756022	0.006457674	0.2596264	1.4673357	1.229829667	0.21929431	0.827589474	0.801097701	0.827589474	-0.874528959
ENSG00000164109	MAD2L1	0.000758572	0.006472497	0.153392942	3.427941541	0.337753834	0.037187583	0.245594365	0.328248581	0.328248581	-0.516548398
ENSG00000166483	WEE1	0.000765293	0.006519347	0.118159519	5.804385207	0.259405754	0.008923112	0.207916289	0.12128091	0.207916289	-0.397612887
ENSG00000157470	FAM81A	0.000773388	0.006579158	0.164320538	3.187956769	0.47930637	0.028662516	0.390695036	0.385792007	0.390695036	-0.552469875
ENSG00000140526	ABHD2	0.000773444	0.006579158	0.112303765	4.271573743	0.175234933	0.00449478	0.133600551	0.191384908	0.191384908	-0.377579585
ENSG00000151151	IPMK	0.000773556	0.006579158	0.119068861	5.544437996	0.275574018	0.004738301	0.215451485	0.125445151	0.215451485	-0.40031993
ENSG00000141401	IMPA2	0.000789464	0.006696541	0.097767793	5.862548833	0.202429677	0.003598376	0.144855792	0.120676091	0.144855792	-0.328153947
ENSG00000163704	PRRT3	0.000795097	0.006740725	0.12931079	5.917723872	0.296654374	0.004178194	0.255520817	0.120192906	0.255520817	-0.433772537
ENSG00000105948	TTC26	0.000801606	0.006788668	0.125105324	5.054438516	0.279618404	0.007795869	0.235285882	0.139837006	0.235285882	-0.419383023
ENSG00000071462	BUD23	0.000803129	0.006794324	0.089131671	7.056343739	0.123860493	0.001842613	0.103123318	0.121543097	0.121543097	-0.298743888
ENSG00000168283	BMI1	0.000807024	0.006823644	0.132577241	3.721349683	0.181503959	0.007230031	0.129026864	0.26575493	0.26575493	-0.444183399
ENSG00000112984	KIF20A	0.000811206	0.006848075	0.226236677	2.134867678	0.791066566	0.109318877	0.54868807	0.685607295	0.685607295	-0.757653672
ENSG00000055211	GINM1	0.00081334	0.006853969	0.089932104	5.771419656	0.106352567	0.003940929	0.075916335	0.121670824	0.121670824	-0.301111996
ENSG00000123977	DAW1	0.000824692	0.006939814	0.149714835	5.312746315	0.394243334	0.011491576	0.336629601	0.131090018	0.336629601	-0.500702023
ENSG00000142794	NBPF3	0.000830734	0.006972201	0.143157418	3.654055349	0.324613727	0.039471738	0.240952265	0.278822286	0.278822286	-0.478481638
ENSG00000163346	PBXIP1	0.000836372	0.007008415	0.089611444	5.656580659	0.110898509	0.001392279	0.089791926	0.123325314	0.123325314	-0.299344207
ENSG00000288668		0.0008532	0.007130634	0.327810988	3.608879118	1.896896474	0.400189714	1.268777415	0.288083733	1.268777415	-1.093227636
ENSG00000007923	DNAJC11	0.000852758	0.007130634	0.094583235	5.707814013	0.125625017	0.016413013	0.089631888	0.122527564	0.122527564	-0.315442354
ENSG00000086598	TMED2	0.000854766	0.007139969	0.087869216	6.632067164	0.114198384	0.000946097	0.091609951	0.118969113	0.118969113	-0.292993121
ENSG00000165684	SNAPC4	0.000858805	0.007166172	0.090769012	5.719542512	0.139807122	0.005601724	0.113930973	0.122358795	0.122358795	-0.302543257
ENSG00000012660	ELOVL5	0.000861436	0.007184362	0.10132478	5.560046195	0.188127946	0.001877918	0.157574865	0.12511723	0.157574865	-0.337640539
ENSG00000081377	CDC14B	0.000866693	0.007217166	0.144938839	3.500786185	0.194022697	0.014677642	0.118792318	0.311587235	0.311587235	-0.482728525
ENSG00000158234	FAIM	0.000866732	0.007217166	0.106058288	5.123525045	0.197634116	0.010842427	0.163856404	0.137157003	0.163856404	-0.353232911
ENSG00000102543	CDADC1	0.00086814	0.007225106	0.181658212	3.388064288	0.621798997	0.043992197	0.46852783	0.337553829	0.46852783	-0.604940479
ENSG00000167216	KATNAL2	0.000876919	0.007282916	0.18003355	5.804216985	0.577120918	0.018223751	0.485169814	0.12128281	0.485169814	-0.599025651
ENSG00000124440	HIF3A	0.000879258	0.007294725	0.237110441	1.765908111	0.848470971	0.113566359	0.581075593	0.759610315	0.759610315	-0.788761539
ENSG00000214265		0.000879985	0.007294977	0.267530523	1.931258548	1.347966487	0.260989717	0.850607492	0.729314172	0.850607492	-0.88989408
ENSG00000167183	PRR15L	0.000880207	0.007294977	0.116279145	5.9611383	0.239337838	0.003915155	0.206077656	0.119869309	0.206077656	-0.386774342
ENSG00000182224	CYB5D1	0.000887529	0.007344176	0.11738599	4.090430904	0.159189213	0.002997414	0.114113877	0.21101221	0.21101221	-0.390184866
ENSG00000164294	GPX8	0.00089147	0.007372949	0.136581085	3.984282481	0.351337437	0.02502025	0.264702025	0.224316053	0.264702025	-0.453819566
ENSG00000165923	AGBL2	0.000894583	0.007394851	0.164863558	3.934756171	0.493479957	0.016578059	0.40555572	0.231037267	0.40555572	-0.547633704
ENSG00000111911	HINT3	0.000904926	0.007468697	0.09170925	5.540096268	0.121164514	0.005086866	0.08736118	0.12553836	0.12553836	-0.304339886
ENSG00000197603	CPLANE1	0.000923429	0.007593809	0.112085069	5.181592234	0.226075647	0.020205548	0.174911985	0.135113365	0.174911985	-0.371323589
ENSG00000262771	SSBP1	0.000925513	0.007603074	0.189184744	4.408412185	0.636639319	0.25389002	0.301979669	0.178768204	0.301979669	-0.626625763
ENSG00000281123	FCGBP	0.000925471	0.007603074	0.489779823	3.88988062	4.197200977	0.238857549	3.486796703	0.237444842	3.486796703	-1.622275807
ENSG00000204977	TRIM13	0.000927772	0.007605911	0.092012183	5.667657398	0.091581037	0.008345326	0.058953077	0.123144284	0.123144284	-0.304703907
ENSG00000078900	TP73	0.000928527	0.007608181	0.136476994	5.038260371	0.332490522	0.005805723	0.283475114	0.140507234	0.283475114	-0.451920733
ENSG00000136305	CIDEB	0.000929662	0.007613551	0.203596026	4.042190019	0.796710711	0.152499167	0.491283625	0.216879326	0.491283625	-0.674104626
ENSG00000249773		0.000931126	0.007621613	0.35318529	1.461509919	2.22710361	0.48511228	1.452228336	0.801728191	1.452228336	-1.16923783
ENSG00000112425	EPM2A	0.00093253	0.007625258	0.155164275	3.497619835	0.322083651	0.061624851	0.199588816	0.312299924	0.312299924	-0.513613744
ENSG00000112972	HMGCS1	0.000940671	0.007685086	0.120973851	4.012662272	0.232840684	0.006675638	0.18770621	0.220616171	0.220616171	-0.400144629
ENSG00000151729	SLC25A4	0.00094584	0.007706345	0.096749016	6.745340863	0.166467451	0.0033783	0.141998092	0.119418501	0.141998092	-0.319867732
ENSG00000077713	SLC25A43	0.000952656	0.007753926	0.132117834	3.815737365	0.199305861	0.022026064	0.135731452	0.249070278	0.249070278	-0.43653685
ENSG00000168970	JMJD7-PLA2G4B	0.00095652	0.007773433	0.286551038	3.045253873	1.508140109	0.288263947	0.987013682	0.425000053	0.987013682	-0.946481803
ENSG00000058668	ATP2B4	0.00095608	0.007773433	0.090307991	5.690311031	0.113160137	0.003875111	0.084204845	0.122788869	0.122788869	-0.298300117
ENSG00000065320	NTN1	0.000962717	0.00781182	0.112168453	6.050716447	0.222310955	0.002123042	0.193284907	0.119341651	0.193284907	-0.370290658
ENSG00000250644		0.000964428	0.007821712	0.15591895	5.79984662	0.452595927	0.00847005	0.369100898	0.1213325	0.369100898	-0.514642176
ENSG00000102753	KPNA3	0.000966385	0.00783358	0.089298252	5.775792566	0.086771758	0.002230291	0.066196886	0.121617049	0.121617049	-0.294696253
ENSG00000014123	UFL1	0.000974218	0.00788903	0.101253047	4.857328383	0.181551989	0.010246562	0.14759593	0.148980533	0.148980533	-0.333919227
ENSG00000102738	MRPS31	0.000975447	0.007890941	0.13654281	5.987716008	0.333622047	0.004920452	0.284639464	0.119693976	0.284639464	-0.450251889
ENSG00000174326	SLC16A11	0.000975391	0.007890941	0.209173395	4.951693143	0.785758709	0.039997094	0.63954077	0.144378564	0.63954077	-0.689755638
ENSG00000139537	CCDC65	0.000979366	0.00791459	0.12610905	6.792352899	0.279874394	0.003166283	0.243831626	0.119655324	0.243831626	-0.415704386
ENSG00000146648	EGFR	0.000987644	0.007965293	0.128347483	4.689894392	0.314135267	0.003662977	0.252181168	0.158273179	0.252181168	-0.422779558
ENSG00000183458	PKD1P3	0.000987511	0.007965293	0.532507831	2.449959915	5.035698384	0.466861107	3.937194232	0.606295185	3.937194232	-1.754113153
ENSG00000198836	OPA1	0.00099124	0.007990235	0.093332957	5.75473494	0.097009399	0.013409679	0.059625099	0.121881916	0.121881916	-0.307345563
ENSG00000152154	TMEM178A	0.000991787	0.007990595	0.155752155	3.899422101	0.42372694	0.019941066	0.3568225	0.236048905	0.3568225	-0.512867902
ENSG00000010318	PHF7	0.000995668	0.008009684	0.120701481	4.263934967	0.249341428	0.03412766	0.182143692	0.192141815	0.192141815	-0.397318861
ENSG00000114520	SNX4	0.001006406	0.008087883	0.117629282	4.135854305	0.141278103	0.009151781	0.099698156	0.205745866	0.205745866	-0.386850913
ENSG00000166855	CLPX	0.001008453	0.00810024	0.112430753	4.416366114	0.162048326	0.018236075	0.109383468	0.178086846	0.178086846	-0.369690045
ENSG00000161981	SNRNP25	0.001014277	0.008134689	0.104681047	6.226275023	0.201792592	0.003292777	0.166898338	0.118745981	0.166898338	-0.344038047
ENSG00000174599	TRAM1L1	0.001016243	0.008135789	0.224394398	2.376685551	0.651253496	0.156207957	0.362780145	0.625824526	0.625824526	-0.737357974
ENSG00000110422	HIPK3	0.001022653	0.008177106	0.089200585	5.976072284	0.144488637	0.003807841	0.112636993	0.11976874	0.11976874	-0.292954295
ENSG00000179456	ZBTB18	0.001031033	0.00822756	0.090137654	5.73566399	0.0838621	0.004051694	0.051019403	0.122134916	0.122134916	-0.295824461
ENSG00000077097	TOP2B	0.001031848	0.008229929	0.089092554	6.956948414	0.066281186	0.002557406	0.030189305	0.120720029	0.120720029	-0.292374686
ENSG00000267001		0.001035905	0.008254007	0.292618518	1.709271328	1.506750517	0.300596461	1.02925882	0.768827562	1.02925882	-0.959961164
ENSG00000291140	AMZ2P1	0.00103648	0.008254454	0.104793252	4.738807505	0.186409989	0.015173706	0.113869956	0.155382451	0.155382451	-0.343767198
ENSG00000145391	SETD7	0.001066815	0.008480443	0.109392907	4.466162648	0.154586838	0.011911712	0.103710393	0.173945364	0.173945364	-0.3579649
ENSG00000265158	LRRC37A7P	0.001067593	0.00848099	0.247410181	1.459276468	1.011941396	0.148715349	0.730717336	0.801968037	0.801968037	-0.809545939
ENSG00000290888		0.001074013	0.008516158	0.151109392	4.428958616	0.414004622	0.019317892	0.335318815	0.177019179	0.335318815	-0.494185863
ENSG00000061676	NCKAP1	0.00107489	0.008517672	0.111005432	4.337411209	0.202134138	0.006279202	0.167685461	0.185097573	0.185097573	-0.363004846
ENSG00000080200	CRYBG3	0.001080305	0.008543545	0.272180507	2.031498995	1.318311943	0.204835283	0.945739379	0.708629267	0.945739379	-0.889685193
ENSG00000114770	ABCC5	0.001085753	0.008582361	0.109522273	5.24260735	0.215622297	0.009595681	0.176701235	0.133147792	0.176701235	-0.357843054
ENSG00000188112	C6orf132	0.001087531	0.008592144	0.093462334	7.762089468	0.141301521	0.00411503	0.117217414	0.131551906	0.131551906	-0.305326983
ENSG00000102904	TSNAXIP1	0.001089442	0.008597349	0.119134606	5.881313901	0.24944474	0.00546895	0.214964061	0.120502291	0.214964061	-0.389135089
ENSG00000128596	CCDC136	0.001108112	0.008715755	0.199024026	2.681145358	0.620893639	0.077511588	0.458850119	0.537681975	0.537681975	-0.649123622
ENSG00000073464	CLCN4	0.001119381	0.008787	0.16637646	3.191771878	0.363912497	0.045110812	0.240512742	0.384806099	0.384806099	-0.542165019
ENSG00000090054	SPTLC1	0.001139019	0.00892793	0.089996368	6.299484533	0.089809357	0.007164227	0.055068972	0.118627112	0.118627112	-0.292823572
ENSG00000161544	CYGB	0.001146031	0.008943509	0.280470643	2.704238462	1.523982974	0.068879292	1.152851697	0.530409378	1.152851697	-0.912085573
ENSG00000103740	ACSBG1	0.001144116	0.008943509	0.156264599	3.362315265	0.377298898	0.035641057	0.289936782	0.343605787	0.343605787	-0.50824399
ENSG00000106686	SPATA6L	0.001151202	0.008971269	0.115010733	4.593190284	0.235480429	0.019609974	0.185826481	0.164505477	0.185826481	-0.373865692
ENSG00000182670	TTC3	0.001163871	0.009051322	0.092164041	5.661776195	0.137500143	0.008684192	0.110903895	0.123239802	0.123239802	-0.299310952
ENSG00000130024	PHF10	0.001166464	0.009062614	0.09101069	5.621606338	0.082194567	0.004713654	0.057389799	0.123929175	0.123929175	-0.295507715
ENSG00000168159	RNF187	0.001167073	0.009062916	0.108161946	6.197246733	0.205034859	0.009152016	0.172545819	0.118811865	0.172545819	-0.351181021
ENSG00000177576	C18orf32	0.00117261	0.009092588	0.110404193	5.472439653	0.2122732	0.039062999	0.150246282	0.127047186	0.150246282	-0.358312407
ENSG00000157578	LCA5L	0.001172235	0.009092588	0.117192068	4.285622181	0.242033058	0.01734442	0.195958698	0.190008043	0.195958698	-0.380352855
ENSG00000104427	ZC2HC1A	0.001172504	0.009092588	0.13690259	3.833159577	0.340957926	0.016420695	0.274667169	0.246216963	0.274667169	-0.444315412
ENSG00000176381	PRR18	0.001174657	0.009104018	0.217942487	4.752066763	0.830145698	0.017735734	0.719972403	0.154625867	0.719972403	-0.707215425
ENSG00000110721	CHKA	0.001176878	0.00910791	0.101347689	4.743335781	0.156270372	0.004402077	0.125511253	0.155122818	0.155122818	-0.328815035
ENSG00000242193	CRYZL2P	0.001176789	0.00910791	0.131324332	3.862201073	0.3175594	0.024375311	0.243474394	0.241625321	0.243474394	-0.426074832
ENSG00000109689	STIM2	0.001191188	0.009194081	0.089592523	6.299244946	0.118082876	0.006037545	0.093976158	0.118627388	0.118627388	-0.290367738
ENSG00000144357	UBR3	0.001192355	0.009196352	0.100292	4.981502509	0.142721586	0.013220963	0.097332918	0.142997857	0.142997857	-0.325016538
ENSG00000109193	SULT1E1	0.001194861	0.009211207	0.309668971	3.220813326	1.911173079	0.087179832	1.402168044	0.377417478	1.402168044	-1.003359684
ENSG00000121064	SCPEP1	0.00120277	0.009258706	0.104864872	6.385173245	0.226262051	0.001749075	0.169040294	0.118576664	0.169040294	-0.339575785
ENSG00000250299	MRPS31P4	0.001217678	0.009350626	0.343677071	1.431078959	2.054311976	0.247466565	1.586966566	0.804906848	1.586966566	-1.111694489
ENSG00000152467	ZSCAN1	0.00121824	0.009350626	0.32415751	3.227495053	1.847365695	0.083533168	1.548439738	0.375747133	1.548439738	-1.048511702
ENSG00000085063	CD59	0.001219683	0.009357185	0.100972383	8.691226363	0.1015658	0.000368524	0.073565729	0.157977069	0.157977069	-0.326568585
ENSG00000101474	APMAP	0.001222051	0.009370829	0.10216007	6.444601496	0.213964125	0.002021984	0.160070596	0.118598038	0.160070596	-0.330353254
ENSG00000254772	EEF1G	0.001240034	0.009487038	0.100404266	8.649724569	0.150151663	0.000159748	0.12157968	0.156409009	0.156409009	-0.324256387
ENSG00000122545	SEPTIN7	0.00123936	0.009487038	0.113648518	5.057456921	0.233940985	0.011959105	0.188639691	0.139713823	0.188639691	-0.367046468
ENSG00000197077	KIAA1671	0.001249437	0.009543992	0.094798928	6.446367734	0.160174805	0.002758628	0.136816366	0.118599381	0.136816366	-0.30594907
ENSG00000165868	HSPA12A	0.001252917	0.009561385	0.114839312	5.543896305	0.237594648	0.036936285	0.167888228	0.125456733	0.167888228	-0.370534955
ENSG00000119912	IDE	0.001259501	0.009607016	0.089311905	6.031838084	0.069330006	0.004446878	0.045373058	0.119438335	0.119438335	-0.288035481
ENSG00000237765	FAM200B	0.001298991	0.009870348	0.098656124	5.033663694	0.188551305	0.010463389	0.12802188	0.140700781	0.140700781	-0.317298069
ENSG00000170248	PDCD6IP	0.001302002	0.009881843	0.097447002	5.053142837	0.164741748	0.007591504	0.139324953	0.139890062	0.139890062	-0.31334455
ENSG00000203705	TATDN3	0.001304823	0.009886302	0.130580846	3.863356349	0.157882785	0.023378473	0.095963825	0.241446983	0.241446983	-0.419806575
ENSG00000125962	ARMCX5	0.001303727	0.009886302	0.105568606	4.655907959	0.179253087	0.012708628	0.144452794	0.16038072	0.16038072	-0.339419765
ENSG00000135063	ENTREP1	0.00131444	0.009954426	0.172894278	4.176769934	0.529546785	0.034571029	0.429689764	0.201206308	0.429689764	-0.555476161
ENSG00000165646	SLC18A2	0.001319827	0.009990459	0.353637234	2.290634443	2.277692006	0.289825328	1.652476599	0.647971244	1.652476599	-1.135753167
ENSG00000267041	ZNF850	0.001322928	0.010009168	0.296476659	3.43644104	1.574414234	0.348084807	1.017069633	0.326279301	1.017069633	-0.951974412
ENSG00000131725	WDR44	0.001342851	0.01015024	0.116899899	4.24334342	0.225078289	0.01802934	0.181629656	0.194211541	0.194211541	-0.374858365
ENSG00000196313	POM121	0.001349176	0.010193207	0.114746143	5.146637724	0.231037426	0.00925411	0.195238192	0.136322033	0.195238192	-0.367796825
ENSG00000178202	POGLUT3	0.001351505	0.010196262	0.111173134	4.393045884	0.199835861	0.011855438	0.158334702	0.180100021	0.180100021	-0.356289047
ENSG00000007062	PROM1	0.001354365	0.01021299	0.133292043	6.940123601	0.312143016	0.000951139	0.274985403	0.120594231	0.274985403	-0.427094894
ENSG00000150773	PIH1D2	0.001358109	0.010236365	0.136002004	5.690365615	0.323290511	0.012244239	0.275026495	0.122788036	0.275026495	-0.435670072
ENSG00000136379	ABHD17C	0.001362615	0.010260604	0.099474888	5.717499802	0.176425964	0.005684864	0.147998792	0.122387828	0.147998792	-0.31856386
ENSG00000010626	LRRC23	0.001389823	0.01042105	0.140369615	7.569118416	0.34234368	0.001651099	0.304366913	0.128053507	0.304366913	-0.44872745
ENSG00000143727	ACP1	0.001393278	0.010432192	0.090026256	5.652359532	0.063512735	0.002479327	0.042439124	0.123395576	0.123395576	-0.287727518
ENSG00000175697	GPR156	0.001402044	0.010483701	0.267472161	2.125722762	1.246127195	0.210514899	0.900597374	0.687709936	0.900597374	-0.854367559
ENSG00000025156	HSF2	0.001405584	0.010500731	0.114143084	5.239200683	0.226181639	0.011691748	0.190656745	0.133253003	0.190656745	-0.364516151
ENSG00000134121	CHL1	0.001428971	0.010630224	0.106812555	4.555574259	0.151206	0.010052907	0.106867004	0.167139611	0.167139611	-0.340596866
ENSG00000116729	WLS	0.001429757	0.010630224	0.092778198	5.335465459	0.140901559	0.003223404	0.116065311	0.13046466	0.13046466	-0.295830279
ENSG00000168734	PKIG	0.001442856	0.010712579	0.132819203	6.796606948	0.312187047	0.001739642	0.272242658	0.119678218	0.272242658	-0.423153735
ENSG00000124789	NUP153	0.001448124	0.010746674	0.091232921	5.57557362	0.138053907	0.004469896	0.113863272	0.124801944	0.124801944	-0.290566209
ENSG00000152556	PFKM	0.00146923	0.010882979	0.148963397	3.444833684	0.169590386	0.020294912	0.095040369	0.324340503	0.324340503	-0.473806915
ENSG00000050748	MAPK9	0.001482228	0.010958836	0.10511194	4.692654029	0.100083688	0.013489367	0.057069658	0.158105729	0.158105729	-0.334060533
ENSG00000150054	MPP7	0.001489231	0.010995272	0.10964084	4.410279042	0.196362489	0.008092703	0.147419684	0.178607795	0.178607795	-0.348304149
ENSG00000179104	TMTC2	0.001493336	0.011015345	0.095140249	5.296444811	0.09310843	0.009031256	0.063413091	0.131550622	0.131550622	-0.302163094
ENSG00000214654	B3GALT9	0.00149289	0.011015345	0.116042144	4.242949058	0.174082082	0.014886065	0.131431713	0.194251602	0.194251602	-0.368557063
ENSG00000143742	SRP9	0.001496805	0.011030693	0.087651508	6.407973136	0.07906523	0.000742331	0.056782044	0.118579403	0.118579403	-0.278320038
ENSG00000135587	SMPD2	0.001500254	0.011050991	0.09142208	5.450188508	0.134422405	0.002242284	0.114017334	0.127566165	0.127566165	-0.290231677
ENSG00000141404	GNAL	0.001503881	0.011072575	0.127134494	3.893363298	0.223724973	0.014098508	0.171783343	0.236932616	0.236932616	-0.403516447
ENSG00000089157	RPLP0	0.00152567	0.011215751	0.10560346	9.044846624	0.162236344	0.000110232	0.133965205	0.173093428	0.173093428	-0.334737192
ENSG00000083123	BCKDHB	0.001530054	0.011239249	0.159371424	3.314766379	0.304680351	0.039653404	0.200980689	0.354823587	0.354823587	-0.505035635
ENSG00000101193	GID8	0.001543657	0.011318255	0.09082916	5.669633673	0.048697494	0.005017667	0.022054302	0.123112491	0.123112491	-0.287596773
ENSG00000153936	HS2ST1	0.00154887	0.011343772	0.110577051	4.512198913	0.134478644	0.019561958	0.077961734	0.170340582	0.170340582	-0.350017037
ENSG00000186973	FAM183A	0.001561459	0.011406685	0.154398617	6.974856048	0.420210655	0.001589775	0.368653846	0.120858205	0.368653846	-0.48836469
ENSG00000113946	CLDN16	0.001567215	0.011438222	0.227231787	1.92678935	0.487629445	0.071737627	0.251536731	0.730196944	0.730196944	-0.718493429
ENSG00000179295	PTPN11	0.001579163	0.011520133	0.091600087	5.989699376	0.104592856	0.010632886	0.076213066	0.119681553	0.119681553	-0.289431397
ENSG00000078668	VDAC3	0.001583444	0.01154568	0.087821867	6.25123163	0.069395543	0.001088283	0.050293218	0.118697728	0.118697728	-0.277423963
ENSG00000086200	IPO11	0.001584117	0.01154568	0.102332825	4.701210207	0.159194162	0.005051295	0.127140476	0.157589955	0.157589955	-0.323250519
ENSG00000198721	ECI2	0.001594295	0.011609211	0.195042558	5.521835297	0.666621994	0.011204598	0.579621321	0.125936184	0.579621321	-0.615739325
ENSG00000167291	TBC1D16	0.001604178	0.011665149	0.154600471	3.303083628	0.205617307	0.013631693	0.128575057	0.35758064	0.35758064	-0.487787056
ENSG00000179094	PER1	0.001609091	0.011686786	0.188686782	4.732831946	0.647138196	0.014529042	0.538418238	0.155727072	0.538418238	-0.595166001
ENSG00000054793	ATP9A	0.001610876	0.011692459	0.088606714	6.265642726	0.133822069	0.003263132	0.115495956	0.118673453	0.118673453	-0.279459392
ENSG00000116918	TSNAX	0.001612959	0.011702237	0.109195807	4.38168234	0.184947814	0.00408973	0.134797385	0.181098207	0.181098207	-0.344354765
ENSG00000092439	TRPM7	0.001614904	0.011710999	0.165609631	3.147656575	0.337833433	0.02954707	0.24815816	0.396416003	0.396416003	-0.522200514
ENSG00000175387	SMAD2	0.001631418	0.011819973	0.097682838	4.986383239	0.105228386	0.005421399	0.077971796	0.142774883	0.142774883	-0.307723437
ENSG00000113924	HGD	0.001636092	0.011837653	0.26175212	2.469942966	1.181682987	0.074561975	0.989534943	0.60083703	0.989534943	-0.824360658
ENSG00000091140	DLD	0.001635897	0.011837653	0.099725698	4.814584856	0.103824574	0.003259499	0.07544405	0.151200114	0.151200114	-0.314079028
ENSG00000283022	HYDIN	0.001638713	0.011840443	0.159688163	4.850103426	0.443058133	0.008471901	0.387574636	0.14934926	0.387574636	-0.502846332
ENSG00000157423	HYDIN	0.001638713	0.011840443	0.159688163	4.850103426	0.443058133	0.008471901	0.387574636	0.14934926	0.387574636	-0.502846332
ENSG00000035687	ADSS2	0.001637757	0.011840443	0.091943453	5.375492024	0.128529332	0.001886322	0.108057874	0.129406925	0.129406925	-0.289538879
ENSG00000128708	HAT1	0.001642989	0.011849796	0.089410901	5.861873162	0.068049709	0.003477467	0.038035487	0.120682537	0.120682537	-0.281480278
ENSG00000004700	RECQL	0.001665374	0.01196731	0.205802433	2.550944316	0.747013301	0.033787849	0.624024132	0.577605652	0.624024132	-0.64708551
ENSG00000108588	CCDC47	0.001666058	0.01196731	0.092116611	5.406714835	0.147069856	0.003170464	0.11825161	0.12861778	0.12861778	-0.289622657
ENSG00000061987	MON2	0.00166954	0.011981496	0.106252151	5.129883277	0.198343347	0.031601536	0.143736537	0.13692437	0.143736537	-0.334001099
ENSG00000133115	STOML3	0.001672849	0.011992198	0.209372221	6.805181898	0.770472599	0.002954469	0.677875853	0.119725108	0.677875853	-0.658035255
ENSG00000126581	BECN1	0.001673295	0.011992198	0.092943516	5.353443335	0.073490503	0.004182046	0.047786064	0.12998287	0.12998287	-0.292104612
ENSG00000270670	MARK2P16	0.001679676	0.012032507	0.299305678	1.832627958	1.560490099	0.17796047	1.213371236	0.747980574	1.213371236	-0.940329915
ENSG00000164253	WDR41	0.001691184	0.012104037	0.1344033	3.774106549	0.180304287	0.024377019	0.118586215	0.256179673	0.256179673	-0.421986622
ENSG00000147044	CASK	0.001694581	0.012122891	0.097274496	5.445000985	0.165650885	0.017935161	0.129024704	0.127688958	0.129024704	-0.305355964
ENSG00000166503	HDGFL3	0.001696791	0.012127786	0.165882069	3.203102826	0.284993313	0.045467005	0.147571359	0.381898691	0.381898691	-0.520659765
ENSG00000047644	WWC3	0.001718706	0.012251366	0.114622278	5.043369175	0.246382014	0.022056511	0.181994542	0.140293752	0.181994542	-0.359337622
ENSG00000163818	LZTFL1	0.001723327	0.012278802	0.124174132	5.521311061	0.268493564	0.005795699	0.233680874	0.125947702	0.233680874	-0.389184589
ENSG00000169435	RASSF6	0.001725431	0.012288287	0.114921485	4.393020149	0.179480807	0.025015473	0.121668792	0.180102269	0.180102269	-0.360143938
ENSG00000170788	DYDC1	0.001727675	0.012290272	0.171819071	4.859490682	0.520725366	0.026533323	0.431971073	0.14887067	0.431971073	-0.538385563
ENSG00000149231	CCDC82	0.001742749	0.01238942	0.093132348	5.798071676	0.1464486	0.013357777	0.104724168	0.121352856	0.121352856	-0.291587527
ENSG00000089057	SLC23A2	0.001747897	0.012409368	0.118623854	4.100842792	0.196854017	0.008763572	0.156565731	0.209783417	0.209783417	-0.371295968
ENSG00000186231	KLHL32	0.001758171	0.012454497	0.180710912	3.788433495	0.571833955	0.072702201	0.434486447	0.253687398	0.434486447	-0.565318999
ENSG00000151150	ANK3	0.001773208	0.012538662	0.13293174	4.405263355	0.311716807	0.012794734	0.261652052	0.179039448	0.261652052	-0.415518324
ENSG00000177082	WDR73	0.001780442	0.012578628	0.096980959	5.042421141	0.125282831	0.005741029	0.102030832	0.140333239	0.140333239	-0.303027144
ENSG00000060762	MPC1	0.001786821	0.012618087	0.088281493	6.32502103	0.114460621	0.002441075	0.092487222	0.118602046	0.118602046	-0.275751856
ENSG00000113318	MSH3	0.001798606	0.012690034	0.113756039	6.153094022	0.229907291	0.007829258	0.193149284	0.118934416	0.193149284	-0.355102809
ENSG00000109944	JHY	0.00180122	0.012702837	0.102802927	4.785542307	0.163815337	0.011375471	0.132052416	0.15276351	0.15276351	-0.32086743
ENSG00000248383	PCDHAC1	0.001807324	0.012734587	0.289309301	2.849234839	1.503776748	0.245251367	1.054695379	0.484532731	1.054695379	-0.902700923
ENSG00000174775	HRAS	0.001821796	0.012814225	0.08997836	6.136581085	0.110252351	0.006753169	0.087411025	0.118987833	0.118987833	-0.280538439
ENSG00000172428	COPS9	0.001826514	0.012841338	0.088613514	6.659534759	0.111532332	0.002892886	0.094114951	0.119062417	0.119062417	-0.276215499
ENSG00000138036	DYNC2LI1	0.001828153	0.012847177	0.110407888	5.725669191	0.210228442	0.003256118	0.186065833	0.122272618	0.186065833	-0.344121137
ENSG00000213553	RPLP0P6	0.001832127	0.012858056	0.261350915	1.907901905	1.259765514	0.252479221	0.808358169	0.733889485	0.808358169	-0.814415509
ENSG00000131373	HACL1	0.00183179	0.012858056	0.093457599	5.435536172	0.099830302	0.007738368	0.06954726	0.127914822	0.127914822	-0.291235425
ENSG00000113161	HMGCR	0.001835575	0.012871249	0.132808213	5.348418684	0.326464416	0.025404728	0.248532233	0.130116398	0.248532233	-0.41378016
ENSG00000151690	MFSD6	0.001835627	0.012871249	0.099659116	4.797902737	0.115189915	0.002161032	0.092959317	0.1520924	0.1520924	-0.310499292
ENSG00000013561	RNF14	0.001841972	0.012908599	0.116262513	4.184794663	0.12245258	0.009594834	0.076465759	0.200337908	0.200337908	-0.362110726
ENSG00000109265	CRACD	0.001842577	0.012908599	0.173020513	3.125621968	0.524617376	0.0393466	0.425592382	0.402381301	0.425592382	-0.538872169
ENSG00000158856	DMTN	0.001860153	0.013014519	0.099237049	5.429781056	0.182823455	0.004310452	0.148639186	0.128053336	0.148639186	-0.308795637
ENSG00000164209	SLC25A46	0.001862967	0.013028477	0.105485686	4.581838016	0.14526302	0.007530379	0.110755551	0.165287167	0.165287167	-0.328192411
ENSG00000168827	GFM1	0.001869344	0.013067322	0.099245228	5.344218686	0.10932594	0.022746172	0.062827954	0.130228678	0.130228678	-0.308676634
ENSG00000166275	BORCS7	0.001873978	0.01309396	0.098051378	4.938691572	0.12785261	0.00432575	0.092519395	0.144990878	0.144990878	-0.304891759
ENSG00000141232	TOB1	0.00190249	0.013246594	0.088872296	5.902506574	0.119078287	0.002350801	0.101099584	0.120317846	0.120317846	-0.275952635
ENSG00000235453	SMIM27	0.001903423	0.01324729	0.122373119	5.224707658	0.290964275	0.022495592	0.210084654	0.133706412	0.210084654	-0.379956501
ENSG00000121864	ZNF639	0.001909321	0.013276712	0.118021537	4.17948344	0.153980586	0.015421391	0.102074383	0.200911872	0.200911872	-0.36633725
ENSG00000143502	SUSD4	0.001926609	0.013385216	0.180932771	5.073644018	0.580929712	0.032064032	0.476370731	0.139063008	0.476370731	-0.561130166
ENSG00000111647	BLTP3B	0.001931716	0.013400765	0.171532369	3.048379239	0.419345376	0.03287863	0.28365597	0.424096898	0.424096898	-0.53184207
ENSG00000127328	RAB3IP	0.001961106	0.013571505	0.091737444	6.168157315	0.109517893	0.011816165	0.072336862	0.11888939	0.11888939	-0.284024636
ENSG00000152076	CCDC74B	0.001969948	0.013620831	0.164958256	4.878084782	0.473918981	0.008977166	0.413641702	0.147935051	0.413641702	-0.510500606
ENSG00000260081	MRFAP1P1	0.001977413	0.013666505	0.232476503	3.261325913	1.012742598	0.122108311	0.717272234	0.367464564	0.717272234	-0.719190207
ENSG00000132613	MTSS2	0.001986144	0.013720877	0.114761223	4.335417584	0.226311123	0.003846396	0.200699657	0.185281897	0.200699657	-0.354875727
ENSG00000166347	CYB5A	0.001995625	0.013780389	0.130904793	7.105400061	0.296743892	0.001533953	0.264607097	0.122000173	0.264607097	-0.40461135
ENSG00000185055	EFCAB10	0.002013326	0.013884522	0.161087466	5.502780394	0.465105188	0.008552801	0.394465036	0.12635846	0.394465036	-0.497479903
ENSG00000241258	CRCP	0.002012804	0.013884522	0.117002194	4.144175997	0.118303376	0.007805285	0.075733098	0.204807208	0.204807208	-0.361342151
ENSG00000128609	NDUFA5	0.00203713	0.014024861	0.088458096	6.530287836	0.103219206	0.002817589	0.080709807	0.118710297	0.118710297	-0.272872449
ENSG00000134440	NARS1	0.002046612	0.014083524	0.091548001	5.40479352	0.09544732	0.001500796	0.076255754	0.128665487	0.128665487	-0.282277603
ENSG00000138764	CCNG2	0.002049395	0.014084385	0.201142516	4.144255775	0.724388388	0.012887424	0.61547257	0.204798247	0.61547257	-0.620118189
ENSG00000066926	FECH	0.002061523	0.01413225	0.121971636	4.044580653	0.14475821	0.014474947	0.100778684	0.216581702	0.216581702	-0.37582179
ENSG00000114904	NEK4	0.002059919	0.01413225	0.140876554	4.441395182	0.34455639	0.055124182	0.253108161	0.175977868	0.253108161	-0.434104703
ENSG00000005981	ASB4	0.002070636	0.014175207	0.251858774	2.822502074	1.134950322	0.181052365	0.804126171	0.492956923	0.804126171	-0.775702193
ENSG00000136925	TSTD2	0.002069868	0.014175207	0.178595571	3.49122084	0.564814992	0.139704414	0.355679773	0.3137438	0.355679773	-0.550077897
ENSG00000175854	SWI5	0.002087376	0.014277505	0.09715381	5.16954864	0.149066382	0.011072756	0.12121903	0.135522677	0.135522677	-0.298991859
ENSG00000183576	SETD3	0.002094844	0.014310116	0.095006991	5.144933457	0.07743303	0.003805736	0.054184827	0.136382606	0.136382606	-0.292283857
ENSG00000198894	CIPC	0.002098084	0.014326091	0.119467148	4.026408867	0.157377523	0.002802917	0.125204254	0.218862408	0.218862408	-0.367479159
ENSG00000085465	OVGP1	0.002103684	0.014358165	0.20603411	2.392512396	0.421503759	0.037637632	0.277656749	0.621656213	0.621656213	-0.633594052
ENSG00000185681	MORN5	0.002108412	0.014384254	0.185049668	6.269819615	0.595274247	0.003299947	0.528535638	0.118666925	0.528535638	-0.568939015
ENSG00000080546	SESN1	0.002122911	0.014464546	0.110896549	4.422347802	0.195417294	0.013423522	0.153461111	0.177578004	0.177578004	-0.340726962
ENSG00000126216	TUBGCP3	0.002128999	0.014489462	0.194553631	3.458898857	0.654534253	0.065175296	0.522692206	0.321105072	0.522692206	-0.597594999
ENSG00000103647	CORO2B	0.002129302	0.014489462	0.303067149	2.374023936	1.704674428	0.126620883	1.299901191	0.626522719	1.299901191	-0.930894526
ENSG00000234851	RPL23AP42	0.002131674	0.014496888	0.092276811	7.336971985	0.158272864	0.00140882	0.13083821	0.124622969	0.13083821	-0.283404789
ENSG00000064692	SNCAIP	0.002146548	0.014581852	0.113393287	4.672557636	0.220613708	0.022129991	0.17756881	0.159337637	0.17756881	-0.348023205
ENSG00000092148	HECTD1	0.002158437	0.014647569	0.090765075	7.368830185	0.073438755	0.002904174	0.053996318	0.125045242	0.125045242	-0.278423593
ENSG00000131558	EXOC4	0.002158987	0.014647569	0.119077719	4.080405987	0.117369784	0.008014805	0.07823979	0.212207744	0.212207744	-0.365264107
ENSG00000003989	SLC7A2	0.0021727	0.014690449	0.184152265	6.26019306	0.584266078	0.005525086	0.521164703	0.118682314	0.521164703	-0.564527978
ENSG00000185010	F8	0.002178758	0.014706388	0.135029636	3.814038438	0.247899457	0.033825223	0.153222954	0.249352422	0.249352422	-0.413827661
ENSG00000116151	MORN1	0.002177808	0.014706388	0.120019333	5.833095479	0.253374447	0.005997792	0.217721371	0.120969535	0.217721371	-0.367840979
ENSG00000214290	POU2AF3	0.002206428	0.0148679	0.147831378	5.262724875	0.387298943	0.011331447	0.328085888	0.132536802	0.328085888	-0.452503083
ENSG00000155755	TMEM237	0.002215219	0.014914496	0.112046235	4.400498147	0.164400407	0.015530792	0.113735118	0.17945156	0.17945156	-0.342833451
ENSG00000116209	TMEM59	0.002224548	0.014955274	0.098344677	8.450912653	0.073245886	0.000763826	0.050158613	0.149447434	0.149447434	-0.300786309
ENSG00000067064	IDI1	0.002223862	0.014955274	0.146041755	6.146452012	0.396566405	0.00220314	0.329046073	0.118955381	0.329046073	-0.446680879
ENSG00000172578	KLHL6	0.002226281	0.014957295	0.097610702	6.228559712	0.163560093	0.00246669	0.145510794	0.118741251	0.145510794	-0.298518675
ENSG00000105373	NOP53	0.002235835	0.014996129	0.088721362	6.768869832	0.148093356	0.001088501	0.121163836	0.11953332	0.121163836	-0.271218922
ENSG00000181610	MRPS23	0.002237775	0.015002813	0.10290806	4.80446133	0.170333415	0.012735092	0.139953658	0.151739778	0.151739778	-0.314560535
ENSG00000188921	HACD4	0.002245657	0.015042968	0.093781288	5.261740667	0.150145449	0.004028192	0.119829456	0.132566289	0.132566289	-0.286563736
ENSG00000101079	NDRG3	0.002247667	0.01505009	0.095069151	5.250021057	0.089747483	0.007451249	0.061724578	0.132920594	0.132920594	-0.290473504
ENSG00000101849	TBL1X	0.00226505	0.015128099	0.103122317	5.314158259	0.206440033	0.008386976	0.156773487	0.131050598	0.156773487	-0.314840754
ENSG00000108830	RND2	0.002265979	0.015128099	0.153065844	4.256133529	0.41578082	0.023773178	0.340106124	0.192920897	0.340106124	-0.467303541
ENSG00000164675	IQUB	0.002291703	0.015293413	0.13044155	4.989589859	0.29110613	0.014270238	0.249990517	0.142629275	0.249990517	-0.397790453
ENSG00000103460	TOX3	0.002295573	0.015312813	0.104978441	4.718761386	0.169697236	0.01461177	0.136726835	0.156547728	0.156547728	-0.320085742
ENSG00000022267	FHL1	0.002305209	0.015370638	0.223304142	2.199167088	0.870673965	0.103972888	0.663677223	0.670478793	0.670478793	-0.680587062
ENSG00000254806	SYS1-DBNDD2	0.002306662	0.015373877	0.319322378	2.25048209	1.765663286	0.30686973	1.276781267	0.657988898	1.276781267	-0.973171279
ENSG00000180881	CAPS2	0.002340559	0.015593264	0.108231686	4.563046583	0.181852545	0.015326023	0.143833691	0.166606198	0.166606198	-0.32937356
ENSG00000121413	ZSCAN18	0.002356454	0.015686013	0.110384051	6.028791654	0.209333161	0.003380325	0.185859888	0.119454629	0.185859888	-0.335698823
ENSG00000139998	RAB15	0.002366902	0.015731358	0.130211053	5.359550529	0.29518664	0.00827104	0.255056616	0.129821727	0.255056616	-0.395823031
ENSG00000162804	SNED1	0.002374606	0.015760643	0.186363041	2.844423503	0.485257502	0.053365823	0.364154606	0.486045859	0.486045859	-0.566334635
ENSG00000161243	FBXO27	0.002380409	0.015785975	0.168183381	3.235474878	0.380301961	0.065538745	0.249550428	0.373767047	0.373767047	-0.510965176
ENSG00000285976		0.002380335	0.015785975	0.387286164	4.893818885	2.623698921	0.361722267	1.967788559	0.147155692	1.967788559	-1.176634426
ENSG00000198961	PJA2	0.002381516	0.015786728	0.113016287	5.572700083	0.246875902	0.003329945	0.195043181	0.124859479	0.195043181	-0.34334382
ENSG00000164010	ERMAP	0.002384108	0.015797323	0.116077973	4.237595496	0.138915521	0.014469806	0.097886739	0.194797025	0.194797025	-0.352607176
ENSG00000277531	PNMA8C	0.002387488	0.015809311	0.249131504	1.929400112	1.037369599	0.234276233	0.647595121	0.729681675	0.729681675	-0.756674204
ENSG00000170634	ACYP2	0.002390035	0.015816816	0.098323758	5.056622387	0.1108533	0.010399539	0.082544184	0.139747823	0.139747823	-0.298602057
ENSG00000115944	COX7A2L	0.002394206	0.015837827	0.091099398	5.606736657	0.088576283	0.00469254	0.054443848	0.124201187	0.124201187	-0.276614317
ENSG00000152760	DYNLT5	0.00240619	0.015898386	0.140437783	4.588808179	0.340149429	0.015502801	0.290812508	0.164805887	0.290812508	-0.426213996
ENSG00000187260	WDR86	0.002421658	0.015979522	0.150701764	4.699009535	0.421683923	0.018663009	0.334062966	0.157722125	0.334062966	-0.457072787
ENSG00000173253	DMRT2	0.002473941	0.016250317	0.145892776	5.443088252	0.363557291	0.024349181	0.306224554	0.127734411	0.306224554	-0.441546041
ENSG00000019995	ZRANB1	0.002488809	0.016314272	0.248786492	3.746703606	1.061665686	0.074721789	0.886568072	0.261076514	0.886568072	-0.752504185
ENSG00000164985	PSIP1	0.002530656	0.016540834	0.090381644	5.992520956	0.104938804	0.007206637	0.080882575	0.119664036	0.119664036	-0.272921075
ENSG00000083307	GRHL2	0.002557297	0.016681819	0.165040628	4.774804806	0.509017353	0.044499836	0.378541207	0.153353617	0.378541207	-0.497841436
ENSG00000280571		0.002583914	0.016833561	0.431944563	4.925162007	3.460028373	0.659387801	2.238334705	0.145634961	2.238334705	-1.301594764
ENSG00000025772	TOMM34	0.002594882	0.016883035	0.088253442	6.316833345	0.090923871	0.002357055	0.074428028	0.118609155	0.118609155	-0.265823955
ENSG00000003096	KLHL13	0.002604347	0.016883035	0.230276577	3.570237672	0.91666386	0.06115666	0.762412925	0.296285203	0.762412925	-0.693350455
ENSG00000143819	EPHX1	0.002605315	0.016883035	0.158316314	8.492471051	0.436181034	0.000413746	0.388857305	0.150829487	0.388857305	-0.476664095
ENSG00000175267	VWA3A	0.002605122	0.016883035	0.175364578	5.606740752	0.538410023	0.008347075	0.46927514	0.124201111	0.46927514	-0.527997534
ENSG00000291120	MRPL45P2	0.002603413	0.016883035	0.179767191	3.541365378	0.591523699	0.08632478	0.415580349	0.302565372	0.415580349	-0.541288977
ENSG00000180209	MYL11	0.00262017	0.016972383	0.338135724	2.848727369	2.017449284	0.218582992	1.557171343	0.484692256	1.557171343	-1.017486494
ENSG00000158113	LRRC43	0.00262419	0.016991495	0.176341699	4.479697473	0.536242316	0.015957859	0.467001751	0.172862326	0.467001751	-0.530548872
ENSG00000101350	KIF3B	0.002635218	0.017044377	0.089372677	7.206023241	0.123848255	0.001009327	0.108470046	0.123044539	0.123044539	-0.268776401
ENSG00000080572	DNAAF6	0.002671633	0.017214541	0.150160056	5.79735089	0.387000826	0.011353939	0.338840798	0.12136115	0.338840798	-0.450959576
ENSG00000198612	COPS8	0.002676992	0.017233825	0.098487032	4.928972105	0.081680608	0.005193589	0.056106707	0.145452851	0.145452851	-0.295715462
ENSG00000102230	PCYT1B	0.002677878	0.017233825	0.135136404	4.432063393	0.312821177	0.027772115	0.255853521	0.176758001	0.255853521	-0.40574462
ENSG00000180425	C11orf71	0.002681622	0.017250934	0.101066168	4.860961348	0.108780852	0.009843801	0.073241949	0.148796077	0.148796077	-0.303406373
ENSG00000168273	SMIM4	0.002694525	0.017319921	0.135929	4.912263709	0.332810158	0.021704123	0.265258287	0.146255807	0.265258287	-0.407867911
ENSG00000048707	VPS13D	0.00270504	0.017373463	0.102565087	4.823906757	0.125147708	0.012672326	0.090074252	0.150708044	0.150708044	-0.30763463
ENSG00000283515		0.002707112	0.017379749	0.408027753	1.496442103	2.856446127	0.683340699	1.902371453	0.797842476	1.902371453	-1.223746877
ENSG00000169359	SLC33A1	0.002725932	0.017479393	0.104786563	4.805056225	0.136824667	0.018826476	0.09408126	0.151707911	0.151707911	-0.314052069
ENSG00000170485	NPAS2	0.002730149	0.017499373	0.143705741	3.583955968	0.207226653	0.027391209	0.137651227	0.293345748	0.293345748	-0.430627627
ENSG00000138400	MDH1B	0.002749896	0.01760586	0.152014286	5.658038092	0.40067228	0.008510834	0.350385959	0.123301219	0.350385959	-0.455190825
ENSG00000071282	LMCD1	0.002756756	0.017634361	0.238405302	3.876356315	1.043427631	0.031740191	0.850999365	0.239463263	0.850999365	-0.713698443
ENSG00000124181	PLCG1	0.002767981	0.017677714	0.161355008	3.279845246	0.369244336	0.041300778	0.282177956	0.363056877	0.363056877	-0.482837873
ENSG00000005469	CROT	0.00276678	0.017677714	0.111329243	4.348929633	0.117264192	0.008455098	0.085735445	0.184039824	0.184039824	-0.333155782
ENSG00000138796	HADH	0.00276737	0.017677714	0.090515741	5.803834638	0.13276879	0.005960288	0.108007248	0.121287133	0.121287133	-0.270864924
ENSG00000134283	PPHLN1	0.002770623	0.017687478	0.091473845	5.605334396	0.0798027	0.005728173	0.055532773	0.12422732	0.12422732	-0.273699216
ENSG00000273592	MBOAT7	0.002803444	0.017875472	0.430347524	3.033474193	3.210561024	0.215424854	2.660909625	0.428419991	2.660909625	-1.286096424
ENSG00000133318	RTN3	0.002809095	0.017882807	0.102892002	6.611691202	0.213826365	0.000757655	0.163665888	0.118906353	0.163665888	-0.307430113
ENSG00000149292	TTC12	0.002823256	0.017958571	0.118215004	5.173375656	0.238329031	0.006839681	0.210203412	0.135391814	0.210203412	-0.353031857
ENSG00000120437	ACAT2	0.002826643	0.017972928	0.099501482	5.663858826	0.198017369	0.005431017	0.148334825	0.123205822	0.148334825	-0.29711017
ENSG00000152234	ATP5F1A	0.002836143	0.018011717	0.088898624	7.103817582	0.083773063	0.000756438	0.068202026	0.121984899	0.121984899	-0.265358944
ENSG00000123219	CENPK	0.002844653	0.018055158	0.180474848	2.978478656	0.407125702	0.061166795	0.285529372	0.444697632	0.444697632	-0.538544992
ENSG00000115183	TANC1	0.002845729	0.018055158	0.099671752	4.94003351	0.149527613	0.009365167	0.124559263	0.144927383	0.144927383	-0.297413416
ENSG00000177917	ARL6IP6	0.002846391	0.018055158	0.124455923	4.527455715	0.264203033	0.020143739	0.220420968	0.169193869	0.220420968	-0.371358773
ENSG00000131375	CAPN7	0.002849601	0.018068313	0.118105561	4.14437654	0.093814065	0.01185672	0.052524024	0.204784685	0.204784685	-0.352369453
ENSG00000170100	ZNF778	0.002888061	0.018283005	0.256306126	3.001695153	1.202354061	0.176733984	0.843544534	0.437766246	0.843544534	-0.763640467
ENSG00000054983	GALC	0.002899816	0.018320936	0.104253562	4.620915592	0.135891168	0.006161319	0.106657248	0.162642618	0.162642618	-0.310484113
ENSG00000166734	GOLM2	0.002907517	0.018362292	0.094871693	5.142536277	0.08297176	0.003321273	0.048822771	0.136468071	0.136468071	-0.282466252
ENSG00000198185	ZNF334	0.0029217	0.0184299	0.138852058	3.755214251	0.244706943	0.039899301	0.171943245	0.259537662	0.259537662	-0.413204018
ENSG00000142082	SIRT3	0.00293284	0.018485501	0.108746947	4.50951611	0.107612114	0.013123976	0.072176571	0.170544626	0.170544626	-0.323488539
ENSG00000177181	RIMKLA	0.002954221	0.018612883	0.18226771	3.054918999	0.559537214	0.093752105	0.417456482	0.422212895	0.422212895	-0.541783771
ENSG00000203880	PCMTD2	0.002968695	0.018674469	0.164282362	3.092953416	0.149866964	0.007744353	0.077725017	0.411418366	0.411418366	-0.488076481
ENSG00000166971	AKTIP	0.00296864	0.018674469	0.108614539	4.465203746	0.126841806	0.009198764	0.092632029	0.174022848	0.174022848	-0.322690172
ENSG00000260914		0.002997898	0.018828364	0.262440911	4.509356026	1.185637962	0.175424616	0.894279932	0.170556824	0.894279932	-0.778912381
ENSG00000108582	CPD	0.003001461	0.018835858	0.140253853	4.212494352	0.3691705	0.00308974	0.302423738	0.197394149	0.302423738	-0.416215683
ENSG00000163399	ATP1A1	0.00301275	0.018892741	0.090100276	7.373827723	0.101183126	0.000969116	0.085996351	0.125112861	0.125112861	-0.26727652
ENSG00000180638	SLC47A2	0.003015095	0.018893179	0.304538132	2.462171656	1.579530259	0.13837763	1.302025739	0.602973968	1.302025739	-0.903319406
ENSG00000139263	LRIG3	0.003027704	0.018933272	0.1301162	3.8198066	0.20698734	0.01454685	0.162147961	0.248397301	0.248397301	-0.385782972
ENSG00000106701	FSD1L	0.003034089	0.018958288	0.130551591	3.853928408	0.265484413	0.021794732	0.2137237	0.242912073	0.242912073	-0.386989239
ENSG00000108406	DHX40	0.003057695	0.019098278	0.106403621	4.477671029	0.095045252	0.002815122	0.059351303	0.173023222	0.173023222	-0.315154483
ENSG00000129514	FOXA1	0.003077504	0.019199375	0.090743515	5.514053097	0.132420308	0.001780902	0.117284182	0.126107738	0.126107738	-0.268590685
ENSG00000168575	SLC20A2	0.003084211	0.019218587	0.094404354	5.143828663	0.137824834	0.001993575	0.119024259	0.136421956	0.136421956	-0.279363041
ENSG00000171574	ZNF584	0.003082089	0.019218587	0.120221143	4.137358833	0.187125777	0.018896582	0.13214529	0.205575571	0.205575571	-0.355786038
ENSG00000182329	KIAA2012	0.00308777	0.019233223	0.164513911	5.450757006	0.462328523	0.007462285	0.412882848	0.127552751	0.412882848	-0.486774022
ENSG00000004139	SARM1	0.003100685	0.019298549	0.163751798	3.295719559	0.289291916	0.057142202	0.180051094	0.359317442	0.359317442	-0.48430835
ENSG00000285943		0.003111562	0.019358666	0.204766155	4.139711842	0.716623916	0.069028679	0.582175414	0.20530976	0.582175414	-0.60539033
ENSG00000008405	CRY1	0.003123435	0.019424928	0.133657427	3.711827635	0.210595467	0.009903793	0.165735972	0.267547632	0.267547632	-0.395000657
ENSG00000123562	MORF4L2	0.003149825	0.019566087	0.087859972	6.632919924	0.078328704	0.000918121	0.060915612	0.118971859	0.118971859	-0.259426329
ENSG00000158828	PINK1	0.003154706	0.019588752	0.088593342	6.671520477	0.109861264	0.002793517	0.081620862	0.119106268	0.119106268	-0.261549416
ENSG00000235106	BRD3OS	0.003163331	0.019619319	0.122889587	5.109000674	0.260911585	0.008185983	0.226361589	0.137696977	0.226361589	-0.362696787
ENSG00000167702	KIFC2	0.003165931	0.019620131	0.14344413	3.611860084	0.317795138	0.032108857	0.244759926	0.287461383	0.287461383	-0.42332515
ENSG00000131831	RAI2	0.003170148	0.019638609	0.217179764	3.779898836	0.909442705	0.043061779	0.689491949	0.255166374	0.689491949	-0.640840774
ENSG00000184154	LRRC51	0.003174187	0.019648314	0.165721088	6.008451279	0.466313745	0.010873037	0.415663581	0.119568504	0.415663581	-0.488934481
ENSG00000133119	RFC3	0.003184568	0.019704899	0.164217182	3.240640316	0.280417808	0.046336222	0.178326397	0.37249395	0.37249395	-0.484331772
ENSG00000082438	COBLL1	0.003188833	0.019715945	0.181263481	2.891961352	0.271691722	0.039123971	0.166100033	0.471171134	0.471171134	-0.534532062
ENSG00000182919	C11orf54	0.003196955	0.019735456	0.108194591	4.501516663	0.127910626	0.010650166	0.088803345	0.171157365	0.171157365	-0.318972461
ENSG00000140450	ARRDC4	0.003261854	0.020089282	0.092323183	5.46781506	0.126366135	0.005225936	0.098971091	0.127154043	0.127154043	-0.271607309
ENSG00000069535	MAOB	0.003267529	0.020116439	0.25967927	3.694172749	1.158270472	0.023153104	1.024157093	0.270921681	1.024157093	-0.76381553
ENSG00000134874	DZIP1	0.003279349	0.020170765	0.118451273	5.326441817	0.245277653	0.036140376	0.181771166	0.130710785	0.181771166	-0.348277774
ENSG00000105176	URI1	0.003293674	0.020246033	0.110860514	4.385141213	0.099376154	0.010084244	0.06226431	0.18079317	0.18079317	-0.325809207
ENSG00000280987	MATR3	0.003298041	0.020265042	0.201223685	2.901163595	0.507164485	0.160552957	0.267133127	0.468314274	0.468314274	-0.591295898
ENSG00000143321	HDGF	0.003313346	0.020343359	0.088691448	7.060309124	0.062145323	0.000591123	0.045608997	0.121578788	0.121578788	-0.260492547
ENSG00000185567	AHNAK2	0.003341462	0.020500147	0.189894372	7.035097898	0.621958795	0.005780582	0.55426704	0.12135562	0.55426704	-0.557234337
ENSG00000136710	CCDC115	0.003351181	0.020543913	0.090309012	5.746221016	0.093855533	0.004673544	0.069867745	0.1219933	0.1219933	-0.2649253
ENSG00000166313	APBB1	0.003355869	0.020556799	0.184060208	5.96021752	0.576069738	0.005455833	0.520707507	0.119875685	0.520707507	-0.539868509
ENSG00000290623		0.003376754	0.020668801	0.227831716	2.362388986	0.880537327	0.140678945	0.665495692	0.629565206	0.665495692	-0.667816125
ENSG00000170962	PDGFD	0.003401477	0.02080413	0.253191521	2.436230655	1.154826984	0.128709608	0.866922938	0.609998313	0.866922938	-0.741576388
ENSG00000134897	BIVM	0.003508172	0.021374436	0.113074377	4.345128527	0.173922362	0.014189575	0.132472303	0.184387529	0.184387529	-0.33009815
ENSG00000174898	CATSPERD	0.003519404	0.021426444	0.199572652	6.956475826	0.692053315	0.015144815	0.603445087	0.120716442	0.603445087	-0.582413784
ENSG00000265681	RPL17	0.003577522	0.021746956	0.097868132	8.390230298	0.171004515	0.000323747	0.148435292	0.14749637	0.148435292	-0.28510886
ENSG00000134278	SPIRE1	0.003594648	0.021827698	0.196214201	2.590367196	0.295855521	0.032167471	0.180727688	0.565778083	0.565778083	-0.571317378
ENSG00000125375	DMAC2L	0.003597098	0.021832559	0.097582307	5.241876974	0.119295545	0.014721098	0.086977623	0.133170306	0.133170306	-0.284109877
ENSG00000051108	HERPUD1	0.003606197	0.021879431	0.088828362	5.965438593	0.12351786	0.002707589	0.10534548	0.119839803	0.119839803	-0.25855274
ENSG00000291121		0.003629516	0.02198734	0.302200481	2.215211375	1.54566135	0.301785806	1.11658921	0.666612363	1.11658921	-0.879006216
ENSG00000108946	PRKAR1A	0.003639665	0.022040425	0.092704767	7.821935568	0.112411004	0.000714542	0.089464429	0.132761987	0.132761987	-0.269568079
ENSG00000288920	RPSAP58	0.003651851	0.022088976	0.108764895	5.391379516	0.237304931	0.007941602	0.175787631	0.129001634	0.175787631	-0.316154205
ENSG00000140519	RHCG	0.003658028	0.022109511	0.364107314	3.381183266	2.509949916	0.07730993	1.981705381	0.339168488	1.981705381	-1.058182602
ENSG00000148814	LRRC27	0.003677185	0.022208412	0.113531663	5.418922291	0.21858496	0.014427268	0.185759224	0.128317175	0.185759224	-0.329764472
ENSG00000172465	TCEAL1	0.003707062	0.02237185	0.102957822	4.775246562	0.187176232	0.010437498	0.154196478	0.153329207	0.154196478	-0.298790766
ENSG00000166260	COX11	0.003721533	0.02241663	0.103714539	4.830993101	0.167662966	0.01672588	0.119603006	0.150337033	0.150337033	-0.300860205
ENSG00000145332	KLHL8	0.003735938	0.022494873	0.107345759	4.514692149	0.13072272	0.008814402	0.077702047	0.170151606	0.170151606	-0.31126385
ENSG00000127980	PEX1	0.003773877	0.022714707	0.107864192	4.759751833	0.11558832	0.026506477	0.067851399	0.154192362	0.154192362	-0.312425314
ENSG00000214827	MTCP1	0.003787173	0.022786107	0.253210945	1.46667148	1.067894873	0.194615378	0.743207919	0.801169941	0.801169941	-0.733138242
ENSG00000071539	TRIP13	0.003824473	0.02295839	0.151324942	3.955145004	0.391884148	0.021436216	0.334212957	0.228228722	0.334212957	-0.437675305
ENSG00000170324	FRMPD2	0.003839672	0.02302355	0.197736142	5.084572229	0.66284392	0.025916806	0.581340689	0.138632791	0.581340689	-0.571663422
ENSG00000163082	SGPP2	0.003871585	0.023179928	0.088148669	6.564826886	0.083372981	0.001896346	0.064014237	0.118782817	0.118782817	-0.254612101
ENSG00000100814	CCNB1IP1	0.003885502	0.023219526	0.138060372	4.499086632	0.327648438	0.019331905	0.276700225	0.171344796	0.276700225	-0.398623205
ENSG00000164898	FMC1	0.003884174	0.023219526	0.116046089	4.515315779	0.241958296	0.019230656	0.189921231	0.170104435	0.189921231	-0.335073608
ENSG00000118564	FBXL5	0.003881581	0.023219526	0.132638531	5.391139078	0.332249282	0.001431935	0.271805484	0.129007709	0.271805484	-0.383010798
ENSG00000166033	HTRA1	0.003892308	0.023251455	0.153784454	4.226600142	0.467856401	0.041655297	0.325648688	0.195926549	0.325648688	-0.443938842
ENSG00000205744	DENND1C	0.003915126	0.023356195	0.112093445	4.370417942	0.217782092	0.010475203	0.184671492	0.182098991	0.184671492	-0.323380673
ENSG00000102471	NDFIP2	0.003915718	0.023356195	0.088825639	6.722881775	0.131587689	0.003224067	0.117190716	0.119315814	0.119315814	-0.256250671
ENSG00000153093	ACOXL	0.003919071	0.023367421	0.22766516	1.751898094	0.405190557	0.043049352	0.241050298	0.761947013	0.761947013	-0.656723692
ENSG00000137691	CFAP300	0.003941394	0.023456533	0.142430507	5.939523732	0.344054835	0.006758394	0.308311428	0.120024473	0.308311428	-0.410600736
ENSG00000118007	STAG1	0.003955924	0.023516592	0.123477368	4.357594965	0.285649745	0.025390557	0.211406061	0.183252119	0.211406061	-0.355819195
ENSG00000039560	RAI14	0.003968127	0.023580315	0.130334246	3.802292497	0.132117962	0.012504296	0.08398199	0.251321866	0.251321866	-0.375451838
ENSG00000123119	NECAB1	0.003969847	0.023581719	0.281016794	1.557460217	1.447250335	0.069331215	1.157162481	0.790453594	1.157162481	-0.80948233
ENSG00000116885	OSCP1	0.003983449	0.023644847	0.12214662	6.347250196	0.251308857	0.002456788	0.229263296	0.118587159	0.229263296	-0.351717463
ENSG00000142892	PIGK	0.004004665	0.023753041	0.114541462	4.375124418	0.18112127	0.022083951	0.134560134	0.181679467	0.181679467	-0.329626742
ENSG00000118492	ADGB	0.004007961	0.023763723	0.164790101	5.210879119	0.460811971	0.016607109	0.405150582	0.134148007	0.405150582	-0.474189204
ENSG00000152133	GPATCH11	0.004010935	0.023772491	0.123612689	4.244064873	0.264099367	0.043177627	0.189984731	0.194138294	0.194138294	-0.355670847
ENSG00000171951	SCG2	0.004019648	0.023815252	0.238340136	0.678821187	0.819826264	0.061394021	0.651455693	0.820863028	0.820863028	-0.685612982
ENSG00000127870	RNF6	0.004071675	0.024087589	0.104420616	4.599447215	0.158885319	0.005265941	0.134702846	0.164079407	0.164079407	-0.299953935
ENSG00000108384	RAD51C	0.004083387	0.024129933	0.098178569	5.355646198	0.166739192	0.01977966	0.117499341	0.129924601	0.129924601	-0.281934201
ENSG00000137942	FNBP1L	0.004091633	0.024151727	0.099187419	4.978338213	0.139987958	0.009653738	0.110561717	0.143142952	0.143142952	-0.284768014
ENSG00000145703	IQGAP2	0.004122716	0.024326168	0.115447302	4.210122821	0.180714735	0.00935609	0.13182846	0.197642956	0.197642956	-0.33117401
ENSG00000151575	TEX9	0.00414414	0.024425382	0.094971777	5.417568316	0.152949448	0.008725615	0.131358825	0.128350305	0.131358825	-0.272281834
ENSG00000187446	CHP1	0.004163852	0.024514292	0.093348939	5.235996893	0.120248667	0.001985517	0.093546077	0.133352418	0.133352418	-0.267488979
ENSG00000066697	MSANTD3	0.004221154	0.024824069	0.112174198	4.418889912	0.148810722	0.017556186	0.100401293	0.177871783	0.177871783	-0.320946526
ENSG00000198718	TOGARAM1	0.004249332	0.024962079	0.116855269	5.165373885	0.232442969	0.027435973	0.184642881	0.135666289	0.184642881	-0.334093188
ENSG00000142731	PLK4	0.004251331	0.024964592	0.237719585	3.011444858	0.971121402	0.080038061	0.797630814	0.434880837	0.797630814	-0.679612924
ENSG00000249242	TMEM150C	0.004258496	0.024988209	0.13605094	4.761422383	0.318564777	0.01334491	0.274132592	0.154098607	0.274132592	-0.388881281
ENSG00000196507	TCEAL3	0.004262255	0.025001034	0.090290161	5.713611811	0.08703688	0.004170462	0.067611904	0.122443508	0.122443508	-0.258055659
ENSG00000004777	ARHGAP33	0.00426473	0.025006324	0.229098035	2.298877903	0.920712277	0.085374944	0.729786254	0.645888926	0.729786254	-0.654736169
ENSG00000137960	GIPC2	0.004280477	0.025080155	0.176919138	3.476724875	0.536824327	0.041626523	0.444501212	0.31703169	0.444501212	-0.505407857
ENSG00000144134	RABL2A	0.004286561	0.0250973	0.134737272	6.122068621	0.313170715	0.007162731	0.274789979	0.119038437	0.274789979	-0.384845467
ENSG00000247746	USP51	0.00429824	0.025137907	0.199067167	3.893572002	0.67087716	0.018354294	0.597106005	0.236902019	0.597106005	-0.568416761
ENSG00000179593	ALOX15B	0.00429707	0.025137907	0.360454062	3.312744838	2.428932103	0.06505077	1.952853776	0.355300761	1.952853776	-1.029272366
ENSG00000006534	ALDH3B1	0.004300054	0.025139265	0.127681582	7.596354412	0.278767046	0.000408577	0.25278768	0.1285108	0.25278768	-0.364565122
ENSG00000082153	BZW1	0.004304857	0.025148844	0.145725332	5.023281677	0.370623813	0.003063773	0.326751588	0.141143092	0.326751588	-0.4160332
ENSG00000237004	ZNRF2P1	0.004343822	0.025367153	0.239604816	2.160427749	1.047914538	0.168759695	0.722885053	0.679664949	0.722885053	-0.683365003
ENSG00000122507	BBS9	0.004378016	0.02555745	0.113026077	5.312266783	0.220073593	0.027203393	0.171204103	0.131103422	0.171204103	-0.322074252
ENSG00000162627	SNX7	0.004421903	0.025757921	0.091138398	5.643081585	0.121104149	0.005451599	0.103483053	0.123552512	0.123552512	-0.25941475
ENSG00000155096	AZIN1	0.004430832	0.0257929	0.110345776	7.402352213	0.225674677	0.001286024	0.187822975	0.125505992	0.187822975	-0.314015419
ENSG00000187017	ESPN	0.004443377	0.025844099	0.161321117	4.923622386	0.437630064	0.012187411	0.392000398	0.145708715	0.392000398	-0.458932727
ENSG00000123066	MED13L	0.004478712	0.026011548	0.133319837	5.038227373	0.313543341	0.014642598	0.261409034	0.140508619	0.261409034	-0.378937064
ENSG00000147475	ERLIN2	0.004506644	0.026145116	0.098524074	4.925183756	0.086248327	0.005125858	0.061221409	0.14563392	0.14563392	-0.279841191
ENSG00000145715	RASA1	0.004543759	0.026331608	0.098857575	4.962240773	0.101199948	0.007895723	0.073501129	0.14388642	0.14388642	-0.280529721
ENSG00000156471	PTDSS1	0.0045965	0.026607948	0.095055457	5.158647017	0.076862508	0.00443181	0.053550806	0.135899595	0.135899595	-0.269390025
ENSG00000116704	SLC35D1	0.004603487	0.02661951	0.131471436	4.027153231	0.248503633	0.049681958	0.148789099	0.218768148	0.218768148	-0.372530187
ENSG00000173947	PIFO	0.004606861	0.026629334	0.149945631	8.395505897	0.378232968	0.000988165	0.348207147	0.147662878	0.348207147	-0.424842531
ENSG00000241935	HOGA1	0.004612253	0.026650808	0.195986833	3.5912646	0.657016764	0.105993883	0.490566708	0.291792006	0.490566708	-0.555218278
ENSG00000093183	SEC22C	0.00461967	0.026664586	0.109873992	4.403389602	0.111984289	0.008294121	0.081735898	0.179201262	0.179201262	-0.311209617
ENSG00000006282	SPATA20	0.004648606	0.026782979	0.110382503	4.461543065	0.205911639	0.00673213	0.182502775	0.174319581	0.182502775	-0.31242951
ENSG00000181751	MACIR	0.004651623	0.026787555	0.156431565	4.277402656	0.43769764	0.059779346	0.320278367	0.190811254	0.320278367	-0.442735505
ENSG00000113119	TMCO6	0.004675378	0.02689823	0.123924802	4.005714102	0.182370363	0.017003786	0.142019726	0.221512061	0.221512061	-0.350532264
ENSG00000171703	TCEA2	0.004700416	0.026987444	0.104643741	5.512985868	0.186885826	0.007373624	0.162696207	0.126131361	0.162696207	-0.295815141
ENSG00000137492	THAP12	0.004698143	0.026987444	0.091854533	5.534526069	0.119028066	0.005380413	0.093757769	0.125659007	0.125659007	-0.259675835
ENSG00000172765	TMCC1	0.004701071	0.026987444	0.156155606	3.351172369	0.285860242	0.032486378	0.210741671	0.346231608	0.346231608	-0.441425952
ENSG00000169967	MAP3K2	0.004703156	0.026989666	0.11002166	6.249133535	0.230452052	0.002325141	0.18567456	0.118701489	0.18567456	-0.310997328
ENSG00000185345	PRKN	0.004706084	0.02699672	0.198378886	2.849604381	0.582808083	0.126795132	0.393410281	0.484416574	0.484416574	-0.560716441
ENSG00000139323	POC1B	0.00470952	0.027006684	0.115335047	4.196954367	0.116702647	0.007561242	0.082413869	0.199035452	0.199035452	-0.325966691
ENSG00000174132	FAM174A	0.004746399	0.027198546	0.101641907	6.222832362	0.177500455	0.001655973	0.158796488	0.11875323	0.158796488	-0.287012295
ENSG00000115750	TAF1B	0.004751856	0.027208467	0.192034341	3.156129503	0.635805196	0.054491253	0.518250137	0.394151132	0.518250137	-0.542188061
ENSG00000163083	INHBB	0.004763886	0.027249632	0.166011182	5.782720198	0.463918239	0.004834993	0.423196235	0.121533158	0.423196235	-0.468579929
ENSG00000102547	CAB39L	0.004769665	0.027272875	0.106501448	4.538453156	0.156338885	0.007780378	0.118676084	0.168381446	0.168381446	-0.300567509
ENSG00000164972	C9orf24	0.004776022	0.027289591	0.163395919	8.350690844	0.455174121	0.000534126	0.414117315	0.146267048	0.414117315	-0.461064823
ENSG00000174628	IQCK	0.004802856	0.027432435	0.105961265	5.405231967	0.191483855	0.008914705	0.165464638	0.128654591	0.165464638	-0.298807288
ENSG00000137177	KIF13A	0.004809526	0.027451425	0.093422832	5.636691506	0.154349626	0.011889661	0.114766019	0.123662619	0.123662619	-0.263407716
ENSG00000197496	SLC2A10	0.004815364	0.027474884	0.13100779	4.683295663	0.291009612	0.01252495	0.25403507	0.158675777	0.25403507	-0.369328315
ENSG00000114480	GBE1	0.004865395	0.02774043	0.134820264	3.686850803	0.182470447	0.009960382	0.12765039	0.272339773	0.272339773	-0.379628677
ENSG00000173890	GPR160	0.004882201	0.027812942	0.122311067	4.361035424	0.272609731	0.007057188	0.225287248	0.182941269	0.225287248	-0.344269582
ENSG00000196704	AMZ2	0.004902247	0.027890523	0.089113728	6.101226227	0.102596175	0.004218658	0.08046192	0.119117381	0.119117381	-0.250711487
ENSG00000018610	STEEP1	0.004909178	0.027909978	0.103158327	4.809860992	0.075963535	0.01382459	0.040111198	0.151451241	0.151451241	-0.290177527
ENSG00000282283	PLPPR3	0.00491744	0.027946951	0.341328525	1.54708148	2.040210282	0.155615021	1.653832279	0.791763993	1.653832279	-0.959949918
ENSG00000126950	TMEM35A	0.004964122	0.028182029	0.252396548	1.310193641	0.981477407	0.173776695	0.668956074	0.815613478	0.815613478	-0.709070942
ENSG00000158109	TPRG1L	0.004974239	0.028214106	0.088130633	6.612977906	0.065183886	0.001719629	0.044202031	0.118910153	0.118910153	-0.247532271
ENSG00000112530	PACRG	0.004979261	0.028227651	0.146214391	5.328309551	0.360787688	0.008095532	0.323937283	0.130659601	0.323937283	-0.410624459
ENSG00000137473	TTC29	0.00500967	0.028360099	0.13474836	5.505020776	0.307625643	0.003680647	0.27831847	0.126308417	0.27831847	-0.378159321
ENSG00000114670	NEK11	0.005030662	0.028437908	0.1267962	5.879638327	0.272006811	0.005857417	0.243839539	0.120517405	0.243839539	-0.355671435
ENSG00000083838	ZNF446	0.005051813	0.028527039	0.097869755	5.259929559	0.161819803	0.007040261	0.141723713	0.132620659	0.141723713	-0.274398532
ENSG00000005448	WDR54	0.005068547	0.028591066	0.142401167	6.835838561	0.342619725	0.001567456	0.313372578	0.119900858	0.313372578	-0.39909988
ENSG00000147799	ARHGAP39	0.005093964	0.02870388	0.133169269	6.266236998	0.29969564	0.004093617	0.271334836	0.118672511	0.271334836	-0.373011241
ENSG00000150433	TMEM218	0.005098017	0.028706371	0.102455843	4.825316806	0.155552093	0.012398505	0.128099141	0.150634012	0.150634012	-0.286955683
ENSG00000271254		0.005109641	0.028761636	0.103240356	5.178344268	0.18135923	0.007001468	0.158537316	0.135223026	0.158537316	-0.289077036
ENSG00000203778	FAM229B	0.005161022	0.029011921	0.153674947	7.870646002	0.408212055	0.002281682	0.36449939	0.133792058	0.36449939	-0.429799293
ENSG00000153904	DDAH1	0.005161406	0.029011921	0.09935992	5.998762005	0.167457736	0.003784409	0.149544215	0.119625931	0.149544215	-0.277888213
ENSG00000101751	POLI	0.005196026	0.029154972	0.139433156	3.637391974	0.214283112	0.019753346	0.161947105	0.282195159	0.282195159	-0.38966311
ENSG00000168209	DDIT4	0.005199364	0.029163408	0.193011934	7.439041939	0.660149069	0.000859668	0.577727893	0.126029751	0.577727893	-0.539355518
ENSG00000184613	NELL2	0.00522428	0.029241254	0.223632593	4.091365126	0.882826217	0.022913123	0.753818469	0.21090142	0.753818469	-0.624576593
ENSG00000227799	CDPF1P1	0.005234807	0.029270581	0.272844416	1.565447552	1.355176519	0.177816228	0.978378301	0.78943026	0.978378301	-0.761841093
ENSG00000153207	AHCTF1	0.005235044	0.029270581	0.161044952	5.710596666	0.478353374	0.06049204	0.342313097	0.122487067	0.342313097	-0.449670257
ENSG00000104450	SPAG1	0.005280968	0.029467513	0.091213927	5.600021249	0.121263054	0.004890919	0.105122503	0.124327099	0.124327099	-0.254429959
ENSG00000071189	SNX13	0.005285322	0.029479114	0.116323195	4.212185945	0.144977134	0.012725474	0.103042903	0.197426471	0.197426471	-0.324438109
ENSG00000285920		0.005310613	0.029589031	0.213346694	3.334858397	0.784930674	0.081573958	0.625349845	0.350080486	0.625349845	-0.594717347
ENSG00000126522	ASL	0.005313432	0.029594365	0.088548365	6.507912665	0.111394065	0.003104356	0.096390047	0.118671689	0.118671689	-0.246818919
ENSG00000139116	KIF21A	0.005322976	0.029628842	0.121945723	7.007981383	0.252393676	0.001143433	0.229815048	0.121125485	0.229815048	-0.339839499
ENSG00000284103	DUS4L	0.005334893	0.029661932	0.167731743	3.137213742	0.203855671	0.037719832	0.118702279	0.399229713	0.399229713	-0.46731484
ENSG00000105865	DUS4L	0.005334893	0.029661932	0.167731743	3.137213742	0.203855671	0.037719832	0.118702279	0.399229713	0.399229713	-0.46731484
ENSG00000105429	MEGF8	0.005338295	0.029670467	0.124070676	4.45543665	0.257937294	0.01516938	0.22390832	0.174817858	0.22390832	-0.345645775
ENSG00000123080	CDKN2C	0.00535162	0.029683279	0.095252276	5.768328207	0.193940631	0.010048329	0.13086481	0.121709226	0.13086481	-0.265284235
ENSG00000163590	PPM1L	0.005350101	0.029683279	0.14602828	3.483766775	0.228705679	0.015756479	0.174071011	0.31543161	0.31543161	-0.40671239
ENSG00000143061	IGSF3	0.005350836	0.029683279	0.105410363	4.625052578	0.194868712	0.010200705	0.155144253	0.162370124	0.162370124	-0.293580224
ENSG00000115661	STK16	0.005371347	0.029760518	0.089485847	6.037764625	0.080459748	0.004961045	0.059054725	0.119407192	0.119407192	-0.249117556
ENSG00000123124	WWP1	0.005389691	0.029851751	0.144409696	3.505787918	0.142789826	0.013423096	0.085671346	0.310463875	0.310463875	-0.401859048
ENSG00000285312	C6orf52	0.005410361	0.029941122	0.241941536	2.765522789	1.032686329	0.062076815	0.847044075	0.511002982	0.847044075	-0.67296724
ENSG00000115364	MRPL19	0.005411477	0.029941122	0.119820462	4.130000325	0.145882082	0.016567417	0.106992608	0.206410958	0.206410958	-0.333275984
ENSG00000116141	MARK1	0.005435118	0.030032236	0.100063875	4.914775523	0.095487378	0.009374585	0.070633132	0.14613437	0.14613437	-0.278182189
ENSG00000145687	SSBP2	0.005443152	0.030043174	0.096610631	5.139225084	0.104499563	0.008374176	0.082232616	0.136586635	0.136586635	-0.268535668
ENSG00000166046	TCP11L2	0.005452248	0.030082932	0.20421142	4.170621565	0.698851383	0.129208294	0.518472203	0.201876464	0.518472203	-0.567508462
ENSG00000196511	TPK1	0.005456565	0.030085868	0.191124527	3.080180435	0.609986908	0.060573322	0.506753893	0.415011742	0.506753893	-0.531090527
ENSG00000283526	PRRT1B	0.005456504	0.030085868	0.362319404	1.779340596	2.221063879	0.168606767	1.870237042	0.757335324	1.870237042	-1.006802511
ENSG00000124333	VAMP7	0.005461703	0.030103753	0.120605979	4.019496653	0.140965679	0.006170392	0.106988825	0.219741163	0.219741163	-0.33509904
ENSG00000156374	PCGF6	0.005480584	0.030186889	0.132819706	3.845701087	0.14217361	0.029775783	0.083241393	0.244208592	0.244208592	-0.368885463
ENSG00000163785	RYK	0.005512548	0.030341922	0.10317457	4.689646443	0.090689065	0.007039634	0.06520214	0.158288251	0.158288251	-0.286355795
ENSG00000183054	RGPD6	0.005526433	0.030386779	0.101840562	4.965019839	0.124395998	0.017322849	0.09127643	0.143757419	0.143757419	-0.282570005
ENSG00000172667	ZMAT3	0.005534608	0.030410693	0.12103415	4.047473502	0.109835981	0.011295923	0.061255189	0.216222528	0.216222528	-0.335766937
ENSG00000173597	SULT1B1	0.005537147	0.030414128	0.259303403	1.690725797	1.252375193	0.051019596	0.993260988	0.771712287	0.993260988	-0.71930796
ENSG00000278817		0.005544339	0.030443115	0.198596019	6.434344363	0.672108063	0.017532704	0.595017722	0.11859105	0.595017722	-0.550821728
ENSG00000007202	BLTP2	0.005550902	0.030468628	0.11783486	4.190820644	0.149764614	0.015959008	0.11278053	0.199690441	0.199690441	-0.326778922
ENSG00000122376	SHLD2	0.005553785	0.030473928	0.106398369	4.615574839	0.167890517	0.012824515	0.137497158	0.162996471	0.162996471	-0.295045339
ENSG00000146918	NCAPG2	0.005587522	0.030630314	0.164048934	3.615788055	0.455687902	0.056806814	0.361165579	0.286643675	0.361165579	-0.454588398
ENSG00000104231	ZFAND1	0.005590203	0.030630314	0.115371936	4.229636997	0.169983299	0.011115546	0.131338214	0.195613323	0.195613323	-0.319683799
ENSG00000108963	DPH1	0.005588572	0.030630314	0.097857926	5.300509609	0.159848176	0.012238013	0.136490003	0.131434814	0.136490003	-0.271163576
ENSG00000140025	EFCAB11	0.005619281	0.030729353	0.114643524	4.34724255	0.181477967	0.01993272	0.13698422	0.184193985	0.184193985	-0.317471724
ENSG00000154928	EPHB1	0.005619667	0.030729353	0.198538295	2.52411666	0.334230015	0.026717593	0.23879372	0.585476795	0.585476795	-0.549789317
ENSG00000126803	HSPA2	0.005647551	0.030849991	0.188488465	4.834596888	0.607800281	0.013947376	0.53783818	0.150149349	0.53783818	-0.521655461
ENSG00000100030	MAPK1	0.005649506	0.03085007	0.107220083	4.88380389	0.214466254	0.003279245	0.175267956	0.147650485	0.175267956	-0.296727237
ENSG00000057019	DCBLD2	0.005657182	0.030870775	0.139512441	3.579358003	0.256535433	0.007964344	0.220189889	0.294327648	0.294327648	-0.386033282
ENSG00000263155	MYZAP	0.005659929	0.030872769	0.199527593	2.856829189	0.805204757	0.110018099	0.50829251	0.482147482	0.50829251	-0.552064644
ENSG00000085719	CPNE3	0.005681702	0.030962061	0.117099981	4.120322829	0.120737756	0.00544884	0.082856729	0.207519192	0.207519192	-0.323852489
ENSG00000149657	LSM14B	0.005687819	0.030984771	0.098991026	4.870838904	0.068141214	0.003894476	0.04510465	0.148297731	0.148297731	-0.273735501
ENSG00000116857	TMEM9	0.005704593	0.031054864	0.105604067	6.083837973	0.190142765	0.00245712	0.170748533	0.119189157	0.170748533	-0.291920804
ENSG00000187676	B3GLCT	0.00571651	0.031098563	0.141157037	3.617542064	0.188249554	0.023181535	0.128134994	0.286279403	0.286279403	-0.390103577
ENSG00000112624	BICRAL	0.00573321	0.031157304	0.108875886	4.510355644	0.171001348	0.013623708	0.131466015	0.170480696	0.170480696	-0.300787273
ENSG00000179163	FUCA1	0.005741044	0.031178557	0.08837338	6.849107312	0.062355131	0.001314358	0.047488673	0.119980865	0.119980865	-0.244106385
ENSG00000160188	RSPH1	0.005748067	0.031206036	0.164257288	8.14710973	0.453299058	0.000566568	0.418468207	0.140440757	0.418468207	-0.453648584
ENSG00000188153	COL4A5	0.005756676	0.031242101	0.154474638	3.405633373	0.378502224	0.037166218	0.288581036	0.33344208	0.33344208	-0.426555207
ENSG00000152409	JMY	0.005782578	0.031361265	0.109702827	4.507021087	0.131465332	0.016176626	0.08299942	0.17073504	0.17073504	-0.302764663
ENSG00000121104	FAM117A	0.005795601	0.031410457	0.132112486	3.745097262	0.169060747	0.009705633	0.126544498	0.261368764	0.261368764	-0.364515127
ENSG00000183172	SMDT1	0.005818611	0.031524418	0.090929079	5.507030465	0.130334038	0.002148603	0.116098776	0.126263617	0.126263617	-0.250767115
ENSG00000134202	GSTM3	0.005881784	0.031833396	0.178057143	4.241096773	0.542370404	0.041973713	0.450428018	0.194439979	0.450428018	-0.490422772
ENSG00000139197	PEX5	0.005891614	0.031865634	0.1503144	3.406902553	0.165330779	0.017769281	0.108017724	0.333145728	0.333145728	-0.41392879
ENSG00000145604	SKP2	0.005902801	0.031904429	0.122250482	4.281026901	0.149433817	0.041658047	0.078386801	0.190456271	0.190456271	-0.336571769
ENSG00000078177	N4BP2	0.005905012	0.031905529	0.128231689	3.922009159	0.20230147	0.022559319	0.138477647	0.232823395	0.232823395	-0.353023106
ENSG00000134243	SORT1	0.005940257	0.03201978	0.128459435	3.805201202	0.08920676	0.005459546	0.051709765	0.250831118	0.250831118	-0.353399747
ENSG00000107077	KDM4C	0.005946058	0.032040183	0.121840511	4.075551973	0.170704011	0.017769089	0.129171633	0.212791031	0.212791031	-0.335151724
ENSG00000187555	USP7	0.005962192	0.032116232	0.113079375	4.317109676	0.203827987	0.011602651	0.175132399	0.186992009	0.186992009	-0.310951712
ENSG00000101004	NINL	0.005985919	0.032233119	0.18987726	2.854134329	0.256715313	0.076953252	0.117766532	0.482993437	0.482993437	-0.521887471
ENSG00000113742	CPEB4	0.005997219	0.032272104	0.14946413	4.116890636	0.386460748	0.010091779	0.336864479	0.207914869	0.336864479	-0.410717473
ENSG00000132388	UBE2G1	0.006007694	0.032317531	0.102150775	4.73643179	0.141452172	0.006543896	0.115561585	0.155519188	0.155519188	-0.28064507
ENSG00000165810	BTNL9	0.006013759	0.032327475	0.250922018	1.5033409	1.10419747	0.139225332	0.838638342	0.797045303	0.838638342	-0.689290372
ENSG00000111837	MAK	0.006015644	0.032327475	0.112576471	5.008089955	0.222065213	0.009524241	0.187307905	0.141803458	0.187307905	-0.3092394
ENSG00000135338	LCA5	0.006018626	0.032332569	0.143921552	5.137611106	0.346522011	0.011236569	0.310464451	0.136644643	0.310464451	-0.395318672
ENSG00000183833	CFAP91	0.006022291	0.032341332	0.117644266	4.441665933	0.232398848	0.019146892	0.195805509	0.175955342	0.195805509	-0.323117648
ENSG00000168389	MFSD2A	0.006031702	0.03238093	0.090902256	5.581351785	0.104908715	0.003649114	0.088579048	0.124687358	0.124687358	-0.249622413
ENSG00000139644	TMBIM6	0.006082895	0.032622707	0.088969793	7.173481523	0.055280621	0.000246987	0.03950723	0.122690953	0.122690953	-0.244068977
ENSG00000122218	COPA	0.006113958	0.032767186	0.090426574	7.307826194	0.088801578	0.002746972	0.069955537	0.124249869	0.124249869	-0.247914062
ENSG00000137821	LRRC49	0.006132998	0.032854753	0.13557362	4.671150448	0.313420101	0.016414855	0.269049017	0.159424997	0.269049017	-0.371550979
ENSG00000116117	PARD3B	0.006134431	0.032854753	0.144268419	3.952709994	0.349794385	0.063512449	0.259741112	0.228561048	0.259741112	-0.395368744
ENSG00000283447	NDUFS1	0.006140814	0.032866796	0.097258688	5.028468558	0.110759213	0.005990893	0.088646371	0.140921212	0.140921212	-0.266504958
ENSG00000023228	NDUFS1	0.006140814	0.032866796	0.097258688	5.028468558	0.110759213	0.005990893	0.088646371	0.140921212	0.140921212	-0.266504958
ENSG00000162694	EXTL2	0.006155402	0.032933782	0.15748416	3.317974539	0.287246371	0.031123316	0.215768699	0.354066261	0.354066261	-0.431409937
ENSG00000234797	RPS3AP6	0.006170214	0.033001926	0.263879136	2.127517981	1.017271704	0.394162884	0.464559146	0.687298154	0.687298154	-0.722658351
ENSG00000147231	RADX	0.006203703	0.033169883	0.216017079	3.020660437	0.7902668	0.117944607	0.606786577	0.432167965	0.606786577	-0.591198943
ENSG00000183421	RIPK4	0.006215667	0.033222678	0.088396443	6.217558986	0.132179665	0.002593919	0.118042573	0.118764622	0.118764622	-0.241868741
ENSG00000175029	CTBP2	0.006222111	0.033237556	0.106415242	4.503448847	0.110177734	0.004867988	0.088632618	0.171008767	0.171008767	-0.291135169
ENSG00000011143	MKS1	0.006229178	0.033261344	0.093081124	5.929912837	0.145057946	0.006462837	0.128099651	0.120097223	0.128099651	-0.254620366
ENSG00000162961	DPY30	0.006237789	0.033284958	0.088314486	6.842448346	0.123862729	0.001193195	0.110695505	0.119940415	0.119940415	-0.241541232
ENSG00000137434	C6orf52	0.006237606	0.033284958	0.226816123	2.732126399	0.884352653	0.065020863	0.733982513	0.521590514	0.733982513	-0.620347146
ENSG00000128536	CDHR3	0.006264469	0.033393698	0.185355822	6.46065403	0.589237149	0.004507385	0.529089435	0.118611741	0.529089435	-0.506690041
ENSG00000180447	GAS1	0.006273321	0.033429672	0.283961065	3.312865866	1.448563294	0.092740668	1.159588118	0.355272194	1.159588118	-0.776106016
ENSG00000188266	HYKK	0.006332982	0.033691123	0.159377273	4.546293722	0.44587891	0.036760776	0.357745169	0.16780932	0.357745169	-0.435103697
ENSG00000024862	CCDC28A	0.006345646	0.033735916	0.088520305	6.121821484	0.084234633	0.002659547	0.065190781	0.119039329	0.119039329	-0.241604206
ENSG00000283201		0.006384583	0.033908899	0.251570171	1.815255453	0.850552661	0.23183423	0.51282548	0.751087779	0.751087779	-0.686119186
ENSG00000100614	PPM1A	0.006389606	0.033924242	0.101238445	5.720256247	0.180789078	0.00456345	0.154617722	0.122348686	0.154617722	-0.276086113
ENSG00000290366		0.006401685	0.033971357	0.251029245	1.659064257	0.954598342	0.202216719	0.634796406	0.77648288	0.77648288	-0.684422314
ENSG00000259030	FPGT-TNNI3K	0.00640591	0.033976758	0.26998633	1.888151537	1.227936569	0.313227792	0.818870985	0.73768413	0.818870985	-0.736049343
ENSG00000112981	NME5	0.006428313	0.034050136	0.149664311	5.597397237	0.378190707	0.00384585	0.344040405	0.124376823	0.344040405	-0.407849358
ENSG00000117650	NEK2	0.006458209	0.034174332	0.165492745	3.83071685	0.456002202	0.026205071	0.39915693	0.2466126	0.39915693	-0.450729753
ENSG00000099139	PCSK5	0.00647713	0.034263046	0.226617147	6.134663435	0.859535237	0.006509504	0.791092624	0.118994321	0.791092624	-0.616986838
ENSG00000135776	ABCB10	0.006480536	0.03426966	0.14236848	3.545077712	0.176197122	0.013044404	0.127472106	0.301751062	0.301751062	-0.387587062
ENSG00000165269	AQP7	0.006507628	0.03440148	0.222139202	3.318201067	0.835245608	0.060162417	0.706229975	0.354012784	0.706229975	-0.604450342
ENSG00000113384	GOLPH3	0.006522182	0.034466958	0.090351806	5.566607095	0.084665837	0.001804225	0.070488896	0.124982692	0.124982692	-0.245784425
ENSG00000140995	DEF8	0.006528922	0.034487842	0.106198287	4.570698441	0.132554773	0.009095088	0.102206976	0.166065258	0.166065258	-0.288855412
ENSG00000196344	ADH7	0.006575742	0.034646333	0.194822447	7.338448933	0.641606566	0.000968346	0.588524798	0.124642211	0.588524798	-0.529449351
ENSG00000127325	BEST3	0.006586554	0.034665911	0.274353738	2.147672491	1.283830652	0.155163476	1.013858114	0.682642336	1.013858114	-0.745434359
ENSG00000237441	RGL2	0.006598184	0.034695577	0.114632699	4.487283737	0.219512671	0.016043455	0.188044702	0.17226387	0.188044702	-0.311396481
ENSG00000108395	TRIM37	0.006627054	0.034824346	0.128978734	3.908792864	0.179119072	0.023666703	0.125927764	0.234700265	0.234700265	-0.350180635
ENSG00000172817	CYP7B1	0.006633506	0.034835219	0.259187522	2.767507828	1.283039861	0.271383561	0.771963863	0.510373389	0.771963863	-0.703617368
ENSG00000164849	GPR146	0.006643832	0.034866121	0.241935291	0.804539975	1.05911808	0.081064664	0.828009294	0.826545571	0.828009294	-0.656658019
ENSG00000065978	YBX1	0.006653966	0.034885039	0.092153217	7.746811137	0.091069863	0.000640358	0.074972062	0.131252649	0.131252649	-0.250074687
ENSG00000128641	MYO1B	0.006687085	0.034982754	0.118309752	4.091774969	0.196854379	0.006538298	0.164527388	0.21085285	0.21085285	-0.320860588
ENSG00000140939	NOL3	0.006688009	0.034982754	0.132402889	3.97513047	0.24945028	0.04673503	0.176746965	0.2255324	0.2255324	-0.359075652
ENSG00000100413	POLR3H	0.006720935	0.035143413	0.096538846	5.266989393	0.107252391	0.012335964	0.080935424	0.132409504	0.132409504	-0.26165544
ENSG00000164039	BDH2	0.006725492	0.03515568	0.120760927	4.06046897	0.178592005	0.011870327	0.137368387	0.21462208	0.21462208	-0.327278955
ENSG00000170899	GSTA4	0.006734898	0.035193274	0.168780021	4.276575867	0.489488406	0.025463632	0.416964611	0.190892417	0.416964611	-0.457339157
ENSG00000133466	C1QTNF6	0.006745428	0.035236712	0.164382123	3.374546016	0.455624241	0.078944053	0.334643567	0.340727896	0.340727896	-0.44533709
ENSG00000113048	MRPS27	0.006750847	0.03525344	0.092483743	5.633086163	0.107592302	0.00911535	0.086697194	0.123725475	0.123725475	-0.250528397
ENSG00000110700	RPS13	0.006774675	0.035319856	0.09763373	8.397723616	0.138280239	0.000314265	0.119055258	0.147733049	0.147733049	-0.264364994
ENSG00000148730	EIF4EBP2	0.006777489	0.035322937	0.08838803	6.868070255	0.093366311	0.001236092	0.076171915	0.120099351	0.120099351	-0.23931803
ENSG00000135205	CCDC146	0.006830734	0.035553811	0.137925431	5.908975852	0.31945785	0.003925505	0.29152822	0.120263977	0.29152822	-0.373086315
ENSG00000177455	CD19	0.006849658	0.035628979	0.270896335	3.665824296	1.264162405	0.065296923	1.074446327	0.276471792	1.074446327	-0.732521706
ENSG00000130751	NPAS1	0.006884392	0.035786231	0.200648389	3.644709702	0.687677265	0.045077562	0.580198965	0.280707576	0.580198965	-0.54222927
ENSG00000154269	ENPP3	0.006894321	0.035814421	0.172457536	4.416488412	0.495297404	0.012736885	0.44918137	0.178076412	0.44918137	-0.465964085
ENSG00000282522	PKD1P1	0.007006237	0.036360152	0.400760646	2.067810758	2.687874046	0.240149149	2.254278472	0.700731178	2.254278472	-1.080670184
ENSG00000141076	UTP4	0.007012746	0.036382054	0.253188971	2.915391892	1.108888741	0.084514212	0.911098281	0.463914103	0.911098281	-0.682657821
ENSG00000154040	CABYR	0.007046748	0.036498095	0.207564709	3.787582419	0.720810512	0.051421117	0.617704719	0.253834125	0.617704719	-0.559309459
ENSG00000085788	DDHD2	0.007060335	0.036521667	0.164542764	3.207778136	0.187069931	0.039784401	0.09942336	0.380708186	0.380708186	-0.443275732
ENSG00000126773	PCNX4	0.007073012	0.036575343	0.115484821	4.234802577	0.162656496	0.012050868	0.128738109	0.195082744	0.195082744	-0.311045311
ENSG00000290947		0.007100804	0.036695182	0.317195287	2.672554992	1.735534983	0.156922556	1.405700475	0.540377892	1.405700475	-0.853914894
ENSG00000277101	ARHGEF26	0.007110663	0.036734191	0.166469125	3.693626037	0.498163148	0.053940398	0.376455541	0.27102719	0.376455541	-0.448071063
ENSG00000100422	CERK	0.00713714	0.036811155	0.140411604	4.005339227	0.361749111	0.020104549	0.286096569	0.221560579	0.286096569	-0.377760109
ENSG00000119401	TRIM32	0.007144843	0.036826986	0.113068465	5.14497248	0.212421564	0.009987687	0.188568656	0.136381217	0.188568656	-0.304156067
ENSG00000168958	MFF	0.007159359	0.036878738	0.095757374	5.141417502	0.112624797	0.005903491	0.087183417	0.136508064	0.136508064	-0.25752408
ENSG00000108602	ALDH3A1	0.007164041	0.036885372	0.215217187	9.038612171	0.787038657	0.000138569	0.719235325	0.172798078	0.719235325	-0.578745093
ENSG00000170846		0.007173198	0.036913292	0.093033417	5.436122708	0.117416475	0.006523832	0.090408846	0.127900756	0.127900756	-0.250138458
ENSG00000283391	EEF1B2	0.007189248	0.036971948	0.087765844	6.613219283	0.130182784	0.000722362	0.1122245	0.118910869	0.118910869	-0.235910068
ENSG00000114942	EEF1B2	0.007189248	0.036971948	0.087765844	6.613219283	0.130182784	0.000722362	0.1122245	0.118910869	0.118910869	-0.235910068
ENSG00000122420	PTGFR	0.007201554	0.036999322	0.258328799	4.707901818	1.165215921	0.025705354	1.010740022	0.157190118	1.010740022	-0.694226969
ENSG00000182220	ATP6AP2	0.007217483	0.037057207	0.088188016	6.536201949	0.11693955	0.00206532	0.080823477	0.118721601	0.118721601	-0.236929394
ENSG00000176714	CCDC121	0.007215368	0.037057207	0.145809805	3.78026332	0.357175653	0.027398263	0.302799577	0.255102868	0.302799577	-0.391752638
ENSG00000148229	POLE3	0.007222748	0.037072264	0.089508265	5.883194913	0.067899403	0.00394514	0.05052767	0.120485419	0.120485419	-0.240454625
ENSG00000182774	RPS17	0.007234655	0.037121395	0.102276968	8.798163803	0.178264917	0.000254126	0.158478201	0.162209619	0.162209619	-0.274700125
ENSG00000112186	CAP2	0.007307536	0.037447002	0.246023666	3.479832536	1.011941803	0.021244422	0.918813341	0.316324902	0.918813341	-0.659957118
ENSG00000065833	ME1	0.007319007	0.037469545	0.107928935	5.59742953	0.193635274	0.005051565	0.175864257	0.124376209	0.175864257	-0.289462141
ENSG00000173208	ABCD2	0.007322312	0.037474397	0.251219836	3.486198603	1.051132447	0.05339635	0.926789947	0.314880295	0.926789947	-0.673726064
ENSG00000090447	TFAP4	0.007340627	0.037543956	0.151630835	3.483616538	0.240750847	0.041622776	0.165171129	0.315465691	0.315465691	-0.406519671
ENSG00000276975	HYDIN2	0.00734039	0.037543956	0.305309882	1.57351036	1.70883302	0.301391748	1.146321316	0.788384174	1.146321316	-0.818533866
ENSG00000224877	NDUFAF8	0.007391504	0.037731323	0.112721633	5.178825562	0.213240514	0.006639362	0.190700724	0.135206743	0.190700724	-0.301944141
ENSG00000137266	SLC22A23	0.007406612	0.03779631	0.115000608	5.071993561	0.219296204	0.01009978	0.195300505	0.139128618	0.195300505	-0.307970119
ENSG00000144711	IQSEC1	0.007438098	0.037908304	0.113373826	6.362965005	0.229633892	0.002221402	0.19740886	0.11858053	0.19740886	-0.303452497
ENSG00000280858	RPL7A	0.007461843	0.037980612	0.0966828	8.308977604	0.13031871	0.000172124	0.11438799	0.14500534	0.14500534	-0.25867459
ENSG00000148303	RPL7A	0.007461843	0.037980612	0.0966828	8.308977604	0.13031871	0.000172124	0.11438799	0.14500534	0.14500534	-0.25867459
ENSG00000250565	ATP6V1E2	0.007468863	0.038004177	0.152373472	3.505290705	0.269401405	0.050019421	0.184144581	0.310575411	0.310575411	-0.407626811
ENSG00000163053	SLC16A14	0.007496754	0.038112664	0.202621433	3.032811062	0.703183729	0.056986853	0.58064725	0.428613251	0.58064725	-0.541796037
ENSG00000182827	ACBD3	0.007497377	0.038112664	0.117745253	6.877016618	0.239702402	0.012669326	0.202652268	0.120156946	0.202652268	-0.314839578
ENSG00000291119	DPY19L2P4	0.007504019	0.038134236	0.233904898	1.955305586	0.92558064	0.12522142	0.669102421	0.724505547	0.724505547	-0.625369919
ENSG00000262826	INTS3	0.007527471	0.03824119	0.121892895	5.105515099	0.24747376	0.021883	0.208875417	0.13782836	0.208875417	-0.325766182
ENSG00000198791	CNOT7	0.007539179	0.0382762	0.114858847	4.374789922	0.134852414	0.023184986	0.09293077	0.181709218	0.181709218	-0.306907369
ENSG00000116791	CRYZ	0.007565598	0.038385813	0.110948677	4.502437885	0.174187619	0.02009466	0.140003826	0.171086469	0.171086469	-0.296328978
ENSG00000088854	DNAAF9	0.00757979	0.038445546	0.103531764	4.70480848	0.122830908	0.00910004	0.099428225	0.157374568	0.157374568	-0.276454267
ENSG00000143416	SELENBP1	0.00763721	0.03867751	0.108225653	7.824561329	0.196543436	0.000736452	0.181175485	0.132816474	0.181175485	-0.288713725
ENSG00000222046	DCDC2B	0.007653569	0.038733247	0.188385587	6.146288443	0.595721823	0.005684077	0.545499303	0.118955906	0.545499303	-0.502421038
ENSG00000145545	SRD5A1	0.007661506	0.038736419	0.134592076	3.796803731	0.220665631	0.029092016	0.166132869	0.252253342	0.252253342	-0.358907803
ENSG00000117643	MAN1C1	0.007661119	0.038736419	0.12966886	5.331846881	0.303092763	0.015947063	0.245192187	0.130563008	0.245192187	-0.345781591
ENSG00000141219	C17orf80	0.007676705	0.038800921	0.111674992	4.444538046	0.110296841	0.01797566	0.073896328	0.175716763	0.175716763	-0.297721932
ENSG00000162714	ZNF496	0.007688838	0.038849896	0.095001806	5.332222207	0.122750784	0.009620255	0.094360735	0.130552785	0.130552785	-0.25322131
ENSG00000149084	HSD17B12	0.007695834	0.038872888	0.106135408	4.51668376	0.129549044	0.004951888	0.093619405	0.170001098	0.170001098	-0.282864764
ENSG00000236609	ZNF853	0.007718409	0.038935249	0.183982709	5.140139414	0.565820115	0.026520773	0.499199576	0.136553836	0.499199576	-0.490156774
ENSG00000275618	BFAR	0.007739317	0.039005766	0.151000492	3.448494538	0.23298447	0.030629056	0.149991407	0.323496682	0.323496682	-0.402149908
ENSG00000125107	CNOT1	0.007846175	0.039481733	0.091594074	5.614803771	0.095865002	0.00624487	0.073811646	0.124052462	0.124052462	-0.243513701
ENSG00000107186	MPDZ	0.007852104	0.039496756	0.223056465	4.617657646	0.837498264	0.038152209	0.734582465	0.162858195	0.734582465	-0.592965267
ENSG00000278229	RPS17	0.007865046	0.039525829	0.164945324	3.682909825	0.340377861	0.149445071	0.117105073	0.273107537	0.273107537	-0.438393159
ENSG00000163291	PAQR3	0.007867371	0.039525829	0.163013682	3.245446822	0.275396656	0.041398243	0.18109529	0.371315455	0.371315455	-0.43324299
ENSG00000135049	AGTPBP1	0.00791568	0.039724569	0.19894704	4.62234348	0.731712769	0.021067314	0.593650409	0.162548409	0.593650409	-0.528332792
ENSG00000089091	DZANK1	0.007927497	0.039746539	0.142654269	5.362955446	0.338081134	0.016912806	0.299147763	0.129732429	0.299147763	-0.378767377
ENSG00000154767	XPC	0.007928804	0.039746539	0.119863588	4.047619345	0.10976415	0.006934466	0.081864184	0.216204449	0.216204449	-0.318248209
ENSG00000106479	ZNF862	0.007933764	0.039758863	0.21475658	2.229614799	0.341569513	0.053186824	0.208365695	0.66311116	0.66311116	-0.570152022
ENSG00000065809	FAM107B	0.007963366	0.039856949	0.096071333	5.701423476	0.154684718	0.001043558	0.142303375	0.122621647	0.142303375	-0.254936725
ENSG00000075239	ACAT1	0.008009708	0.040063662	0.10344944	5.797978643	0.178201955	0.010325992	0.155883973	0.121353925	0.155883973	-0.274312774
ENSG00000100504	PYGL	0.008018752	0.040083372	0.166798531	6.282822216	0.529006157	0.006069409	0.426031534	0.11864806	0.426031534	-0.44222948
ENSG00000174206	KICS2	0.008016348	0.040083372	0.131307998	3.979760873	0.223605661	0.042867512	0.14955624	0.224915566	0.224915566	-0.348147462
ENSG00000187151	ANGPTL5	0.008092326	0.040387949	0.252059937	1.476417031	1.121275084	0.179483048	0.807269862	0.800100852	0.807269862	-0.667503411
ENSG00000162368	CMPK1	0.008133542	0.040568178	0.087714392	6.473444082	0.095410196	0.000867931	0.083968549	0.118625074	0.118625074	-0.232133982
ENSG00000136918	WDR38	0.008138098	0.040578172	0.232827255	7.158448684	0.919356009	0.003888051	0.838027258	0.122532742	0.838027258	-0.616127501
ENSG00000085382	HACE1	0.008143221	0.040583583	0.159143915	3.454153614	0.337245	0.071156917	0.224736921	0.322194615	0.322194615	-0.421106437
ENSG00000168385	SEPTIN2	0.00814429	0.040583583	0.091524248	5.411593941	0.052086751	0.001601628	0.035152349	0.128497117	0.128497117	-0.24217579
ENSG00000229320	KRT8P12	0.008188267	0.040751624	0.126671916	3.969595688	0.200258061	0.02293412	0.157401374	0.226273575	0.226273575	-0.334946713
ENSG00000124374	PAIP2B	0.00819796	0.040774336	0.110051738	5.172482384	0.202672244	0.007617194	0.180485313	0.135422292	0.180485313	-0.290955457
ENSG00000128915	ICE2	0.008203377	0.040775761	0.14421403	3.570857794	0.169361596	0.026858183	0.106166981	0.29615169	0.29615169	-0.381241686
ENSG00000187735	TCEA1	0.008229512	0.040867328	0.101554895	4.782515362	0.063430447	0.007248677	0.036473042	0.152929186	0.152929186	-0.268359374
ENSG00000115758	ODC1	0.008236911	0.040891301	0.091473202	6.232082676	0.138696003	0.00265546	0.127298205	0.118734082	0.127298205	-0.241690602
ENSG00000175390	EIF3F	0.008247636	0.040931759	0.095680441	8.161954503	0.088586075	0.001344864	0.073955669	0.140837951	0.140837951	-0.252764807
ENSG00000123095	BHLHE41	0.008259462	0.040977656	0.19885496	2.490245551	0.433100462	0.018976923	0.329918327	0.595171902	0.595171902	-0.525230656
ENSG00000278183	ABCC1	0.008290033	0.041113265	0.148937303	3.456088921	0.337875624	0.022764687	0.289193946	0.321750001	0.321750001	-0.39319795
ENSG00000025796	SEC63	0.008291968	0.041113265	0.098401159	4.93275869	0.060846465	0.005111417	0.034683231	0.145272434	0.145272434	-0.259773568
ENSG00000077063	CTTNBP2	0.008297138	0.041126072	0.245786769	1.227308412	0.662523104	0.117087361	0.465727927	0.821160904	0.821160904	-0.648811427
ENSG00000111860	CEP85L	0.008305028	0.041152346	0.206036163	2.556506972	0.446991089	0.083352491	0.291050806	0.575954496	0.575954496	-0.54381407
ENSG00000120837	NFYB	0.008310955	0.041168881	0.106250907	4.705713154	0.099587222	0.018013413	0.057685984	0.157320556	0.157320556	-0.280414096
ENSG00000171408	PDE7B	0.008335501	0.041277609	0.141915865	3.801879558	0.340900796	0.038386116	0.274410946	0.251391698	0.274410946	-0.374398046
ENSG00000176171	BNIP3	0.008356744	0.041362555	0.105901031	5.39535516	0.19996298	0.005271219	0.168909929	0.12890144	0.168909929	-0.279293411
ENSG00000092621	PHGDH	0.008357859	0.041362555	0.157832407	5.055520628	0.412277988	0.009894107	0.377000906	0.139792778	0.377000906	-0.416245193
ENSG00000008277	ADAM22	0.008375743	0.04143816	0.251706943	1.425837149	0.870339712	0.178556196	0.607871134	0.805434884	0.805434884	-0.6636343
ENSG00000175395	ZNF25	0.008381385	0.041440277	0.158616467	3.358260963	0.214092466	0.046187684	0.13256026	0.344560809	0.344560809	-0.418161712
ENSG00000188039	NWD1	0.008411161	0.041561648	0.201900411	7.130354533	0.677237491	0.008991447	0.624112727	0.122245717	0.624112727	-0.532028494
ENSG00000114455	HHLA2	0.008438114	0.041681869	0.185658181	4.76958032	0.57319601	0.010550534	0.524788552	0.153643188	0.524788552	-0.4890269
ENSG00000271943		0.008453691	0.041719921	0.214012684	2.840997806	0.788410596	0.135638814	0.575705388	0.487124094	0.575705388	-0.563579125
ENSG00000239779	WBP1	0.00845711	0.041723843	0.093306778	6.333148612	0.149043189	0.002480255	0.132735457	0.118595854	0.132735457	-0.245700437
ENSG00000124006	OBSL1	0.008460867	0.041729426	0.119283159	4.914446449	0.239208921	0.010915386	0.210067699	0.146150264	0.210067699	-0.31408485
ENSG00000110315	RNF141	0.008474922	0.041750288	0.094949841	5.245243168	0.176320083	0.006530424	0.133489311	0.13306674	0.133489311	-0.249959185
ENSG00000112282	MED23	0.008473293	0.041750288	0.100157508	4.95877502	0.13295927	0.011752436	0.102036696	0.144047684	0.144047684	-0.263675114
ENSG00000115993	TRAK2	0.008473734	0.041750288	0.125143769	3.887833915	0.15954491	0.005483859	0.131592478	0.237747313	0.237747313	-0.329451851
ENSG00000007174	DNAH9	0.008502251	0.041855616	0.173950545	6.065016139	0.501245802	0.007970597	0.461980162	0.119273203	0.461980162	-0.457741372
ENSG00000142046	TMEM91	0.008509747	0.041878641	0.159843331	4.498392766	0.440668576	0.021489246	0.375327337	0.171398426	0.375327337	-0.420571142
ENSG00000095596	CYP26A1	0.008515171	0.041880309	0.305475075	3.339431488	1.586167287	0.065329359	1.383950742	0.349001196	1.383950742	-0.80368337
ENSG00000271793		0.008587311	0.042195951	0.14765494	6.569777085	0.409291381	0.002381784	0.33622584	0.118794498	0.33622584	-0.38804619
ENSG00000119471	HSDL2	0.008593294	0.042212299	0.112361011	4.277656836	0.197045358	0.00529312	0.139736921	0.190786315	0.190786315	-0.295264973
ENSG00000013392	RWDD2A	0.008628894	0.042321783	0.118065875	4.233216483	0.129192284	0.021250476	0.088292996	0.195245363	0.195245363	-0.310090266
ENSG00000104687	GSR	0.008655061	0.042423942	0.0925057	6.023927156	0.147293587	0.001524075	0.131379835	0.119481054	0.131379835	-0.242863235
ENSG00000164830	OXR1	0.008673708	0.042489139	0.097248953	5.055658557	0.127947085	0.007095552	0.106808895	0.139787146	0.139787146	-0.255244847
ENSG00000196872	CRACDL	0.008676689	0.042490649	0.124012082	5.289350153	0.258548942	0.005195808	0.233656128	0.131754304	0.233656128	-0.325474285
ENSG00000075223	SEMA3C	0.008691198	0.042548596	0.134689461	3.674703682	0.149539496	0.007036457	0.109223757	0.274716187	0.274716187	-0.353420818
ENSG00000121671	CRY2	0.008697234	0.042565034	0.123508044	3.913315285	0.142689506	0.002859147	0.112436804	0.234055143	0.234055143	-0.324051935
ENSG00000181350	LRRC75A	0.008729634	0.042697313	0.117257378	6.600356493	0.261138628	0.001794913	0.211746015	0.118873816	0.211746015	-0.307503319
ENSG00000171295	ZNF440	0.00874272	0.042748161	0.113349829	4.454313292	0.22221779	0.005296997	0.194248766	0.174909975	0.194248766	-0.297198053
ENSG00000149050	ZNF214	0.008755353	0.042796767	0.19464266	4.022482451	0.627370469	0.043897074	0.544508571	0.219360812	0.544508571	-0.510248333
ENSG00000150768	DLAT	0.008784055	0.042923866	0.090959677	5.772831309	0.113980565	0.006845262	0.09806043	0.121653395	0.121653395	-0.238345841
ENSG00000166825	ANPEP	0.008790822	0.042943734	0.212758375	5.562894554	0.825846356	0.007359619	0.695670772	0.125058583	0.695670772	-0.557444722
ENSG00000262145	ATP23	0.008809742	0.043022934	0.316615312	1.762752277	1.734526507	0.166702187	1.39021172	0.760139894	1.39021172	-0.82932643
ENSG00000182923	CEP63	0.008855926	0.043208654	0.0967569	5.883443886	0.168430406	0.008361393	0.137038693	0.120483193	0.137038693	-0.253267611
ENSG00000171160	MORN4	0.008867071	0.04320998	0.206520746	5.139987234	0.702995551	0.05457434	0.607837582	0.136559292	0.607837582	-0.540493117
ENSG00000157152	SYN2	0.008861575	0.04320998	0.281796134	2.258812652	1.479924739	0.193040673	1.04026529	0.655927792	1.04026529	-0.737558761
ENSG00000167380	ZNF226	0.008864752	0.04320998	0.104113787	4.730708821	0.164002887	0.012501533	0.130442649	0.155850072	0.155850072	-0.272489352
ENSG00000187079	TEAD1	0.008874587	0.043220108	0.107346098	4.49130729	0.122594174	0.007018209	0.10094981	0.171948929	0.171948929	-0.280908414
ENSG00000164118	CEP44	0.008881247	0.043226058	0.125360291	3.975891483	0.171832838	0.018642749	0.127464689	0.22543082	0.22543082	-0.328016713
ENSG00000144028	SNRNP200	0.00892027	0.04337848	0.088929563	7.059947949	0.060653496	0.001251258	0.047846537	0.121575528	0.121575528	-0.232559236
ENSG00000147576	ADHFE1	0.008920751	0.04337848	0.154447219	4.071285416	0.395310657	0.04333529	0.327141458	0.213306122	0.327141458	-0.403891274
ENSG00000176029	C11orf16	0.008960542	0.043545329	0.15451012	5.486748948	0.404782479	0.004283722	0.36649485	0.12671976	0.36649485	-0.403820839
ENSG00000178075	GRAMD1C	0.008970833	0.043582018	0.115354934	4.317275208	0.171652583	0.019691538	0.128876796	0.186976405	0.186976405	-0.301441322
ENSG00000112333	NR2E1	0.008991377	0.04366848	0.301842025	2.649888958	1.643355766	0.067344853	1.347667337	0.547460692	1.347667337	-0.788526618
ENSG00000163931	TKT	0.009061391	0.04397985	0.122764102	7.361937421	0.267408134	0.001681631	0.232387182	0.124952595	0.232387182	-0.320381065
ENSG00000011478	QPCTL	0.009074138	0.0440032	0.113485428	4.476100303	0.167167472	0.026875237	0.125889593	0.173148238	0.173148238	-0.296111658
ENSG00000145725	PPIP5K2	0.009102196	0.04408547	0.131621856	3.827024501	0.188122739	0.021851363	0.137435774	0.247213378	0.247213378	-0.343295032
ENSG00000172845	SP3	0.009124744	0.044173633	0.113607487	5.674994683	0.220048938	0.004374869	0.196079106	0.123027008	0.196079106	-0.296213884
ENSG00000174953	DHX36	0.009166435	0.04432907	0.140370549	3.739203628	0.336792378	0.029127073	0.276895009	0.262445881	0.276895009	-0.365775275
ENSG00000183340	JRKL	0.009165923	0.04432907	0.14253109	3.578518475	0.205497737	0.021007687	0.149947116	0.294507294	0.294507294	-0.371407907
ENSG00000154678	PDE1C	0.009204315	0.044471667	0.242598203	0.74239434	0.929055895	0.089918942	0.743335395	0.824143634	0.824143634	-0.631815648
ENSG00000164180	TMEM161B	0.009230842	0.044572743	0.121874027	4.094998671	0.149699908	0.020215463	0.108583314	0.210471521	0.210471521	-0.317284926
ENSG00000100211	CBY1	0.009236671	0.044587344	0.107844398	5.714905569	0.192070738	0.002932441	0.177700084	0.122424919	0.177700084	-0.280737074
ENSG00000139445	FOXN4	0.009256382	0.044655369	0.221488203	4.070250156	0.82748967	0.046011593	0.715895414	0.213431445	0.715895414	-0.576409097
ENSG00000157856	DRC1	0.009281495	0.044762939	0.138663519	6.103269816	0.319954733	0.001235715	0.297388626	0.119109304	0.297388626	-0.360734228
ENSG00000163138	PACRGL	0.009286867	0.044775263	0.110975153	4.450713811	0.150712157	0.016066313	0.115904343	0.175206073	0.175206073	-0.288680702
ENSG00000215845	TSTD1	0.009299365	0.044821925	0.110210156	6.603481427	0.202981897	0.002131205	0.186513232	0.118882617	0.186513232	-0.286639861
ENSG00000171757	LRRC34	0.009307447	0.044847279	0.15269609	4.993354467	0.395063261	0.019190236	0.342933174	0.142459269	0.342933174	-0.397093809
ENSG00000141665	FBXO15	0.009355338	0.04505073	0.178950449	5.3278559	0.530743964	0.010563594	0.486791254	0.130672022	0.486791254	-0.465054377
ENSG00000188707	ZBED10P	0.009368174	0.04509888	0.155563115	3.34052724	0.395577948	0.027106926	0.33244475	0.348742624	0.348742624	-0.404202413
ENSG00000198909	MAP3K3	0.009382285	0.045153135	0.133524671	4.727828999	0.333814524	0.011680634	0.265219906	0.156017377	0.265219906	-0.346870523
ENSG00000170959	DCDC1	0.009391314	0.045182906	0.149094427	4.433739425	0.367700664	0.030279788	0.314962185	0.176617348	0.314962185	-0.387268402
ENSG00000110066	KMT5B	0.009409769	0.045245157	0.092733866	5.481349632	0.103655374	0.006717589	0.07740756	0.126842746	0.126842746	-0.240810966
ENSG00000196236	XPNPEP3	0.0094439	0.045367253	0.114325528	4.373223963	0.176650149	0.02114724	0.141349723	0.18184863	0.18184863	-0.296737898
ENSG00000148655	LRMDA	0.009457591	0.045405577	0.178137747	3.431547282	0.535488587	0.046386465	0.446461176	0.327412466	0.446461176	-0.462277171
ENSG00000203791	EEF1AKMT2	0.009500852	0.045599498	0.112578769	4.432303892	0.11268445	0.020102381	0.06653513	0.176737804	0.176737804	-0.291971418
ENSG00000141642	ELAC1	0.009504745	0.045604417	0.115651896	4.333050437	0.13317485	0.02223214	0.091479767	0.185501238	0.185501238	-0.299925231
ENSG00000290931		0.009513655	0.04563339	0.148236419	3.512944329	0.328087659	0.032417901	0.266262994	0.30886191	0.30886191	-0.384380368
ENSG00000101052	IFT52	0.009544454	0.045748288	0.104908687	4.585171892	0.126575721	0.00587568	0.102428354	0.165056437	0.165056437	-0.271913948
ENSG00000185290	NUPR2	0.009546505	0.045748288	0.246525166	2.607602867	1.062507553	0.129609729	0.814284412	0.560523795	0.814284412	-0.638952991
ENSG00000172456	FGGY	0.009545385	0.045748288	0.150050061	5.59481767	0.372232025	0.01496621	0.334715664	0.124425993	0.334715664	-0.388911323
ENSG00000086232	EIF2AK1	0.009563687	0.04580427	0.096490217	5.039317854	0.071069737	0.004136776	0.051190209	0.140462905	0.140462905	-0.250027192
ENSG00000172301	COPRS	0.009616216	0.045972744	0.092317707	6.427694806	0.141797092	0.002354878	0.130009397	0.118587255	0.130009397	-0.239041248
ENSG00000173418	NAA20	0.009621149	0.045982497	0.088223514	6.696033121	0.100551027	0.001682288	0.086843804	0.119201893	0.119201893	-0.228424443
ENSG00000284548	METTL9	0.009626792	0.045995639	0.549407335	1.88184405	5.209250423	0.663478823	4.024543554	0.73888152	4.024543554	-1.422390378
ENSG00000170571	EMB	0.009722289	0.046396128	0.091433777	5.444039202	0.15135637	0.002129868	0.124965884	0.127711801	0.127711801	-0.236406889
ENSG00000150456	EEF1AKMT1	0.009759461	0.046559541	0.142337936	4.198609108	0.337145077	0.042231861	0.272428545	0.198859448	0.272428545	-0.367835009
ENSG00000153347	FAM81B	0.009762839	0.046561683	0.171604721	6.375553283	0.488450899	0.00367416	0.45368695	0.118577548	0.45368695	-0.443446846
ENSG00000138032	PPM1B	0.009794589	0.046685091	0.093603071	5.325031692	0.143406869	0.005326307	0.122408815	0.130749513	0.130749513	-0.241776546
ENSG00000164934	DCAF13	0.009845652	0.046886303	0.091790437	5.562188377	0.08177837	0.005783516	0.06237786	0.125073089	0.125073089	-0.236929801
ENSG00000169093	ASMTL	0.0098699	0.04697363	0.093157786	5.343257379	0.147594149	0.004529768	0.128964412	0.130254463	0.130254463	-0.240380093
ENSG00000115590	IL1R2	0.009890186	0.047042012	0.487850586	4.146175672	4.3056655	0.078488655	3.61787279	0.204582834	3.61787279	-1.258481434
ENSG00000120686	UFM1	0.009933742	0.047200955	0.104992018	4.540716843	0.102233264	0.002988112	0.079883121	0.168215664	0.168215664	-0.270682781
ENSG00000161533	ACOX1	0.009940865	0.047212426	0.129860235	3.87226161	0.213981398	0.021827132	0.142085088	0.240083508	0.240083508	-0.334764042
ENSG00000197442	MAP3K5	0.009976647	0.047368216	0.141825026	5.379910804	0.345887566	0.031800732	0.280596024	0.129293405	0.280596024	-0.365431703
ENSG00000260007		0.009997546	0.047453267	0.198791755	6.5893728	0.666982314	0.186259094	0.427499384	0.118843906	0.427499384	-0.512070498
ENSG00000138757	G3BP2	0.010033488	0.047609647	0.093099175	5.526155442	0.087594253	0.008773208	0.065517354	0.125841475	0.125841475	-0.239699938
ENSG00000136478	TEX2	0.01004112	0.047631644	0.116767583	4.243703445	0.153220984	0.017585711	0.119453227	0.194174982	0.194174982	-0.300607637
ENSG00000198208	RPS6KL1	0.010106577	0.047902994	0.173283171	3.829096558	0.501538144	0.060084325	0.406267354	0.246875829	0.406267354	-0.445712279
ENSG00000162620	LRRIQ3	0.010107363	0.047902994	0.157326228	3.762495019	0.40794328	0.057321392	0.327096003	0.258234014	0.327096003	-0.404664212
ENSG00000157869	RAB28	0.010128125	0.047972789	0.099618621	5.01056639	0.097917987	0.012433368	0.067889099	0.141694731	0.141694731	-0.25616171
ENSG00000041982	TNC	0.010179241	0.048154864	0.365021899	3.535902925	2.235351301	0.200303568	1.869068636	0.303767093	1.869068636	-0.937989583
ENSG00000124275	MTRR	0.010275707	0.048527223	0.130777894	3.848987741	0.19267249	0.021936654	0.142364451	0.243688654	0.243688654	-0.335629793
ENSG00000054118	THRAP3	0.010275357	0.048527223	0.088194938	6.302864478	0.080815872	0.002182577	0.068345734	0.118623306	0.118623306	-0.226345477
ENSG00000283589	GOLGA8N	0.010287969	0.048570704	0.303635495	2.645723049	1.515378246	0.460743648	0.971133795	0.548757036	0.971133795	-0.779127793
ENSG00000112874	NUDT12	0.01029937	0.048610092	0.123562462	3.982097727	0.189980419	0.012517729	0.159002738	0.224605378	0.224605378	-0.317013444
ENSG00000174669	SLC29A2	0.010308333	0.048630705	0.133209764	4.429124313	0.293390302	0.02254558	0.253050407	0.17700522	0.253050407	-0.341724486
ENSG00000136868	SLC31A1	0.010317873	0.048643209	0.099925383	6.89503758	0.168705568	0.002593833	0.152484959	0.120276269	0.152484959	-0.256307623
ENSG00000139146	SINHCAF	0.010322886	0.048648859	0.095846521	5.120812427	0.08942893	0.005419898	0.065768018	0.13725694	0.13725694	-0.245829229
ENSG00000120256	LRP11	0.010397221	0.048955635	0.100359834	7.514992631	0.165601777	0.000793158	0.155637056	0.127179462	0.155637056	-0.257155102
ENSG00000120324	PCDHB10	0.01042125	0.049042243	0.308454957	1.251281001	1.611139779	0.182518384	1.295174821	0.819707435	1.295174821	-0.790116357
ENSG00000174652	ZNF266	0.010441188	0.049119007	0.091508179	5.601278742	0.119412515	0.00574969	0.099390875	0.124303375	0.124303375	-0.234340104
ENSG00000110367	DDX6	0.010461631	0.049186064	0.091249588	5.450445552	0.083872982	0.001758977	0.056482118	0.127560099	0.127560099	-0.233615872
ENSG00000003393	ALS2	0.010477672	0.049246916	0.092297017	5.860310597	0.08576016	0.011607458	0.062769975	0.120697494	0.120697494	-0.236248339
ENSG00000072571	HMMR	0.010580423	0.049554037	0.234577377	1.981949681	0.641132521	0.135556766	0.431949991	0.719063175	0.719063175	-0.599640613
ENSG00000141380	SS18	0.010587772	0.049573849	0.109021518	4.399425852	0.054318299	0.005052678	0.030598674	0.179544568	0.179544568	-0.278660935
ENSG00000164808	SPIDR	0.010643245	0.049818911	0.100257624	5.223180961	0.166151538	0.022357016	0.129146155	0.13375473	0.13375473	-0.256077908
ENSG00000172731	LRRC20	0.010672024	0.049924216	0.122131548	4.124432124	0.174801888	0.02461563	0.130760183	0.207047274	0.207047274	-0.311833423
ENSG00000102221	JADE3	0.010695297	0.049988935	0.176402075	3.028096774	0.282750981	0.053300986	0.190017423	0.429989392	0.429989392	-0.450266262
ENSG00000165325	DEUP1	0.010698437	0.049988935	0.179816237	4.051790068	0.531126674	0.074504333	0.427674707	0.215688561	0.427674707	-0.458962522
