# Supplementary material for: Upper Airway Epithelial Tissue Transcriptome Analysis Reveals Immune Signatures Associated with COVID-19 Severity in Ghanaians
Source: J Immunol Res. 2024 Feb 12;2024:6668017. doi: 10.1155/2024/6668017 (PMC10876312; doi:10.1155/2024/6668017)
Supplement: Supplementary 4 — Up COVID-19-severe vs mild Ghanaians. [file 6668017.f4.txt]

target_id	ext_gene	pval	log2fc
ENSG00000163207	IVL	2.20E-06	3.083617609
ENSG00000087128	TMPRSS11E	1.01E-05	2.053893231
ENSG00000105427	CNFN	1.76E-05	1.932693069
ENSG00000143536	CRNN	3.25E-05	3.499305409
ENSG00000137878	GCOM1	5.54E-05	1.810638967
ENSG00000166535	A2ML1	0.000298413	1.594469732
ENSG00000185873	TMPRSS11B	0.000190324	2.435615595
ENSG00000153802	TMPRSS11D	0.000321738	1.173614555
ENSG00000126878	AIF1L	0.000183885	1.428557931
ENSG00000140519	RHCG	0.000342376	2.186536448
ENSG00000163209	SPRR3	0.00017701	2.039641576
ENSG00000172005	MAL	0.000203693	2.406410848
ENSG00000138764	CCNG2	0.000409266	1.199492784
ENSG00000171476	HOPX	0.000434042	1.338587782
ENSG00000172382	PRSS27	0.000464945	1.826452049
ENSG00000263155	MYZAP	0.000500679	1.355339055
ENSG00000188505	NCCRP1	0.000507166	1.949312608
ENSG00000118972	FGF23	0.000539582	1.20874659
ENSG00000152137	HSPB8	0.000904648	1.307006739
ENSG00000133710	SPINK5	0.000635402	1.51899952
ENSG00000186832	KRT16	0.000670605	2.136492844
ENSG00000170423	KRT78	0.000959572	2.153664852
ENSG00000174502	SLC26A9	0.001584137	1.694743973
ENSG00000171401	KRT13	0.001513113	2.049007534
ENSG00000124882	EREG	0.002027416	1.512762611
ENSG00000124466	LYPD3	0.00132071	1.299152373
ENSG00000163216	SPRR2D	0.001557719	2.730746873
ENSG00000215853	RPTN	0.002338428	2.160265706
ENSG00000089685	BIRC5	0.002718878	1.14844955
ENSG00000135476	ESPL1	0.002438512	1.177435679
ENSG00000181333	HEPHL1	0.002825521	1.767834478
ENSG00000136155	SCEL	0.003219163	1.73510664
ENSG00000283997	LDAF1	0.003803238	1.762596156
ENSG00000101115	SALL4	0.003277914	1.170219122
ENSG00000185052	SLC24A3	0.003274757	1.378825763
ENSG00000126233	SLURP1	0.003368724	1.594479467
ENSG00000139354	GAS2L3	0.003712211	1.390188037
ENSG00000134531	EMP1	0.004020277	1.614313847
ENSG00000170477	KRT4	0.003993915	1.048311571
ENSG00000176092	CRYBG2	0.003608436	1.051399686
ENSG00000111058	ACSS3	0.004579453	1.025069074
ENSG00000165091	TMC1	0.005329173	1.067864118
ENSG00000135917	SLC19A3	0.006290527	1.230979654
ENSG00000175356	SCUBE2	0.006256626	1.305974116
ENSG00000169469	SPRR1B	0.005514855	2.060007716
ENSG00000241794	SPRR2A	0.00537239	1.916424758
ENSG00000169474	SPRR1A	0.006356952	1.766647036
ENSG00000143556	S100A7	0.005030396	2.221002075
ENSG00000143369	ECM1	0.006999109	1.840049884
ENSG00000137094	DNAJB5	0.007061033	1.031507431
ENSG00000162545	CAMK2N1	0.007183036	1.603324481
ENSG00000099139	PCSK5	0.008560384	1.215151911
ENSG00000201185	RNA5SP202	0.008241527	2.416921077
ENSG00000203785	SPRR2E	0.008727919	2.482400957
ENSG00000198826	ARHGAP11A	0.010297525	1.589727953
ENSG00000125144	MT1G	0.009660547	1.077397132
ENSG00000186847	KRT14	0.009537837	1.997547582
ENSG00000109321	AREG	0.011385769	1.266248443
ENSG00000134762	DSC3	0.011862765	1.079810843
ENSG00000167261	DPEP2	0.012767052	1.075829751
ENSG00000016602	CLCA4	0.0133406	1.13420737
ENSG00000173281	PPP1R3B	0.014563492	1.130054239
ENSG00000103888	CEMIP	0.015112645	1.027788894
ENSG00000157152	SYN2	0.015465062	1.241718181
ENSG00000251493	FOXD1	0.015548027	1.199793687
ENSG00000186806	VSIG10L	0.015571597	1.095424419
ENSG00000115008	IL1A	0.015398261	1.953597719
ENSG00000006377	DLX6	0.018874618	1.124496804
ENSG00000170837	GPR27	0.018999534	1.422372423
ENSG00000149294	NCAM1	0.019395443	1.172970352
ENSG00000119938	PPP1R3C	0.01992986	1.1380438
ENSG00000125780	TGM3	0.020887262	1.572527681
ENSG00000173210	ABLIM3	0.021206541	1.129070923
ENSG00000214711	CAPN14	0.022064983	1.293944835
ENSG00000110944	IL23A	0.022097689	1.162686209
ENSG00000244094	SPRR2F	0.022351889	2.112801544
ENSG00000167759	KLK13	0.022599573	1.24893874
ENSG00000187054	TMPRSS11A	0.022725848	1.392016073
ENSG00000227506	MUC21	0.025229988	1.619549726
ENSG00000151917	BEND6	0.025550987	1.061756621
ENSG00000147257	GPC3	0.02836147	1.217465846
ENSG00000062282	DGAT2	0.030460289	1.214696154
ENSG00000204618	RNF39	0.035397465	1.393751318
ENSG00000204936	CD177	0.035769632	1.362563137
ENSG00000241506	PSMC1P1	0.039933909	1.766155377
ENSG00000167916	KRT24	0.043599489	1.465918384
ENSG00000251705	RNA5-8SP6	0.04381302	1.551685751
