# Supplementary material for: Upper Airway Epithelial Tissue Transcriptome Analysis Reveals Immune Signatures Associated with COVID-19 Severity in Ghanaians
Source: J Immunol Res. 2024 Feb 12;2024:6668017. doi: 10.1155/2024/6668017 (PMC10876312; doi:10.1155/2024/6668017)
Supplement: Supplementary 5 — Down COVID-19-severe vs mild Ghanaians. [file 6668017.f5.txt]

target_id	ext_gene	pval	log2fc
ENSG00000189058	APOD	1.17E-06	-2.221311845
ENSG00000283104	SARS2	3.90E-06	-1.752930698
ENSG00000142528	ZNF473	9.19E-06	-1.650036655
ENSG00000275099	GGNBP2	1.51E-05	-1.597252209
ENSG00000263163	SLC27A3	3.11E-05	-1.730048495
ENSG00000116157	GPX7	3.37E-05	-1.428328269
ENSG00000093072	ADA2	3.56E-05	-1.901033013
ENSG00000233382	NKAPP1	5.26E-05	-1.437101854
ENSG00000204264	PSMB8	5.07E-05	-1.89803216
ENSG00000185129	PURA	6.65E-05	-1.33297438
ENSG00000167550	RHEBL1	7.06E-05	-1.326425466
ENSG00000114439	BBX	9.26E-05	-1.279241064
ENSG00000184979	USP18	8.96E-05	-2.246325603
ENSG00000213689	TREX1	9.34E-05	-1.840024291
ENSG00000185272	RBM11	0.000116865	-1.432695817
ENSG00000263290	SCAMP3	0.000223551	-1.416682225
ENSG00000273607	CHCHD10	0.0003412	-1.480038661
ENSG00000283060	ID3	0.00024797	-1.338376499
ENSG00000285152	RNF31	0.000217044	-1.274274403
ENSG00000128394	APOBEC3F	0.000285971	-1.282451165
ENSG00000112773	TENT5A	0.000170465	-1.823338116
ENSG00000111879	FAM184A	0.000292651	-1.486975533
ENSG00000267318		0.000338163	-1.400977869
ENSG00000126882	FAM78A	0.000285068	-1.517863078
ENSG00000198563	DDX39B	0.000240009	-1.709818451
ENSG00000130813	SHFL	0.000153434	-1.79088275
ENSG00000135093	USP30	0.000323506	-1.408995777
ENSG00000110619	CARS1	0.00016649	-1.33555666
ENSG00000090554	FLT3LG	0.000244091	-1.364013725
ENSG00000169660	HEXD	0.000279567	-1.353008394
ENSG00000117318	ID3	0.00024797	-1.338376499
ENSG00000089737	DDX24	0.000211448	-1.722592107
ENSG00000221829	FANCG	0.000194224	-1.353988237
ENSG00000165949	IFI27	0.000275457	-1.623924808
ENSG00000170906	NDUFA3	0.000286029	-1.218135549
ENSG00000232573	RPL3P4	0.00019773	-4.135835717
ENSG00000166743	ACSM1	0.000263508	-1.599924404
ENSG00000108771	DHX58	0.000320487	-1.659844203
ENSG00000106346	USP42	0.000192043	-1.37607077
ENSG00000134326	CMPK2	0.000244861	-2.11699186
ENSG00000228049	POLR2J2	0.000161452	-1.728645706
ENSG00000105726	ATP13A1	0.000343721	-1.401669161
ENSG00000135407	AVIL	0.00022213	-1.269258889
ENSG00000014914	MTMR11	0.000329595	-1.200188
ENSG00000235439	DDX39B	0.000403195	-1.501308291
ENSG00000124116	WFDC3	0.000415192	-1.452102605
ENSG00000166428	PLD4	0.00042326	-1.730179965
ENSG00000129566	TEP1	0.000391502	-1.266813134
ENSG00000137198	GMPR	0.00036826	-1.648451689
ENSG00000175497	DPP10	0.000382414	-1.612029939
ENSG00000120526	NUDCD1	0.000414933	-1.228344828
ENSG00000136514	RTP4	0.000417969	-1.841803535
ENSG00000181029	TRAPPC5	0.000408098	-1.620406402
ENSG00000165434	PGM2L1	0.000360399	-1.420110448
ENSG00000162614	NEXN	0.000419094	-2.136681226
ENSG00000133328	PLAAT2	0.000446766	-2.203165699
ENSG00000108622	ICAM2	0.000448121	-1.332805671
ENSG00000185495	SEPTIN7P13	0.000449036	-1.35111039
ENSG00000284194	SCO2	0.000462549	-1.723735254
ENSG00000092098	RNF31	0.000470078	-1.3952161
ENSG00000278220	CLN8	0.000659962	-1.475138477
ENSG00000230669	PSMB8	0.001093859	-1.605623166
ENSG00000206298	PSMB8	0.001093859	-1.605623166
ENSG00000236443	PSMB8	0.001093859	-1.605623166
ENSG00000281013	NDUFA6	0.001088049	-1.642693822
ENSG00000235715	PSMB8	0.000987634	-1.459334647
ENSG00000226201	PSMB8	0.001093859	-1.605623166
ENSG00000283738		0.00073545	-1.26988921
ENSG00000186654	PRR5	0.000931664	-1.225017598
ENSG00000183354	KIAA2026	0.000818336	-1.274744422
ENSG00000178026	LRRC75B	0.000824744	-1.139224017
ENSG00000108590	MED31	0.000532458	-1.242328555
ENSG00000239713	APOBEC3G	0.000931563	-1.439915203
ENSG00000124574	ABCC10	0.000970782	-1.093705012
ENSG00000177294	FBXO39	0.000694804	-1.442460891
ENSG00000136147	PHF11	0.001020326	-1.362153356
ENSG00000005810	MYCBP2	0.000514321	-1.641658417
ENSG00000157303	SUSD3	0.000898808	-1.32122337
ENSG00000180628	PCGF5	0.00080171	-1.625097153
ENSG00000152413	HOMER1	0.000969456	-1.145746612
ENSG00000105662	CRTC1	0.000870264	-1.29452513
ENSG00000283782		0.000684546	-1.292698288
ENSG00000034510	TMSB10	0.000885941	-0.823014303
ENSG00000164221	CCDC112	0.000706742	-1.285524776
ENSG00000283709	FAM238C	0.000649769	-1.49784725
ENSG00000073169	SELENOO	0.00073232	-1.313665876
ENSG00000152217	SETBP1	0.000851	-1.316748234
ENSG00000054690	PLEKHH1	0.000604682	-1.1891663
ENSG00000168062	BATF2	0.000966369	-1.95242963
ENSG00000234545	FAM133B	0.000642369	-1.191745091
ENSG00000178935	ZNF552	0.000905003	-1.358670766
ENSG00000161643	SIGLEC16	0.000884002	-1.211032066
ENSG00000164136	IL15	0.000786143	-1.259451918
ENSG00000167065	DUSP18	0.000898905	-1.205067101
ENSG00000167984	NLRC3	0.000716074	-1.403770025
ENSG00000183444	OR7E38P	0.000979537	-1.09127413
ENSG00000137842	TMEM62	0.00075149	-1.163437333
ENSG00000143554	SLC27A3	0.000953099	-1.283088109
ENSG00000059378	PARP12	0.000549659	-1.577421741
ENSG00000235316	DUSP8P5	0.001035022	-1.365199209
ENSG00000250011	HMGB1P3	0.000714888	-1.865603062
ENSG00000267303		0.001098811	-1.368729414
ENSG00000140527	WDR93	0.000561052	-1.350077781
ENSG00000004468	CD38	0.000643798	-1.845688145
ENSG00000136448	NMT1	0.00093421	-1.510088965
ENSG00000157657	ZNF618	0.00105225	-1.075132181
ENSG00000142330	CAPN10	0.000652271	-1.271062443
ENSG00000106404	CLDN15	0.001096737	-1.111406604
ENSG00000259305	ZHX1-C8orf76	0.000725434	-1.353278969
ENSG00000240429	LRRFIP1P1	0.000919293	-1.621184502
ENSG00000197540	GZMM	0.000556912	-1.653446601
ENSG00000175567	UCP2	0.001023908	-1.530284116
ENSG00000165215	CLDN3	0.000897855	-1.767386151
ENSG00000109736	MFSD10	0.000947092	-1.454375841
ENSG00000163016	ALMS1P1	0.001047573	-1.138472319
ENSG00000168016	TRANK1	0.000936032	-1.591567479
ENSG00000229474	PATL2	0.000768096	-1.403311617
ENSG00000196656		0.000539472	-1.204315086
ENSG00000158042	MRPL17	0.000803469	-1.225907987
ENSG00000135437	RDH5	0.000639048	-1.199117958
ENSG00000136816	TOR1B	0.000868951	-1.281872705
ENSG00000111412	SPRING1	0.000931668	-1.173082507
ENSG00000129048	ACKR4	0.000947788	-1.441393043
ENSG00000196116	TDRD7	0.000985576	-1.322392634
ENSG00000121577	POPDC2	0.000570051	-1.250282348
ENSG00000175309	PHYKPL	0.000806945	-1.172961679
ENSG00000106133	NSUN5P2	0.001021833	-1.295565524
ENSG00000169894	MUC3A	0.000564667	-2.136622094
ENSG00000132466	ANKRD17	0.000943009	-1.510912787
ENSG00000198039	ZNF273	0.000820573	-1.252674306
ENSG00000173065	FAM222B	0.000594898	-1.235223685
ENSG00000143753	DEGS1	0.001071053	-1.135326314
ENSG00000153914	SREK1	0.000696322	-1.461380698
ENSG00000257122	RRN3P3	0.00079094	-1.104825505
ENSG00000185716	MOSMO	0.000770224	-1.107525464
ENSG00000131797	CLUHP3	0.000801429	-1.102257091
ENSG00000277791	PSMB3	0.000805993	-1.569169433
ENSG00000164080	RAD54L2	0.000994155	-1.14193352
ENSG00000187741	FANCA	0.000816718	-1.367445829
ENSG00000241641	RPS23P6	0.000825391	-1.42363323
ENSG00000133624	ZNF767P	0.000960874	-1.10662713
ENSG00000114857	NKTR	0.000793395	-1.289188921
ENSG00000055044	NOP58	0.000871206	-1.236850964
ENSG00000187492	CDHR4	0.001044766	-1.624111616
ENSG00000236383	CCDC200	0.000543863	-1.31994842
ENSG00000131401	NAPSB	0.000949244	-1.616012783
ENSG00000184669	OR7E14P	0.000610988	-1.175636851
ENSG00000188177	ZC3H6	0.000670085	-1.695584918
ENSG00000003400	CASP10	0.001068846	-1.10546086
ENSG00000155363	MOV10	0.001037089	-1.683420731
ENSG00000178623	GPR35	0.000768533	-1.290567771
ENSG00000114805	PLCH1	0.001124458	-1.316297111
ENSG00000244563	RPS26P19	0.001130959	-1.431724251
ENSG00000280787	HERC2P2	0.002038889	-1.508063788
ENSG00000274616	CNOT3	0.001612577	-1.482193394
ENSG00000243958	PSMB9	0.002278515	-2.995934698
ENSG00000274636	GLIS2	0.001502279	-2.027456937
ENSG00000206505	HLA-A	0.001584481	-3.190230587
ENSG00000273807		0.001235944	-1.269277121
ENSG00000275214	IFI27	0.001559451	-1.309365381
ENSG00000240508	PSMB9	0.002278515	-2.995934698
ENSG00000231631	PSMB8	0.002067921	-1.363696923
ENSG00000281320	DYRK1B	0.002257399	-1.099893495
ENSG00000083535	PIBF1	0.001361168	-1.093946731
ENSG00000159086	PAXBP1	0.002128857	-1.059967947
ENSG00000075234	TTC38	0.00155371	-1.032430231
ENSG00000166979	EVA1C	0.001556994	-1.388446721
ENSG00000284984	RHOU	0.002045213	-1.240214323
ENSG00000152464	RPP38	0.002107436	-1.178596912
ENSG00000100290	BIK	0.001838207	-1.205214037
ENSG00000241549	GUSBP2	0.001804424	-1.275793006
ENSG00000104044	OCA2	0.001492804	-1.294646207
ENSG00000186481	ANKRD20A5P	0.001943203	-1.503661676
ENSG00000139679	LPAR6	0.001297107	-1.06118266
ENSG00000265787	CYP4F35P	0.001525097	-1.217149664
ENSG00000132109	TRIM21	0.001929093	-1.546567788
ENSG00000189306	RRP7A	0.002087996	-1.01864264
ENSG00000141452	RMC1	0.001919694	-1.098104051
ENSG00000288146	NOC4L	0.00233026	-1.013641293
ENSG00000173141	MRPL57	0.002063961	-1.287666311
ENSG00000157601	MX1	0.001950773	-1.370921489
ENSG00000109606	DHX15	0.001755769	-1.149290586
ENSG00000147649	MTDH	0.001649021	-1.199344443
ENSG00000171853	TRAPPC12	0.001632623	-1.211906744
ENSG00000155313	USP25	0.001714442	-1.086723801
ENSG00000166532	RIMKLB	0.002269744	-1.134900657
ENSG00000244754	N4BP2L2	0.001234831	-1.473511227
ENSG00000165113	GKAP1	0.001802065	-1.030248321
ENSG00000213983	AP1G2	0.002366876	-1.282564545
ENSG00000257529	RPL36A-HNRNPH2	0.001403934	-1.747434164
ENSG00000058729	RIOK2	0.002077132	-1.022077587
ENSG00000196814	MVB12B	0.001764843	-1.044931347
ENSG00000180438	TPRXL	0.001568229	-1.04845655
ENSG00000151882	CCL28	0.002265294	-1.148165692
ENSG00000089048	ESF1	0.001863147	-1.254022721
ENSG00000186854	TRABD2A	0.00221333	-1.146682537
ENSG00000100664	EIF5	0.002337168	-1.279258348
ENSG00000158106	RHPN1	0.001965307	-1.496449304
ENSG00000148399	DPH7	0.002286538	-1.036447935
ENSG00000165359	INTS6L	0.001254087	-1.21432539
ENSG00000125354	SEPTIN6	0.001705631	-1.250872123
ENSG00000144747	TMF1	0.001580694	-1.259047077
ENSG00000143891	GALM	0.001953297	-1.095581987
ENSG00000187808	SOWAHD	0.002262946	-1.35397044
ENSG00000169696	ASPSCR1	0.001745758	-1.223704498
ENSG00000154240	CEP112	0.001975827	-1.032714936
ENSG00000010810	FYN	0.002087322	-1.084231703
ENSG00000028839	TBPL1	0.001922095	-1.098994443
ENSG00000225492	GBP1P1	0.001295272	-1.811852747
ENSG00000165046	LETM2	0.001245174	-1.113837101
ENSG00000128284	APOL3	0.001515665	-1.527763214
ENSG00000157693	TMEM268	0.001415188	-1.164176127
ENSG00000150776	NKAPD1	0.00162347	-1.141807973
ENSG00000161640	SIGLEC11	0.001423521	-1.270229764
ENSG00000184634	MED12	0.001474622	-1.260717538
ENSG00000101017	CD40	0.002298992	-1.305933713
ENSG00000122735	DNAI1	0.002371648	-1.476195459
ENSG00000155761	SPAG17	0.001326086	-1.339458524
ENSG00000105559	PLEKHA4	0.001878271	-1.520601407
ENSG00000104218	CSPP1	0.002158824	-1.552330885
ENSG00000244627	TPTEP2	0.002060797	-1.0525911
ENSG00000196967	ZNF585A	0.001968234	-1.271534945
ENSG00000125826	RBCK1	0.001480693	-1.554760744
ENSG00000126870	DYNC2I1	0.001295361	-1.508939576
ENSG00000176476	SGF29	0.001922122	-1.118897601
ENSG00000148840	PPRC1	0.002299954	-1.025963362
ENSG00000130517	PGPEP1	0.001704756	-1.066322187
ENSG00000124688	MAD2L1BP	0.001564317	-1.202003956
ENSG00000007541	PIGQ	0.00148523	-1.321842406
ENSG00000104518	GSDMD	0.002071214	-1.365841731
ENSG00000169249	ZRSR2	0.001770854	-1.234863832
ENSG00000116574	RHOU	0.002045213	-1.240214323
ENSG00000152778	IFIT5	0.002184785	-1.380196267
ENSG00000179021	C3orf38	0.001851328	-1.077767024
ENSG00000125351	UPF3B	0.002065148	-1.261405786
ENSG00000101935	AMMECR1	0.002269556	-1.079244019
ENSG00000137200	CMTR1	0.001990438	-1.055394345
ENSG00000154099	DNAAF1	0.001477148	-1.604189725
ENSG00000135541	AHI1	0.00170924	-1.375352425
ENSG00000115307	AUP1	0.00180325	-1.335730657
ENSG00000073792	IGF2BP2	0.001497013	-1.035608501
ENSG00000213638	ADAT3	0.002293106	-1.030684973
ENSG00000185475	TMEM179B	0.001357256	-1.317113922
ENSG00000162231	NXF1	0.002034416	-1.138482535
ENSG00000163635	ATXN7	0.002087049	-1.031383654
ENSG00000213402	PTPRCAP	0.001241584	-1.832991881
ENSG00000134285	FKBP11	0.001326136	-1.248503436
ENSG00000069275	NUCKS1	0.001142072	-1.728242454
ENSG00000125450	NUP85	0.001997826	-1.070680245
ENSG00000132424	PNISR	0.001799451	-1.383545979
ENSG00000125454	SLC25A19	0.0018519	-1.031690225
ENSG00000204842	ATXN2	0.002273191	-1.239319824
ENSG00000123353	ORMDL2	0.00210464	-1.222453328
ENSG00000180644	PRF1	0.002230524	-2.252796624
ENSG00000010310	GIPR	0.001502002	-1.261610821
ENSG00000118507	AKAP7	0.001599578	-1.045428103
ENSG00000272617		0.002310808	-1.045735351
ENSG00000156050	FAM161B	0.002257176	-1.353645422
ENSG00000151611	MMAA	0.002280729	-1.174859182
ENSG00000141971	MVB12A	0.001439954	-1.313887646
ENSG00000165632	TAF3	0.001581839	-1.125755597
ENSG00000107796	ACTA2	0.00171116	-1.121295566
ENSG00000274750	H3C6	0.001801798	-1.126129414
ENSG00000153006	SREK1IP1	0.002113542	-1.099206866
ENSG00000163885	CFAP100	0.001995057	-1.444814829
ENSG00000095397	WHRN	0.001306975	-1.354162328
ENSG00000112799	LY86	0.002154179	-1.567932288
ENSG00000197165	SULT1A2	0.002203252	-1.088608319
ENSG00000146858	ZC3HAV1L	0.001490068	-1.113188956
ENSG00000013374	NUB1	0.001406691	-1.374035352
ENSG00000187984	ANKRD19P	0.001934418	-1.178654236
ENSG00000106785	TRIM14	0.001482517	-1.146719418
ENSG00000154305	MIA3	0.002372621	-1.064423946
ENSG00000010295	IFFO1	0.002281373	-1.148485222
ENSG00000278053	DDX52	0.002233227	-1.065584077
ENSG00000224667		0.001730156	-1.401468878
ENSG00000228960	OR2A9P	0.002058059	-1.446544325
ENSG00000168818	STX18	0.001555258	-1.180302047
ENSG00000105556	MIER2	0.001515248	-1.253744238
ENSG00000122257	RBBP6	0.001449847	-1.197999731
ENSG00000185404	SP140L	0.001267049	-1.208620355
ENSG00000226690		0.001517712	-1.297698525
ENSG00000078487	ZCWPW1	0.00201865	-1.207335044
ENSG00000138642	HERC6	0.001716501	-1.579753173
ENSG00000213204		0.002110193	-1.565784519
ENSG00000196517	SLC6A9	0.001563339	-1.299433906
ENSG00000010282	HHATL	0.00224748	-1.204769804
ENSG00000145824	CXCL14	0.002173248	-1.844413307
ENSG00000174720	LARP7	0.001529074	-1.420022556
ENSG00000073605	GSDMB	0.001323539	-1.619967877
ENSG00000169442	CD52	0.002358667	-1.525672983
ENSG00000111335	OAS2	0.002031271	-1.255288157
ENSG00000108679	LGALS3BP	0.001271129	-0.953451796
ENSG00000169136	ATF5	0.002139008	-1.370195346
ENSG00000127415	IDUA	0.002131956	-1.040723768
ENSG00000105204	DYRK1B	0.002257399	-1.099893495
ENSG00000162777	DENND2D	0.001426132	-1.253655292
ENSG00000153975	ZUP1	0.001766013	-1.04538674
ENSG00000114279	FGF12	0.001196545	-1.220124833
ENSG00000170923	OR7G2	0.001161624	-1.438634226
ENSG00000089847	ANKRD24	0.002353819	-1.189720991
ENSG00000164134	NAA15	0.002292651	-1.122933652
ENSG00000126709	IFI6	0.001256133	-2.542714881
ENSG00000187510	PLEKHG7	0.001156762	-1.323814359
ENSG00000112159	MDN1	0.001731449	-1.269334597
ENSG00000137965	IFI44	0.001508667	-1.185790066
ENSG00000204623	ZNRD1ASP	0.00148271	-1.190060433
ENSG00000169047	IRS1	0.002129141	-1.219740136
ENSG00000169246	NPIPB3	0.001191681	-1.268648384
ENSG00000161929	SCIMP	0.001342099	-1.4554047
ENSG00000154511	DIPK1A	0.001950739	-1.084873182
ENSG00000143033	MTF2	0.002245381	-1.014007349
ENSG00000040531	CTNS	0.001157491	-1.145203372
ENSG00000261716	H2BC20P	0.001218145	-1.338029475
ENSG00000273611	ZNHIT3	0.002306117	-1.145139164
ENSG00000149187	CELF1	0.001285645	-1.089201
ENSG00000010219	DYRK4	0.001747263	-1.069472429
ENSG00000163840	DTX3L	0.001186247	-1.497151392
ENSG00000033867	SLC4A7	0.001995297	-1.347264805
ENSG00000167286	CD3D	0.001427405	-1.485027798
ENSG00000174276	ZNHIT2	0.002355655	-1.278818504
ENSG00000197530	MIB2	0.001322432	-1.325814852
ENSG00000114204	SERPINI2	0.002059423	-1.345259644
ENSG00000134256	CD101	0.00214571	-1.414940664
ENSG00000168026	TTC21A	0.001607806	-1.313132096
ENSG00000163794	UCN	0.002197948	-1.39560618
ENSG00000162337	LRP5	0.001910446	-1.138970562
ENSG00000174501	ANKRD36C	0.001643575	-1.195354548
ENSG00000184967	NOC4L	0.00233026	-1.013641293
ENSG00000110057	UNC93B1	0.001735999	-1.512956271
ENSG00000160688	FLAD1	0.002130883	-1.161911201
ENSG00000237854	LINC00674	0.001754562	-1.032252429
ENSG00000254838	GVINP1	0.001546753	-1.253174829
ENSG00000155636	RBM45	0.001201351	-1.237193072
ENSG00000203811	H3C14	0.002294459	-2.03373077
ENSG00000120341	SEC16B	0.002295997	-1.216088461
ENSG00000115866	DARS1	0.00211866	-1.142531112
ENSG00000164008	C1orf50	0.002056247	-1.018089799
ENSG00000173627	APOBEC4	0.001298566	-1.334408366
ENSG00000141027	NCOR1	0.00237981	-1.351112137
ENSG00000143748	NVL	0.00239073	-1.027190431
ENSG00000102359	SRPX2	0.002400723	-1.320002292
ENSG00000101082	SLA2	0.002410542	-1.191391049
ENSG00000273579	C22orf15	0.002646303	-1.341152761
ENSG00000100225	FBXO7	0.002732391	-1.347857656
ENSG00000156239	N6AMT1	0.002561214	-1.12823305
ENSG00000104613	INTS10	0.002711639	-1.097649606
ENSG00000288243	STING1	0.002548149	-1.336870717
ENSG00000273628		0.002604786	-1.079505401
ENSG00000244509	APOBEC3C	0.002703741	-1.236575949
ENSG00000235374	SSR4P1	0.002764054	-1.197252946
ENSG00000173221	GLRX	0.002639153	-1.462322029
ENSG00000164877	MICALL2	0.002576967	-1.207866044
ENSG00000099326	MZF1	0.002747946	-1.23104603
ENSG00000164818	DNAAF5	0.002489561	-1.051328955
ENSG00000100558	PLEK2	0.002559499	-1.230783173
ENSG00000100918	REC8	0.002757514	-1.147939618
ENSG00000149591	TAGLN	0.002673576	-1.156521286
ENSG00000072736	NFATC3	0.002603247	-1.184491206
ENSG00000160606	TLCD1	0.002683923	-1.148718685
ENSG00000136643	RPS6KC1	0.002430217	-1.039326311
ENSG00000169064	ZBBX	0.002514152	-1.290550597
ENSG00000125485	DDX31	0.002622368	-1.000211816
ENSG00000054282	SDCCAG8	0.002751265	-1.047959107
ENSG00000164306	PRIMPOL	0.002521203	-1.098563065
ENSG00000086712	TXLNG	0.002703187	-1.043128416
ENSG00000149131	SERPING1	0.002582877	-2.148023039
ENSG00000043143	JADE2	0.002757691	-1.137713609
ENSG00000198133	TMEM229B	0.002660138	-1.325313371
ENSG00000166750	SLFN5	0.002465475	-1.306540036
ENSG00000156042	CFAP70	0.002624313	-1.408003486
ENSG00000111641	NOP2	0.002508889	-1.022168258
ENSG00000030110	BAK1	0.002495016	-1.370615927
ENSG00000132010	ZNF20	0.002635775	-1.000787267
ENSG00000143344	RGL1	0.00248375	-1.352610645
ENSG00000184584	STING1	0.002562066	-1.34481235
ENSG00000271503	CCL5	0.002676135	-1.60549382
ENSG00000164185	ZNF474	0.002760098	-1.247318611
ENSG00000002549	LAP3	0.002512288	-1.635270029
ENSG00000228300	FAM174C	0.002577328	-1.242700528
ENSG00000185986	SDHAP3	0.002647423	-0.987564777
ENSG00000156983	BRPF1	0.002453678	-1.13504635
ENSG00000168802	CHTF8	0.002661187	-1.172983307
ENSG00000006740	ARHGAP44	0.002688889	-1.049585341
ENSG00000083097	DOP1A	0.002659708	-1.187834401
ENSG00000149932	TMEM219	0.00276817	-1.425959011
ENSG00000038358	EDC4	0.00272903	-1.051651591
ENSG00000205238	SPDYE2	0.002497398	-1.491559709
ENSG00000131591	C1orf159	0.002667499	-1.000014952
ENSG00000149483	TMEM138	0.002639625	-1.344445114
ENSG00000234465	PINLYP	0.002645458	-1.144918283
ENSG00000160392	C19orf47	0.002590484	-1.013805699
ENSG00000149218	ENDOD1	0.002732798	-1.273187576
ENSG00000142694	EVA1B	0.002755169	-1.146629793
ENSG00000023902	PLEKHO1	0.002657565	-1.525346449
ENSG00000262788	UTP4	0.002861199	-1.030094761
ENSG00000277114	CNOT3	0.00286254	-1.393001302
ENSG00000275851	MLLT6	0.00279531	-1.049908245
ENSG00000124226	RNF114	0.002838739	-1.222723338
ENSG00000165416	SUGT1	0.002853594	-1.235835256
ENSG00000165115	KIF27	0.002817577	-1.159647553
ENSG00000101574	METTL4	0.002807943	-1.00154532
ENSG00000102287	GABRE	0.002862023	-1.00771744
ENSG00000196329	GIMAP5	0.00285764	-1.654336647
ENSG00000225447	RPS15AP10	0.002858344	-1.66667906
ENSG00000254206	NPIPB11	0.002821082	-1.013759849
ENSG00000143553	SNAPIN	0.002862021	-1.119681043
ENSG00000159374	M1AP	0.002805061	-1.193293785
ENSG00000276536	HRAS	0.003668066	-1.240321279
ENSG00000276061	NDUFA3	0.00450416	-0.975228789
ENSG00000276452	LILRB1	0.003051807	-1.663623672
ENSG00000278718	GSDMD	0.003837011	-1.244043253
ENSG00000238134	EHMT2	0.004129509	-1.00306587
ENSG00000274384	TMC4	0.004486752	-1.660843542
ENSG00000242361	HLA-DMA	0.004281859	-1.505173382
ENSG00000232045	EHMT2	0.004129509	-1.00306587
ENSG00000273761	DDX24	0.003158601	-1.400297556
ENSG00000281449	BCL2L14	0.003813568	-1.173584613
ENSG00000125870	SNRPB2	0.004551941	-1.185445948
ENSG00000206376	EHMT2	0.00293786	-1.075277587
ENSG00000283018	MRPS12	0.003971471	-1.100501689
ENSG00000101439	CST3	0.004525313	-0.758287524
ENSG00000012174	MBTPS2	0.003121327	-0.998262631
ENSG00000198276	UCKL1	0.003902341	-1.099852167
ENSG00000124279	FASTKD3	0.004079072	-0.974263594
ENSG00000147324	MFHAS1	0.004199091	-1.030136033
ENSG00000147421	HMBOX1	0.003075244	-1.058620395
ENSG00000086102	NFX1	0.004168621	-1.145945544
ENSG00000148481	MINDY3	0.003942095	-1.000832855
ENSG00000285206	PTPMT1	0.003614194	-1.101979653
ENSG00000128203	ASPHD2	0.003013733	-1.228443415
ENSG00000230869	AGAP10P	0.003457036	-1.392521922
ENSG00000185722	ANKFY1	0.003548394	-1.05669504
ENSG00000285007	REC8	0.003556239	-1.118575307
ENSG00000088356	PDRG1	0.004523022	-1.09876745
ENSG00000133422	MORC2	0.003128064	-1.022982538
ENSG00000119720	NRDE2	0.004457791	-1.030936704
ENSG00000184923	NUTM2A	0.003294366	-1.274635642
ENSG00000099968	BCL2L13	0.004392887	-1.315337681
ENSG00000065491	TBC1D22B	0.002958826	-1.054679941
ENSG00000100401	RANGAP1	0.004323447	-1.148408989
ENSG00000174227	PIGG	0.003260691	-1.068587793
ENSG00000157578	LCA5L	0.0045186	-0.965085568
ENSG00000151224	MAT1A	0.00412127	-0.957723104
ENSG00000196664	TLR7	0.004540856	-1.558665714
ENSG00000135315	CEP162	0.004550158	-1.090861332
ENSG00000285023	CHORDC1	0.004027418	-0.93515642
ENSG00000160180	TFF3	0.004463707	-1.120381399
ENSG00000099899	TRMT2A	0.004519842	-1.055455829
ENSG00000288185	IL27RA	0.004038519	-1.053297472
ENSG00000100084	HIRA	0.003926463	-1.048028704
ENSG00000277734	TRAC	0.003085234	-1.528679281
ENSG00000111912	NCOA7	0.00322361	-1.298214429
ENSG00000120051	CFAP58	0.003703404	-1.184426391
ENSG00000269896		0.003520634	-1.008426836
ENSG00000180879	SSR4	0.003966162	-1.451670755
ENSG00000283361	CFAP97D2	0.004324983	-1.28264371
ENSG00000172534	HCFC1	0.003960599	-1.242672823
ENSG00000100429	HDAC10	0.004312938	-1.069120951
ENSG00000145216	FIP1L1	0.003724832	-1.131960713
ENSG00000166012	TAF1D	0.003532905	-1.133953912
ENSG00000121380	BCL2L14	0.003813568	-1.173584613
ENSG00000163512	AZI2	0.003340626	-1.040754475
ENSG00000161179	YDJC	0.004130874	-1.075138153
ENSG00000155329	ZCCHC10	0.003298885	-1.036490124
ENSG00000108651	UTP6	0.003093771	-1.049368125
ENSG00000064607	SUGP2	0.002966509	-1.303684423
ENSG00000160299	PCNT	0.002956145	-1.122468143
ENSG00000108798	ABI3	0.003882168	-1.432669137
ENSG00000126067	PSMB2	0.003442554	-1.417263746
ENSG00000131196	NFATC1	0.002902155	-1.040721314
ENSG00000119574	ZBTB45	0.004015361	-1.044855549
ENSG00000099290	WASHC2A	0.004098463	-1.218199394
ENSG00000058272	PPP1R12A	0.004177641	-1.247001204
ENSG00000240972	MIF	0.004212882	-1.450635559
ENSG00000164576	SAP30L	0.003651581	-1.017611129
ENSG00000156218	ADAMTSL3	0.004146264	-0.987033528
ENSG00000066827	ZFAT	0.003107481	-1.131160931
ENSG00000141293	SKAP1	0.004343174	-1.085184449
ENSG00000135953	MFSD9	0.002875853	-1.022214268
ENSG00000176978	DPP7	0.004213673	-1.278231704
ENSG00000153237	CCDC148	0.003356122	-1.210690523
ENSG00000188229	TUBB4B	0.004542798	-1.056813506
ENSG00000112031	MTRF1L	0.003729135	-1.062641098
ENSG00000100288	CHKB	0.003146082	-1.241632876
ENSG00000100299	ARSA	0.003431686	-1.220344193
ENSG00000100575	TIMM9	0.004235399	-0.965176902
ENSG00000110172	CHORDC1	0.004027418	-0.93515642
ENSG00000183426	NPIPA1	0.003498487	-1.287286244
ENSG00000082515	MRPL22	0.004140782	-1.332669484
ENSG00000136718	IMP4	0.004332492	-1.076027302
ENSG00000165209	STRBP	0.003747092	-1.08822871
ENSG00000166226	CCT2	0.002957462	-1.218658499
ENSG00000106991	ENG	0.003102959	-1.289956962
ENSG00000113716	HMGXB3	0.00291343	-1.187873329
ENSG00000135736	CCDC102A	0.004066502	-1.08978776
ENSG00000173193	PARP14	0.004408194	-1.058162134
ENSG00000101040	ZMYND8	0.003406195	-1.211725025
ENSG00000070669	ASNS	0.003028474	-1.068282211
ENSG00000176182	MYPOP	0.003622969	-0.98344807
ENSG00000106397	PLOD3	0.003445409	-0.983673131
ENSG00000127452	FBXL12	0.004340623	-0.958322857
ENSG00000111142	METAP2	0.003407578	-1.262996708
ENSG00000258644	SYNJ2BP-COX16	0.003065709	-1.370748822
ENSG00000159618	ADGRG5	0.004496146	-1.199081933
ENSG00000188523	CFAP77	0.003915919	-1.337685975
ENSG00000163584	RPL22L1	0.004257717	-1.095612679
ENSG00000213930	GALT	0.004325083	-0.970578226
ENSG00000085644	ZNF213	0.003867293	-1.024147834
ENSG00000217930	PAM16	0.00373061	-1.055952835
ENSG00000134597	RBMX2	0.004282694	-0.978328916
ENSG00000262246	CORO7	0.003102454	-1.019035021
ENSG00000232388	SMIM26	0.004009841	-1.191000348
ENSG00000116824	CD2	0.003962941	-1.512149026
ENSG00000175938	ORAI3	0.00343107	-1.066638445
ENSG00000213015	ZNF580	0.003329667	-1.061802772
ENSG00000242338	BMS1P4	0.003909858	-1.159609506
ENSG00000175467	SART1	0.00455005	-1.196237326
ENSG00000158863	FHIP2B	0.004392705	-0.996490937
ENSG00000185880	TRIM69	0.003415861	-1.257176715
ENSG00000167600	CYP2S1	0.002918782	-1.289437663
ENSG00000109390	NDUFC1	0.003100186	-1.312523815
ENSG00000088881	EBF4	0.003792576	-1.243080379
ENSG00000039650	PNKP	0.002914108	-1.080004757
ENSG00000225614	ZNF469	0.003114333	-1.015623942
ENSG00000100628	ASB2	0.00344188	-1.088780987
ENSG00000103145	HCFC1R1	0.003178198	-1.091003427
ENSG00000162814	SPATA17	0.004067325	-1.110571508
ENSG00000104903	LYL1	0.003621516	-1.18086086
ENSG00000177239	MAN1B1	0.0038532	-1.33062953
ENSG00000067533	RRP15	0.004036034	-1.05276321
ENSG00000128585	MKLN1	0.003239383	-0.992167615
ENSG00000164331	ANKRA2	0.003173848	-1.005854081
ENSG00000003056	M6PR	0.00393613	-1.117336325
ENSG00000107130	NCS1	0.004028039	-0.988515076
ENSG00000177556	ATOX1	0.004446885	-1.271615893
ENSG00000186704	DTX2P1	0.003313099	-1.125173237
ENSG00000166986	MARS1	0.004207385	-1.101062979
ENSG00000253626	EIF5AL1	0.003575024	-1.101848403
ENSG00000010030	ETV7	0.004495528	-1.699360609
ENSG00000131435	PDLIM4	0.003540324	-1.28500757
ENSG00000168434	COG7	0.004095582	-1.083405805
ENSG00000088986	DYNLL1	0.004207195	-1.582958053
ENSG00000134058	CDK7	0.003761814	-1.056662745
ENSG00000127191	TRAF2	0.004532243	-0.925489424
ENSG00000111674	ENO2	0.004027292	-0.964471715
ENSG00000110536	PTPMT1	0.003614194	-1.101979653
ENSG00000138646	HERC5	0.004260681	-1.729737172
ENSG00000122386	ZNF205	0.003533504	-1.002369796
ENSG00000104998	IL27RA	0.004038519	-1.053297472
ENSG00000163463	KRTCAP2	0.004515477	-1.259966134
ENSG00000114450	GNB4	0.003369066	-1.022177518
ENSG00000079999	KEAP1	0.003011662	-1.297260781
ENSG00000176153	GPX2	0.002963694	-1.422211979
ENSG00000050344	NFE2L3	0.003853203	-1.124574637
ENSG00000172262	ZNF131	0.003243383	-0.99657524
ENSG00000128626	MRPS12	0.003591463	-1.101881867
ENSG00000105821	DNAJC2	0.004002795	-1.151932484
ENSG00000038210	PI4K2B	0.003607665	-1.058133156
ENSG00000110108	TMEM109	0.004399196	-1.354989977
ENSG00000100439	ABHD4	0.004164499	-0.967676034
ENSG00000112511	PHF1	0.003667218	-1.251047773
ENSG00000185187	SIGIRR	0.003311332	-1.304035358
ENSG00000171631	P2RY6	0.004241377	-1.602599649
ENSG00000171135	JAGN1	0.002995758	-1.191942812
ENSG00000100591	AHSA1	0.004110631	-1.335974733
ENSG00000113504	SLC12A7	0.004202398	-1.024358314
ENSG00000077380	DYNC1I2	0.0032826	-1.234654097
ENSG00000171163	ZNF692	0.003926829	-1.006223201
ENSG00000163536	SERPINI1	0.002932137	-1.035005021
ENSG00000122140	MRPS2	0.004080819	-1.1295286
ENSG00000123975	CKS2	0.003664094	-1.024562194
ENSG00000197265	GTF2E2	0.003027155	-1.037126774
ENSG00000154479	CFAP210	0.004368214	-1.327115507
ENSG00000108094	CUL2	0.004385616	-1.056913651
ENSG00000188931	CFAP126	0.004107369	-1.516816675
ENSG00000140598	EFL1	0.004354728	-1.11326772
ENSG00000214226	C17orf67	0.003727578	-1.096265657
ENSG00000145014	TMEM44	0.00383788	-1.111934071
ENSG00000188321	ZNF559	0.003562929	-0.979733785
ENSG00000134470	IL15RA	0.003292976	-1.370101442
ENSG00000196776	CD47	0.003816343	-0.780262851
ENSG00000138495	COX17	0.003250883	-1.241443274
ENSG00000136271	DDX56	0.003569337	-1.273202091
ENSG00000138433	CIR1	0.004222502	-1.201475421
ENSG00000095585	BLNK	0.004220631	-0.97254703
ENSG00000111596	CNOT2	0.00327353	-1.023885406
ENSG00000163482	STK36	0.003533457	-0.988018844
ENSG00000135912	TTLL4	0.004282551	-0.985727481
ENSG00000140553	UNC45A	0.004076752	-1.108750682
ENSG00000137601	NEK1	0.003874307	-1.081771311
ENSG00000026103	FAS	0.00335324	-1.299663338
ENSG00000163686	ABHD6	0.003816169	-0.960177047
ENSG00000213801	ZNF321P	0.004493699	-0.987144538
ENSG00000189134	NKAPL	0.004275971	-1.069038124
ENSG00000288591		0.004132241	-1.237538186
ENSG00000142544	CTU1	0.003113243	-1.062575848
ENSG00000109794	FAM149A	0.004224188	-1.070402396
ENSG00000164050	PLXNB1	0.004466452	-1.136884107
ENSG00000166801	FAM111A	0.003459849	-1.0940485
ENSG00000214447	FAM187A	0.003873926	-1.535957225
ENSG00000281348		0.003916772	-1.598166277
ENSG00000139410	SDSL	0.003543901	-1.176360679
ENSG00000163126	ANKRD23	0.003806001	-1.140420244
ENSG00000132329	RAMP1	0.003632846	-1.356665666
ENSG00000139131	YARS2	0.003368672	-1.113665892
ENSG00000125386	FAM193A	0.004290882	-1.015917863
ENSG00000168259	DNAJC7	0.003334322	-1.389050977
ENSG00000162543	UBXN10	0.004508787	-1.480058771
ENSG00000121716	PILRB	0.004364528	-1.185469631
ENSG00000146192	FGD2	0.002979259	-1.35208775
ENSG00000168394	TAP1	0.00424459	-1.336741083
ENSG00000156603	MED19	0.003346084	-1.107791992
ENSG00000112365	ZBTB24	0.004549976	-0.947829252
ENSG00000198851	CD3E	0.003191438	-1.434342826
ENSG00000132017	DCAF15	0.003462227	-1.065315812
ENSG00000175701	MTLN	0.00349391	-1.105120663
ENSG00000135148	TRAFD1	0.003869007	-1.244651462
ENSG00000288784	CTAGE4	0.003196681	-1.719205689
ENSG00000103550	KNOP1	0.004324796	-1.098294395
ENSG00000130479	MAP1S	0.002951943	-1.063151226
ENSG00000130513	GDF15	0.00349066	-1.5741104
ENSG00000205220	PSMB10	0.003993865	-1.507132767
ENSG00000198863	RUNDC1	0.003283833	-1.009995128
ENSG00000198286	CARD11	0.004021231	-1.192042978
ENSG00000174946	GPR171	0.003911353	-1.39620342
ENSG00000105894	PTN	0.00375693	-1.301104427
ENSG00000161996	WDR90	0.003789814	-1.32833357
ENSG00000167840	ZNF232	0.004435964	-1.001247074
ENSG00000238083	LRRC37A2	0.002933555	-1.19168711
ENSG00000168961	LGALS9	0.003750192	-1.409698996
ENSG00000127774	EMC6	0.003904489	-1.134351185
ENSG00000205763	RP9P	0.003496811	-0.977873393
ENSG00000223705	NSUN5P1	0.0031177	-1.039701723
ENSG00000180747	SMG1P3	0.003456786	-1.033888187
ENSG00000204217	BMPR2	0.004326547	-1.074510052
ENSG00000105397	TYK2	0.004031278	-1.322731671
ENSG00000213024	NUP62	0.004499123	-1.129688153
ENSG00000130816	DNMT1	0.004108189	-1.223660823
ENSG00000187778	MCRS1	0.003145573	-1.102610945
ENSG00000276045	ORAI1	0.003085995	-1.198085326
ENSG00000263528	IKBKE	0.003023133	-1.195745085
ENSG00000173653	RCE1	0.004294777	-1.018536778
ENSG00000116863	ADPRS	0.003606578	-1.304160868
ENSG00000115204	MPV17	0.004044932	-1.059075296
ENSG00000126749	EMG1	0.003291136	-1.100279325
ENSG00000179921	GPBAR1	0.003094525	-1.762570226
ENSG00000060642	PIGV	0.00329561	-1.214681911
ENSG00000133226	SRRM1	0.003220884	-0.994541924
ENSG00000163251	FZD5	0.00358053	-1.01708535
ENSG00000198892	SHISA4	0.004453857	-0.94667573
ENSG00000185860	CCDC190	0.003149448	-1.350293603
ENSG00000153563	CD8A	0.003144353	-1.389986248
ENSG00000134242	PTPN22	0.003681611	-1.000129063
ENSG00000162825	NBPF20	0.004069514	-1.022266079
ENSG00000143390	RFX5	0.004210823	-0.929419884
ENSG00000135749	PCNX2	0.004569796	-0.960494821
ENSG00000160294	MCM3AP	0.004583327	-1.066662796
ENSG00000173575	CHD2	0.004599195	-1.316869363
ENSG00000185127	C6orf120	0.004594444	-1.038991912
ENSG00000127993	RBM48	0.004617715	-0.958466874
ENSG00000139436	GIT2	0.004612877	-1.08842257
ENSG00000121410	A1BG	0.004632016	-1.147934702
ENSG00000125149	PHAF1	0.004639703	-0.925367415
ENSG00000159322	ADPGK	0.004656725	-1.053341954
ENSG00000278817		0.006884561	-1.420910436
ENSG00000262164	KRT39	0.005026386	-1.469620338
ENSG00000275333	FAM120B	0.004808619	-1.038902034
ENSG00000273642	NDUFA3	0.00519215	-0.907686161
ENSG00000275724	NDUFA3	0.00519215	-0.907686161
ENSG00000262666	FAM189B	0.004831861	-0.946041852
ENSG00000278365	NDUFA3	0.00519215	-0.907686161
ENSG00000276766	NDUFA3	0.00519215	-0.907686161
ENSG00000276220	NDUFA3	0.00519215	-0.907686161
ENSG00000277722	NDUFA3	0.00519215	-0.907686161
ENSG00000275605	NDUFA3	0.00519215	-0.907686161
ENSG00000276111	SDCCAG8	0.00549755	-1.003017776
ENSG00000274359	NDUFA3	0.00519215	-0.907686161
ENSG00000223618	VPS52	0.006653608	-1.026057525
ENSG00000276880	IFI27L1	0.005755946	-0.939967663
ENSG00000280477	RASA3	0.005889269	-0.897786176
ENSG00000125834	STK35	0.006470427	-0.971253715
ENSG00000215425	DDX39B	0.006738774	-0.925809847
ENSG00000185721	DRG1	0.006381177	-0.984733772
ENSG00000198743	SLC5A3	0.006140323	-0.968043371
ENSG00000156261	CCT8	0.005653365	-1.166774655
ENSG00000100346	CACNA1I	0.006202741	-1.335019124
ENSG00000089101	CFAP61	0.004756875	-1.083977066
ENSG00000283771	TMEM256	0.006672023	-0.967003243
ENSG00000185989	RASA3	0.005889269	-0.897786176
ENSG00000101361	NOP56	0.006350518	-1.098871045
ENSG00000283918	MRNIP	0.005801493	-1.011284834
ENSG00000205593	DENND6B	0.006687018	-1.156960596
ENSG00000183530	PRR14L	0.006080449	-0.907310578
ENSG00000151657	KIN	0.006441403	-0.908172306
ENSG00000215217	C5orf49	0.005525048	-1.498790632
ENSG00000185917	SETD4	0.006359269	-0.918405996
ENSG00000118939	UCHL3	0.005396479	-1.028569186
ENSG00000145990	GFOD1	0.005608879	-0.912318782
ENSG00000285460	BCAR1	0.006676492	-1.068933112
ENSG00000101342	TLDC2	0.006152237	-1.086700947
ENSG00000128829	EIF2AK4	0.006798374	-0.972120403
ENSG00000284889	PSME2	0.004697533	-1.342930067
ENSG00000167858	TEKT1	0.005541501	-1.378944589
ENSG00000102760	RGCC	0.006848799	-1.032361737
ENSG00000288512	C1R	0.006520366	-1.134266452
ENSG00000141934	PLPP2	0.005554222	-1.392035697
ENSG00000241489		0.00622449	-1.051759536
ENSG00000160183	TMPRSS3	0.005386198	-1.267540322
ENSG00000099812	MISP	0.005455731	-1.320671526
ENSG00000288217	PEX5	0.005579128	-1.046587278
ENSG00000060339	CCAR1	0.005834323	-1.214698
ENSG00000102786	INTS6	0.006409767	-0.905617747
ENSG00000172197	MBOAT1	0.006019245	-1.111426511
ENSG00000116032	GRIN3B	0.006832794	-1.370609493
ENSG00000283809		0.005037173	-0.966409029
ENSG00000125968	ID1	0.006298522	-1.356770724
ENSG00000175354	PTPN2	0.006268481	-1.065953828
ENSG00000125246	CLYBL	0.005057956	-0.945489351
ENSG00000112167	SAYSD1	0.005916687	-1.012936763
ENSG00000112759	SLC29A1	0.005293678	-0.934182597
ENSG00000104432	IL7	0.006724822	-0.923956322
ENSG00000100138	SNU13	0.004859781	-1.213708817
ENSG00000140464	PML	0.006780748	-0.842572533
ENSG00000101443	WFDC2	0.00622432	-1.776868432
ENSG00000166169	POLL	0.004739937	-1.033765705
ENSG00000171657	GPR82	0.006431869	-1.0723989
ENSG00000151353	TMEM18	0.005753814	-1.060852468
ENSG00000182903	ZNF721	0.00476432	-0.961865348
ENSG00000125843	AP5S1	0.00566195	-0.973334973
ENSG00000088827	SIGLEC1	0.005210819	-2.269041216
ENSG00000099330	OCEL1	0.00535864	-1.142364305
ENSG00000148824	MTG1	0.006598963	-1.081972071
ENSG00000141741	MIEN1	0.006221707	-1.161261342
ENSG00000187118	CMC1	0.006347093	-0.951143723
ENSG00000147224	PRPS1	0.006640743	-0.96301002
ENSG00000067221	STOML1	0.005164424	-1.111442702
ENSG00000107290	SETX	0.006447459	-1.159235177
ENSG00000125482	TTF1	0.006717079	-0.973296494
ENSG00000171307	ZDHHC16	0.00534099	-1.020248485
ENSG00000171222	SCAND1	0.006475143	-1.401449773
ENSG00000023445	BIRC3	0.006166927	-1.334574181
ENSG00000128346	C22orf23	0.006895867	-1.005471272
ENSG00000169188	APEX2	0.005103167	-0.967079504
ENSG00000108465	CDK5RAP3	0.004859662	-1.172640702
ENSG00000256061	DNAAF4	0.00505625	-1.297229434
ENSG00000188820	CALHM6	0.006882029	-1.779843827
ENSG00000143889	HNRNPLL	0.006049672	-1.04393269
ENSG00000189280	GJB5	0.005723113	-1.11316553
ENSG00000138083	SIX3	0.006308539	-1.279997201
ENSG00000159884	CCDC107	0.004817856	-1.056517409
ENSG00000215305	VPS16	0.006518724	-0.985345529
ENSG00000181191	PJA1	0.006373682	-1.012161897
ENSG00000236699	ARHGEF38	0.00520407	-0.975609545
ENSG00000242802	AP5Z1	0.005530143	-1.157638825
ENSG00000158458	NRG2	0.006626369	-0.978852918
ENSG00000140398	NEIL1	0.004720641	-1.120885412
ENSG00000100056	ESS2	0.005974251	-1.004899174
ENSG00000239900	ADSL	0.005700364	-1.062878919
ENSG00000100911	PSME2	0.004697533	-1.342930067
ENSG00000161281	COX7A1	0.005431486	-1.029208275
ENSG00000233024	NPIPA9	0.004712184	-1.168250998
ENSG00000004838	ZMYND10	0.005256681	-1.502658819
ENSG00000148362	PAXX	0.006645472	-0.996438129
ENSG00000215193	PEX26	0.005644248	-1.094083434
ENSG00000173467	AGR3	0.006537684	-1.331264065
ENSG00000101882	NKAP	0.005993123	-0.991819366
ENSG00000100567	PSMA3	0.005082896	-1.245139723
ENSG00000163666	HESX1	0.006370311	-1.434470021
ENSG00000046651	OFD1	0.005411798	-1.368023068
ENSG00000188483	IER5L	0.006205041	-1.138696759
ENSG00000196998	WDR45	0.00491113	-1.093452813
ENSG00000130731	METTL26	0.004689749	-1.105628809
ENSG00000184465	WDR27	0.005037504	-1.098887536
ENSG00000146733	PSPH	0.006327676	-0.987797915
ENSG00000063127	SLC6A16	0.00585658	-1.000858854
ENSG00000181027	FKRP	0.00626487	-0.903276575
ENSG00000244486	SCARF2	0.005544905	-1.18772638
ENSG00000102910	LONP2	0.004769842	-1.072984045
ENSG00000156345	CDK20	0.005294883	-1.110175459
ENSG00000185803	SLC52A2	0.006818084	-1.184389289
ENSG00000129003	VPS13C	0.006075644	-1.292937696
ENSG00000129990	SYT5	0.004983547	-1.249217767
ENSG00000167705	RILP	0.005392095	-0.992472384
ENSG00000131188	PRR7	0.005731503	-1.184953197
ENSG00000069702	TGFBR3	0.006044739	-0.90135252
ENSG00000088682	COQ9	0.006648312	-1.049301351
ENSG00000136908	DPM2	0.005278942	-1.113396779
ENSG00000124256	ZBP1	0.006488957	-2.026610622
ENSG00000100320	RBFOX2	0.005680329	-0.91872994
ENSG00000173947	PIFO	0.005252206	-1.606682854
ENSG00000178685	PARP10	0.006273395	-1.030204278
ENSG00000103264	FBXO31	0.006487259	-0.893960862
ENSG00000100395	L3MBTL2	0.005505221	-1.12181728
ENSG00000185946	RNPC3	0.006112213	-0.9310393
ENSG00000103121	CMC2	0.00509518	-1.0048747
ENSG00000205544	TMEM256	0.006672023	-0.967003243
ENSG00000123143	PKN1	0.005111659	-1.106014522
ENSG00000065268	WDR18	0.006900333	-1.136782228
ENSG00000122390	NAA60	0.006412541	-1.027642962
ENSG00000103671	TRIP4	0.005660657	-0.95802153
ENSG00000147202	DIAPH2	0.006686492	-1.063614796
ENSG00000122965	RBM19	0.00668399	-0.909818209
ENSG00000100342	APOL1	0.00541295	-1.029614199
ENSG00000254996	ANKHD1-EIF4EBP3	0.006012138	-1.066334184
ENSG00000090971	NAT14	0.005270893	-1.272749343
ENSG00000218891	ZNF579	0.005228952	-0.977828352
ENSG00000171443	ZNF524	0.006664038	-1.056096262
ENSG00000171425	ZNF581	0.006721696	-0.972000731
ENSG00000128607	KLHDC10	0.00619674	-0.905729986
ENSG00000172500	FIBP	0.00551378	-1.112999442
ENSG00000175573	C11orf68	0.005125347	-1.067251454
ENSG00000148356	LRSAM1	0.005053414	-1.029565851
ENSG00000244165	P2RY11	0.005586341	-1.000717836
ENSG00000156521	TYSND1	0.006541487	-1.061325512
ENSG00000124659	TBCC	0.005760223	-1.039610386
ENSG00000132321	IQCA1	0.006328351	-1.248084476
ENSG00000064393	HIPK2	0.006138546	-0.949860911
ENSG00000130511	SSBP4	0.005555637	-1.247440939
ENSG00000282826	FRG1CP	0.006136428	-1.098101661
ENSG00000204237	OXLD1	0.006571198	-1.064065249
ENSG00000204392	LSM2	0.005258478	-1.114917421
ENSG00000186198	SLC51B	0.005270125	-1.043806929
ENSG00000112539	C6orf118	0.005004597	-1.185343555
ENSG00000179364	PACS2	0.005835004	-1.073684849
ENSG00000115694	STK25	0.004832838	-1.040144155
ENSG00000205155	PSENEN	0.005366404	-1.509189773
ENSG00000186638	KIF24	0.006101132	-1.053886408
ENSG00000090861	AARS1	0.005860182	-1.233227374
ENSG00000136870	ZNF189	0.005603076	-0.965120506
ENSG00000161618	ALDH16A1	0.00631581	-1.22080591
ENSG00000119922	IFIT2	0.006623802	-2.312667884
ENSG00000126458	RRAS	0.005794094	-1.006210722
ENSG00000151665	PIGF	0.006833234	-0.983383279
ENSG00000286264		0.005727666	-0.938646327
ENSG00000139266	MARCHF9	0.006038813	-1.028823613
ENSG00000119431	HDHD3	0.005879087	-1.159130899
ENSG00000171798	KNDC1	0.005541319	-1.183894938
ENSG00000240065	PSMB9	0.005052701	-1.380041328
ENSG00000204822	MRPL53	0.006028866	-1.140701508
ENSG00000185361	TNFAIP8L1	0.005565225	-1.44633256
ENSG00000104689	TNFRSF10A	0.006871052	-0.910629181
ENSG00000160972	PPP1R16A	0.005216462	-1.248183014
ENSG00000129654	FOXJ1	0.006864047	-1.622445396
ENSG00000189377	CXCL17	0.006862893	-1.515335949
ENSG00000103274	NUBP1	0.005946366	-1.03954977
ENSG00000129295	DNAAF11	0.006166662	-0.98250227
ENSG00000182108	DEXI	0.00619045	-1.033147814
ENSG00000159403	C1R	0.006520366	-1.134266452
ENSG00000005206	SPPL2B	0.006781756	-1.049301812
ENSG00000094631	HDAC6	0.006163779	-1.120060556
ENSG00000214160	ALG3	0.005804073	-1.002305405
ENSG00000011304	PTBP1	0.006904258	-1.197936677
ENSG00000143786	CNIH3	0.004802894	-0.989609238
ENSG00000130363	RSPH3	0.0058809	-0.976094335
ENSG00000162086	ZNF75A	0.006139778	-0.914145924
ENSG00000172345	STARD5	0.005755826	-1.216998553
ENSG00000213085	CFAP45	0.006452465	-1.442796862
ENSG00000105671	DDX49	0.005970974	-1.072202787
ENSG00000068120	COASY	0.005274993	-1.115884114
ENSG00000165684	SNAPC4	0.006339544	-1.096525737
ENSG00000145002	FAM86B2	0.005012942	-1.222962306
ENSG00000170667	RASA4B	0.006854554	-1.08162706
ENSG00000183208	GDPGP1	0.005230221	-0.94437168
ENSG00000128052	KDR	0.00672508	-1.143465117
ENSG00000168275	COA6	0.006855428	-1.0868601
ENSG00000159713	TPPP3	0.005691649	-1.757029659
ENSG00000163795	ZNF513	0.006647846	-0.935106455
ENSG00000161010	MRNIP	0.005973546	-1.004972166
ENSG00000108797	CNTNAP1	0.005178043	-1.24443417
ENSG00000157150	TIMP4	0.006421618	-1.226300153
ENSG00000169248	CXCL11	0.005524545	-2.939706753
ENSG00000104723	TUSC3	0.00486378	-1.261688445
ENSG00000172409	CLP1	0.005131532	-0.974941138
ENSG00000221944	TIGD1	0.006800578	-0.942147862
ENSG00000110448	CD5	0.006080924	-1.192576367
ENSG00000285082		0.005650394	-1.150318168
ENSG00000023330	ALAS1	0.006589846	-1.241027615
ENSG00000158850	B4GALT3	0.00558646	-0.947491723
ENSG00000174007	CEP19	0.006901309	-0.906467959
ENSG00000136827	TOR1A	0.006760363	-1.058568701
ENSG00000187239	FNBP1	0.005068401	-1.191652235
ENSG00000146574	CCZ1B	0.006649396	-1.051119823
ENSG00000285799		0.00676	-1.149643617
ENSG00000167645	YIF1B	0.006037361	-1.049124717
ENSG00000106804	C5	0.005285048	-0.953120948
ENSG00000107669	ATE1	0.006337467	-1.075757092
ENSG00000120093	HOXB3	0.00564075	-1.312221365
ENSG00000139637	MYG1	0.006558526	-1.15341813
ENSG00000165282	PIGO	0.006580343	-1.176175948
ENSG00000122674	CCZ1	0.004977949	-1.263232758
ENSG00000230453	ANKRD18B	0.006289551	-1.31513754
ENSG00000260459	FTLP14	0.006787443	-1.148748875
ENSG00000138398	PPIG	0.005980496	-1.309071622
ENSG00000066923	STAG3	0.005912416	-1.373115141
ENSG00000186063	AIDA	0.005434946	-0.95410842
ENSG00000027847	B4GALT7	0.006463054	-0.971450745
ENSG00000205085	GARIN1A	0.006786295	-1.005584892
ENSG00000104936	DMPK	0.005220908	-1.115856079
ENSG00000116747	RO60	0.006178613	-0.929096963
ENSG00000166839	ANKDD1A	0.005674268	-0.989381016
ENSG00000174353	STAG3L3	0.006903504	-0.915379101
ENSG00000137656	BUD13	0.006891086	-1.001629907
ENSG00000106077	ABHD11	0.00657062	-1.106345542
ENSG00000176928	GCNT4	0.004692922	-0.976474181
ENSG00000168000	BSCL2	0.004959999	-1.544864651
ENSG00000179902	CFAP276	0.00494712	-1.553824211
ENSG00000123992	DNPEP	0.006069725	-1.141357782
ENSG00000162613	FUBP1	0.006695742	-0.954582286
ENSG00000171530	TBCA	0.006073583	-1.211641415
ENSG00000107960	STN1	0.005287246	-1.251130823
ENSG00000111671	SPSB2	0.005529241	-1.087461232
ENSG00000159788	RGS12	0.006904694	-1.057275115
ENSG00000185338	SOCS1	0.006173941	-1.909714854
ENSG00000169379	ARL13B	0.00478516	-0.987270708
ENSG00000050426	LETMD1	0.006310756	-0.940083593
ENSG00000061936	SFSWAP	0.004929692	-1.084597825
ENSG00000161955	TNFSF13	0.004978654	-1.266943224
ENSG00000267369	TAF5LP1	0.006370383	-1.501018248
ENSG00000203799	CCDC162P	0.005085449	-1.132615913
ENSG00000132600	PRMT7	0.004998483	-1.173771906
ENSG00000160051	IQCC	0.006623407	-1.000169244
ENSG00000103495	MAZ	0.005519102	-1.289530861
ENSG00000127419	TMEM175	0.005325082	-1.015050725
ENSG00000166582	CENPV	0.006216971	-0.926770581
ENSG00000156171	DRAM2	0.004815483	-1.008131584
ENSG00000110497	AMBRA1	0.00504481	-0.949416181
ENSG00000089335	ZNF302	0.006822604	-0.9597655
ENSG00000154222	CC2D1B	0.005339136	-1.077438797
ENSG00000124562	SNRPC	0.005855991	-1.172381179
ENSG00000064999	ANKS1A	0.005545221	-1.112111365
ENSG00000133895	MEN1	0.005340378	-1.079527161
ENSG00000173465	ZNRD2	0.006461111	-1.045911618
ENSG00000115977	AAK1	0.005556822	-1.105676313
ENSG00000179604	CDC42EP4	0.005187323	-0.975880837
ENSG00000130726	TRIM28	0.005172638	-1.237559441
ENSG00000184924	PTRHD1	0.005518267	-1.11908409
ENSG00000277258	PCGF2	0.006759976	-0.986231678
ENSG00000137959	IFI44L	0.005747405	-1.863551593
ENSG00000136247	ZDHHC4	0.005539829	-1.147111416
ENSG00000141086	CTRL	0.005054335	-1.10008581
ENSG00000093134	VNN3P	0.006373109	-1.37567181
ENSG00000141012	GALNS	0.006042438	-0.965511617
ENSG00000131148	EMC8	0.006499578	-0.973920408
ENSG00000108700	CCL8	0.005988017	-3.265681655
ENSG00000143294	PRCC	0.006827228	-0.997753754
ENSG00000249115	HAUS5	0.006209785	-1.041222276
ENSG00000128604	IRF5	0.004786196	-1.112410253
ENSG00000188486	H2AX	0.00508373	-1.117193685
ENSG00000108256	NUFIP2	0.006717567	-1.040688311
ENSG00000239521	CASTOR3	0.005908588	-0.923492166
ENSG00000162105	SHANK2	0.006103622	-0.944543183
ENSG00000151503	NCAPD3	0.00523368	-0.988515865
ENSG00000163882	POLR2H	0.006516302	-1.143025005
ENSG00000116649	SRM	0.005888536	-0.989877869
ENSG00000117616	RSRP1	0.005886562	-1.124570143
ENSG00000261740	BOLA2-SMG1P6	0.006743625	-1.019187101
ENSG00000284649		0.006832491	-1.259966069
ENSG00000172508	CARNS1	0.00582042	-1.336632978
ENSG00000174173	TRMT10C	0.004876658	-0.994958271
ENSG00000135976	ANKRD36	0.006469746	-1.244062481
ENSG00000139180	NDUFA9	0.005539573	-1.143557366
ENSG00000104859	CLASRP	0.006657307	-0.978598892
ENSG00000234851	RPL23AP42	0.006655002	-1.324298785
ENSG00000132182	NUP210	0.006901538	-1.029736538
ENSG00000143479	DYRK3	0.005568963	-0.932550986
ENSG00000182326	C1S	0.004718839	-1.107793654
ENSG00000228474	OST4	0.00569234	-1.244452618
ENSG00000138073	PREB	0.005952253	-1.026788069
ENSG00000197956	S100A6	0.005853384	-0.624258804
ENSG00000154813	DPH3	0.005399114	-1.052941188
ENSG00000160172	FAM86C2P	0.00538788	-0.930788393
ENSG00000251474	RPL32P3	0.005848525	-1.273673889
ENSG00000177842	ZNF620	0.005098337	-1.033602125
ENSG00000168876	ANKRD49	0.005550443	-0.906763834
ENSG00000115839	RAB3GAP1	0.005593866	-1.160536322
ENSG00000141378	PTRH2	0.006285294	-0.965878478
ENSG00000025434	NR1H3	0.00533804	-1.186474961
ENSG00000115459	ELMOD3	0.005007861	-0.964881938
ENSG00000168899	VAMP5	0.005054216	-1.426774317
ENSG00000168887	C2orf68	0.005331365	-0.98321826
ENSG00000113966	ARL6	0.005709688	-1.044595899
ENSG00000175707	KDF1	0.004859456	-1.038722959
ENSG00000246082	NUDT16L2P	0.006891817	-0.90277584
ENSG00000154451	GBP5	0.006840829	-1.895368578
ENSG00000040487	SLC66A1	0.006069022	-0.952028508
ENSG00000144029	MRPS5	0.005968412	-1.164251643
ENSG00000181218	H2AW	0.004735149	-1.007201366
ENSG00000135900	MRPL44	0.006714551	-1.050876826
ENSG00000142961	MOB3C	0.005429617	-1.174214
ENSG00000229689		0.006870343	-0.946702316
ENSG00000173372	C1QA	0.005352931	-1.534373456
ENSG00000159189	C1QC	0.006240433	-1.513924767
ENSG00000143429	LSP1P4	0.005282218	-0.993025925
ENSG00000162437	RAVER2	0.005331575	-0.975269288
ENSG00000215908	CROCCP2	0.006043311	-1.272018325
ENSG00000182632	CCNYL2	0.006973119	-1.120768839
ENSG00000125818	PSMF1	0.006995475	-1.015670861
ENSG00000108591	DRG2	0.00702904	-0.962249049
ENSG00000100600	LGMN	0.006994251	-1.276349335
ENSG00000088256	GNA11	0.0069886	-0.996270222
ENSG00000197168	NEK5	0.006969502	-1.249953861
ENSG00000127526	SLC35E1	0.006918436	-0.940830519
ENSG00000127578	WFIKKN1	0.006943604	-1.212654755
ENSG00000121289	CEP89	0.006989031	-0.970772832
ENSG00000105171	POP4	0.006955741	-1.009880907
ENSG00000198816	ZNF358	0.006994069	-1.064465417
ENSG00000185049	NELFA	0.00696734	-0.934433078
ENSG00000205208	C4orf46	0.006984233	-0.906846465
ENSG00000089356	FXYD3	0.007021734	-0.764055709
ENSG00000103051	COG4	0.007028288	-1.10303186
ENSG00000110888	CAPRIN2	0.007013893	-0.964367218
ENSG00000078246	TULP3	0.007011122	-0.939361927
ENSG00000062598	ELMO2	0.007123168	-0.912786768
ENSG00000100294	MCAT	0.007309902	-1.022725142
ENSG00000128408	RIBC2	0.007166665	-1.097735783
ENSG00000139684	ESD	0.007369543	-1.065976458
ENSG00000139083	ETV6	0.007247925	-0.907428877
ENSG00000169062	UPF3A	0.007234615	-1.103438924
ENSG00000111224	PARP11	0.007190568	-0.928563128
ENSG00000172239	PAIP1	0.007312956	-1.07516122
ENSG00000107140	TESK1	0.007117145	-0.991274791
ENSG00000250571	GLI4	0.007240074	-0.910831474
ENSG00000259295	CSPG4P12	0.007342458	-0.962727496
ENSG00000184436	THAP7	0.007397189	-1.096584648
ENSG00000100336	APOL4	0.007385991	-1.522231953
ENSG00000235859		0.007365027	-0.895247881
ENSG00000188599	NPIPP1	0.007200142	-1.020163706
ENSG00000165792	METTL17	0.00723095	-0.94456118
ENSG00000129255	MPDU1	0.007096957	-1.089898161
ENSG00000141504	SAT2	0.007266579	-1.111762182
ENSG00000101577	LPIN2	0.007107729	-1.02494908
ENSG00000145414	NAF1	0.007184834	-0.904500851
ENSG00000188026	RILPL1	0.00732046	-0.926861752
ENSG00000184898	RBM43	0.00728697	-0.961705368
ENSG00000172426	RSPH9	0.007397166	-1.345568514
ENSG00000174996	KLC2	0.007183892	-0.94677737
ENSG00000076356	PLXNA2	0.007374126	-0.987476747
ENSG00000162222	TTC9C	0.007249516	-0.947180487
ENSG00000137817	PARP6	0.007370188	-1.134108544
ENSG00000135903	PAX3	0.007302391	-0.911425327
ENSG00000166881	NEMP1	0.007060289	-0.882457681
ENSG00000164975	SNAPC3	0.007236706	-0.986137842
ENSG00000114735	HEMK1	0.007373044	-1.155514769
ENSG00000204149	AGAP6	0.007134292	-0.958976222
ENSG00000185085	INTS5	0.007079945	-1.027978603
ENSG00000259404	EFL1P1	0.007284632	-0.927808357
ENSG00000106635	BCL7B	0.007301614	-1.007174179
ENSG00000214367	HAUS3	0.007105942	-0.912129238
ENSG00000249715	FER1L5	0.007342569	-1.055714309
ENSG00000213337	ANKRD39	0.007092954	-1.092136591
ENSG00000168959	GRM5	0.007302498	-1.235361879
ENSG00000065882	TBC1D1	0.007303579	-1.067777204
ENSG00000168040	FADD	0.007279687	-1.058831731
ENSG00000168286	THAP11	0.007394457	-1.021209988
ENSG00000163946	TASOR	0.007276877	-1.14996464
ENSG00000004399	PLXND1	0.00727651	-0.994770477
ENSG00000174844	DNAH12	0.007212219	-1.390924203
ENSG00000143740	SNAP47	0.007180949	-1.086310436
ENSG00000170955	CAVIN3	0.007276419	-1.073473961
ENSG00000042493	CAPG	0.007069368	-1.305458968
ENSG00000178053	MLF1	0.007240173	-1.297102831
ENSG00000188687	SLC4A5	0.007290673	-1.068423207
ENSG00000117472	TSPAN1	0.007296141	-0.843882775
ENSG00000177272	KCNA3	0.007389086	-1.235729316
ENSG00000004534	RBM6	0.007420542	-1.052325467
ENSG00000106591	MRPL32	0.007433802	-1.060145665
ENSG00000129696	TTI2	0.007509641	-0.921683404
ENSG00000166246	DNAAF8	0.007465254	-1.344918118
ENSG00000157827	FMNL2	0.007492352	-0.891038704
ENSG00000179262	RAD23A	0.007470455	-1.109748733
ENSG00000243056	EIF4EBP3	0.00751349	-1.065080717
ENSG00000165731	RET	0.007460127	-1.341491665
ENSG00000143633	C1orf131	0.007537111	-0.900119753
ENSG00000172324	OR5A2	0.007492301	-0.89797694
ENSG00000108826	MRPL27	0.007534811	-1.120978553
ENSG00000206561	COLQ	0.00746229	-1.019902732
ENSG00000048405	ZNF800	0.007539972	-0.879293647
ENSG00000119760	SUPT7L	0.007482324	-1.036377468
ENSG00000142751	GPN2	0.007452497	-0.892949027
ENSG00000170264	FAM161A	0.007524304	-1.032876249
ENSG00000066185	ZMYND12	0.007541237	-1.072946566
ENSG00000118292	C1orf54	0.007538139	-1.017538425
ENSG00000198546	ZNF511	0.007549471	-1.031635957
ENSG00000165868	HSPA12A	0.007575261	-1.083936104
ENSG00000276561	IRF7	0.008474862	-1.317060018
ENSG00000275118	MBOAT7	0.008668266	-1.223761097
ENSG00000242711	PSMB9	0.008337551	-2.952835332
ENSG00000125898	FAM110A	0.008395182	-1.00208504
ENSG00000230624	DDX39B	0.008166968	-0.916638944
ENSG00000132792	CTNNBL1	0.008769579	-1.20922585
ENSG00000229496	DDX39B	0.008369842	-0.915373418
ENSG00000284454	NPIPB13	0.007732794	-0.989140508
ENSG00000204977	TRIM13	0.008634929	-1.015331168
ENSG00000284841	H2AW	0.007749638	-0.953597616
ENSG00000178473	UCN3	0.008042726	-1.457267794
ENSG00000183580	FBXL7	0.008565591	-0.886568461
ENSG00000021776	AQR	0.007992428	-0.991430335
ENSG00000128245	YWHAH	0.007763298	-1.1380657
ENSG00000112996	MRPS30	0.007619654	-0.934552055
ENSG00000106733	NMRK1	0.008728206	-1.017544699
ENSG00000070778	PTPN21	0.008302091	-0.88763905
ENSG00000100811	YY1	0.00807812	-0.939749464
ENSG00000136100	VPS36	0.008452221	-0.857417206
ENSG00000288408	UBL7	0.008872063	-0.955416106
ENSG00000186866	POFUT2	0.008644152	-0.886126383
ENSG00000172171	TEFM	0.008771447	-0.891991179
ENSG00000101160	CTSZ	0.008126485	-1.343349097
ENSG00000146166	LGSN	0.008824638	-1.124365905
ENSG00000288325	GPS2	0.008648334	-0.937097362
ENSG00000063587	ZNF275	0.00867485	-0.88388323
ENSG00000178741	COX5A	0.008555734	-1.267288923
ENSG00000123136	DDX39A	0.008832563	-1.002683826
ENSG00000138629	UBL7	0.008872063	-0.955416106
ENSG00000137574	TGS1	0.008109088	-0.910582119
ENSG00000157796	WDR19	0.008152599	-1.01791501
ENSG00000215271	HOMEZ	0.008780833	-0.940036734
ENSG00000130177	CDC16	0.007776992	-1.152209831
ENSG00000160305	DIP2A	0.007894362	-0.972563431
ENSG00000144596	GRIP2	0.008419041	-1.875004815
ENSG00000064490	RFXANK	0.008216101	-1.158124419
ENSG00000100281	HMGXB4	0.007826624	-0.867974735
ENSG00000171055	FEZ2	0.008497699	-0.927687403
ENSG00000268279		0.008557194	-1.380606613
ENSG00000105676	ARMC6	0.008094223	-0.953824807
ENSG00000171311	EXOSC1	0.008134486	-0.919405077
ENSG00000126062	TMEM115	0.00883717	-1.110554262
ENSG00000186312	CA5BP1	0.008064512	-0.885086747
ENSG00000092094	OSGEP	0.008377755	-0.9090985
ENSG00000198000	NOL8	0.007627007	-0.890880466
ENSG00000142684	ZNF593	0.008271068	-1.008488168
ENSG00000168143	FAM83B	0.007943003	-0.895333448
ENSG00000107938	EDRF1	0.008584642	-0.877851536
ENSG00000100722	ZC3H14	0.007925456	-0.941079916
ENSG00000124313	IQSEC2	0.007623533	-0.927074183
ENSG00000120539	MASTL	0.00849077	-0.955541181
ENSG00000189114	BLOC1S3	0.008587789	-0.882346942
ENSG00000182307	C8orf33	0.008247259	-0.956176334
ENSG00000133640	LRRIQ1	0.008647193	-1.275286187
ENSG00000099960	SLC7A4	0.008706665	-0.994478953
ENSG00000147548	NSD3	0.008371392	-0.948100355
ENSG00000113594	LIFR	0.008281827	-0.959519726
ENSG00000167578	RAB4B	0.007764364	-1.125270384
ENSG00000109881	CCDC34	0.008247115	-1.268790311
ENSG00000203950	RTL8A	0.007648737	-0.981416615
ENSG00000075413	MARK3	0.007850949	-1.195178555
ENSG00000139990	DCAF5	0.008124042	-0.980753045
ENSG00000126016	AMOT	0.008347459	-0.892568509
ENSG00000183258	DDX41	0.008212533	-1.018746207
ENSG00000139218	SCAF11	0.007671238	-0.938493866
ENSG00000253352	TUG1	0.008383623	-1.053612625
ENSG00000184162	NR2C2AP	0.008240924	-0.896384685
ENSG00000110628	SLC22A18	0.008430821	-1.048852416
ENSG00000122705	CLTA	0.008450516	-1.315817459
ENSG00000017483	SLC38A5	0.00825706	-1.296889036
ENSG00000006453	BAIAP2L1	0.008459553	-0.988813919
ENSG00000133028	SCO1	0.007920735	-0.946142518
ENSG00000105967	TFEC	0.008481879	-1.610522825
ENSG00000063241	ISOC2	0.008649601	-1.151795903
ENSG00000125484	GTF3C4	0.008429992	-0.901489882
ENSG00000143198	MGST3	0.008270105	-1.161107181
ENSG00000196968	FUT11	0.008673655	-0.918360942
ENSG00000156502	SUPV3L1	0.008849234	-0.918096618
ENSG00000166189	HPS6	0.007928068	-1.036990361
ENSG00000148341	SH3GLB2	0.008520112	-1.182926873
ENSG00000123810	B9D2	0.008668606	-1.11763143
ENSG00000180992	MRPL14	0.007750849	-1.15874505
ENSG00000102103	PQBP1	0.008540641	-1.109898871
ENSG00000132522	GPS2	0.008648334	-0.937097362
ENSG00000124571	XPO5	0.008801206	-0.864674789
ENSG00000176473	WDR25	0.008055212	-0.935500116
ENSG00000170265	ZNF282	0.008757567	-0.881423155
ENSG00000256053	COA8	0.008754279	-0.918842542
ENSG00000062524	LTK	0.00783875	-1.133602302
ENSG00000103932	RPAP1	0.008551443	-0.890656627
ENSG00000161914	ZNF653	0.008105283	-0.982789394
ENSG00000127884	ECHS1	0.008131257	-1.270326302
ENSG00000103148	NPRL3	0.007662016	-0.893556706
ENSG00000074266	EED	0.008849235	-0.952125028
ENSG00000169252	ADRB2	0.008356699	-0.994441004
ENSG00000103061	SLC7A6OS	0.008288074	-0.873282734
ENSG00000133321	PLAAT4	0.008605374	-0.861799191
ENSG00000102226	USP11	0.008203236	-0.975286394
ENSG00000144959	NCEH1	0.007676571	-0.930470155
ENSG00000174606	ANGEL2	0.008344568	-0.894285037
ENSG00000132323	ILKAP	0.008885135	-0.919428477
ENSG00000214517	PPME1	0.008802181	-1.019137534
ENSG00000144535	DIS3L2	0.008594757	-0.980998797
ENSG00000178531	CTXN1	0.008726672	-1.465652203
ENSG00000130234	ACE2	0.008562289	-1.266280416
ENSG00000110063	DCPS	0.007667058	-1.061221442
ENSG00000181004	BBS12	0.007797244	-0.975336062
ENSG00000008226	DLEC1	0.007904246	-1.356349949
ENSG00000178605	GTPBP6	0.008260629	-1.069521256
ENSG00000181378	CFAP65	0.008880436	-1.243471001
ENSG00000163516	ANKZF1	0.008589751	-0.930248608
ENSG00000124508	BTN2A2	0.008381475	-0.934600761
ENSG00000213339	QTRT1	0.008052739	-0.989796393
ENSG00000087269	NOP14	0.007923253	-1.0104928
ENSG00000166228	PCBD1	0.00853683	-1.132486601
ENSG00000138172	CALHM2	0.008041523	-1.041103436
ENSG00000129007	CALML4	0.008463389	-1.443153592
ENSG00000142233	NTN5	0.008783478	-1.36319187
ENSG00000224383	PRR29	0.007729499	-1.226944337
ENSG00000111364	DDX55	0.008053513	-0.891107622
ENSG00000072858	SIDT1	0.008262732	-0.90151626
ENSG00000122678	POLM	0.008406393	-0.862033247
ENSG00000057935	MTA3	0.007818847	-0.892131889
ENSG00000164889	SLC4A2	0.007774454	-1.108224262
ENSG00000113810	SMC4	0.007666504	-1.025299381
ENSG00000256079	FAM133GP	0.008086461	-1.588876773
ENSG00000273841	TAF9	0.007609721	-1.07574314
ENSG00000139865	TTC6	0.007999329	-1.08627053
ENSG00000106948	AKNA	0.008372763	-1.276002374
ENSG00000182180	MRPS16	0.008159355	-1.019773846
ENSG00000104979	C19orf53	0.00769545	-1.122346727
ENSG00000176046	NUPR1	0.008081952	-1.187848158
ENSG00000182544	MFSD5	0.008777997	-0.997714093
ENSG00000103966	EHD4	0.007706219	-1.180333048
ENSG00000153406	NMRAL1	0.008305469	-0.998141092
ENSG00000176485	PLAAT3	0.008188804	-1.142195813
ENSG00000132591	ERAL1	0.007946794	-0.982168759
ENSG00000163481	RNF25	0.008885184	-0.908568092
ENSG00000137504	CREBZF	0.008554326	-0.882711822
ENSG00000175203	DCTN2	0.007872044	-1.137978111
ENSG00000223802	CERS1	0.008585284	-1.106369687
ENSG00000168214	RBPJ	0.007891404	-1.167042368
ENSG00000134056	MRPS36	0.008247201	-1.009906852
ENSG00000162004	CCDC78	0.008484581	-1.469041997
ENSG00000143157	POGK	0.007982814	-0.973084615
ENSG00000213139	CRYGS	0.008588017	-0.983247033
ENSG00000145220	LYAR	0.008890123	-0.902554392
ENSG00000169704	GP9	0.008037671	-1.336822213
ENSG00000214279	SCART1	0.008685899	-0.933530357
ENSG00000008324	SS18L2	0.00794702	-0.946181268
ENSG00000008517	IL32	0.007961557	-1.471651424
ENSG00000115155	OTOF	0.008077187	-2.133545232
ENSG00000172809	RPL38	0.008198524	-1.425693341
ENSG00000080603	SRCAP	0.007700334	-1.004713933
ENSG00000158773	USF1	0.008868568	-1.113677337
ENSG00000104897	SF3A2	0.00808553	-0.991104159
ENSG00000178502	KLHL11	0.00855873	-0.900892363
ENSG00000169291	SHE	0.008425514	-0.893278643
ENSG00000205129	C4orf47	0.008276906	-1.071186822
ENSG00000205482	SPDYE18	0.007708585	-1.325903238
ENSG00000070423	RNF126	0.008324254	-1.079328772
ENSG00000115970	THADA	0.007679481	-1.103810935
ENSG00000204371	EHMT2	0.00801556	-0.957219091
ENSG00000124074	ENKD1	0.008023775	-1.122192429
ENSG00000204789	ZNF204P	0.008494242	-1.02906102
ENSG00000139405	RITA1	0.007942396	-1.089032731
ENSG00000174177	CTU2	0.007962688	-0.935364993
ENSG00000128699	ORMDL1	0.007799768	-1.067107975
ENSG00000173818	ENDOV	0.008168494	-0.892352688
ENSG00000213965	NUDT19	0.00839424	-0.9261208
ENSG00000204381	LAYN	0.00829121	-1.033757827
ENSG00000196689	TRPV1	0.008205646	-0.943875194
ENSG00000228409	CCT6P1	0.00812095	-0.87913851
ENSG00000100726	TELO2	0.008779692	-0.944717629
ENSG00000277639		0.008690273	-1.410398257
ENSG00000108433	GOSR2	0.00803716	-0.942908735
ENSG00000105612	DNASE2	0.008419407	-1.162945054
ENSG00000138439	FAM117B	0.008810675	-0.859633276
ENSG00000099341	PSMD8	0.007731129	-1.264403739
ENSG00000183734	ASCL2	0.00841688	-1.112085438
ENSG00000149792	MRPL49	0.00883449	-0.949462284
ENSG00000150316	CWC15	0.008535594	-1.063832397
ENSG00000115648	MLPH	0.008195676	-1.143610267
ENSG00000119777	TMEM214	0.007835636	-0.95783106
ENSG00000137496	IL18BP	0.008746974	-1.88368975
ENSG00000125046	SSUH2	0.008009735	-1.539025162
ENSG00000162972	MAIP1	0.008245053	-0.915101196
ENSG00000142973	CYP4B1	0.008867243	-1.589939651
ENSG00000117305	HMGCL	0.008682287	-1.100989203
ENSG00000163026	WDCP	0.008423359	-0.873715795
ENSG00000119203	CPSF3	0.008068165	-0.928990138
ENSG00000177674	AGTRAP	0.008246481	-1.20459974
ENSG00000133997	MED6	0.008925056	-0.920902019
ENSG00000175550	DRAP1	0.008941672	-1.314505126
ENSG00000220201	ZGLP1	0.008934923	-1.172085226
ENSG00000153066	TXNDC11	0.008937822	-1.013039637
ENSG00000204843	DCTN1	0.008939103	-1.085899718
ENSG00000099940	SNAP29	0.008969865	-0.910858854
ENSG00000163872	YEATS2	0.008968495	-0.861908534
ENSG00000142002	DPP9	0.008958078	-0.862697596
ENSG00000124275	MTRR	0.008992072	-0.857303961
ENSG00000169288	MRPL1	0.009019659	-0.887255126
ENSG00000198918	RPL39	0.00902382	-1.432474695
ENSG00000121073	SLC35B1	0.009033743	-1.020739477
ENSG00000116691	MIIP	0.009019398	-0.939441953
ENSG00000160991	ORAI2	0.009030952	-1.16582203
ENSG00000169016	E2F6	0.009054393	-0.91449344
ENSG00000090520	DNAJB11	0.009050237	-1.234066152
ENSG00000160345	PIERCE1	0.009082614	-1.355496634
ENSG00000261846	AADACL2	0.009147915	-1.588337419
ENSG00000228964	HLA-B	0.009124668	-2.01759084
ENSG00000136270	TBRG4	0.009098789	-0.912397187
ENSG00000175727	MLXIP	0.009142715	-0.927579849
ENSG00000196503	ARL9	0.009121614	-1.090913784
ENSG00000204673	AKT1S1	0.009119518	-1.073137371
ENSG00000172725	CORO1B	0.009091646	-1.245742881
ENSG00000129757	CDKN1C	0.009150243	-1.058320451
ENSG00000106290	TAF6	0.009130318	-1.07690172
ENSG00000205138	SDHAF1	0.009141577	-0.942192097
ENSG00000165782	PIP4P1	0.009178411	-1.006466944
ENSG00000140675	SLC5A2	0.009175884	-1.140640763
ENSG00000028116	VRK2	0.009170592	-0.934626661
ENSG00000197279	ZNF165	0.009162352	-0.89937737
ENSG00000139668	WDFY2	0.009362844	-0.949603577
ENSG00000128159	TUBGCP6	0.009452758	-1.011628862
ENSG00000198951	NAGA	0.00941764	-1.044115377
ENSG00000113583	C5orf15	0.009289397	-0.956144018
ENSG00000156928	MALSU1	0.009206989	-0.947090968
ENSG00000146731	CCT6A	0.009422443	-1.063407577
ENSG00000079974	RABL2B	0.009443004	-1.224247376
ENSG00000086758	HUWE1	0.009396219	-0.892240734
ENSG00000185339	TCN2	0.009213324	-1.274540479
ENSG00000138135	CH25H	0.009373038	-1.106088158
ENSG00000080608	PUM3	0.009198779	-0.856013952
ENSG00000178149	DALRD3	0.009250016	-1.205002765
ENSG00000149201	CCDC81	0.009293252	-1.170215066
ENSG00000137267	TUBB2A	0.009358248	-1.272676755
ENSG00000085231	AK6	0.009333706	-0.875750758
ENSG00000169241	SLC50A1	0.00944251	-0.995072414
ENSG00000161036	LRWD1	0.009256657	-1.075951913
ENSG00000110060	PUS3	0.009279624	-0.899500707
ENSG00000138835	RGS3	0.009288899	-0.976725758
ENSG00000204590	GNL1	0.009349463	-0.861545373
ENSG00000105258	POLR2I	0.00937092	-1.247746865
ENSG00000187866	PABIR1	0.009205094	-0.926987558
ENSG00000015153	YAF2	0.009370782	-0.864246385
ENSG00000172123	SLFN12	0.00938125	-0.888171075
ENSG00000172269	DPAGT1	0.009355237	-1.083416432
ENSG00000143303	METTL25B	0.009417102	-0.909611632
ENSG00000232859	LYRM9	0.009385351	-0.979411958
ENSG00000149716	LTO1	0.009424633	-0.874228309
ENSG00000278619	MRM1	0.009300716	-1.780435433
ENSG00000142227	EMP3	0.009339119	-1.309078947
ENSG00000239704	CDRT4	0.009271403	-1.089795343
ENSG00000173207	CKS1B	0.009405559	-1.035878516
ENSG00000163617	CCDC191	0.009239777	-0.944516312
ENSG00000115484	CCT4	0.009255698	-1.170377305
ENSG00000143379	SETDB1	0.0094174	-0.886569657
ENSG00000162643	DNAI3	0.009441528	-1.274674472
ENSG00000000971	CFH	0.009300498	-1.328621875
ENSG00000127054	INTS11	0.009352598	-1.018495112
ENSG00000268043	NBPF12	0.009447207	-0.939082411
ENSG00000111796	KLRB1	0.00948535	-1.146602398
ENSG00000243660	ZNF487	0.009490063	-1.101675701
ENSG00000186487	MYT1L	0.009479376	-1.09848532
ENSG00000282813	ARMC10	0.010183529	-0.954441478
ENSG00000236346	NFKBIL1	0.010072543	-0.849257725
ENSG00000206440	NFKBIL1	0.010072543	-0.849257725
ENSG00000280975	CENATAC	0.010199688	-0.839533444
ENSG00000236196	NFKBIL1	0.010072543	-0.849257725
ENSG00000227565	NFKBIL1	0.010072543	-0.849257725
ENSG00000234530	NFKBIL1	0.010072543	-0.849257725
ENSG00000283946	CHRNB1	0.009848378	-0.850340426
ENSG00000159231	CBR3	0.009649396	-1.208835511
ENSG00000087842	PIR	0.01031728	-1.083523941
ENSG00000205863	C1QTNF9B	0.009657662	-1.02429806
ENSG00000135069	PSAT1	0.00979683	-0.913199914
ENSG00000197620	EOLA1	0.009642433	-0.968564256
ENSG00000099817	POLR2E	0.009894359	-1.183257232
ENSG00000188243	COMMD6	0.009848908	-1.103884116
ENSG00000141959	PFKL	0.00976329	-1.233740399
ENSG00000165084	C8orf34	0.010132803	-0.962675017
ENSG00000196405	EVL	0.009907704	-1.002836767
ENSG00000118407	FILIP1	0.009922137	-1.111016188
ENSG00000187742	SECISBP2	0.010197325	-0.893950532
ENSG00000253710	ALG11	0.00969324	-1.074277116
ENSG00000145782	ATG12	0.010127688	-0.926334415
ENSG00000142655	PEX14	0.009832566	-0.969998048
ENSG00000141627	DYM	0.009728812	-0.848685863
ENSG00000172057	ORMDL3	0.009956608	-1.067460965
ENSG00000184677	ZBTB40	0.009619858	-0.937614777
ENSG00000141753	IGFBP4	0.009522919	-1.364700992
ENSG00000145649	GZMA	0.009946701	-1.566678325
ENSG00000148908	RGS10	0.010259993	-1.024435605
ENSG00000214114	MYCBP	0.009553182	-1.017378239
ENSG00000010818	HIVEP2	0.009956934	-1.182568346
ENSG00000117419	ERI3	0.010029734	-1.074111786
ENSG00000181991	MRPS11	0.010034365	-0.924994751
ENSG00000115875	SRSF7	0.010235162	-1.178851704
ENSG00000111605	CPSF6	0.009552444	-0.925322431
ENSG00000173145	NOC3L	0.009880011	-0.84452123
ENSG00000185551	NR2F2	0.009910428	-1.013447179
ENSG00000184949	FAM227A	0.010224499	-0.900171347
ENSG00000120725	SIL1	0.009674317	-1.015431748
ENSG00000148384	INPP5E	0.009755335	-1.052599211
ENSG00000138640	FAM13A	0.0097594	-0.953417421
ENSG00000047579	DTNBP1	0.010076214	-0.99062976
ENSG00000171566	PLRG1	0.009675259	-0.942226838
ENSG00000161677	JOSD2	0.010311041	-1.114010387
ENSG00000170175	CHRNB1	0.009848378	-0.850340426
ENSG00000042753	AP2S1	0.009732388	-1.164540204
ENSG00000160472	TMEM190	0.010095523	-1.519165234
ENSG00000165695	AK8	0.00957344	-1.371839358
ENSG00000248771	SMIM31	0.010229166	-1.114788067
ENSG00000113068	PFDN1	0.009722185	-0.988042945
ENSG00000107672	NSMCE4A	0.009783008	-0.98705603
ENSG00000135090	TAOK3	0.009807762	-0.875453681
ENSG00000104365	IKBKB	0.010045023	-1.017865566
ENSG00000284024		0.010307077	-0.83665029
ENSG00000262814	MRPL12	0.009649204	-1.17008772
ENSG00000182979	MTA1	0.009727918	-1.000221626
ENSG00000260643		0.009636641	-0.936222053
ENSG00000125375	DMAC2L	0.009936463	-0.953103048
ENSG00000186919	ZACN	0.009839341	-0.983287661
ENSG00000168569	TMEM223	0.00995899	-0.916957942
ENSG00000175581	MRPL48	0.009624582	-0.936384854
ENSG00000103043	VAC14	0.009931402	-1.047260967
ENSG00000251411		0.010253082	-1.091368238
ENSG00000174547	MRPL11	0.010241188	-1.08230463
ENSG00000010610	CD4	0.010087533	-1.069333441
ENSG00000135914	HTR2B	0.009714015	-1.74753049
ENSG00000066427	ATXN3	0.010139954	-0.86666462
ENSG00000126264	HCST	0.010206828	-1.168995743
ENSG00000108786	HSD17B1	0.010170303	-0.905528634
ENSG00000119147	ECRG4	0.0099046	-1.356564428
ENSG00000136518	ACTL6A	0.010245367	-0.884030535
ENSG00000136522	MRPL47	0.010195922	-1.071399317
ENSG00000138316	ADAMTS14	0.009785714	-0.967365136
ENSG00000261221	ZNF865	0.010276537	-0.8810732
ENSG00000107779	BMPR1A	0.009512501	-0.903959302
ENSG00000259330	INAFM2	0.010084137	-0.92559678
ENSG00000172336	POP7	0.010099919	-0.976110528
ENSG00000188818	ZDHHC11	0.010317894	-0.972366221
ENSG00000037241	RPL26L1	0.009789034	-0.999566602
ENSG00000011243	AKAP8L	0.009923791	-1.128352416
ENSG00000179841	AKAP5	0.01026752	-1.020351607
ENSG00000196659	TTC30B	0.010151157	-1.011224517
ENSG00000019582	CD74	0.010049187	-0.922007203
ENSG00000186166	CENATAC	0.010199688	-0.839533444
ENSG00000177954	RPS27	0.009581693	-1.598516297
ENSG00000167862	MRPL58	0.009852285	-0.949802923
ENSG00000023572	GLRX2	0.009856059	-0.880436184
ENSG00000166592	RRAD	0.010305484	-1.354382948
ENSG00000050393	MCUR1	0.009806098	-0.959875332
ENSG00000146067	FAM193B	0.009716798	-0.93974817
ENSG00000122574	WIPF3	0.009983542	-0.934740877
ENSG00000111832	RWDD1	0.010001857	-0.958676174
ENSG00000163703	CRELD1	0.010257095	-0.995915856
ENSG00000118096	IFT46	0.010136205	-1.093350839
ENSG00000173852	DPY19L1	0.010323692	-1.014114291
ENSG00000150556	LYPD6B	0.009640428	-1.034360565
ENSG00000157778	PSMG3	0.010141139	-1.112081997
ENSG00000063169	BICRA	0.009645051	-0.930959627
ENSG00000023171	GRAMD1B	0.009622351	-0.948351613
ENSG00000264538	SUZ12P1	0.010214979	-0.855887796
ENSG00000159753	CARMIL2	0.009558798	-1.190361236
ENSG00000254986	DPP3	0.010190595	-0.891366764
ENSG00000103266	STUB1	0.00998141	-1.135411577
ENSG00000121775	TMEM39B	0.00965511	-0.872817165
ENSG00000160050	CCDC28B	0.009815078	-0.862190637
ENSG00000071575	TRIB2	0.010213327	-1.088762778
ENSG00000111450	STX2	0.010295916	-0.901850654
ENSG00000256269	HMBS	0.009922911	-0.940560004
ENSG00000141564	RPTOR	0.009935073	-0.879194804
ENSG00000184988	TMEM106A	0.009522101	-1.116370224
ENSG00000269720	CCDC194	0.009773575	-1.607268252
ENSG00000170364	SETMAR	0.010220311	-0.884663661
ENSG00000149262	INTS4	0.010317509	-0.982162743
ENSG00000163848	ZNF148	0.010207505	-0.875595845
ENSG00000084636	COL16A1	0.009787095	-0.878195194
ENSG00000131788	PIAS3	0.010098524	-1.026034496
ENSG00000225828	FAM229A	0.009949898	-0.905427247
ENSG00000227372	TP73-AS1	0.009543045	-1.194911555
ENSG00000132879	FBXO44	0.009865166	-0.858602354
ENSG00000266472	MRPS21	0.009699163	-1.178745824
ENSG00000162441	LZIC	0.010152772	-0.869862466
ENSG00000171421	MRPL36	0.01035574	-0.965965873
ENSG00000069493	CLEC2D	0.010344755	-0.950222874
ENSG00000143333	RGS16	0.01035172	-1.148562026
ENSG00000182484	WASH6P	0.010365233	-0.940517272
ENSG00000198839	ZNF277	0.01037507	-0.888794329
ENSG00000105583	WDR83OS	0.010397048	-1.122216617
ENSG00000267673	FDX2	0.010384915	-0.898315586
ENSG00000132485	ZRANB2	0.010390956	-0.90906302
ENSG00000151240	DIP2C	0.010430435	-0.875709344
ENSG00000166963	MAP1A	0.010503251	-1.327829563
ENSG00000112304	ACOT13	0.010438477	-1.225308483
ENSG00000157637	SLC38A10	0.01047681	-1.006688727
ENSG00000099949	LZTR1	0.010432328	-0.845947187
ENSG00000258289	CHURC1	0.010503019	-1.063684716
ENSG00000006607	FARP2	0.010484414	-0.843115355
ENSG00000171202	TMEM126A	0.01046178	-0.912587031
ENSG00000105298	CACTIN	0.010502775	-0.934937833
ENSG00000126106	TMEM53	0.010488563	-1.03623723
ENSG00000139168	ZCRB1	0.010468262	-1.258208147
ENSG00000172215	CXCR6	0.010431547	-1.257681795
ENSG00000197763	TXNRD3	0.010450549	-0.924496773
ENSG00000129071	MBD4	0.010512722	-0.895334541
ENSG00000127554	GFER	0.010529081	-1.016606845
ENSG00000140105	WARS1	0.01070393	-1.589832038
ENSG00000119705	SLIRP	0.010670282	-1.083581442
ENSG00000131697	NPHP4	0.01072141	-0.955928535
ENSG00000164961	WASHC5	0.0107376	-0.852328688
ENSG00000123545	NDUFAF4	0.010574321	-0.956599693
ENSG00000156831	NSMCE2	0.010597188	-0.900387858
ENSG00000187860	CCDC157	0.010675304	-1.128315713
ENSG00000121067	SPOP	0.010741485	-0.902844217
ENSG00000165698	SPACA9	0.010721241	-1.246217686
ENSG00000129084	PSMA1	0.010605989	-1.056179069
ENSG00000187260	WDR86	0.010650343	-1.041952927
ENSG00000170855	TRIAP1	0.010631478	-0.917173477
ENSG00000170190	SLC16A5	0.010599625	-1.037892194
ENSG00000123154	WDR83	0.010667035	-0.94118186
ENSG00000011009	LYPLA2	0.010676444	-1.058525644
ENSG00000131876	SNRPA1	0.010579901	-0.953513591
ENSG00000176029	C11orf16	0.010710233	-1.083123657
ENSG00000180357	ZNF609	0.010676038	-0.859874
ENSG00000214013	GANC	0.010575768	-0.847265236
ENSG00000155506	LARP1	0.010727301	-0.882485865
ENSG00000103549	RNF40	0.010652948	-1.031169051
ENSG00000092330	TINF2	0.010722994	-1.161517253
ENSG00000090581	GNPTG	0.010552471	-1.144890637
ENSG00000123609	NMI	0.01071259	-1.251732961
ENSG00000048649	RSF1	0.010729145	-0.998076572
ENSG00000169976	SF3B5	0.010699346	-1.183556217
ENSG00000079691	CARMIL1	0.010702637	-1.002028213
ENSG00000082512	TRAF5	0.010726216	-0.848995141
ENSG00000186710	CFAP73	0.010593606	-1.36709978
ENSG00000196912	ANKRD36B	0.010540183	-1.156814788
ENSG00000136631	VPS45	0.010660732	-0.952734933
ENSG00000166454	ATMIN	0.010749287	-0.981542173
ENSG00000274523	RCC1L	0.010773	-0.97019823
ENSG00000165609	NUDT5	0.010799365	-0.964468793
ENSG00000163453	IGFBP7	0.010794693	-1.430323203
ENSG00000115541	HSPE1	0.010797019	-1.242682382
ENSG00000219200	RNASEK	0.01080781	-1.300669806
ENSG00000204856	FAM216A	0.010826882	-0.86242027
ENSG00000095059	DHPS	0.010824449	-0.914902425
ENSG00000124784	RIOK1	0.010910908	-0.839689878
ENSG00000129932	DOHH	0.010875925	-0.898132372
ENSG00000173013	CCDC96	0.010878794	-1.215121774
ENSG00000154144	TBRG1	0.01086811	-0.931572945
ENSG00000100038	TOP3B	0.010906672	-0.834651184
ENSG00000142700	DMRTA2	0.010899879	-1.068116063
ENSG00000141030	COPS3	0.01085541	-0.912423139
ENSG00000111837	MAK	0.010901124	-0.976597799
ENSG00000008869	HEATR5B	0.010899245	-0.860001111
ENSG00000159214	CCDC24	0.010866498	-1.024156841
ENSG00000124444	ZNF576	0.010868841	-0.890503756
ENSG00000105248	YJU2	0.010929646	-0.961624003
ENSG00000186976	EFCAB6	0.011015596	-1.087443356
ENSG00000204070	SYS1	0.011012393	-0.89434153
ENSG00000146425	DYNLT1	0.010984727	-0.675045247
ENSG00000006530	AGK	0.010985174	-0.872398847
ENSG00000196976	LAGE3	0.010978604	-0.980592366
ENSG00000138385	SSB	0.010994084	-1.033014987
ENSG00000105700	KXD1	0.010987725	-0.947667069
ENSG00000131848	ZSCAN5A	0.010961617	-0.845393043
ENSG00000130165	ELOF1	0.01094879	-1.062307175
ENSG00000030066	NUP160	0.010995961	-0.8558606
ENSG00000158163	DZIP1L	0.011009785	-0.920317544
ENSG00000171067	C11orf24	0.011026204	-0.850805774
ENSG00000160932	LY6E	0.011056108	-0.902073357
ENSG00000278677	H2AC17	0.011046891	-1.192984822
ENSG00000110925	CSRNP2	0.011058987	-0.859831883
ENSG00000084072	PPIE	0.011051386	-0.990543186
ENSG00000276371	SINHCAF	0.011278647	-0.886664603
ENSG00000276910	GTF2H2	0.011466299	-0.991533628
ENSG00000206468	UBD	0.011341658	-1.921276335
ENSG00000285377	EMC9	0.011394582	-0.844452228
ENSG00000187051	RPS19BP1	0.011097103	-1.137449626
ENSG00000243156	MICAL3	0.011186192	-0.837480339
ENSG00000134504	KCTD1	0.011300747	-1.105555297
ENSG00000006125	AP2B1	0.011426319	-1.00255581
ENSG00000164309	CMYA5	0.01110929	-0.997036603
ENSG00000160298	C21orf58	0.01112682	-1.263146674
ENSG00000247315	ZCCHC3	0.0112567	-0.940407006
ENSG00000263368	MSANTD3P1	0.011377118	-1.135832109
ENSG00000119655	NPC2	0.011069893	-1.216033579
ENSG00000171612	SLC25A33	0.011383038	-0.891568382
ENSG00000124243	BCAS4	0.011361579	-0.92467319
ENSG00000107554	DNMBP	0.011500562	-0.975099141
ENSG00000074201	CLNS1A	0.011430747	-0.98728092
ENSG00000100908	EMC9	0.011394582	-0.844452228
ENSG00000173557	FAM166C	0.011470444	-0.957239873
ENSG00000164649	CDCA7L	0.011226025	-0.908065254
ENSG00000133265	HSPBP1	0.011402952	-1.160702253
ENSG00000114125	RNF7	0.011390342	-1.06221885
ENSG00000185900	POMK	0.011277124	-0.876535034
ENSG00000047457	CP	0.011230645	-1.183396917
ENSG00000180900	SCRIB	0.011103531	-1.026934687
ENSG00000112110	MRPL18	0.011122894	-1.07584168
ENSG00000153774	CFDP1	0.011172243	-1.123930181
ENSG00000131652	THOC6	0.011105623	-0.928027708
ENSG00000067829	IDH3G	0.011187266	-0.994182627
ENSG00000172586	CHCHD1	0.01152691	-1.067762216
ENSG00000118197	DDX59	0.011466684	-0.860334688
ENSG00000059588	TARBP1	0.011398013	-0.827019595
ENSG00000179144	GIMAP7	0.011270655	-1.497404008
ENSG00000132478	UNK	0.011108827	-0.840339562
ENSG00000132465	JCHAIN	0.011315612	-1.496397096
ENSG00000071246	VASH1	0.011531255	-0.861048948
ENSG00000082269	FAM135A	0.011418765	-0.908080472
ENSG00000160408	ST6GALNAC6	0.011486925	-1.15884988
ENSG00000113083	LOX	0.011466672	-0.899308518
ENSG00000148832	PAOX	0.011483513	-0.935385164
ENSG00000113360	DROSHA	0.011339424	-0.885096826
ENSG00000260007		0.011302828	-1.319378496
ENSG00000159111	MRPL10	0.011447122	-0.956278867
ENSG00000176087	SLC35A4	0.011458839	-1.1017361
ENSG00000130283	GDF1	0.011397954	-1.184821807
ENSG00000162961	DPY30	0.011500824	-1.171160466
ENSG00000157869	RAB28	0.011226084	-0.902759298
ENSG00000091986	CCDC80	0.011210026	-0.910390572
ENSG00000151364	KCTD14	0.011441349	-0.937808634
ENSG00000119383	PTPA	0.011334795	-1.148577113
ENSG00000144381	HSPD1	0.011221063	-1.25417636
ENSG00000142235	LMTK3	0.011275155	-1.114855838
ENSG00000250803		0.011511131	-1.249702713
ENSG00000166598	HSP90B1	0.011299617	-1.379684479
ENSG00000172366	MCRIP2	0.01143199	-1.078185064
ENSG00000266173	STRADA	0.011512153	-0.890437721
ENSG00000132341	RAN	0.011274417	-1.203434739
ENSG00000105372	RPS19	0.011318771	-0.664170928
ENSG00000170633	RNF34	0.01123477	-0.960547067
ENSG00000142396	ERVK3-1	0.011340502	-0.91095637
ENSG00000184281	TSSC4	0.011167889	-1.042391675
ENSG00000266028	SRGAP2	0.011537082	-0.866878458
ENSG00000116898	MRPS15	0.011234794	-1.127756006
ENSG00000090273	NUDC	0.011289922	-1.222170668
ENSG00000119782	FKBP1B	0.011316428	-0.854192804
ENSG00000115128	SF3B6	0.011170546	-1.088399507
ENSG00000164002	EXO5	0.011457016	-0.834187664
ENSG00000081019	RSBN1	0.011517202	-0.94486262
ENSG00000132781	MUTYH	0.011417194	-0.864594825
ENSG00000166889	PATL1	0.011559055	-0.99464954
ENSG00000136451	VEZF1	0.011553312	-1.02903962
ENSG00000164430	CGAS	0.011572647	-1.084584103
ENSG00000035115	SH3YL1	0.011584778	-0.95555429
ENSG00000005059	MCUB	0.011609101	-1.020627441
ENSG00000203667	COX20	0.011605122	-1.079507051
ENSG00000023734	STRAP	0.011632021	-1.089672024
ENSG00000182612	TSPAN10	0.011629145	-0.875265474
ENSG00000102606	ARHGEF7	0.011649707	-0.851862538
ENSG00000169592	INO80E	0.011673146	-0.978362937
ENSG00000175283	DOLK	0.01168112	-0.951347878
ENSG00000267680	ZNF224	0.011672534	-0.830253355
ENSG00000143799	PARP1	0.011690769	-1.145010247
ENSG00000103540	CCP110	0.011696361	-0.846324623
ENSG00000243749	TMEM35B	0.011689757	-0.931156984
ENSG00000233927	RPS28	0.011715499	-1.573437271
ENSG00000180822	PSMG4	0.011712996	-0.970170471
ENSG00000138744	NAAA	0.01171731	-0.872659142
ENSG00000240230	COX19	0.011736407	-0.821270865
ENSG00000104957	YJU2B	0.011733666	-0.897380807
ENSG00000013306	SLC25A39	0.011745178	-1.086565899
ENSG00000113971	NPHP3	0.011757018	-0.840262741
ENSG00000079257	LXN	0.011763652	-1.023997513
ENSG00000113812	ACTR8	0.011776849	-0.850523463
ENSG00000080189	SLC35C2	0.011817669	-0.923642458
ENSG00000102100	SLC35A2	0.01180654	-1.05489438
ENSG00000197557	TTC30A	0.011805324	-1.034438806
ENSG00000105618	PRPF31	0.011818987	-0.952201429
ENSG00000178188	SH2B1	0.011804129	-0.878668491
ENSG00000198712	MT-CO2	0.012282958	-0.625647567
ENSG00000280759	AP2A2	0.012051096	-0.887772911
ENSG00000132952	USPL1	0.01219373	-0.853699186
ENSG00000102316	MAGED2	0.012014383	-1.304335759
ENSG00000126790	L3HYPDH	0.011964418	-0.968008728
ENSG00000091542	ALKBH5	0.012033113	-1.141003461
ENSG00000242732	RTL5	0.012174526	-0.93853817
ENSG00000137288	UQCC2	0.012356659	-1.145703817
ENSG00000135324	MRAP2	0.012174056	-1.002795565
ENSG00000131966	ACTR10	0.01209188	-0.955738588
ENSG00000288453	DCAF15	0.011901064	-0.850847376
ENSG00000110104	CCDC86	0.012271517	-0.923998559
ENSG00000185386	MAPK11	0.012117398	-0.824320771
ENSG00000119640	ACYP1	0.012088486	-0.951885703
ENSG00000183978	COA3	0.012364822	-1.146667448
ENSG00000186973	FAM183A	0.012261126	-1.282498979
ENSG00000116151	MORN1	0.012316957	-1.067872853
ENSG00000167967	E4F1	0.011942666	-0.845144592
ENSG00000203965	EFCAB7	0.012233883	-0.82438542
ENSG00000113845	TIMMDC1	0.011842661	-0.981204919
ENSG00000204837	FGF7P3	0.012194711	-0.892120434
ENSG00000141759	TXNL4A	0.012277026	-1.065034078
ENSG00000105677	TMEM147	0.012285507	-1.063159192
ENSG00000079134	THOC1	0.011856127	-0.842698138
ENSG00000138942	RNF185	0.012365918	-0.985497015
ENSG00000102962	CCL22	0.012165907	-0.979693016
ENSG00000125755	SYMPK	0.011970521	-0.985497677
ENSG00000137171	KLC4	0.012396744	-0.89863549
ENSG00000124237	C20orf85	0.011989826	-1.482650877
ENSG00000126775	ATG14	0.011929605	-0.879994333
ENSG00000172361	CFAP53	0.012288297	-1.28077953
ENSG00000105364	MRPL4	0.012169185	-1.060896959
ENSG00000168944	CEP120	0.012324915	-0.985478873
ENSG00000149577	SIDT2	0.012260464	-0.840584653
ENSG00000006327	TNFRSF12A	0.012350218	-1.211862938
ENSG00000113407	TARS1	0.012224771	-0.936245084
ENSG00000089234	BRAP	0.011905168	-0.878714996
ENSG00000204316	MRPL38	0.012255833	-0.957271286
ENSG00000185347	TEDC1	0.011968368	-0.975108886
ENSG00000185236	RAB11B	0.012375164	-1.030401776
ENSG00000188921	HACD4	0.012277925	-0.929771287
ENSG00000072864	NDE1	0.012190291	-0.889247368
ENSG00000221909	FAM200A	0.012170619	-0.838633365
ENSG00000198121	LPAR1	0.012337432	-0.83942429
ENSG00000269242		0.011870845	-1.38482623
ENSG00000142327	RNPEPL1	0.011856549	-1.062747428
ENSG00000135750	KCNK1	0.012284943	-0.914792053
ENSG00000108298	RPL19	0.011987184	-1.488488632
ENSG00000176410	DNAJC30	0.01215829	-0.966102215
ENSG00000166860	ZBTB39	0.012173792	-0.829531889
ENSG00000135722	FBXL8	0.012277694	-0.850390476
ENSG00000114395	CYB561D2	0.012014775	-0.997020578
ENSG00000130303	BST2	0.012385215	-0.992684414
ENSG00000146833	TRIM4	0.012394118	-0.867134452
ENSG00000112592	TBP	0.0121647	-0.867446859
ENSG00000165502	RPL36AL	0.012227939	-1.231759226
ENSG00000144580	CNOT9	0.01223454	-0.861794382
ENSG00000006611	USH1C	0.012327489	-1.045464015
ENSG00000132406	TMEM128	0.012376666	-0.958943581
ENSG00000135205	CCDC146	0.012137623	-1.106682405
ENSG00000198246	SLC29A3	0.012123479	-0.883470281
ENSG00000110711	AIP	0.012101615	-1.081922104
ENSG00000009954	BAZ1B	0.012064216	-1.003845864
ENSG00000067057	PFKP	0.012354954	-1.097886575
ENSG00000250317	SMIM20	0.01204984	-0.94299344
ENSG00000282034		0.012160036	-1.072304583
ENSG00000198492	YTHDF2	0.012356222	-0.882912821
ENSG00000114841	DNAH1	0.012194133	-1.109508704
ENSG00000164049	FBXW12	0.012225199	-1.05395333
ENSG00000135390	ATP5MC2	0.012357522	-1.299650522
ENSG00000153879	CEBPG	0.012357006	-1.001143675
ENSG00000162430	SELENON	0.012090396	-1.043116635
ENSG00000084764	MAPRE3	0.012204771	-1.114984075
ENSG00000160679	CHTOP	0.012197183	-1.133796289
ENSG00000116885	OSCP1	0.012336372	-1.13588886
ENSG00000130695	CEP85	0.012055033	-0.852130987
ENSG00000173163	COMMD1	0.012090475	-0.944289219
ENSG00000117477	CCDC181	0.012362255	-1.091153871
ENSG00000162736	NCSTN	0.012310071	-1.151569839
ENSG00000198793	MTOR	0.012001628	-0.93586398
ENSG00000133477	FAM83F	0.012448173	-1.035640669
ENSG00000168685	IL7R	0.012421604	-0.902055744
ENSG00000040933	INPP4A	0.01243626	-0.850440121
ENSG00000114354	TFG	0.012430436	-1.064885245
ENSG00000139974	SLC38A6	0.012447004	-0.826093289
ENSG00000170298	LGALS9B	0.01242766	-0.97348451
ENSG00000143106	PSMA5	0.012448221	-1.171283266
ENSG00000285442	FBXL6	0.01260047	-0.813674563
ENSG00000182489	XKRX	0.012545074	-0.834134364
ENSG00000087302	RTRAF	0.012513477	-1.073633161
ENSG00000172466	ZNF24	0.01250097	-0.958070796
ENSG00000184208	C22orf46	0.012498261	-0.918680603
ENSG00000151553	FHIP2A	0.012563044	-0.842690931
ENSG00000162598	C1orf87	0.012541129	-1.252831545
ENSG00000166716	ZNF592	0.012459963	-0.931912605
ENSG00000182325	FBXL6	0.01260047	-0.813674563
ENSG00000127124	HIVEP3	0.012546899	-0.829931769
ENSG00000104983	CCDC61	0.012592608	-0.833596176
ENSG00000112651	MRPL2	0.012482579	-0.962346914
ENSG00000204147	ASAH2B	0.012537146	-0.851220909
ENSG00000196118	CFAP119	0.012549392	-1.214581859
ENSG00000187474	FPR3	0.012553918	-1.572658595
ENSG00000063176	SPHK2	0.012606522	-0.956496091
ENSG00000225921	NOL7	0.012530667	-0.983866182
ENSG00000172661	WASHC2C	0.012603708	-1.044351001
ENSG00000171861	MRM3	0.012522519	-0.8216435
ENSG00000162148	PPP1R32	0.012528406	-1.218614801
ENSG00000118257	NRP2	0.012475367	-0.831148175
ENSG00000188994	ZNF292	0.012576776	-0.976607023
ENSG00000108375	RNF43	0.012587564	-0.967118961
ENSG00000133104	SPART	0.012649318	-0.942572696
ENSG00000102078	SLC25A14	0.012653221	-0.878354929
ENSG00000258659	TRIM34	0.0126302	-0.896040953
ENSG00000147799	ARHGAP39	0.012641544	-1.163895939
ENSG00000159596	TMEM69	0.012626259	-0.855164102
ENSG00000282608	ADORA3	0.012648026	-1.067453304
ENSG00000172590	MRPL52	0.012668884	-1.043399849
ENSG00000160695	VPS11	0.012662164	-0.940916359
ENSG00000118705	RPN2	0.012679692	-1.067102681
ENSG00000286070		0.012787496	-1.097760258
ENSG00000160182	TFF1	0.012795633	-1.574060267
ENSG00000136897	MRPL50	0.012784524	-0.94101305
ENSG00000159069	FBXW5	0.012722026	-1.128491191
ENSG00000134825	TMEM258	0.012789988	-1.08257881
ENSG00000132481	TRIM47	0.012738312	-0.839250526
ENSG00000166794	PPIB	0.012784663	-1.337552394
ENSG00000105723	GSK3A	0.012759253	-0.92523212
ENSG00000173511	VEGFB	0.012725511	-1.089054258
ENSG00000103226	NOMO3	0.01278496	-0.974322112
ENSG00000148444	COMMD3	0.012788056	-0.999307355
ENSG00000163320	CGGBP1	0.012797567	-0.853559859
ENSG00000135709	KIAA0513	0.012696175	-1.034307269
ENSG00000285437	POLR2J3	0.01274284	-0.836914402
ENSG00000174456	C12orf76	0.012749297	-0.897421376
ENSG00000204711	CFAP95	0.012811186	-1.241048467
ENSG00000116096	SPR	0.012815935	-1.000879166
ENSG00000104946	TBC1D17	0.01283018	-0.997140649
ENSG00000277429	SERF1B	0.013066143	-0.835242456
ENSG00000276657	PYCR3	0.012999461	-0.857860559
ENSG00000285226	PAK1IP1	0.012950238	-0.829270465
ENSG00000146109	ABT1	0.012902865	-0.963056841
ENSG00000149658	YTHDF1	0.013008005	-0.911202091
ENSG00000285248	IPO4	0.013051861	-0.817843327
ENSG00000286905		0.012959267	-0.876688268
ENSG00000100804	PSMB5	0.013024618	-1.128724727
ENSG00000166902	MRPL16	0.013071543	-0.903194476
ENSG00000184076	UQCR10	0.012877962	-1.128783061
ENSG00000083307	GRHL2	0.012893575	-1.054190689
ENSG00000174586	ZNF497	0.012951174	-0.937023102
ENSG00000196497	IPO4	0.013051861	-0.817843327
ENSG00000157856	DRC1	0.013066863	-1.109059366
ENSG00000164040	PGRMC2	0.012878044	-0.967061153
ENSG00000111845	PAK1IP1	0.012950238	-0.829270465
ENSG00000167646	DNAAF3	0.012988167	-1.113587718
ENSG00000104872	PIH1D1	0.01296142	-0.989282973
ENSG00000166526	ZNF3	0.012891266	-0.875185898
ENSG00000132004	FBXW9	0.012944962	-1.106066595
ENSG00000158411	MITD1	0.012989582	-0.911576604
ENSG00000139192	TAPBPL	0.012971159	-1.079429242
ENSG00000165325	DEUP1	0.012923816	-0.954655004
ENSG00000160584	SIK3	0.013062489	-0.985361016
ENSG00000121350	PYROXD1	0.012908938	-0.839728011
ENSG00000183751	TBL3	0.012904837	-0.95299403
ENSG00000214872	SMTNL1	0.012944053	-1.471584219
ENSG00000168280	KIF5C	0.012868386	-0.907547108
ENSG00000105185	PDCD5	0.013007131	-0.958032842
ENSG00000155368	DBI	0.012941967	-1.198295677
ENSG00000111203	ITFG2	0.013022474	-0.874497188
ENSG00000119844	AFTPH	0.013051704	-1.071735859
ENSG00000243970	PPIEL	0.013057919	-0.909528779
ENSG00000196169	KIF19	0.013078852	-1.236601171
ENSG00000159733	ZFYVE28	0.013092817	-0.829047311
ENSG00000214046	SMIM7	0.0130944	-1.00976989
ENSG00000183617	MRPL54	0.013112288	-1.066660036
ENSG00000118246	FASTKD2	0.01310673	-0.917214187
ENSG00000070501	POLB	0.013121638	-0.885130231
ENSG00000125967	NECAB3	0.013163888	-0.863902263
ENSG00000135829	DHX9	0.013131851	-0.96248929
ENSG00000288620		0.013162195	-1.011585084
ENSG00000105968	H2AZ2	0.013145518	-0.992666287
ENSG00000155749	FLACC1	0.01315807	-0.956645242
ENSG00000160710	ADAR	0.013136811	-0.699232665
ENSG00000236493	EIF2S2P3	0.013172436	-1.180813338
ENSG00000033100	CHPF2	0.013180924	-1.036584939
ENSG00000136143	SUCLA2	0.013194464	-0.860872444
ENSG00000086504	MRPL28	0.013207309	-1.090974944
ENSG00000166959	MS4A8	0.013235596	-1.341729804
ENSG00000175931	UBE2O	0.013255707	-0.838412112
ENSG00000165819	METTL3	0.013280161	-0.882999249
ENSG00000123737	EXOSC9	0.013282113	-0.847147355
ENSG00000144589	STK11IP	0.013284748	-0.91018969
ENSG00000103152	MPG	0.013276171	-1.049028053
ENSG00000197483	ZNF628	0.013295308	-0.881667259
ENSG00000102390	PBDC1	0.013333097	-0.968528506
ENSG00000125995	ROMO1	0.013359077	-1.153143048
ENSG00000111727	HCFC2	0.013322179	-0.849109705
ENSG00000010361	FUZ	0.013320104	-1.04205403
ENSG00000106344	RBM28	0.013342447	-0.821264227
ENSG00000150990	DHX37	0.013349625	-0.868469103
ENSG00000142252	GEMIN7	0.013359918	-0.870842456
ENSG00000167842	MIS12	0.013341687	-0.842861087
ENSG00000118960	HS1BP3	0.013405926	-0.876061046
ENSG00000128739	SNRPN	0.013421834	-1.109683034
ENSG00000189157	FAM47E	0.013416317	-1.05155626
ENSG00000068796	KIF2A	0.013417294	-0.991950739
ENSG00000204334	ERICH2	0.013414644	-1.08375379
ENSG00000132581	SDF2	0.013433032	-1.019057815
ENSG00000259956	RBM15B	0.013462538	-1.02183515
ENSG00000144895	EIF2A	0.013460582	-0.923559793
ENSG00000160767	FAM189B	0.013454407	-0.839824466
ENSG00000225553	PHF1	0.013564694	-0.960429105
ENSG00000241253	CFB	0.013540967	-1.426506079
ENSG00000236222	WDR46	0.013908555	-0.81537218
ENSG00000282854	ASAP3	0.013759247	-0.806334922
ENSG00000197586	ENTPD6	0.013732191	-0.942040702
ENSG00000204272	NBDY	0.013717225	-0.879062055
ENSG00000214455	RCN1P2	0.013775628	-0.962873147
ENSG00000168734	PKIG	0.013554758	-1.198656387
ENSG00000172766	NAA16	0.013672927	-0.851757317
ENSG00000089006	SNX5	0.013790409	-0.892565209
ENSG00000103599	IQCH	0.013565732	-0.817645456
ENSG00000129562	DAD1	0.013732776	-1.065590217
ENSG00000142188	TMEM50B	0.013564439	-0.917047933
ENSG00000172301	COPRS	0.013900231	-1.092502204
ENSG00000156469	MTERF3	0.013623596	-0.833661724
ENSG00000188938	FAM120AOS	0.013557782	-0.938452991
ENSG00000255974	CYP2A6	0.013830324	-1.438119161
ENSG00000162869	PPP1R21	0.013830809	-0.933076267
ENSG00000177943	MAMDC4	0.013639586	-1.056320083
ENSG00000106605	BLVRA	0.0135494	-0.990198996
ENSG00000171928	TVP23B	0.013602058	-0.965256415
ENSG00000077684	JADE1	0.01388234	-0.86633254
ENSG00000175768	TOMM5	0.013591263	-1.018088866
ENSG00000198799	LRIG2	0.013545286	-0.820163394
ENSG00000117899	MESD	0.013842826	-0.865261781
ENSG00000261052	SULT1A3	0.013666444	-0.90991451
ENSG00000121058	COIL	0.013716416	-0.825343041
ENSG00000126461	SCAF1	0.013903695	-0.822629061
ENSG00000198242	RPL23A	0.013929115	-1.3274715
ENSG00000104980	TIMM44	0.013881079	-0.875619397
ENSG00000141294	LRRC46	0.013719549	-1.24293972
ENSG00000213619	NDUFS3	0.013833018	-1.02407782
ENSG00000182768	NGRN	0.013617762	-1.226069488
ENSG00000181472	ZBTB2	0.01358451	-0.877988112
ENSG00000105792	CFAP69	0.013673669	-1.085275493
ENSG00000183060	LYSMD4	0.013926537	-0.913955472
ENSG00000165732	DDX21	0.013734153	-1.070152611
ENSG00000055950	MRPL43	0.013796113	-1.070710563
ENSG00000125089	SH3TC1	0.013864391	-0.829804823
ENSG00000166340	TPP1	0.013932971	-1.145721274
ENSG00000173113	TRMT112	0.013838985	-1.123147203
ENSG00000248643	RBM14-RBM4	0.013834429	-1.006093975
ENSG00000188283	ZNF383	0.013910254	-0.83526334
ENSG00000242485	MRPL20	0.013770103	-1.096447344
ENSG00000231738	TSPAN19	0.013660146	-1.129935565
ENSG00000106263	EIF3B	0.013835082	-1.028871075
ENSG00000164896	FASTK	0.013653713	-1.08980904
ENSG00000197043	ANXA6	0.013777496	-0.991752218
ENSG00000149922	TBX6	0.013895601	-0.892406471
ENSG00000083838	ZNF446	0.013563166	-0.95209558
ENSG00000180096	SEPTIN1	0.013485585	-1.009509809
ENSG00000132780	NASP	0.013740734	-0.941099403
ENSG00000115286	NDUFS7	0.013661186	-1.146996749
ENSG00000065060	UHRF1BP1	0.013714882	-0.887517633
ENSG00000176953	NFATC2IP	0.013730925	-0.807229666
ENSG00000095139	ARCN1	0.013862784	-1.145031241
ENSG00000102904	TSNAXIP1	0.013554297	-1.055974228
ENSG00000211450	SELENOH	0.01386478	-1.179421626
ENSG00000158545	ZC3H18	0.013828183	-0.816404418
ENSG00000141101	NOB1	0.013912915	-0.847500514
ENSG00000171823	FBXL14	0.013716468	-0.876248418
ENSG00000136457	CHAD	0.013713667	-1.417863922
ENSG00000130758	MAP3K10	0.013666611	-0.811584364
ENSG00000170854	RIOX2	0.01386216	-0.855835226
ENSG00000183155	RABIF	0.013679909	-0.906911659
ENSG00000186501	TMEM222	0.013761059	-1.025114171
ENSG00000134255	CEPT1	0.013496822	-0.955561666
ENSG00000188959	C9orf152	0.01395697	-0.880769193
ENSG00000131203	IDO1	0.013963728	-1.844999818
ENSG00000204950	LRRC10B	0.013985595	-1.386727023
ENSG00000149541	B3GAT3	0.013998351	-0.971165036
ENSG00000172059	KLF11	0.014025	-0.822324475
ENSG00000143933	CALM2	0.01402065	-1.39997742
ENSG00000278759	TBCD	0.014366165	-0.938851948
ENSG00000254017	IGHEP2	0.014395166	-1.455526476
ENSG00000101278	RPS10P5	0.014346701	-1.032492056
ENSG00000171953	ATPAF2	0.014172664	-0.851211139
ENSG00000160256	SLX9	0.014312065	-0.935186312
ENSG00000130560	UBAC1	0.014210991	-1.010251698
ENSG00000162571	TTLL10	0.014470374	-0.991895816
ENSG00000138587	MNS1	0.014414454	-0.96931177
ENSG00000081059	TCF7	0.014498886	-0.815034229
ENSG00000171169	NAIF1	0.014140185	-0.856853014
ENSG00000113272	THG1L	0.014257485	-0.811261724
ENSG00000184990	SIVA1	0.014098115	-1.091672241
ENSG00000288649	ACTL10	0.014471728	-0.840660756
ENSG00000165152	PGAP4	0.014268639	-0.94930104
ENSG00000140319	SRP14	0.014425421	-1.180063338
ENSG00000145050	MANF	0.014469518	-1.094479353
ENSG00000100564	PIGH	0.014149065	-0.845141588
ENSG00000135185	TMEM243	0.014283993	-0.837332521
ENSG00000135686	KLHL36	0.014498734	-0.850647942
ENSG00000168589	DYNLRB2	0.014133083	-1.150106179
ENSG00000182552	RWDD4	0.01448769	-0.857383087
ENSG00000167397	VKORC1	0.014204858	-0.924990982
ENSG00000131044	TTLL9	0.014366048	-1.15443958
ENSG00000100445	SDR39U1	0.014369668	-0.961471132
ENSG00000173486	FKBP2	0.014450695	-1.16529499
ENSG00000213145	CRIP1	0.014270278	-0.727175999
ENSG00000137275	RIPK1	0.014175085	-1.070524133
ENSG00000115274	INO80B	0.014434311	-1.014792311
ENSG00000115282	TTC31	0.014354705	-0.801861317
ENSG00000125458	NT5C	0.014492784	-0.978411228
ENSG00000134809	TIMM10	0.014365944	-0.944242783
ENSG00000163312	HELQ	0.014209831	-0.832959958
ENSG00000178035	IMPDH2	0.014413101	-1.162839284
ENSG00000141580	WDR45B	0.014193786	-0.953199319
ENSG00000064961	HMG20B	0.01434355	-1.005359327
ENSG00000087995	METTL2A	0.014154509	-0.881683766
ENSG00000109501	WFS1	0.014312685	-0.971627456
ENSG00000146859	TMEM140	0.014267783	-1.324078572
ENSG00000258315	C17orf49	0.014259361	-1.039539743
ENSG00000167543	TP53I13	0.014099385	-0.946561455
ENSG00000138760	SCARB2	0.014162105	-0.78321999
ENSG00000212123	PRR22	0.014409033	-0.906395272
ENSG00000143457	GOLPH3L	0.014311855	-0.882284093
ENSG00000171148	TADA3	0.014087844	-1.106270844
ENSG00000149196	HIKESHI	0.014417252	-0.887875602
ENSG00000072134	EPN2	0.014346883	-0.826037316
ENSG00000138381	ASNSD1	0.0144007	-0.883155766
ENSG00000013441	CLK1	0.014493162	-1.116182148
ENSG00000138496	PARP9	0.014276066	-0.84276652
ENSG00000154429	CCSAP	0.014289036	-0.806484702
ENSG00000168894	RNF181	0.0144059	-1.003324221
ENSG00000189266	PNRC2	0.014396749	-0.907914543
ENSG00000157014	TATDN2	0.014255019	-0.97154741
ENSG00000163006	CCDC138	0.01426019	-0.921406139
ENSG00000117475	BLZF1	0.014259081	-0.910684854
ENSG00000085449	WDFY1	0.01415735	-0.809449758
ENSG00000134684	YARS1	0.014113628	-1.048178602
[truncated: 2,750 more rows]
