# Supplementary material for: Upper Airway Epithelial Tissue Transcriptome Analysis Reveals Immune Signatures Associated with COVID-19 Severity in Ghanaians
Source: J Immunol Res. 2024 Feb 12;2024:6668017. doi: 10.1155/2024/6668017 (PMC10876312; doi:10.1155/2024/6668017)
Supplement: Supplementary 6 — Up infected-Ghanaians vs Indians. [file 6668017.f6.txt]

target_id	ext_gene	pval	qval	b	se_b	mean_obs	var_obs	tech_var	sigma_sq	smooth_sigma_sq	final_sigma_sq
ENSG00000251705	RNA5-8SP6	7.38E-41	7.43E-38	7.10535553	0.53083592	4.63586947	12.7429532	0.00345265	3.16664855	0.98433037	3.16664855
ENSG00000282230	ADAM9	4.71E-60	1.90E-56	6.00259383	0.36723903	3.80879819	8.36185309	0.14350352	1.37372216	0.87427516	1.37372216
ENSG00000281991	TMEM265	4.12E-66	2.21E-62	5.51734142	0.32125084	4.00588261	6.945784	0.03326139	1.12776227	0.89915332	1.12776227
ENSG00000215328	HSPA1A	1.22E-18	1.55E-16	5.08634848	0.57712191	5.56051736	8.61654345	0.37523932	3.37179479	1.06116796	3.37179479
ENSG00000227739	TUBB	3.13E-08	3.78E-07	5.07101708	0.91629421	3.56406579	14.188677	0.08558885	9.35985571	0.86073633	9.35985571
ENSG00000223618	VPS52	3.78E-54	6.77E-51	4.86548016	0.31401334	3.11980928	5.27443495	0.24577365	0.52787408	0.86352559	0.86352559
ENSG00000282937	PRSS22	6.10E-37	4.91E-34	4.43342334	0.34915462	5.6663455	5.096052	0.04664933	1.32482635	1.064457	1.32482635
ENSG00000228253	MT-ATP8	1.44E-47	1.78E-44	4.35725626	0.30074214	7.01311353	4.33545685	0.00441113	0.72322733	1.01310451	1.01310451
ENSG00000181649	PHLDA2	1.27E-30	6.81E-28	4.28076051	0.37212983	3.96381154	5.02565833	0.35445087	1.20345599	0.89324327	1.20345599
ENSG00000162078	ZG16B	5.79E-42	6.23E-39	4.26952291	0.31456137	5.00418377	4.53122239	0.0873666	0.98621667	1.02580805	1.02580805
ENSG00000278817		2.56E-20	4.39E-18	4.2628421	0.46154657	5.01500834	5.82088088	0.13381363	2.26272026	1.02688973	2.26272026
ENSG00000126709	IFI6	3.46E-12	1.24E-10	4.19192108	0.60250727	7.97472465	7.36533165	0.00221993	4.08169889	0.88642928	4.08169889
ENSG00000187608	ISG15	1.38E-10	3.34E-09	4.1772542	0.65090294	7.70506252	8.01278038	0.01104616	4.75529349	0.92805962	4.75529349
ENSG00000233493	TMEM238	1.12E-39	1.06E-36	4.16206657	0.31575229	4.50911591	3.86313163	0.15397213	0.41573972	0.96764734	0.96764734
ENSG00000184709	LRRC26	8.46E-30	4.40E-27	4.11503635	0.36292704	4.22459106	4.68554001	0.05106251	1.4307429	0.92734031	1.4307429
ENSG00000182853	VMO1	8.24E-38	6.99E-35	4.08070963	0.31748228	7.45474287	4.28993029	0.00608928	1.12785448	0.96271791	1.12785448
ENSG00000267303		6.90E-22	1.46E-19	4.01757892	0.41783977	4.4920515	5.00856953	0.15226425	1.81187408	0.96515878	1.81187408
ENSG00000173432	SAA1	9.39E-19	1.22E-16	3.89052951	0.43999651	6.21151439	5.0271944	0.06452901	2.11343643	1.06369015	2.11343643
ENSG00000148346	LCN2	1.18E-27	5.60E-25	3.87402489	0.35549125	8.49125555	4.25931913	0.00070572	1.42100211	0.79648623	1.42100211
ENSG00000188290	HES4	2.85E-35	2.08E-32	3.86802515	0.31210923	5.88844006	3.85591664	0.02828733	0.99207255	1.0675996	1.0675996
ENSG00000142089	IFITM3	6.22E-20	9.87E-18	3.77816807	0.41334311	7.11121453	4.61135599	0.00425507	1.91783581	1.00318619	1.91783581
ENSG00000197766	CFD	1.97E-18	2.46E-16	3.74971694	0.4281028	4.94721687	4.70786829	0.1402469	1.92156321	1.01983983	1.92156321
ENSG00000178934	LGALS7B	2.38E-11	7.21E-10	3.73786976	0.55951358	2.94483306	6.12627068	0.17975989	3.34211388	0.87797379	3.34211388
ENSG00000256870	SLC5A8	3.61E-12	1.29E-10	3.7328877	0.53697637	5.00652679	5.84587768	0.41772679	2.82613897	1.02604375	2.82613897
ENSG00000274616	CNOT3	2.85E-23	6.66E-21	3.72595519	0.37492871	4.08785144	4.20175892	0.17944996	1.40197984	0.91065378	1.40197984
ENSG00000235030	IER3	7.33E-21	1.28E-18	3.72340666	0.39742367	4.61241308	4.39028401	0.06170461	1.71518312	0.98156694	1.71518312
ENSG00000237155	IER3	7.33E-21	1.28E-18	3.72340666	0.39742367	4.61241308	4.39028401	0.06170461	1.71518312	0.98156694	1.71518312
ENSG00000230128	IER3	7.33E-21	1.28E-18	3.72340666	0.39742367	4.61241308	4.39028401	0.06170461	1.71518312	0.98156694	1.71518312
ENSG00000227231	IER3	7.33E-21	1.28E-18	3.72340666	0.39742367	4.61241308	4.39028401	0.06170461	1.71518312	0.98156694	1.71518312
ENSG00000185883	ATP6V0C	1.57E-34	1.10E-31	3.71937181	0.30348115	6.81620146	3.22224559	0.00546308	0.58907252	1.03067104	1.03067104
ENSG00000241253	CFB	5.24E-20	8.53E-18	3.71870835	0.40601952	4.2033092	4.45999556	0.05208972	1.80249357	0.92492532	1.80249357
ENSG00000143546	S100A8	5.92E-09	8.91E-08	3.71780314	0.63892017	6.82660085	7.15018754	0.00773958	4.584724	1.02982347	4.584724
ENSG00000108691	CCL2	3.50E-07	3.18E-06	3.71490701	0.72926314	4.55839385	8.51307865	0.05718741	5.92584072	0.9745835	5.92584072
ENSG00000130513	GDF15	1.84E-18	2.32E-16	3.70916016	0.42310351	6.01017345	4.60312454	0.01502603	1.99891054	1.06728167	1.99891054
ENSG00000102109	PCSK1N	4.01E-25	1.29E-22	3.69994456	0.35734446	3.31757075	4.02252393	0.05684084	1.3797286	0.85720686	1.3797286
ENSG00000198788	MUC2	1.74E-19	2.50E-17	3.68920582	0.40860793	7.3204839	4.4416421	0.14181514	1.73648984	0.97956003	1.73648984
ENSG00000197353	LYPD2	1.19E-26	4.56E-24	3.6671244	0.34318249	7.88582368	3.86670249	0.04517627	1.27978376	0.90061041	1.27978376
ENSG00000278845	MRPL45	1.14E-12	4.65E-11	3.64949739	0.51307204	3.42661608	5.45089588	0.64989367	2.31158919	0.85747081	2.31158919
ENSG00000277114	CNOT3	2.93E-22	6.37E-20	3.61477328	0.37253923	4.08770325	4.02638335	0.21630772	1.34502894	0.91063353	1.34502894
ENSG00000124102	PI3	1.06E-32	7.09E-30	3.59626768	0.30196601	6.91292571	3.45074606	0.0033742	0.99828405	1.02243988	1.02243988
ENSG00000283992	SLURP2	2.51E-31	1.50E-28	3.59607045	0.30888115	5.16631225	3.52093759	0.01811655	1.05521859	1.03966209	1.05521859
ENSG00000237724	HSPA1A	2.03E-08	2.61E-07	3.57330472	0.63705383	5.74489195	6.92296144	0.23705424	4.32861862	1.0661515	4.32861862
ENSG00000281981	TRBC1	1.33E-09	2.37E-08	3.55550279	0.58634154	2.58356038	6.21262968	0.21472084	3.65298865	0.92147196	3.65298865
ENSG00000282521	CCL15-CCL14	1.14E-08	1.55E-07	3.52936762	0.61824287	2.46307498	6.6023088	0.12675585	4.17326686	0.93497811	4.17326686
ENSG00000257704	INAFM1	4.09E-31	2.35E-28	3.51136068	0.30268657	4.46569163	2.93465457	0.06945846	0.52426592	0.96125711	0.96125711
ENSG00000125148	MT2A	4.54E-21	8.82E-19	3.46587224	0.367955	7.81695494	3.78780669	0.00277822	1.52036924	0.91129371	1.52036924
ENSG00000275214	IFI27	6.48E-18	7.73E-16	3.45473205	0.40060529	8.11908229	4.05062546	0.00944848	1.79600324	0.86251961	1.79600324
ENSG00000225972	MTND1P23	1.39E-11	4.44E-10	3.4518963	0.51075453	6.54468308	5.15708751	0.05933549	2.87545412	1.04952158	2.87545412
ENSG00000165215	CLDN3	3.35E-16	2.95E-14	3.44956252	0.42274062	6.28810502	4.24537629	0.00564282	2.00484052	1.06133123	2.00484052
ENSG00000254405	MSH5-SAPCD1	2.13E-09	3.61E-08	3.44725492	0.57575145	4.59001823	5.93198594	0.2678015	3.46145794	0.97876711	3.46145794
ENSG00000236428	PPP1R18	2.58E-08	3.19E-07	3.44606961	0.61889625	3.44696818	6.50045686	0.53090359	3.77821283	0.85776525	3.77821283
ENSG00000172216	CEBPB	1.24E-27	5.72E-25	3.44381396	0.31614235	6.83443078	3.36674781	0.04639479	1.07799758	1.02917933	1.07799758
ENSG00000160932	LY6E	5.03E-31	2.80E-28	3.42077342	0.29532967	7.91264361	3.03122152	0.08484299	0.72891646	0.89637768	0.89637768
ENSG00000243509	TNFRSF6B	3.53E-14	1.96E-12	3.41972609	0.45130895	3.40155963	4.48244867	0.26232005	2.02907733	0.85720887	2.02907733
ENSG00000196754	S100A2	1.89E-11	5.80E-10	3.40341137	0.50686372	6.71131729	5.04992231	0.01943506	2.87081176	1.03870746	2.87081176
ENSG00000163220	S100A9	7.29E-11	1.89E-09	3.40094511	0.5220518	7.92159348	5.21954925	0.00210141	3.06395196	0.89495638	3.06395196
ENSG00000140274	DUOXA2	7.29E-12	2.47E-10	3.39890698	0.4960503	5.94930597	4.92414232	0.01401234	2.75422904	1.06761619	2.75422904
ENSG00000255071	SAA2-SAA4	1.13E-08	1.55E-07	3.38939145	0.5936617	4.075078	6.08818701	0.17321728	3.79166757	0.90889678	3.79166757
ENSG00000160182	TFF1	2.62E-13	1.25E-11	3.37239259	0.46118036	5.70547916	4.52076418	0.00800176	2.38473065	1.06538246	2.38473065
ENSG00000241794	SPRR2A	5.65E-09	8.56E-08	3.35166299	0.5752136	4.65164469	5.801214	0.02622394	3.69607127	0.98608341	3.69607127
ENSG00000148965	SAA4	1.71E-08	2.24E-07	3.34170203	0.592638	3.35405843	6.01354842	0.2146061	3.7366166	0.85703483	3.7366166
ENSG00000163993	S100P	1.25E-25	4.19E-23	3.33120967	0.31831553	7.88895768	3.23652866	0.00099951	1.1389042	0.90011786	1.1389042
ENSG00000268903		3.59E-11	1.02E-09	3.32726499	0.50261242	2.10299346	4.90473471	0.31394414	2.5280224	0.95971799	2.5280224
ENSG00000166920	C15orf48	3.41E-15	2.47E-13	3.31572307	0.42104097	6.05031214	4.05686411	0.01067751	1.98367186	1.06686951	1.98367186
ENSG00000185885	IFITM1	1.45E-12	5.78E-11	3.31563317	0.46838174	7.69493137	4.52241377	0.00580016	2.46224122	0.9295403	2.46224122
ENSG00000130303	BST2	8.08E-20	1.25E-17	3.31107528	0.3633717	7.19052799	3.55070616	0.01313316	1.47230554	0.99461996	1.47230554
ENSG00000101439	CST3	2.29E-27	9.70E-25	3.29280872	0.30383676	7.9402876	3.08840386	0.03094422	1.00761954	0.8919735	1.00761954
ENSG00000281948	CES1P1	0.00053947	0.00179731	3.29090914	0.95103332	3.09330809	12.0678209	0.38579492	9.78942924	0.86518205	9.78942924
ENSG00000160472	TMEM190	4.90E-13	2.21E-11	3.27251762	0.45275914	7.06169208	4.30910086	0.00182276	2.30432415	1.00828787	2.30432415
ENSG00000228691	NEU1	1.56E-26	5.72E-24	3.26425166	0.30620609	3.74218198	3.06868437	0.10539036	0.94943404	0.8687393	0.94943404
ENSG00000227129	NEU1	1.56E-26	5.72E-24	3.26425166	0.30620609	3.74218198	3.06868437	0.10539036	0.94943404	0.8687393	0.94943404
ENSG00000108244	KRT23	9.19E-25	2.80E-22	3.25906868	0.31720342	4.26226778	3.13805845	0.13966269	0.99228991	0.93196245	0.99228991
ENSG00000102265	TIMP1	1.58E-24	4.47E-22	3.24919934	0.31786333	6.2837378	3.08314321	0.07518703	1.01336239	1.06148031	1.06148031
ENSG00000101443	WFDC2	1.74E-13	8.66E-12	3.24326731	0.44022331	8.85734322	4.14895875	0.11346025	2.06675111	0.72672687	2.06675111
ENSG00000160213	CSTB	3.43E-24	8.92E-22	3.23243994	0.31857462	9.00068716	3.11473904	0.00113604	1.14062411	0.69849019	1.14062411
ENSG00000233913	RPL10P9	3.62E-12	1.29E-10	3.22786502	0.4643433	3.78177067	4.37124765	0.10311329	2.32255214	0.87177759	2.32255214
ENSG00000184494	NEU1	3.67E-27	1.44E-24	3.22702607	0.29896495	3.75058933	2.97414525	0.11143153	0.89409391	0.86931807	0.89409391
ENSG00000234343	NEU1	3.67E-27	1.44E-24	3.22702607	0.29896495	3.75058933	2.97414525	0.11143153	0.89409391	0.86931807	0.89409391
ENSG00000223957	NEU1	3.67E-27	1.44E-24	3.22702607	0.29896495	3.75058933	2.97414525	0.11143153	0.89409391	0.86931807	0.89409391
ENSG00000178473	UCN3	9.15E-13	3.81E-11	3.2269328	0.45178188	4.47034973	4.24283141	0.02619949	2.27000277	0.96195056	2.27000277
ENSG00000206468	UBD	6.23E-07	5.27E-06	3.20627545	0.64333019	4.21822459	6.53737102	0.19772978	4.45834977	0.92660199	4.45834977
ENSG00000178531	CTXN1	3.59E-13	1.66E-11	3.19735971	0.43979817	6.48363844	4.08844259	0.00330355	2.17269877	1.05287014	2.17269877
ENSG00000135404	CD63	1.71E-24	4.76E-22	3.19340932	0.31264297	8.05268115	3.02550815	0.021093	1.0785453	0.87364844	1.0785453
ENSG00000127774	EMC6	1.14E-18	1.47E-16	3.19212975	0.36191587	4.86094444	3.39153404	0.0147691	1.45879071	1.01015671	1.45879071
ENSG00000284976		2.13E-22	4.71E-20	3.17390001	0.32601985	4.71202451	2.39669006	0.20288821	0.28118505	0.99286236	0.99286236
ENSG00000275183	LENG9	1.15E-10	2.83E-09	3.16875645	0.49162213	3.17417256	4.58755395	0.42216247	2.2968761	0.86079543	2.2968761
ENSG00000162366	PDZK1IP1	5.20E-25	1.64E-22	3.16661322	0.30656944	5.13819789	2.9279752	0.01970628	1.01377381	1.03762299	1.03762299
ENSG00000183971	NPW	1.19E-24	3.43E-22	3.1579325	0.30810958	2.61419029	2.95142139	0.05931202	1.00866752	0.91774399	1.00866752
ENSG00000179085	DPM3	3.44E-20	5.77E-18	3.15631142	0.34291267	5.45896874	3.20004713	0.01482476	1.30805258	1.056973	1.30805258
ENSG00000189143	CLDN4	7.33E-26	2.51E-23	3.15553379	0.3000831	7.73351867	2.89454601	0.00227328	1.01078771	0.92386706	1.01078771
ENSG00000128228	SDF2L1	3.89E-23	8.95E-21	3.13603632	0.31655391	4.88571607	2.98347976	0.02302437	1.10429741	1.01299423	1.10429741
ENSG00000283149		2.25E-18	2.79E-16	3.12993385	0.35794663	3.51247346	3.28495838	0.32181675	1.11959839	0.85917522	1.11959839
ENSG00000134339	SAA2	2.20E-08	2.79E-07	3.12562585	0.55861399	6.17020518	5.31389231	0.00982702	3.50073084	1.06473645	3.50073084
ENSG00000125730	C3	2.45E-19	3.47E-17	3.11974754	0.34699152	7.62728743	3.18741205	0.05050366	1.30403139	0.93926245	1.30403139
ENSG00000221869	CEBPD	2.16E-15	1.64E-13	3.09945411	0.3907568	6.24397959	3.52042758	0.00380872	1.71396368	1.06275655	1.71396368
ENSG00000185499	MUC1	5.46E-24	1.35E-21	3.08994358	0.30589859	8.21218445	2.1393085	0.20614734	0.11811127	0.84655959	0.84655959
ENSG00000288292	CLDN7	5.35E-24	1.35E-21	3.08722174	0.30556964	6.57508922	2.55685911	0.00271403	0.74955553	1.04773002	1.04773002
ENSG00000181885	CLDN7	5.35E-24	1.35E-21	3.08722174	0.30556964	6.57508922	2.55685911	0.00271403	0.74955553	1.04773002	1.04773002
ENSG00000135047	CTSL	1.04E-16	1.01E-14	3.08213543	0.37131896	7.1441582	3.33619118	0.0677828	1.48334208	0.99968675	1.48334208
ENSG00000256514		8.66E-19	1.14E-16	3.08082316	0.34806946	4.87029992	2.82656754	0.35173149	0.68255183	1.01123241	1.01123241
ENSG00000125534	PPDPF	2.10E-24	5.63E-22	3.08056761	0.30217613	6.8873255	2.52226461	0.00254823	0.72249097	1.02469394	1.02469394
ENSG00000130748	TMEM160	3.82E-20	6.34E-18	3.07847946	0.33486726	5.19590115	3.04721097	0.00962654	1.25190441	1.04174077	1.25190441
ENSG00000242335	CFB	1.04E-14	6.53E-13	3.07509393	0.39757456	5.04004161	3.55118709	0.01021254	1.76802467	1.02931669	1.76802467
ENSG00000243570	CFB	1.04E-14	6.53E-13	3.07509393	0.39757456	5.04004161	3.55118709	0.01021254	1.76802467	1.02931669	1.76802467
ENSG00000241534	CFB	1.16E-14	7.22E-13	3.07380573	0.39812072	5.03907546	3.55448284	0.01024505	1.77288113	1.02922506	1.77288113
ENSG00000225691	HLA-C	4.02E-05	0.00018844	3.07066352	0.74774076	6.65639044	7.98134431	0.15315966	6.13689814	1.04253988	6.13689814
ENSG00000277150	F8A3	2.16E-14	1.25E-12	3.05184115	0.39942105	3.44126129	3.54029696	0.07441233	1.72038092	0.85767549	1.72038092
ENSG00000288709	F8A2	2.16E-14	1.25E-12	3.05184115	0.39942105	3.44126129	3.54029696	0.07441233	1.72038092	0.85767549	1.72038092
ENSG00000278763	FAM27B	7.21E-16	5.82E-14	3.04058237	0.37692184	2.72262737	3.33404344	0.05497415	1.54331421	0.90414761	1.54331421
ENSG00000189377	CXCL17	1.92E-11	5.88E-10	3.03908795	0.45278165	7.36913389	4.02839745	0.00133195	2.30504433	0.97360455	2.30504433
ENSG00000184897	H1-10	1.18E-23	2.88E-21	3.03769461	0.30300411	6.84429021	2.44634292	0.00451837	0.69416889	1.02836093	1.02836093
ENSG00000224774	CSNK2B	1.26E-07	1.29E-06	3.03547338	0.57442341	4.10587023	5.40608439	0.06325749	3.64881785	0.91309081	3.64881785
ENSG00000125968	ID1	4.55E-14	2.49E-12	3.02046906	0.40036474	5.9017746	3.51231957	0.00744203	1.79584209	1.06763332	1.79584209
ENSG00000198848	CES1	6.46E-16	5.31E-14	3.00710574	0.3721538	6.70705285	3.25593973	0.24820686	1.3099007	1.03901434	1.3099007
ENSG00000273628		3.90E-21	7.66E-19	3.00164442	0.31812765	2.76867201	2.60406596	0.24018895	0.66117075	0.8983696	0.8983696
ENSG00000124939	SCGB2A1	3.20E-13	1.50E-11	2.9988659	0.41160309	5.43190213	3.5884428	0.02045841	1.88548405	1.05568967	1.88548405
ENSG00000170458	CD14	8.33E-15	5.35E-13	2.99785396	0.38620074	6.04308583	3.36315646	0.13397048	1.54397844	1.06695493	1.54397844
ENSG00000277377	SERPINA1	2.55E-09	4.21E-08	2.99055877	0.50190965	5.02131231	4.49130755	0.3120978	2.52192678	1.02751096	2.52192678
ENSG00000240972	MIF	1.93E-13	9.50E-12	2.99049194	0.40668485	6.63083758	3.53437077	0.0030862	1.85758022	1.04423351	1.85758022
ENSG00000110492	MDK	3.54E-21	7.05E-19	2.98849541	0.31639889	7.33088512	2.36044697	0.14791685	0.52090112	0.97830107	0.97830107
ENSG00000141933	TPGS1	5.05E-21	9.46E-19	2.98619053	0.31740219	5.56357916	2.33030472	0.07209276	0.56873435	1.0612789	1.0612789
ENSG00000051523	CYBA	8.82E-22	1.85E-19	2.98489052	0.31125583	7.92745034	2.77028817	0.04512229	1.04477984	0.89402389	1.04477984
ENSG00000284874		3.07E-06	2.10E-05	2.98153683	0.63900912	3.8399711	6.21092598	0.29469704	4.2990454	0.8775262	4.2990454
ENSG00000105404	RABAC1	2.47E-16	2.28E-14	2.9811874	0.36370565	5.90640102	3.15759328	0.00439573	1.48377448	1.06764107	1.48377448
ENSG00000282105	RPL41P2	2.42E-20	4.20E-18	2.97518074	0.32192297	2.39454746	2.76370469	0.22446909	0.86996103	0.94141793	0.94141793
ENSG00000260092		1.25E-11	4.01E-10	2.95555226	0.4362575	1.65402995	3.77044409	0.33715031	1.80395655	0.97077847	1.80395655
ENSG00000166823	MESP1	3.90E-22	8.37E-20	2.95401876	0.30536176	3.29930382	2.69513459	0.0452222	1.00379313	0.8573986	1.00379313
ENSG00000184292	TACSTD2	3.90E-28	1.97E-25	2.94697387	0.26795269	8.50968951	1.96843884	0.01466177	0.30319207	0.79307298	0.79307298
ENSG00000163221	S100A12	8.61E-06	5.01E-05	2.94234402	0.66127373	3.08869985	6.48682607	0.199492	4.7199411	0.86549201	4.7199411
ENSG00000282076	KCNQ1	2.31E-10	5.15E-09	2.94202834	0.46409759	2.28793619	4.0324485	0.48589854	1.93720043	0.94924624	1.93720043
ENSG00000117410	ATP6V0B	1.04E-21	2.15E-19	2.93963282	0.30708019	6.67902436	2.31618424	0.01986295	0.6601139	1.04099226	1.04099226
ENSG00000277791	PSMB3	6.52E-14	3.48E-12	2.93801872	0.3918814	5.55325615	3.34431493	0.1593943	1.56827981	1.06090116	1.56827981
ENSG00000281013	NDUFA6	8.85E-13	3.73E-11	2.93491699	0.41063578	5.50891845	3.50729216	0.08991989	1.80707473	1.05916034	1.80707473
ENSG00000106211	HSPB1	1.30E-21	2.65E-19	2.92904042	0.30671032	7.70766401	2.67624317	0.00266299	1.05563825	0.92767839	1.05563825
ENSG00000280830	ADI1	9.84E-05	0.00041132	2.92794528	0.75181264	1.96152753	7.88563102	1.01416851	5.34458174	0.96537516	5.34458174
ENSG00000175793	SFN	1.37E-19	2.03E-17	2.92414286	0.3229517	6.30361096	2.59231063	0.11256257	0.8659193	1.06078772	1.06078772
ENSG00000203618	GP1BB	5.63E-10	1.11E-08	2.92213588	0.47126929	2.624969	4.08439321	0.36214148	2.1364244	0.91641417	2.1364244
ENSG00000089356	FXYD3	1.41E-18	1.79E-16	2.91462742	0.33134773	8.12072717	2.83403698	0.0742847	1.16086764	0.86224119	1.16086764
ENSG00000130202	NECTIN2	4.90E-21	9.28E-19	2.90930741	0.30912621	5.97877178	2.32354771	0.00754085	0.71433038	1.06749802	1.06749802
ENSG00000131188	PRR7	1.36E-17	1.47E-15	2.90479679	0.34021466	4.87355029	2.8889835	0.01558234	1.28656036	1.01160505	1.28656036
ENSG00000161798	AQP5	7.69E-11	1.98E-09	2.90098418	0.44585933	7.13503535	3.80317895	0.00125898	2.23513463	1.00066421	2.23513463
ENSG00000168140	VASN	1.34E-08	1.79E-07	2.89926747	0.51032311	2.46216372	4.48296728	0.96182808	1.96800573	0.93507076	1.96800573
ENSG00000259132		1.65E-14	9.93E-13	2.88423081	0.37579726	3.81787449	3.14804653	0.24866299	1.34010233	0.87518308	1.34010233
ENSG00000167656	LY6D	1.07E-08	1.47E-07	2.87833253	0.50323672	5.28457988	4.38047075	0.01366932	2.83536162	1.04754362	2.83536162
ENSG00000236271	FLOT1	6.06E-15	4.09E-13	2.87437714	0.36838328	5.2294396	3.07620877	0.09493201	1.43176322	1.04401171	1.43176322
ENSG00000133328	PLAAT2	5.59E-09	8.48E-08	2.8701397	0.4924136	5.88097274	4.25231477	0.0053533	2.72244713	1.06757334	2.72244713
ENSG00000261040	WFDC21P	4.71E-21	9.04E-19	2.8701166	0.30483222	7.03213517	2.59838481	0.00291259	1.04246757	1.01124081	1.04246757
ENSG00000138083	SIX3	1.47E-14	9.01E-13	2.86427563	0.37246291	5.77699701	3.09858077	0.00752929	1.55316765	1.06665517	1.55316765
ENSG00000125144	MT1G	1.61E-16	1.53E-14	2.86425074	0.34726278	4.56069625	2.89796871	0.02022661	1.3364271	0.97489616	1.3364271
ENSG00000142694	EVA1B	6.14E-20	9.87E-18	2.86017811	0.31286757	4.31337348	2.64241787	0.05080433	1.0504145	0.93881338	1.0504145
ENSG00000165949	IFI27	7.49E-11	1.94E-09	2.85668584	0.43878375	8.24066675	3.68532123	0.01792487	2.14805091	0.84159761	2.14805091
ENSG00000135480	KRT7	3.52E-21	7.05E-19	2.85575217	0.3023259	6.88647096	2.34267086	0.00349241	0.79771837	1.02476825	1.02476825
ENSG00000149131	SERPING1	1.95E-07	1.90E-06	2.84001142	0.54573733	6.84109894	4.83173394	0.00565954	3.34491929	1.02862672	3.34491929
ENSG00000284194	SCO2	7.56E-11	1.95E-09	2.83541573	0.43560273	5.66573336	3.63147471	0.00723111	2.12745348	1.06444126	2.12745348
ENSG00000221821	C6orf226	1.05E-17	1.16E-15	2.83416644	0.33076173	4.07757687	2.74154725	0.01902127	1.21176613	0.90924216	1.21176613
ENSG00000179862	CITED4	2.04E-19	2.91E-17	2.83370526	0.3144629	5.38729074	2.08313571	0.05905053	0.50248042	1.05342724	1.05342724
ENSG00000237973	MTCO1P12	4.62E-08	5.33E-07	2.82982455	0.51776889	5.8260075	4.49176565	0.07730487	2.93864719	1.06721686	2.93864719
ENSG00000167653	PSCA	9.63E-13	3.98E-11	2.82466704	0.39585185	7.97938806	3.2543519	0.00095857	1.76190166	0.88567363	1.76190166
ENSG00000165272	AQP3	8.21E-17	8.32E-15	2.82354057	0.33903193	8.03747067	2.79134526	0.00188006	1.29122477	0.87616674	1.29122477
ENSG00000164825	DEFB1	8.11E-06	4.78E-05	2.82064212	0.6321157	3.41325389	5.93601423	0.0663282	4.42883717	0.85731702	4.42883717
ENSG00000146674	IGFBP3	2.69E-19	3.74E-17	2.81537879	0.31349632	5.30112458	2.56545712	0.05709597	1.01515309	1.04855336	1.04855336
ENSG00000205076	LGALS7	0.00010107	0.00042117	2.8054816	0.72157076	2.91884284	7.25896899	0.09722221	5.76025178	0.88071275	5.76025178
ENSG00000129757	CDKN1C	6.25E-20	9.87E-18	2.79965829	0.30630964	4.02454885	2.52101543	0.15373941	0.89042329	0.9017985	0.9017985
ENSG00000206406	CSNK2B	1.29E-05	7.10E-05	2.78879121	0.63942702	3.99929422	6.00476133	0.0543486	4.54540415	0.89822105	4.54540415
ENSG00000282379	DTX2	1.04E-16	1.01E-14	2.78683596	0.33573601	5.58597501	2.01551204	0.20602288	0.33781496	1.06206215	1.06206215
ENSG00000124107	SLPI	3.57E-32	2.30E-29	2.78630472	0.23597831	9.51331769	2.01495571	0.03118724	0.51265896	0.59527757	0.59527757
ENSG00000273822	MUC4	9.91E-06	5.67E-05	2.78064222	0.62923239	7.0248047	5.85307158	0.23753213	4.21671868	1.01196245	4.21671868
ENSG00000169692	AGPAT2	6.77E-19	9.02E-17	2.78041984	0.31316054	6.14032426	2.06775989	0.03788803	0.56602698	1.06539409	1.06539409
ENSG00000006327	TNFRSF12A	3.50E-14	1.95E-12	2.77198028	0.36577702	4.84384299	2.94480355	0.01391176	1.49125754	1.00817996	1.49125754
ENSG00000205502	C2CD4B	3.82E-15	2.69E-13	2.76967851	0.3523431	3.22890999	2.83568022	0.07486742	1.32177127	0.8588419	1.32177127
ENSG00000166165	CKB	1.30E-19	1.93E-17	2.76947361	0.30565872	6.65337742	2.27757949	0.00831405	0.82082162	1.04274254	1.04274254
ENSG00000141574	SECTM1	9.58E-09	1.34E-07	2.76667942	0.48217341	5.28997619	4.0307424	0.0071953	2.6083307	1.04787553	2.6083307
ENSG00000183734	ASCL2	3.47E-15	2.49E-13	2.76044123	0.35062665	4.14620604	2.81259542	0.02421631	1.35884796	0.91831068	1.35884796
ENSG00000229802	SLC39A7	1.03E-17	1.16E-15	2.75779069	0.32179318	4.59756789	1.7168613	0.18521973	0.08605543	0.97972734	0.97972734
ENSG00000227402	SLC39A7	1.03E-17	1.16E-15	2.75779069	0.32179318	4.59756789	1.7168613	0.18521973	0.08605543	0.97972734	0.97972734
ENSG00000206288	SLC39A7	1.03E-17	1.16E-15	2.75779069	0.32179318	4.59756789	1.7168613	0.18521973	0.08605543	0.97972734	0.97972734
ENSG00000226614	SLC39A7	1.03E-17	1.16E-15	2.75779069	0.32179318	4.59756789	1.7168613	0.18521973	0.08605543	0.97972734	0.97972734
ENSG00000224399	SLC39A7	1.03E-17	1.16E-15	2.75779069	0.32179318	4.59756789	1.7168613	0.18521973	0.08605543	0.97972734	0.97972734
ENSG00000049860	HEXB	4.74E-18	5.78E-16	2.75585996	0.31824682	6.10518957	2.02365725	0.07335121	0.51207433	1.06606049	1.06606049
ENSG00000188483	IER5L	1.90E-17	2.00E-15	2.75467784	0.32409619	4.74662293	2.60856488	0.01486442	1.16681688	0.9968511	1.16681688
ENSG00000117984	CTSD	2.85E-24	7.52E-22	2.75198367	0.2707377	9.21215638	1.81707462	0.16840818	0.21101413	0.65620448	0.65620448
ENSG00000159335	PTMS	3.08E-12	1.13E-10	2.74944816	0.39424424	6.15562881	3.16035748	0.0031048	1.74546603	1.06506767	1.74546603
ENSG00000116260	QSOX1	7.37E-20	1.15E-17	2.74010104	0.30038176	7.03110024	2.1984122	0.00373555	0.77625739	1.01134295	1.01134295
ENSG00000151632	AKR1C2	6.71E-19	9.02E-17	2.73881455	0.30844128	6.13300305	2.36485764	0.00473777	0.94593754	1.06554249	1.06554249
ENSG00000160862	AZGP1	9.61E-20	1.47E-17	2.73240874	0.30048516	4.72707601	2.1481717	0.02118668	0.71586476	0.99459081	0.99459081
ENSG00000168528	SERINC2	8.66E-18	1.02E-15	2.72845176	0.31761466	6.55151606	2.18199998	0.08576345	0.68989081	1.04912611	1.04912611
ENSG00000160180	TFF3	4.10E-14	2.26E-12	2.72510827	0.36056643	6.90644576	2.85381761	0.12747341	1.3351183	1.02301553	1.3351183
ENSG00000168899	VAMP5	2.73E-11	8.04E-10	2.72199643	0.40868173	5.43029154	3.25991979	0.01299221	1.86599126	1.05561116	1.86599126
ENSG00000141753	IGFBP4	7.15E-11	1.86E-09	2.72064413	0.41743713	6.22468241	3.33850848	0.00460697	1.95574777	1.06332327	1.95574777
ENSG00000162551	ALPL	8.06E-10	1.52E-08	2.7200402	0.44272883	6.50172459	3.57847818	0.00563778	2.19946141	1.05191273	2.19946141
ENSG00000246705	H2AJ	2.58E-19	3.62E-17	2.71523765	0.30219104	6.8942443	2.15112147	0.00325347	0.75494252	1.02409008	1.02409008
ENSG00000124664	SPDEF	6.87E-17	7.00E-15	2.71445974	0.32511108	6.1388545	2.34232675	0.12366938	0.8298478	1.06542428	1.06542428
ENSG00000163191	S100A11	1.05E-17	1.16E-15	2.70228358	0.31537172	8.4415465	2.49234736	0.00083013	1.11808726	0.80562963	1.11808726
ENSG00000189058	APOD	5.17E-10	1.03E-08	2.69899021	0.43434374	5.16545208	3.47539353	0.02206144	2.10030153	1.03960062	2.10030153
ENSG00000262243	CES1	2.74E-15	2.04E-13	2.69835597	0.34147193	6.23298034	2.60483575	0.24870082	0.98875873	1.06308381	1.06308381
ENSG00000213145	CRIP1	1.66E-14	9.93E-13	2.69765476	0.3514951	8.4411684	2.75399462	0.00413588	1.38578815	0.80569883	1.38578815
ENSG00000105518	TMEM205	2.25E-13	1.09E-11	2.69749032	0.36786785	5.62324839	2.88408161	0.01947709	1.50294891	1.06325445	1.50294891
ENSG00000284554		2.42E-06	1.72E-05	2.69421059	0.57146039	2.28008511	4.99569703	0.82216415	2.85171438	0.94976203	2.85171438
ENSG00000146425	DYNLT1	1.12E-19	1.70E-17	2.68686382	0.29602271	7.66225976	2.34567171	0.00384273	0.98198851	0.93427192	0.98198851
ENSG00000224389	C4B	9.10E-13	3.81E-11	2.68640301	0.37606659	5.10404847	2.94015386	0.09158716	1.49945621	1.03497651	1.49945621
ENSG00000243449	C4orf48	6.68E-21	1.22E-18	2.68098483	0.28586171	3.64290216	2.27426583	0.05162049	0.86769482	0.86377758	0.86769482
ENSG00000171222	SCAND1	1.22E-10	2.98E-09	2.67928776	0.41625508	6.93579741	3.28502742	0.00254802	1.94672025	1.02038054	1.94672025
ENSG00000213204		8.95E-10	1.67E-08	2.67505457	0.43659749	5.25819633	3.47257452	0.17167759	1.97276777	1.04588538	1.97276777
ENSG00000179403	VWA1	3.03E-16	2.75E-14	2.67336937	0.32713702	5.5128418	1.90812541	0.14463755	0.41013369	1.05932206	1.05932206
ENSG00000169248	CXCL11	0.00095461	0.00293522	2.67253719	0.80898344	4.41490148	8.59972866	0.08525766	7.2773522	0.95364547	7.2773522
ENSG00000115457	IGFBP2	2.16E-16	2.01E-14	2.66877701	0.32494656	7.33730035	2.52583594	0.01381647	1.17407405	0.97752068	1.17407405
ENSG00000019102	VSIG2	5.69E-18	6.89E-16	2.66874536	0.3089301	6.0113767	2.09835104	0.00640379	0.74666416	1.06727152	1.06727152
ENSG00000171051	FPR1	3.51E-06	2.34E-05	2.66786473	0.57515827	5.67635715	5.01565242	0.02583673	3.69574246	1.06470897	3.69574246
ENSG00000163734	CXCL3	5.00E-10	1.00E-08	2.66624638	0.42871217	3.47312963	3.38814325	0.20092104	1.86676288	0.85824642	1.86676288
ENSG00000169245	CXCL10	0.00094693	0.00291661	2.66431673	0.80594277	5.73543466	8.53705695	0.11081619	7.19655095	1.06598203	7.19655095
ENSG00000185745	IFIT1	4.64E-07	4.04E-06	2.66149238	0.52799255	7.04308788	4.43375033	0.00534974	3.13088172	1.01015463	3.13088172
ENSG00000182154	MRPL41	2.63E-13	1.25E-11	2.65752831	0.36344229	5.8674304	2.80748399	0.00413993	1.48187589	1.06751219	1.48187589
ENSG00000167916	KRT24	2.24E-07	2.14E-06	2.65473368	0.51266978	4.69221225	4.25054905	0.089352	2.86748887	0.99060747	2.86748887
ENSG00000143819	EPHX1	3.52E-08	4.19E-07	2.64802075	0.48030982	7.47316305	3.8883947	0.00193668	2.59341041	0.96030898	2.59341041
ENSG00000130433	CACNG6	3.14E-10	6.64E-09	2.64627496	0.42058869	5.6562231	3.29161124	0.01007636	1.97999068	1.0641917	1.97999068
ENSG00000125775	SDCBP2	1.30E-17	1.40E-15	2.64193755	0.30921849	5.91577323	1.97796125	0.00803027	0.65018665	1.06765054	1.06765054
ENSG00000243749	TMEM35B	5.66E-11	1.52E-09	2.64084149	0.40302369	4.360407	3.12614109	0.06541016	1.7619059	0.9455484	1.7619059
ENSG00000118640	VAMP8	1.63E-19	2.37E-17	2.64047431	0.29222926	7.50149654	2.20224183	0.00416834	0.88369531	0.95655846	0.95655846
ENSG00000197956	S100A6	1.25E-12	5.08E-11	2.63861034	0.37167017	9.36575129	2.85527095	0.0014876	1.55257292	0.62518732	1.55257292
ENSG00000173486	FKBP2	1.51E-12	5.95E-11	2.63665511	0.37273134	5.99518947	2.86204042	0.00613733	1.55681	1.06739653	1.55681
ENSG00000149798	CDC42EP2	2.83E-10	6.09E-09	2.63528528	0.41778984	4.46220219	3.25459308	0.08757996	1.87608894	0.96073675	1.87608894
ENSG00000277768	CCL3L3	3.82E-05	0.00018025	2.63422249	0.63965492	3.82636616	5.84815355	0.07080804	4.53222417	0.87606192	4.53222417
ENSG00000145050	MANF	2.04E-13	9.98E-12	2.63241017	0.358329	5.69543754	2.74133217	0.01808782	1.42640849	1.06516026	1.42640849
ENSG00000069011	PITX1	1.10E-17	1.21E-15	2.62913918	0.30705275	5.44038328	1.93371452	0.00456656	0.6217259	1.05609912	1.05609912
ENSG00000197747	S100A10	1.44E-17	1.54E-15	2.62545343	0.30773644	6.29375294	1.97621499	0.00425848	0.66902376	1.06113582	1.06113582
ENSG00000228978	TNF	6.90E-06	4.16E-05	2.623453	0.58340351	1.90046697	5.07648917	0.42212076	3.40692532	0.96719328	3.40692532
ENSG00000137198	GMPR	6.34E-13	2.76E-11	2.62187316	0.36450322	4.98548716	2.78013233	0.00885135	1.48585288	1.02389768	1.48585288
ENSG00000167617	CDC42EP5	9.96E-06	5.69E-05	2.6176717	0.592492	2.81069103	5.18890382	0.84887683	3.10039934	0.89319316	3.10039934
ENSG00000185338	SOCS1	5.89E-07	5.00E-06	2.60999889	0.52253874	4.79800367	4.31862808	0.03484209	3.03693372	1.00284005	3.03693372
ENSG00000276452	LILRB1	4.34E-09	6.80E-08	2.60847553	0.44431261	2.54797686	3.48066205	0.51297938	1.70792466	0.92568205	1.70792466
ENSG00000230669	PSMB8	2.75E-10	5.94E-09	2.60617159	0.41288391	4.99982422	3.18042676	0.17332096	1.74450166	1.02536724	1.74450166
ENSG00000206298	PSMB8	2.75E-10	5.94E-09	2.60617159	0.41288391	4.99982422	3.18042676	0.17332096	1.74450166	1.02536724	1.74450166
ENSG00000236443	PSMB8	2.75E-10	5.94E-09	2.60617159	0.41288391	4.99982422	3.18042676	0.17332096	1.74450166	1.02536724	1.74450166
ENSG00000226201	PSMB8	2.75E-10	5.94E-09	2.60617159	0.41288391	4.99982422	3.18042676	0.17332096	1.74450166	1.02536724	1.74450166
ENSG00000283738		1.35E-15	1.05E-13	2.60358412	0.32584372	4.3275839	2.46675313	0.12326381	1.07119515	0.94081273	1.07119515
ENSG00000289281		8.69E-17	8.75E-15	2.60335611	0.31284807	1.34032588	2.25960499	0.13413832	0.84983124	0.96694324	0.96694324
ENSG00000117472	TSPAN1	3.98E-20	6.54E-18	2.60233218	0.28321013	8.93277008	1.94151743	0.19041954	0.4710121	0.71192024	0.71192024
ENSG00000171695	LKAAEAR1	6.04E-08	6.77E-07	2.602174	0.48031835	3.18420921	3.84258833	0.09987393	2.49556537	0.86037967	2.49556537
ENSG00000164713	BRI3	1.74E-17	1.85E-15	2.60119906	0.30566817	6.62245042	2.03001078	0.00634463	0.74624976	1.04477698	1.04477698
ENSG00000131981	LGALS3	1.27E-19	1.91E-17	2.59727787	0.28657102	7.74042179	2.16279999	0.00104058	0.89058633	0.92284258	0.92284258
ENSG00000163453	IGFBP7	1.32E-08	1.77E-07	2.59707499	0.45691834	7.05870387	3.59498741	0.001577	2.34713461	1.00858955	2.34713461
ENSG00000119147	ECRG4	1.81E-10	4.20E-09	2.59646929	0.40718001	5.1602224	3.1190711	0.01650866	1.84869135	1.03922565	1.84869135
ENSG00000219200	RNASEK	2.18E-10	4.90E-09	2.59147982	0.40823295	6.73483771	3.1236307	0.00217383	1.87268522	1.03698684	1.87268522
ENSG00000074842	MYDGF	3.59E-15	2.56E-13	2.59125335	0.32932121	5.27896967	2.47973581	0.00683864	1.21325155	1.04719593	1.21325155
ENSG00000239754	CFB	7.20E-11	1.87E-09	2.59046522	0.3975233	4.62949904	3.0271933	0.02794466	1.74983407	0.98359824	1.74983407
ENSG00000275736	OSCAR	2.81E-06	1.95E-05	2.58629675	0.55214298	2.71766104	4.64699731	0.20623482	3.22346119	0.90477425	3.22346119
ENSG00000105699	LSR	8.75E-17	8.76E-15	2.58202045	0.31031757	6.48319061	2.04487733	0.03044772	0.75655106	1.05289347	1.05289347
ENSG00000148926	ADM	6.06E-10	1.17E-08	2.58172084	0.41715631	4.74942259	3.19545891	0.02956106	1.92815701	0.99717601	1.92815701
ENSG00000163209	SPRR3	1.11E-06	8.72E-06	2.58147115	0.52990094	5.55089723	4.37607906	0.01050354	3.14844025	1.06081337	3.14844025
ENSG00000288191	MISP3	2.71E-11	8.03E-10	2.58046648	0.38735489	3.79319394	2.92907064	0.0994863	1.58850656	0.87279416	1.58850656
ENSG00000256079	FAM133GP	1.49E-09	2.62E-08	2.57954436	0.42666369	2.32215681	3.28204062	0.08011353	1.96785791	0.94692412	1.96785791
ENSG00000272710		6.01E-10	1.17E-08	2.57391422	0.41580468	1.99809003	3.17533329	0.09854537	1.84650682	0.9641071	1.84650682
ENSG00000171345	KRT19	6.79E-16	5.56E-14	2.57298408	0.3186681	8.39487193	2.3854023	0.00037146	1.14205882	0.81413116	1.14205882
ENSG00000159884	CCDC107	1.64E-14	9.92E-13	2.56917559	0.33470783	4.65346892	2.49756946	0.05027759	1.21005235	0.98628369	1.21005235
ENSG00000010278	CD9	5.35E-16	4.56E-14	2.56739087	0.31683451	7.51821924	2.36703317	0.04455552	1.08476566	0.95431941	1.08476566
ENSG00000108679	LGALS3BP	7.13E-15	4.67E-13	2.56455748	0.32954661	7.09354498	2.45513351	0.00562297	1.21613793	1.00502847	1.21613793
ENSG00000167642	SPINT2	6.34E-17	6.55E-15	2.56244928	0.30655782	6.73252208	2.10072478	0.02009072	0.84324748	1.03715835	1.03715835
ENSG00000249992	TMEM158	3.42E-14	1.91E-12	2.55991871	0.33765692	2.58796289	2.51044534	0.0907178	1.1919194	0.92094139	1.1919194
ENSG00000186395	KRT10	8.22E-14	4.33E-12	2.55824556	0.34262148	5.44239987	2.54616292	0.00602039	1.31461122	1.05619549	1.31461122
ENSG00000185262	UBALD2	1.46E-16	1.40E-14	2.55803491	0.3097059	5.60094504	1.89108228	0.01651681	0.63794871	1.06255781	1.06255781
ENSG00000170421	KRT8	9.11E-13	3.81E-11	2.55777875	0.35806796	8.18216675	2.66540462	0.01739712	1.42499531	0.85174941	1.42499531
ENSG00000158869	FCER1G	1.48E-06	1.12E-05	2.55501571	0.53076482	5.71037727	4.36030179	0.00729795	3.16195413	1.06548699	3.16195413
ENSG00000227097	RPS28P7	1.40E-16	1.35E-14	2.55297505	0.30889907	5.48020082	1.82583166	0.01552799	0.57757804	1.05793169	1.05793169
ENSG00000212864	RNF208	3.08E-17	3.21E-15	2.54983481	0.30199496	3.71645911	2.24834358	0.05945226	0.96655849	0.86720925	0.96655849
ENSG00000189334	S100A14	1.08E-17	1.19E-15	2.54883633	0.29758232	7.19901178	2.19271376	0.00257116	0.96783811	0.99367524	0.99367524
ENSG00000277196		7.26E-07	6.01E-06	2.54794633	0.51429814	4.80037003	4.16310633	0.05031703	2.92533694	1.00311644	2.92533694
ENSG00000134153	EMC7	5.94E-16	4.96E-14	2.54725425	0.31484431	4.98209603	2.33349154	0.00662375	1.10855432	1.02354579	1.10855432
ENSG00000114315	HES1	1.66E-15	1.27E-13	2.54690467	0.31977086	6.07604485	1.98788957	0.0838254	0.68013747	1.06652541	1.06652541
ENSG00000008952	SEC62	1.98E-16	1.87E-14	2.54674378	0.30969849	5.90217562	1.91934446	0.01138895	0.68300596	1.06763407	1.06763407
ENSG00000161677	JOSD2	2.33E-13	1.12E-11	2.54662329	0.34750047	5.07973004	2.57208781	0.0147313	1.34378019	1.0329265	1.34378019
ENSG00000172183	ISG20	5.00E-10	1.00E-08	2.54646453	0.40945853	6.87721801	3.09061261	0.01610651	1.87002669	1.025569	1.87002669
ENSG00000160113	NR2F6	1.41E-11	4.48E-10	2.54246898	0.37630004	6.02030188	2.79858971	0.00247505	1.59054429	1.06719201	1.59054429
ENSG00000119632	IFI27L2	7.04E-12	2.40E-10	2.54241532	0.37078382	4.50740153	2.75296138	0.16783553	1.37882171	0.96739896	1.37882171
ENSG00000108700	CCL8	0.00272383	0.00728541	2.54217112	0.84815398	2.97187815	9.18797305	0.09242836	8.00042987	0.87526004	8.00042987
ENSG00000167136	ENDOG	7.87E-14	4.16E-12	2.54189523	0.34016538	5.21876786	2.51171607	0.01109599	1.29066945	1.04329904	1.29066945
ENSG00000265303		1.72E-10	4.02E-09	2.54150185	0.39807148	1.53410967	2.98410331	0.27260918	1.51007598	0.9703962	1.51007598
ENSG00000213638	ADAT3	7.04E-18	8.35E-16	2.5350549	0.29428821	3.62403509	2.18319126	0.03152905	0.9427834	0.86298455	0.9427834
ENSG00000178719	GRINA	2.26E-16	2.09E-14	2.53485531	0.30884032	6.1176499	2.06240836	0.007214	0.84442934	1.06583739	1.06583739
ENSG00000104522	GFUS	7.22E-16	5.82E-14	2.53165248	0.3138415	5.4663419	1.77053074	0.05077474	0.50710613	1.05731073	1.05731073
ENSG00000175602	CCDC85B	2.52E-15	1.89E-13	2.5299188	0.31973059	5.08727974	1.78619932	0.11648424	0.45903744	1.03357686	1.03357686
ENSG00000165474	GJB2	5.07E-13	2.27E-11	2.52924458	0.35014872	4.59042674	2.57570039	0.02187734	1.3574191	0.97881948	1.3574191
ENSG00000123689	G0S2	0.0001882	0.00071581	2.52901949	0.6772322	5.42113797	6.29185037	0.01567457	5.14406425	1.05516043	5.14406425
ENSG00000132821	VSTM2L	5.45E-12	1.88E-10	2.52859703	0.36682263	4.95613921	2.70728691	0.00741206	1.50637492	1.02080202	1.50637492
ENSG00000276561	IRF7	7.79E-10	1.48E-08	2.518857	0.40962054	6.15136016	3.06541558	0.01932624	1.86829985	1.06516092	1.86829985
ENSG00000128422	KRT17	6.11E-15	4.10E-13	2.51190216	0.32197019	6.32768062	1.85727846	0.10632881	0.55911669	1.05990024	1.05990024
ENSG00000133321	PLAAT4	1.79E-14	1.06E-12	2.51143387	0.32766894	7.18520064	2.39006868	0.12648597	1.08139206	0.9952104	1.08139206
ENSG00000168701	TMEM208	8.89E-16	7.06E-14	2.51126037	0.31229794	5.55877108	1.66189374	0.03610829	0.43120909	1.06110427	1.06110427
ENSG00000089692	LAG3	6.98E-07	5.80E-06	2.51101045	0.50604916	5.10885749	4.03439246	0.04419728	2.83676743	1.0353661	2.83676743
ENSG00000278114	MUC20	1.89E-10	4.35E-09	2.51051349	0.39411773	5.30977587	2.91961289	0.04289812	1.70455073	1.04907202	1.70455073
ENSG00000275501	MUC20	1.89E-10	4.35E-09	2.51051349	0.39411773	5.30977587	2.91961289	0.04289812	1.70455073	1.04907202	1.70455073
ENSG00000276583	MUC20	1.89E-10	4.35E-09	2.51051349	0.39411773	5.30977587	2.91961289	0.04289812	1.70455073	1.04907202	1.70455073
ENSG00000127528	KLF2	7.03E-15	4.63E-13	2.5082906	0.32224224	5.64915602	2.28417776	0.10420049	0.99902138	1.06400021	1.06400021
ENSG00000185164	NOMO2	5.02E-16	4.33E-14	2.50748779	0.30914737	6.90813063	2.09257514	0.05231991	0.85677689	1.02286619	1.02286619
ENSG00000108342	CSF3	1.85E-06	1.36E-05	2.50747985	0.52580019	3.73222436	4.25640398	0.09919317	3.01104758	0.86810304	3.01104758
ENSG00000156381	ANKRD9	1.89E-16	1.79E-14	2.49972687	0.30376395	4.5824161	2.21194859	0.01257864	1.02548738	0.9777844	1.02548738
ENSG00000177697	CD151	9.96E-16	7.87E-14	2.49524033	0.31084297	5.87035808	1.86361491	0.01948584	0.66858755	1.06752689	1.06752689
ENSG00000175756	AURKAIP1	8.25E-15	5.34E-13	2.49389063	0.32122813	6.43892348	1.91716766	0.10574841	0.63810718	1.05511106	1.05511106
ENSG00000223953	C1QTNF5	1.71E-14	1.02E-12	2.49375671	0.32510116	3.5625936	2.35466067	0.04077238	1.14824875	0.86068675	1.14824875
ENSG00000198695	MT-ND6	2.45E-26	8.59E-24	2.49331114	0.23481371	9.57119814	1.71395226	0.03675596	0.50094108	0.58354068	0.58354068
ENSG00000110651	CD81	2.50E-16	2.29E-14	2.49058971	0.30390888	7.10408621	2.06152408	0.0351245	0.85876779	1.00393234	1.00393234
ENSG00000103024	NME3	5.13E-16	4.39E-14	2.48975918	0.30705707	5.34598055	1.76243057	0.00952337	0.58092095	1.05117214	1.05117214
ENSG00000172354	GNB2	1.22E-17	1.32E-15	2.48743395	0.29088227	7.55109189	2.0479638	0.00202703	0.88111828	0.9498635	0.9498635
ENSG00000102854	MSLN	2.16E-16	2.01E-14	2.48593988	0.3026789	6.89875757	2.14353777	0.00696929	0.97483909	1.02369404	1.02369404
ENSG00000262814	MRPL12	2.64E-12	9.73E-11	2.48319654	0.35495662	5.77663586	2.56918135	0.00395406	1.41348073	1.06665012	1.41348073
ENSG00000005486	RHBDD2	3.98E-15	2.78E-13	2.48285936	0.31606902	6.2658564	1.91322897	0.06179843	0.68869924	1.06207238	1.06207238
ENSG00000119986	AVPI1	3.30E-16	2.94E-14	2.48227727	0.30412815	5.05333293	1.92440057	0.0099969	0.75242558	1.0305598	1.0305598
ENSG00000123989	CHPF	4.11E-12	1.46E-10	2.48082192	0.3578105	5.53248441	2.58943004	0.00954427	1.43077472	1.0601094	1.43077472
ENSG00000275031	METRNL	6.76E-13	2.93E-11	2.47943244	0.34512637	5.55437938	2.48950936	0.05918458	1.28082781	1.06094277	1.28082781
ENSG00000136689	IL1RN	3.76E-08	4.43E-07	2.4770135	0.45020551	6.31837062	3.41148166	0.02418066	2.25602563	1.06024982	2.25602563
ENSG00000120055	C10orf95	7.35E-15	4.78E-13	2.47457958	0.31813692	5.81743542	1.95513467	0.07148954	0.72959795	1.06713535	1.06713535
ENSG00000171236	LRG1	1.49E-15	1.15E-13	2.47329013	0.31002824	5.88835612	1.99792902	0.01372268	0.83213449	1.06759933	1.06759933
ENSG00000163739	CXCL1	9.88E-15	6.32E-13	2.47097867	0.31921777	6.23343228	2.29117401	0.02611372	1.12026112	1.06307058	1.12026112
ENSG00000185825	BCAP31	7.73E-11	1.98E-09	2.47009073	0.37967257	6.36505037	2.75760784	0.00178248	1.61991917	1.05841716	1.61991917
ENSG00000267795	SMIM22	3.20E-16	2.87E-14	2.46591629	0.30199163	7.03543055	2.0563672	0.01507313	0.89729419	1.01091501	1.01091501
ENSG00000127948	POR	5.58E-16	4.71E-14	2.46206549	0.30402745	6.77457985	1.98923795	0.0058957	0.84186578	1.03397206	1.03397206
ENSG00000137440	FGFBP1	2.48E-10	5.47E-09	2.46000835	0.38873437	4.02301852	2.82513752	0.03194678	1.66809031	0.90158164	1.66809031
ENSG00000289694		7.92E-06	4.68E-05	2.45954362	0.55054622	6.14607925	4.50557175	0.21289306	3.19699473	1.06527391	3.19699473
ENSG00000204936	CD177	1.80E-07	1.77E-06	2.45869081	0.47110001	4.27311954	3.60713196	0.04402872	2.45274249	0.93336662	2.45274249
ENSG00000170889	RPS9	1.65E-13	8.22E-12	2.45757422	0.33324901	7.26725954	2.11931881	0.26348862	0.72088225	0.98587904	0.98587904
ENSG00000123131	PRDX4	3.20E-15	2.33E-13	2.45662554	0.31163821	5.4810307	1.65171429	0.0346134	0.47499507	1.0579683	1.0579683
ENSG00000187193	MT1X	8.59E-14	4.51E-12	2.45069477	0.32846961	6.59664064	2.33840923	0.00580877	1.20797942	1.04641072	1.20797942
ENSG00000133027	PEMT	7.68E-16	6.16E-14	2.45056644	0.30407015	4.31802871	1.62719376	0.10069539	0.389737	0.93946447	0.93946447
ENSG00000243279	PRAF2	9.26E-17	9.16E-15	2.44937209	0.2946097	4.25084047	1.53465628	0.04592499	0.35150957	0.93051735	0.93051735
ENSG00000105281	SLC1A5	8.49E-10	1.60E-08	2.44769677	0.39894256	6.50866846	2.90254175	0.00522397	1.78527162	1.05153737	1.78527162
ENSG00000164972	C9orf24	1.72E-07	1.70E-06	2.44746322	0.4681791	7.37650996	3.56628684	0.00211003	2.46379628	0.97268684	2.46379628
ENSG00000166592	RRAD	9.57E-09	1.34E-07	2.44547867	0.42618092	6.45570582	3.14903063	0.00192826	2.04141123	1.0542911	2.04141123
ENSG00000275302	CCL4	1.56E-06	1.17E-05	2.44539944	0.50912443	4.59629297	4.00691137	0.13945388	2.77663257	0.97956632	2.77663257
ENSG00000277983	NPIPA7	5.16E-06	3.25E-05	2.4453378	0.53649629	1.86868707	4.32337817	0.50747487	2.73059317	0.967992	2.73059317
ENSG00000159231	CBR3	1.68E-11	5.26E-10	2.44431176	0.36313444	4.73133454	2.59759143	0.01448437	1.46901511	0.99508188	1.46901511
ENSG00000186891	TNFRSF18	5.83E-15	3.95E-13	2.44255168	0.31284086	3.98686872	2.21996521	0.02601873	1.07501208	0.8964678	1.07501208
ENSG00000103260	METRN	1.24E-09	2.24E-08	2.43920579	0.40154164	5.42057942	2.9176388	0.00866748	1.80523397	1.05513268	1.80523397
ENSG00000108639	SYNGR2	1.64E-14	9.92E-13	2.43724071	0.31750968	6.94419733	2.1121617	0.11452595	0.88186956	1.01961349	1.01961349
ENSG00000130222	GADD45G	5.57E-16	4.71E-14	2.43710807	0.30094211	4.72620935	1.62875929	0.02437826	0.48040573	0.99449097	0.99449097
ENSG00000174276	ZNHIT2	3.92E-13	1.79E-11	2.43598169	0.3356203	4.97620013	2.37721727	0.01033127	1.25687981	1.02293023	1.25687981
ENSG00000274221	CCL3	5.44E-05	0.000245	2.4358171	0.60353199	4.38617905	5.1596991	0.25127209	3.84655017	0.9493528	3.84655017
ENSG00000166794	PPIB	2.73E-08	3.35E-07	2.43428484	0.43798679	7.31877228	3.2514452	0.00088584	2.15722901	0.97976646	2.15722901
ENSG00000157992	KRTCAP3	1.77E-14	1.05E-12	2.43405668	0.31751353	4.80496397	2.24464056	0.0161324	1.11803455	1.00365293	1.11803455
ENSG00000160201	U2AF1	3.43E-15	2.48E-13	2.43151503	0.3087914	6.30123471	1.83449056	0.01183901	0.70750508	1.06087244	1.06087244
ENSG00000119917	IFIT3	4.15E-06	2.70E-05	2.43088547	0.52803431	7.04318953	4.21031782	0.02632016	3.1104075	1.0101445	3.1104075
ENSG00000149043	SYT8	1.17E-10	2.88E-09	2.43032905	0.37722376	4.44350742	2.69995607	0.03004646	1.57080339	0.95793916	1.57080339
ENSG00000155287	SLC25A28	3.77E-15	2.66E-13	2.43018359	0.30909012	6.06239828	2.07029048	0.00807222	0.95239287	1.06671566	1.06671566
ENSG00000213689	TREX1	1.69E-09	2.94E-08	2.42909801	0.40313825	6.06067155	2.92246457	0.006824	1.82153103	1.06673848	1.82153103
ENSG00000101294	HM13	5.17E-15	3.54E-13	2.42894151	0.31049625	6.24063881	1.84317893	0.02173197	0.70887652	1.06285713	1.06285713
ENSG00000089280	FUS	6.23E-10	1.20E-08	2.42720188	0.3924628	6.47346616	2.82677758	0.00298702	1.72981731	1.05339573	1.72981731
ENSG00000114115	RBP1	4.66E-11	1.29E-09	2.42702347	0.36876386	5.25207598	2.62709935	0.02048291	1.50936845	1.04549235	1.50936845
ENSG00000230043	TMSB4XP6	3.17E-13	1.49E-11	2.42508138	0.33280654	1.12566385	2.34631354	0.13754782	1.10850438	0.95920486	1.10850438
ENSG00000261992	GATAD2B	4.32E-07	3.80E-06	2.42306051	0.47938785	4.26511883	3.66108552	0.73316265	1.85223038	0.93232844	1.85223038
ENSG00000104140	RHOV	4.41E-15	3.05E-13	2.42233814	0.30886906	6.03097826	1.79264509	0.00616404	0.67925298	1.06708701	1.06708701
ENSG00000168394	TAP1	1.13E-08	1.55E-07	2.42132253	0.42409217	7.62739652	3.10697252	0.07078266	1.95257678	0.93924701	1.95257678
ENSG00000188643	S100A16	2.24E-15	1.69E-13	2.42015289	0.30529503	6.5980277	1.94867166	0.0022325	0.84395376	1.04632441	1.04632441
ENSG00000166557	TMED3	9.93E-15	6.32E-13	2.41704612	0.31227323	6.31524501	1.75924891	0.03667355	0.61973897	1.0603654	1.0603654
ENSG00000126262	FFAR2	2.37E-06	1.69E-05	2.41342763	0.51146084	5.62047435	4.00366146	0.11893329	2.82397889	1.06317055	2.82397889
ENSG00000277751	LILRB2	1.56E-05	8.38E-05	2.41018595	0.5578295	3.83133423	4.54901833	0.09822772	3.40247698	0.87658878	3.40247698
ENSG00000130487	KLHDC7B	2.48E-11	7.44E-10	2.40887646	0.36089449	5.75989846	2.54686388	0.05542513	1.40982925	1.06640075	1.40982925
ENSG00000164054	SHISA5	1.39E-14	8.53E-13	2.40877896	0.31292948	7.30927363	2.18933733	0.05733189	1.0443228	0.98090815	1.0443228
ENSG00000167644	C19orf33	1.74E-15	1.33E-13	2.40709988	0.3024597	6.87043181	1.90707123	0.00301929	0.81307108	1.02615177	1.02615177
ENSG00000142544	CTU1	6.39E-17	6.55E-15	2.40700701	0.2879924	4.03938663	2.02198362	0.02389256	0.90917818	0.90389844	0.90917818
ENSG00000196352	CD55	6.12E-14	3.28E-12	2.40627218	0.32060121	7.21429207	2.24078712	0.00299283	1.15333993	0.99196	1.15333993
ENSG00000004809	SLC22A16	9.12E-08	9.79E-07	2.40607844	0.45029051	4.2181294	3.34628063	0.0638236	2.21724374	0.92659105	2.21724374
ENSG00000141552	ANAPC11	1.35E-11	4.32E-10	2.40602702	0.35575865	5.81673178	2.50354268	0.0037497	1.42009773	1.06712835	1.42009773
ENSG00000099797	TECR	2.95E-14	1.66E-12	2.4048009	0.31640236	6.18933472	1.79645842	0.06197092	0.64374527	1.06427168	1.06427168
ENSG00000073150	PANX2	6.38E-15	4.25E-13	2.40168671	0.30805842	5.43517215	1.79755653	0.01177658	0.69795999	1.05584832	1.05584832
ENSG00000179271	GADD45GIP1	2.86E-14	1.62E-12	2.40041982	0.31565718	6.26637456	1.79118452	0.05888826	0.64554647	1.06205564	1.06205564
ENSG00000185803	SLC52A2	1.20E-11	3.87E-10	2.40039312	0.35401194	5.12501633	2.48466841	0.05817625	1.35172385	1.03663502	1.35172385
ENSG00000263309	KRT23	6.98E-15	4.61E-13	2.39969554	0.30825153	5.44086801	1.98578164	0.01284148	0.89021984	1.05612232	1.05612232
ENSG00000186010	NDUFA13	1.10E-15	8.67E-14	2.39648975	0.29900936	7.11199124	1.89390287	0.00271957	0.80986119	1.00310465	1.00310465
ENSG00000226278	PSPHP1	3.43E-10	7.16E-09	2.39322052	0.38119884	2.69671532	2.69916728	0.0673588	1.56740748	0.90741918	1.56740748
ENSG00000118523	CCN2	1.46E-12	5.80E-11	2.39294742	0.33807285	7.05712568	2.35586554	0.00451566	1.28128342	1.0087486	1.28128342
ENSG00000182782	HCAR2	4.45E-08	5.17E-07	2.39278012	0.43729174	5.53586214	3.20651552	0.01338851	2.13788223	1.06024102	2.13788223
ENSG00000110619	CARS1	1.12E-11	3.66E-10	2.38835418	0.35176192	5.93295611	2.45611328	0.14014812	1.25188691	1.06764626	1.25188691
ENSG00000105289	TJP3	7.35E-15	4.78E-13	2.38790605	0.30699658	6.4896163	1.90999146	0.00772066	0.82919183	1.05255694	1.05255694
ENSG00000052344	PRSS8	8.31E-15	5.35E-13	2.38540299	0.30728719	5.41132525	1.66136168	0.00761723	0.57869623	1.05466871	1.05466871
ENSG00000006210	CX3CL1	4.74E-11	1.31E-09	2.38379421	0.36234325	6.70841271	2.53553024	0.00523408	1.47180803	1.03891665	1.47180803
ENSG00000213722	DDAH2	3.25E-10	6.83E-09	2.37809361	0.37828565	5.04958573	2.66093604	0.13841255	1.47146284	1.03021268	1.47146284
ENSG00000198435	NRARP	2.12E-13	1.04E-11	2.37707141	0.32380805	4.24689013	2.23700804	0.01778424	1.16179686	0.93002619	1.16179686
ENSG00000197696	NMB	8.64E-16	6.89E-14	2.37690095	0.29545732	3.86096941	2.04268917	0.03696157	0.94510751	0.87991222	0.94510751
ENSG00000204642	HLA-F	0.00039364	0.00136156	2.3767662	0.67058615	3.69363885	6.05036316	0.21846925	4.8404959	0.86608843	4.8404959
ENSG00000088002	SULT2B1	5.42E-15	3.70E-13	2.37456435	0.30377415	4.96977142	1.87729711	0.015882	0.8000969	1.02225378	1.02225378
ENSG00000173702	MUC13	1.68E-07	1.66E-06	2.37285523	0.45351629	4.48683049	3.34824972	0.00524832	2.30861826	0.96439085	2.30861826
ENSG00000110446	SLC15A3	6.92E-07	5.76E-06	2.37265771	0.47799877	6.3839646	3.60028758	0.01020658	2.56022515	1.05761791	2.56022515
ENSG00000173156	RHOD	7.06E-16	5.74E-14	2.37251678	0.29400844	4.40640618	1.49113554	0.02008868	0.40495604	0.95237215	0.95237215
ENSG00000128383	APOBEC3A	8.33E-05	0.00035547	2.37031972	0.60243034	4.75528045	5.08498277	0.06007232	4.02280368	0.99785661	4.02280368
ENSG00000151366	NDUFC2	1.95E-10	4.45E-09	2.36875148	0.37215529	6.14008627	2.60160215	0.00422199	1.55389804	1.06539899	1.55389804
ENSG00000132698	RAB25	1.84E-14	1.08E-12	2.36581948	0.3088087	6.00870517	1.6937612	0.0055378	0.63178143	1.06729386	1.06729386
ENSG00000122862	SRGN	6.46E-06	3.93E-05	2.36317628	0.52390759	6.63403698	4.100414	0.00517024	3.08272032	1.04402458	3.08272032
ENSG00000143256	PFDN2	1.62E-12	6.35E-11	2.36048207	0.33418178	5.15782207	2.29751094	0.01621805	1.24015341	1.03905283	1.24015341
ENSG00000162496	DHRS3	2.21E-14	1.28E-12	2.35753062	0.30867469	6.05850945	1.73843226	0.00513408	0.68522038	1.06676666	1.06676666
ENSG00000167105	TMEM92	1.28E-14	7.94E-13	2.35611569	0.30566459	3.92671622	1.94283112	0.16290858	0.73666251	0.88818837	0.88818837
ENSG00000175334	BANF1	2.29E-10	5.12E-09	2.35604331	0.37159137	6.14937692	2.58551479	0.00237461	1.55102705	1.06520366	1.55102705
ENSG00000118849	RARRES1	3.68E-11	1.05E-09	2.3555816	0.35602662	5.31683341	2.45985098	0.13982484	1.28616835	1.04949035	1.28616835
ENSG00000162040	HS3ST6	4.17E-09	6.57E-08	2.35520303	0.40074129	4.37298953	2.83374323	0.45374124	1.35293653	0.94739834	1.35293653
ENSG00000147684	NDUFB9	4.45E-07	3.89E-06	2.35461274	0.46638179	7.89364724	3.46269201	0.00207675	2.444933	0.89937982	2.444933
ENSG00000104883	PEX11G	2.52E-14	1.44E-12	2.35344612	0.30882143	4.39728805	2.11084471	0.02163339	1.0512867	0.95100842	1.0512867
ENSG00000123144	TRIR	1.57E-14	9.52E-13	2.35066836	0.30599529	6.84412995	1.78841707	0.02499827	0.72246962	1.0283743	1.0283743
ENSG00000164733	CTSB	5.94E-13	2.62E-11	2.34953599	0.32624032	8.23205047	2.2296773	0.00249205	1.19487636	0.84310249	1.19487636
ENSG00000176153	GPX2	1.69E-09	2.95E-08	2.34839631	0.38979646	6.13810087	2.73194991	0.00284026	1.70649915	1.06543968	1.70649915
ENSG00000285794		1.33E-13	6.75E-12	2.34662226	0.31698087	2.93981039	2.16120022	0.06929647	1.06106832	0.87849351	1.06106832
ENSG00000110057	UNC93B1	4.55E-09	7.10E-08	2.34219424	0.39950643	6.46873792	2.81116269	0.00165295	1.7939077	1.05363687	1.7939077
ENSG00000127324	TSPAN8	1.10E-09	2.01E-08	2.34117652	0.38415048	5.26282049	2.67716819	0.00705124	1.65312917	1.04618025	1.65312917
ENSG00000163435	ELF3	1.36E-14	8.37E-13	2.33955105	0.30381899	7.93985329	2.06451725	0.00078459	1.0376577	0.89204302	1.0376577
ENSG00000276613	MUC4	6.73E-06	4.07E-05	2.33947698	0.51966348	4.17995187	4.03018101	0.15236863	2.8856954	0.922345	2.8856954
ENSG00000177508	IRX3	3.93E-13	1.79E-11	2.33698313	0.32199053	5.6858566	1.90981654	0.10143798	0.78196566	1.06493841	1.06493841
ENSG00000105427	CNFN	4.35E-09	6.81E-08	2.33539976	0.39784415	3.69954487	2.79044427	0.05265086	1.72799874	0.86637291	1.72799874
ENSG00000111057	KRT18	4.12E-11	1.16E-09	2.3349559	0.35380274	7.99948701	2.42394579	0.11622658	1.29200768	0.88240371	1.29200768
ENSG00000233276	GPX1	4.81E-15	3.31E-13	2.33453422	0.29808126	7.25141172	1.97350168	0.01186959	0.9385362	0.98772034	0.98772034
ENSG00000232573	RPL3P4	0.00883915	0.02024854	2.33191515	0.8906513	4.45202586	9.80978896	0.18656275	8.73760933	0.95921562	8.73760933
ENSG00000189060	H1-0	1.08E-14	6.75E-13	2.33069701	0.30151666	6.93053486	2.01791051	0.00190516	0.99714741	1.02085816	1.02085816
ENSG00000170144	HNRNPA3	2.02E-06	1.47E-05	2.33068927	0.49057096	8.33707616	3.69731913	0.00234087	2.70508264	0.82454061	2.70508264
ENSG00000118804	STBD1	1.05E-11	3.45E-10	2.33060483	0.34277855	3.90977728	2.33514776	0.2663354	1.05550737	0.885958	1.05550737
ENSG00000164647	STEAP1	2.40E-14	1.38E-12	2.33027286	0.30552568	4.35058554	1.74043518	0.10602545	0.61115119	0.94411637	0.94411637
ENSG00000243056	EIF4EBP3	1.32E-13	6.71E-12	2.32948836	0.31462085	4.70126043	2.12943817	0.02671597	1.08687967	0.99163412	1.08687967
ENSG00000198643	FAM3D	4.56E-14	2.49E-12	2.32939944	0.30877688	5.93590276	1.83880747	0.00496789	0.81306652	1.06764271	1.06764271
ENSG00000169469	SPRR1B	4.57E-05	0.0002104	2.32920426	0.5713861	3.8786	4.64513505	0.22308872	3.4498346	0.8820223	3.4498346
ENSG00000082515	MRPL22	6.12E-09	9.11E-08	2.32917796	0.40064563	6.26903308	2.8096496	0.01223488	1.79358046	1.06196935	1.79358046
ENSG00000167157	PRRX2	1.19E-13	6.13E-12	2.32913975	0.31400684	3.95099567	2.12485978	0.1586521	0.95060121	0.89147464	0.95060121
ENSG00000278603		8.42E-12	2.82E-10	2.32823982	0.340821	1.1305787	2.31824749	0.1903921	1.11639617	0.95942631	1.11639617
ENSG00000167969	ECI1	6.91E-14	3.67E-12	2.32508495	0.31044656	5.84161055	1.60415684	0.01689471	0.56633854	1.06734727	1.06734727
ENSG00000167799	NUDT8	5.89E-12	2.02E-10	2.32495324	0.33781201	4.00965761	2.2927483	0.03868597	1.2451298	0.89968801	1.2451298
ENSG00000177674	AGTRAP	1.91E-10	4.38E-09	2.32346836	0.36486437	5.86010527	2.50165942	0.0033357	1.49433193	1.06747184	1.49433193
ENSG00000005075	POLR2J	2.16E-13	1.05E-11	2.32294958	0.31653202	5.73248068	1.65684985	0.06123869	0.57752122	1.06592714	1.06592714
ENSG00000090971	NAT14	1.94E-10	4.43E-09	2.32210186	0.36475618	5.39816611	2.49957592	0.00962985	1.48714968	1.05399549	1.48714968
ENSG00000065054	SLC9A3R2	2.90E-09	4.74E-08	2.32131482	0.39098434	6.16211135	2.71809345	0.00301955	1.7167539	1.06492282	1.7167539
ENSG00000002587	HS3ST1	3.58E-15	2.56E-13	2.31957507	0.29478445	4.18674765	1.46555299	0.05448837	0.39271518	0.92311271	0.92311271
ENSG00000278032	LY6E	1.90E-13	9.34E-12	2.31864832	0.31520584	6.85267443	1.44963965	0.09008199	0.3417676	1.0276586	1.0276586
ENSG00000174021	GNG5	4.94E-14	2.67E-12	2.31725358	0.30759526	6.67764229	1.96764813	0.02332893	0.93671449	1.04108804	1.04108804
ENSG00000231631	PSMB8	1.86E-09	3.20E-08	2.31706813	0.38554971	5.45123814	2.66766528	0.14054818	1.53174834	1.05661342	1.53174834
ENSG00000204618	RNF39	2.85E-06	1.97E-05	2.31677501	0.49492683	3.11583096	3.73246309	0.38150343	2.37421294	0.86376025	2.37421294
ENSG00000130724	CHMP2A	3.31E-08	3.96E-07	2.31362814	0.41880138	7.00557793	2.96042067	0.00119753	1.97199168	1.01383485	1.97199168
ENSG00000134873	CLDN10	9.39E-11	2.36E-09	2.31344572	0.35720945	4.93537468	2.43166835	0.0147462	1.42073798	1.01854914	1.42073798
ENSG00000174886	NDUFA11	4.53E-14	2.49E-12	2.31226218	0.3064707	6.51861351	1.68936547	0.00565601	0.67578888	1.05099228	1.05099228
ENSG00000170412	GPRC5C	3.47E-09	5.56E-08	2.31042652	0.39107655	6.148765	2.70927478	0.00816927	1.71241549	1.06521677	1.71241549
ENSG00000148344	PTGES	9.34E-10	1.73E-08	2.30515749	0.37664358	5.38711405	2.58209495	0.00665553	1.58927383	1.05341792	1.58927383
ENSG00000206408	GPANK1	5.63E-07	4.81E-06	2.30480999	0.46064415	2.72581231	3.35962087	0.10122588	2.28594574	0.90374594	2.28594574
ENSG00000228605	GPANK1	5.63E-07	4.81E-06	2.30480999	0.46064415	2.72581231	3.35962087	0.10122588	2.28594574	0.90374594	2.28594574
ENSG00000106992	AK1	1.67E-12	6.52E-11	2.30404582	0.32637143	5.61040701	1.72327687	0.1354715	0.58782643	1.06285949	1.06285949
ENSG00000161921	CXCL16	4.57E-08	5.28E-07	2.29843351	0.4204019	6.2278382	2.96191269	0.00640101	1.98189876	1.06323295	1.98189876
ENSG00000205155	PSENEN	2.81E-07	2.61E-06	2.29803779	0.4474677	7.39973399	3.22134471	0.00116807	2.2513895	0.9697722	2.2513895
ENSG00000163121	NEURL3	6.49E-10	1.25E-08	2.29511885	0.37149803	5.03283067	2.53071533	0.01594457	1.53667674	1.02862874	1.53667674
ENSG00000178896	EXOSC4	4.64E-11	1.29E-09	2.29364563	0.34846858	5.05419117	2.34605796	0.008511	1.35758044	1.03063893	1.35758044
ENSG00000141526	SLC16A3	2.40E-13	1.15E-11	2.29280722	0.31303492	6.97443678	2.08609986	0.00666847	1.0957287	1.01680464	1.0957287
ENSG00000164687	FABP5	3.13E-09	5.10E-08	2.29261178	0.38697841	5.97839346	2.6583753	0.0043901	1.68032315	1.06750006	1.68032315
ENSG00000198355	PIM3	9.21E-14	4.80E-12	2.29203125	0.30758056	6.30901314	1.91255452	0.00372213	0.92282762	1.06059316	1.06059316
ENSG00000007080	CCDC124	2.97E-13	1.40E-11	2.29148805	0.3140855	5.51358623	1.50390607	0.05045654	0.46088201	1.05935258	1.05935258
ENSG00000205364	MT1M	3.49E-13	1.62E-11	2.29011882	0.31482943	2.76881231	2.09621121	0.11765208	0.99742057	0.89835212	0.99742057
ENSG00000128311	TST	1.55E-13	7.76E-12	2.29007401	0.31017853	5.60131578	1.55553554	0.0198008	0.545314	1.0625698	1.0625698
ENSG00000183336	BOLA2	7.98E-09	1.15E-07	2.28881297	0.39675376	4.48257775	2.73978509	0.11436507	1.65653735	0.96376337	1.65653735
ENSG00000286190		1.42E-08	1.89E-07	2.28776287	0.40340852	4.74613088	2.7977583	0.0345568	1.79625055	0.99679402	1.79625055
ENSG00000139410	SDSL	8.67E-12	2.89E-10	2.28774679	0.33510012	3.75138901	2.23984191	0.02230538	1.24098061	0.86937506	1.24098061
ENSG00000112378	PERP	7.52E-12	2.54E-10	2.2864733	0.33391924	7.86055096	2.229994	0.00333916	1.25105901	0.90456218	1.25105901
ENSG00000071553	ATP6AP1	1.56E-08	2.06E-07	2.28502081	0.40410028	6.73848091	2.80154525	0.00252865	1.83456305	1.03671609	1.83456305
ENSG00000126062	TMEM115	9.58E-11	2.40E-09	2.28479944	0.35294678	5.58357919	2.37307335	0.00979483	1.39163374	1.06198074	1.39163374
ENSG00000117450	PRDX1	5.61E-09	8.51E-08	2.28190417	0.39155242	8.87560119	2.6884178	0.1279956	1.59677897	0.72315398	1.59677897
ENSG00000068697	LAPTM4A	1.76E-09	3.05E-08	2.28107765	0.37900815	6.23281169	2.58079798	0.00249914	1.61353163	1.06308874	1.61353163
ENSG00000223551	TMSB4XP4	1.57E-11	4.92E-10	2.28045343	0.33828253	1.86282003	2.25718891	0.13705316	1.15034137	0.96812846	1.15034137
ENSG00000136156	ITM2B	9.58E-10	1.78E-08	2.27791414	0.3724394	7.86584202	2.52345832	0.0214116	1.53908834	0.90373782	1.53908834
ENSG00000112695	COX7A2	6.53E-14	3.48E-12	2.27767885	0.30381604	7.00529323	1.80051845	0.02455972	0.80074378	1.01386235	1.01386235
ENSG00000188396	DYNLT4	1.32E-07	1.34E-06	2.27748542	0.43163801	6.02847169	3.04951262	0.00518728	2.09081567	1.06711263	2.09081567
ENSG00000173467	AGR3	1.17E-08	1.59E-07	2.2768438	0.39915857	6.0034221	2.75053277	0.00537569	1.78705939	1.06733605	1.78705939
ENSG00000100300	TSPO	1.04E-08	1.43E-07	2.27584807	0.39759029	6.4080546	2.73584953	0.00197423	1.77640374	1.05655281	1.77640374
ENSG00000153789	CIBAR2	2.30E-13	1.12E-11	2.27560768	0.31045896	7.04286941	2.05335508	0.01885633	1.06547227	1.01017638	1.06547227
ENSG00000185507	IRF7	4.41E-08	5.12E-07	2.27503522	0.41562486	5.59932396	2.89734003	0.04006259	1.90330771	1.06250522	1.90330771
ENSG00000275313	CCL4L2	2.44E-05	0.00012296	2.27418345	0.53885287	3.23816583	4.19738085	0.08678223	3.17979499	0.85858562	3.17979499
ENSG00000107281	NPDC1	3.53E-13	1.64E-11	2.27340163	0.31259798	4.1176142	2.0661807	0.03074439	1.06857747	0.91464776	1.06857747
ENSG00000172270	BSG	2.59E-14	1.48E-12	2.27151292	0.29821349	7.85790772	1.13091166	0.09550352	0.05408897	0.90497341	0.90497341
ENSG00000237276	ANO7L1	1.58E-09	2.76E-08	2.27118022	0.37626192	3.77710651	2.54926824	0.03985543	1.55284122	0.8713797	1.55284122
ENSG00000204267	TAP2	3.41E-08	4.07E-07	2.27021172	0.41135791	6.56025662	2.85413459	0.06726554	1.83640691	1.0486142	1.83640691
ENSG00000288859	H2AC19	1.28E-08	1.72E-07	2.26906049	0.39884539	6.42076635	2.74102227	0.29217005	1.49745348	1.05596955	1.49745348
ENSG00000174156	GSTA3	1.31E-10	3.16E-09	2.26883998	0.35304443	4.0373773	2.35997857	0.04107138	1.36113282	0.90361449	1.36113282
ENSG00000165948	IFI27L1	3.66E-15	2.60E-13	2.26870714	0.28842226	3.96821481	1.81223674	0.04200297	0.8031325	0.89385531	0.89385531
ENSG00000166710	B2M	2.53E-16	2.31E-14	2.26866736	0.27687757	9.9507213	1.82921195	0.13036672	0.73207164	0.50704083	0.73207164
ENSG00000117308	GALE	2.13E-12	8.09E-11	2.26543509	0.32244396	5.77676277	1.62866706	0.10301179	0.55826665	1.0666519	1.0666519
ENSG00000284841	H2AW	2.56E-15	1.91E-13	2.26412661	0.2862134	3.99586627	1.85997259	0.02384212	0.87387948	0.89773661	0.89773661
ENSG00000170270	GON7	3.09E-08	3.75E-07	2.26366355	0.40888858	4.94847258	2.82607341	0.14134479	1.73954122	1.0199758	1.73954122
ENSG00000164897	TMUB1	2.43E-12	9.07E-11	2.26341989	0.3229978	5.0969339	2.1306488	0.00933112	1.16435416	1.03439037	1.16435416
ENSG00000129194	SOX15	1.33E-14	8.27E-13	2.26289889	0.2937899	4.36846947	1.5800428	0.02428368	0.5897598	0.94673197	0.94673197
ENSG00000171223	JUNB	4.91E-13	2.21E-11	2.26266336	0.31304859	7.29335461	1.96240667	0.11968666	0.88351993	0.98280681	0.98280681
ENSG00000161328	LRRC56	2.32E-06	1.66E-05	2.26141157	0.47881321	4.59740887	3.51060708	0.28390406	2.2952945	0.97970728	2.2952945
ENSG00000269313	MAGIX	1.25E-13	6.39E-12	2.26104178	0.30509039	5.0620213	1.68307596	0.01579743	0.70468525	1.03135421	1.03135421
ENSG00000109881	CCDC34	1.06E-09	1.96E-08	2.26093594	0.37067795	5.46587613	2.49428813	0.01105606	1.53471803	1.05728954	1.53471803
ENSG00000101421	CHMP4B	5.27E-14	2.83E-12	2.25747992	0.29999073	7.14476834	1.84769312	0.0128163	0.8782435	0.99962115	0.99962115
ENSG00000085871	MGST2	4.79E-10	9.68E-09	2.25614598	0.36237586	5.71343025	2.42285678	0.00538689	1.47192104	1.06555087	1.47192104
ENSG00000225969	ABHD11-AS1	1.49E-13	7.51E-12	2.25515955	0.30523294	4.05974387	1.67807875	0.1413681	0.57918396	0.90676231	0.90676231
ENSG00000174775	HRAS	8.48E-11	2.15E-09	2.25375793	0.3471663	5.30407881	2.30145296	0.04016181	1.31573811	1.0487312	1.31573811
ENSG00000099795	NDUFB7	6.36E-09	9.44E-08	2.25162934	0.3877493	6.3651364	2.62946948	0.00194577	1.68948628	1.0584136	1.68948628
ENSG00000169429	CXCL8	0.00023167	0.0008553	2.25110663	0.61142893	6.82057853	5.10073297	0.01583632	4.18992373	1.03031541	4.18992373
ENSG00000143771	CNIH4	1.49E-12	5.89E-11	2.2503867	0.31805134	4.93627797	2.08436307	0.00984232	1.12817005	1.01864811	1.12817005
ENSG00000276023	DUSP14	7.99E-12	2.69E-10	2.25000604	0.32901288	4.86648994	2.04861677	0.20701173	0.89497031	1.01079488	1.01079488
ENSG00000183260	ABHD16B	6.58E-15	4.36E-13	2.24676908	0.28833028	4.14839162	1.60047452	0.01667922	0.63225732	0.9185822	0.9185822
ENSG00000226025	LGALS17A	0.00472378	0.01175293	2.2449894	0.79460485	3.27596588	7.94383395	0.08797355	7.01524124	0.85775048	7.01524124
ENSG00000132329	RAMP1	1.79E-09	3.10E-08	2.24267965	0.37281152	4.51458406	2.49615399	0.01759239	1.54602744	0.96843689	1.54602744
ENSG00000131203	IDO1	7.29E-05	0.00031645	2.24239561	0.56533209	5.76376016	4.49335677	0.00804017	3.58746407	1.06646097	3.58746407
ENSG00000131871	SELENOS	5.15E-13	2.29E-11	2.23920019	0.31008815	5.40783824	1.44398762	0.02724809	0.46908937	1.05449185	1.05449185
ENSG00000276070	CCL4L2	9.75E-06	5.59E-05	2.23843068	0.50612927	3.52433527	3.78843719	0.07339983	2.80847707	0.85950101	2.80847707
ENSG00000276125	CCL4L2	9.68E-06	5.56E-05	2.23776009	0.5058063	3.52383233	3.78425035	0.07327119	2.8049289	0.85948678	2.8049289
ENSG00000286070		8.66E-09	1.23E-07	2.23462563	0.38828297	5.76160543	2.61950416	0.11998516	1.57610603	1.06642757	1.57610603
ENSG00000132207	SLX1A	2.64E-10	5.75E-09	2.23387054	0.35354523	5.44514868	2.33386834	0.02803517	1.3781499	1.05632625	1.3781499
ENSG00000284505	LYNX1-SLURP2	2.95E-11	8.62E-10	2.23335193	0.33588504	2.83772824	2.19877419	0.19428931	1.07492177	0.88993956	1.07492177
ENSG00000175906	ARL4D	4.05E-10	8.29E-09	2.23297076	0.35715123	4.96711028	2.36144453	0.01534191	1.41967438	1.02197219	1.41967438
ENSG00000206493	HLA-E	3.06E-11	8.86E-10	2.23112178	0.33582318	6.03811634	2.19641616	0.01475801	1.25398559	1.06701081	1.25398559
ENSG00000230254	HLA-E	3.06E-11	8.86E-10	2.23112178	0.33582318	6.03811634	2.19641616	0.01475801	1.25398559	1.06701081	1.25398559
ENSG00000233904	HLA-E	3.06E-11	8.86E-10	2.23112178	0.33582318	6.03811634	2.19641616	0.01475801	1.25398559	1.06701081	1.25398559
ENSG00000229252	HLA-E	3.06E-11	8.86E-10	2.23112178	0.33582318	6.03811634	2.19641616	0.01475801	1.25398559	1.06701081	1.25398559
ENSG00000174950	CD164L2	7.39E-09	1.07E-07	2.23107075	0.38588168	5.18389617	2.59591794	0.00811757	1.66705994	1.04090581	1.66705994
ENSG00000173812	EIF1	9.20E-13	3.82E-11	2.2306945	0.31233601	8.06232067	2.02769187	0.00236352	1.09511654	0.87204643	1.09511654
ENSG00000198258	UBL5	2.58E-13	1.23E-11	2.23048377	0.30493915	6.97205933	1.76319746	0.02908557	0.79952218	1.01702816	1.01702816
ENSG00000175416	CLTB	5.12E-13	2.29E-11	2.22928516	0.3086818	5.71048967	1.51006421	0.00646075	0.56568623	1.06548936	1.06548936
ENSG00000168003	SLC3A2	2.48E-13	1.19E-11	2.22880728	0.30449272	6.81277565	1.80902403	0.01210465	0.86456986	1.03094826	1.03094826
ENSG00000006016	CRLF1	1.02E-10	2.53E-09	2.22802487	0.34465092	4.36352806	2.26021681	0.03314326	1.30317959	0.94600576	1.30317959
ENSG00000251000	GGCTP1	1.96E-12	7.52E-11	2.22727377	0.31649366	1.81508463	1.79314169	0.15778097	0.70406282	0.96911173	0.96911173
ENSG00000196139	AKR1C3	1.73E-12	6.75E-11	2.22687568	0.31567544	6.11976295	1.87074661	0.05527548	0.88585517	1.06579811	1.06579811
ENSG00000119888	EPCAM	1.65E-08	2.16E-07	2.22677487	0.39443502	6.18558289	2.66607983	0.00343139	1.74683221	1.06436552	1.74683221
ENSG00000130066	SAT1	9.26E-17	9.16E-15	2.22550309	0.26768494	9.25986323	1.46265522	0.15953097	0.36765762	0.64659031	0.64659031
ENSG00000145494	NDUFS6	3.67E-10	7.61E-09	2.22531403	0.35506255	5.77145004	2.33848386	0.00367921	1.41460172	1.0665761	1.41460172
ENSG00000177700	POLR2L	4.55E-12	1.58E-10	2.22383133	0.32141451	6.25229308	1.71506633	0.09970521	0.68568916	1.06250177	1.06250177
ENSG00000162585	FAAP20	8.71E-12	2.89E-10	2.22171401	0.32546491	5.92475457	1.61635471	0.12403155	0.562775	1.0676518	1.0676518
ENSG00000107872	FBXL15	2.46E-13	1.18E-11	2.22114405	0.30338026	4.4967069	1.95860148	0.00962761	1.02581768	0.9658411	1.02581768
ENSG00000177519	RPRM	1.20E-11	3.87E-10	2.21950662	0.32735884	4.06427765	2.12447873	0.02802574	1.17756713	0.90739586	1.17756713
ENSG00000104341	LAPTM4B	1.35E-12	5.43E-11	2.21905168	0.31303318	5.63224268	1.70068046	0.03886378	0.73601563	1.06352112	1.06352112
ENSG00000227715	HLA-A	0.00400966	0.01020347	2.21894266	0.77116228	7.72431256	7.5157246	0.0519468	6.63832997	0.92522884	6.63832997
ENSG00000101363	MANBAL	3.76E-10	7.75E-09	2.21804877	0.35410602	5.7875396	2.32482634	0.00604837	1.4046012	1.06679625	1.4046012
ENSG00000197838	CYP2A13	2.54E-06	1.79E-05	2.21752757	0.47132668	5.81990003	3.39446078	0.00524232	2.49393207	1.0671595	2.49393207
ENSG00000129951	PLPPR3	4.30E-08	5.01E-07	2.21700233	0.40471321	4.83624142	2.74863824	0.01875732	1.82391145	1.00729774	1.82391145
ENSG00000196136	SERPINA3	1.60E-05	8.59E-05	2.21568405	0.51362815	3.9406888	3.85368956	0.19346434	2.7744418	0.89006819	2.7744418
ENSG00000142700	DMRTA2	3.90E-10	8.02E-09	2.21562671	0.35405245	5.18144439	2.32235918	0.00984957	1.40037322	1.04073386	1.40037322
ENSG00000165175	MID1IP1	5.00E-13	2.24E-11	2.2141797	0.30644545	6.54614342	1.72582344	0.00703674	0.79760854	1.04943741	1.04943741
ENSG00000227243	SLAMF6P1	5.24E-08	5.97E-07	2.21197926	0.40639973	1.71715652	2.75952495	0.08365859	1.77439976	0.9704263	1.77439976
ENSG00000131037	EPS8L1	6.92E-13	2.99E-11	2.21191347	0.30802449	6.25235416	1.76282077	0.00488986	0.83933622	1.06249988	1.06249988
ENSG00000109736	MFSD10	2.21E-09	3.73E-08	2.21119193	0.36964703	5.8115662	2.44342899	0.00557271	1.53161523	1.06707551	1.53161523
ENSG00000228913	UBD	0.00361538	0.00933983	2.21119115	0.75988414	1.72199858	7.31821132	0.06843528	6.42758363	0.97038334	6.42758363
ENSG00000262473	GART	2.97E-13	1.40E-11	2.21109625	0.3030582	4.25124392	1.29947972	0.1026803	0.27091718	0.93056776	0.93056776
ENSG00000134248	LAMTOR5	1.44E-08	1.92E-07	2.21028759	0.38990835	6.4884607	2.61286503	0.00191517	1.70840571	1.05261773	1.70840571
ENSG00000282902	LGALS7B	0.00094966	0.00292225	2.21022895	0.66874715	2.55552875	5.87746362	0.15694785	4.87430807	0.92480119	4.87430807
ENSG00000120129	DUSP1	7.25E-09	1.06E-07	2.20992741	0.38200044	7.00403365	2.54505328	0.0017879	1.63986086	1.01398396	1.63986086
ENSG00000160345	PIERCE1	1.05E-07	1.11E-06	2.20969957	0.41555124	6.42100743	2.84079215	0.00221779	1.94046409	1.05595834	1.94046409
ENSG00000229698	HLA-F	2.10E-06	1.52E-05	2.20901041	0.46571903	5.06953023	3.32915939	0.16948495	2.27057497	1.03202874	2.27057497
ENSG00000176845	METRNL	2.85E-10	6.12E-09	2.20881328	0.35023549	4.83539807	2.28688095	0.04144362	1.33853646	1.00719975	1.33853646
ENSG00000158716	DUSP23	8.16E-11	2.07E-09	2.20812677	0.33983393	5.3782306	2.20692117	0.00582124	1.29340861	1.0529457	1.29340861
ENSG00000189280	GJB5	2.48E-11	7.44E-10	2.20750306	0.33073606	4.95249945	2.13892583	0.00968853	1.22090783	1.02041061	1.22090783
ENSG00000125611	CHCHD5	2.85E-11	8.38E-10	2.20748577	0.3317493	5.29974097	2.14633487	0.00680837	1.23133958	1.04846981	1.23133958
ENSG00000235692	PFDN6	1.15E-12	4.70E-11	2.20740957	0.31042172	4.15052196	1.99480277	0.03086896	1.05319952	0.9188456	1.05319952
ENSG00000237335	PFDN6	7.41E-13	3.18E-11	2.2071274	0.30775721	4.15485898	1.97634899	0.03127179	1.03426637	0.91937787	1.03426637
ENSG00000224782	PFDN6	7.41E-13	3.18E-11	2.2071274	0.30775721	4.15485898	1.97634899	0.03127179	1.03426637	0.91937787	1.03426637
ENSG00000163399	ATP1A1	7.72E-13	3.30E-11	2.20518798	0.30773016	6.58183638	1.92012322	0.01802946	0.99197333	1.04732139	1.04732139
ENSG00000121900	TMEM54	4.52E-12	1.58E-10	2.20511972	0.31866255	5.46691252	1.51471344	0.08505382	0.51260776	1.05733665	1.05733665
ENSG00000125652	ALKBH7	6.99E-11	1.83E-09	2.20499414	0.33814523	5.30964804	2.19162331	0.00571999	1.28062974	1.0490644	1.28062974
ENSG00000168350	DEGS2	4.42E-10	8.99E-09	2.2045714	0.35337961	5.62880913	2.3077773	0.05670841	1.34815954	1.06342029	1.34815954
ENSG00000188223		5.22E-05	0.00023681	2.2040489	0.54482388	1.73186567	4.20905386	1.32610995	2.01326199	0.97028873	2.01326199
ENSG00000101460	MAP1LC3A	8.61E-13	3.63E-11	2.20248579	0.30799457	5.32293649	1.41702887	0.01733373	0.48321088	1.04984863	1.04984863
ENSG00000175550	DRAP1	8.88E-08	9.55E-07	2.20237374	0.41179383	6.25373458	2.80024917	0.00313139	1.90457788	1.06245694	1.90457788
ENSG00000166523	CLEC4E	3.39E-05	0.00016323	2.19988953	0.53069897	3.82070208	4.03755156	0.0457603	3.1227054	0.87547263	3.1227054
ENSG00000263639	MSMB	5.61E-05	0.00025197	2.1992463	0.54593021	7.93072025	4.21836722	0.00051177	3.35243595	0.89350247	3.35243595
ENSG00000267472	ARHGAP27P2	3.28E-12	1.18E-10	2.19919568	0.31573541	1.53357152	1.95173671	0.15110811	0.89617244	0.97039142	0.97039142
ENSG00000117691	NENF	9.18E-12	3.03E-10	2.19886122	0.32246743	5.29483854	1.46390896	0.12166149	0.42966582	1.04817247	1.04817247
ENSG00000230118		1.58E-09	2.76E-08	2.19872146	0.36424128	1.78192953	2.38906816	0.11316692	1.37938982	0.96966214	1.37938982
ENSG00000129538	RNASE1	3.32E-08	3.97E-07	2.19743141	0.39780594	5.01645371	2.6708605	0.01457363	1.76573397	1.02703274	1.76573397
ENSG00000134809	TIMM10	5.30E-13	2.35E-11	2.19606613	0.30427799	4.82154786	1.94351223	0.00794637	1.03363595	1.0055878	1.03363595
ENSG00000260428	SCX	4.69E-14	2.55E-12	2.19598391	0.2912325	2.96158238	1.74458131	0.07790835	0.76138324	0.87627582	0.87627582
ENSG00000288141	MRPL23	3.64E-10	7.56E-09	2.19558913	0.35024953	5.23653299	2.27588382	0.00903622	1.37105455	1.04448025	1.37105455
ENSG00000214026	MRPL23	3.64E-10	7.56E-09	2.19558913	0.35024953	5.23653299	2.27588382	0.00903622	1.37105455	1.04448025	1.37105455
ENSG00000126460	PRRG2	3.36E-12	1.21E-10	2.19449935	0.31521289	5.01020461	1.45516257	0.09137863	0.45476851	1.02641199	1.02641199
ENSG00000138175	ARL3	2.50E-12	9.29E-11	2.19436006	0.31333696	6.47711576	1.73773361	0.05131736	0.78239129	1.05320823	1.05320823
ENSG00000173915	ATP5MK	1.06E-12	4.36E-11	2.19323745	0.3079396	6.9667453	1.80691249	0.04927534	0.85576033	1.01752611	1.01752611
ENSG00000159228	CBR1	7.90E-08	8.60E-07	2.19263037	0.40835296	6.55837309	2.76087432	0.00170624	1.87425532	1.04872509	1.87425532
ENSG00000275430	MUC20	7.60E-11	1.96E-09	2.19170684	0.33675475	4.32932919	2.17010536	0.06330334	1.21248897	0.94106063	1.21248897
ENSG00000183018	SPNS2	3.26E-12	1.18E-10	2.19075833	0.31449851	4.57423318	2.00901395	0.01177771	1.10095203	0.97670977	1.10095203
ENSG00000104853	CLPTM1	1.25E-12	5.07E-11	2.1902375	0.30848608	5.56497258	1.46708023	0.00926214	0.55263278	1.06132908	1.06132908
ENSG00000049449	RCN1	1.55E-12	6.11E-11	2.18992287	0.3097508	4.70260984	1.97553903	0.01030851	1.06907904	0.9917877	1.06907904
ENSG00000182809	CRIP2	2.54E-11	7.56E-10	2.18819806	0.32801277	6.20306701	1.79009832	0.14649723	0.74571708	1.06391703	1.06391703
ENSG00000100979	PLTP	1.57E-11	4.92E-10	2.18792411	0.32454606	6.2449336	2.00250396	0.12223652	0.98627813	1.06272764	1.06272764
ENSG00000069399	BCL3	3.13E-12	1.14E-10	2.18727761	0.31373422	4.97999724	2.00079816	0.01259965	1.09472843	1.02332721	1.09472843
ENSG00000182087	TMEM259	8.38E-13	3.55E-11	2.18711994	0.30568812	6.80419936	1.72021705	0.01962084	0.8024223	1.03163793	1.03163793
ENSG00000130522	JUND	1.27E-12	5.15E-11	2.18653587	0.30808941	6.32056366	1.59690308	0.00767153	0.68942703	1.06016819	1.06016819
ENSG00000120306	CYSTM1	4.15E-08	4.86E-07	2.18633816	0.398649	6.47338071	2.66901369	0.00169525	1.78616627	1.05340011	1.78616627
ENSG00000125656	CLPP	2.87E-12	1.06E-10	2.18535008	0.31291845	5.55102722	1.46246735	0.04075876	0.52059176	1.06081822	1.06081822
ENSG00000170231	FABP6	4.62E-08	5.33E-07	2.18394583	0.399592	5.4074085	2.67534492	0.00862737	1.78770249	1.05446997	1.78770249
ENSG00000242028	HYPK	2.73E-11	8.04E-10	2.18392877	0.327883	6.17088159	1.69704551	0.1447361	0.65644157	1.06472059	1.06472059
ENSG00000099849	RASSF7	4.52E-12	1.58E-10	2.18260533	0.31541195	5.79451824	1.5491293	0.05231979	0.59951229	1.06688308	1.06688308
ENSG00000142224	IL19	2.14E-12	8.10E-11	2.18232283	0.31064143	3.97518165	1.9753136	0.0803015	1.00530207	0.89482761	1.00530207
ENSG00000274129	TSEN34	1.09E-10	2.68E-09	2.18181017	0.33805409	4.705509	2.17154906	0.06303545	1.22262091	0.99211805	1.22262091
ENSG00000274419	TBC1D3D	0.00180041	0.00508209	2.18107413	0.69876617	2.20246963	6.30705231	0.37356051	5.11952375	0.95452076	5.11952375
ENSG00000230678	BRD2	1.66E-10	3.91E-09	2.17906463	0.3409963	5.80920949	2.05456208	0.24108233	0.92789237	1.06705056	1.06705056
ENSG00000166145	SPINT1	1.61E-12	6.30E-11	2.17860697	0.30837325	6.07652385	1.52685575	0.00328977	0.62926705	1.06651842	1.06651842
ENSG00000172428	COPS9	3.65E-11	1.04E-09	2.17793077	0.32910421	5.93069386	1.58077558	0.15083434	0.53714337	1.06764843	1.06764843
ENSG00000234487	HLA-F	1.42E-10	3.42E-09	2.17760428	0.33954978	5.71987624	2.17926145	0.13485408	1.16220404	1.06568249	1.16220404
ENSG00000129354	AP1M2	1.64E-10	3.88E-09	2.17715022	0.34062167	5.26557222	2.1869474	0.0112483	1.29401183	1.04635486	1.29401183
ENSG00000141349	G6PC3	1.09E-11	3.56E-10	2.17668971	0.32037452	5.6904031	1.58357509	0.08965327	0.60222047	1.06504488	1.06504488
ENSG00000185475	TMEM179B	2.54E-10	5.57E-09	2.17623186	0.34410562	5.52593334	2.21256768	0.00543902	1.32665858	1.05985097	1.32665858
ENSG00000197019	SERTAD1	1.93E-09	3.31E-08	2.17543867	0.36235344	5.55940361	2.35447902	0.00448162	1.47264358	1.06112737	1.47264358
ENSG00000169715	MT1E	1.73E-11	5.38E-10	2.1750492	0.32332407	6.13954383	1.98291117	0.11064746	0.9888322	1.06541014	1.06541014
ENSG00000112514	CUTA	1.89E-08	2.44E-07	2.17454023	0.38678482	6.17505495	2.55614684	0.00633557	1.67669253	1.06462185	1.67669253
ENSG00000099800	TIMM13	3.41E-09	5.48E-08	2.17413174	0.36783297	5.8391586	2.39764431	0.00658003	1.5155573	1.06732831	1.5155573
ENSG00000177370	TIMM22	0.00085007	0.00265432	2.17091342	0.65076245	3.55900332	5.58217132	0.97689174	3.78739061	0.86056703	3.78739061
ENSG00000124466	LYPD3	1.31E-11	4.19E-10	2.17089355	0.32076892	3.85999071	2.03654658	0.02566425	1.13187862	0.87979783	1.13187862
ENSG00000172366	MCRIP2	1.42E-10	3.41E-09	2.17077967	0.33844704	5.27902847	2.16533432	0.01333371	1.27531329	1.04719959	1.27531329
ENSG00000244398		6.33E-07	5.34E-06	2.16983878	0.43563651	5.70633675	2.99657903	0.29560231	1.83941336	1.06540094	1.83941336
ENSG00000128274	A4GALT	6.77E-13	2.93E-11	2.16816663	0.30180598	6.97642711	1.75647415	0.0081099	0.86682676	1.01661717	1.01661717
ENSG00000272835	SMDT1	1.05E-13	5.46E-12	2.16782838	0.29161492	4.38374398	1.80991356	0.00770076	0.92188116	0.94899095	0.94899095
ENSG00000274112	SMDT1	1.05E-13	5.46E-12	2.16782838	0.29161492	4.38374398	1.80991356	0.00770076	0.92188116	0.94899095	0.94899095
ENSG00000170786	SDR16C5	1.42E-12	5.68E-11	2.16770425	0.30609869	5.22634991	1.50878412	0.01027827	0.61308671	1.04380634	1.04380634
ENSG00000172551	MUCL1	1.25E-13	6.39E-12	2.16731217	0.29242544	4.28759775	1.55631243	0.02673226	0.64531016	0.93528491	0.93528491
ENSG00000105677	TMEM147	1.68E-10	3.95E-09	2.16625983	0.33911339	5.43139775	2.16658967	0.00532509	1.28840115	1.05566511	1.28840115
ENSG00000130332	LSM7	2.65E-09	4.36E-08	2.16376777	0.36354463	5.85298006	2.3543854	0.00383734	1.48301551	1.06742771	1.48301551
ENSG00000141873	SLC39A3	1.22E-12	4.98E-11	2.16373678	0.30463531	4.91159856	1.37114585	0.02811453	0.45857238	1.01591552	1.01591552
ENSG00000185043	CIB1	8.43E-12	2.82E-10	2.16292967	0.31663204	7.63021985	2.00080369	0.12786009	1.00001817	0.93884698	1.00001817
ENSG00000140379	BCL2A1	0.0002304	0.00085179	2.16285029	0.58723427	5.62427386	4.70571834	0.04303991	3.83645606	1.06328527	3.83645606
ENSG00000128039	SRD5A3	2.04E-08	2.62E-07	2.16097052	0.38530141	5.9229712	2.53226248	0.00942142	1.66072183	1.06765216	1.66072183
ENSG00000160446	ZDHHC12	5.64E-11	1.52E-09	2.16007917	0.32963688	5.50313163	1.41601306	0.16351119	0.37188404	1.0589191	1.0589191
ENSG00000176532	PRR15	2.02E-11	6.18E-10	2.1598621	0.32214858	6.09347088	1.71532751	0.10126467	0.73878747	1.06625702	1.06625702
ENSG00000169583	CLIC3	2.54E-11	7.56E-10	2.15900974	0.32365103	3.61896759	2.04727546	0.03957743	1.13885994	0.86277817	1.13885994
ENSG00000109321	AREG	1.20E-08	1.62E-07	2.15895078	0.37876447	3.36899301	2.47536134	0.0359368	1.57801663	0.85704245	1.57801663
ENSG00000178741	COX5A	4.29E-08	5.00E-07	2.1578216	0.39387287	6.50825088	2.60353082	0.00171495	1.74356324	1.05156007	1.74356324
ENSG00000160606	TLCD1	2.01E-12	7.69E-11	2.15741939	0.30672974	4.56240072	1.92799835	0.01799777	1.04043749	0.97512686	1.04043749
ENSG00000108590	MED31	6.81E-10	1.30E-08	2.15718115	0.34959277	4.62584555	2.23892287	0.01050621	1.36441372	0.98317203	1.36441372
ENSG00000244731	C4A	7.26E-09	1.06E-07	2.15694334	0.37286642	5.06723577	2.42468156	0.09424029	1.46984006	1.03182384	1.46984006
ENSG00000130725	UBE2M	1.40E-12	5.61E-11	2.1557994	0.30432937	4.88432102	1.27282377	0.0290987	0.36422118	1.0128354	1.0128354
ENSG00000170955	CAVIN3	2.73E-11	8.04E-10	2.154799	0.32352175	3.81200703	2.04288663	0.0463167	1.13117943	0.87459235	1.13117943
ENSG00000167741	GGT6	4.21E-12	1.48E-10	2.15426934	0.3108638	6.10257579	1.65539743	0.02105298	0.76271579	1.06610544	1.06610544
ENSG00000136810	TXN	5.47E-13	2.42E-11	2.1542338	0.29865401	7.86839352	1.16372602	0.10009524	0.18355474	0.90333973	0.90333973
ENSG00000250510	GPR162	4.85E-12	1.68E-10	2.15379722	0.31169122	6.02023993	1.8530712	0.02576087	0.95948436	1.06719258	1.06719258
ENSG00000123159	GIPC1	1.76E-12	6.83E-11	2.15107381	0.3050162	6.65890351	1.6162223	0.00427219	0.74231457	1.04237024	1.04237024
ENSG00000230395	ANAPC1P3	4.81E-10	9.71E-09	2.15068225	0.34547522	1.81700815	2.20193302	0.27029988	1.07242279	0.96907647	1.07242279
ENSG00000156413	FUT6	2.06E-12	7.85E-11	2.14904238	0.30568471	4.95967888	1.60206358	0.03005421	0.70382408	1.02118116	1.02118116
ENSG00000114395	CYB561D2	1.81E-11	5.62E-10	2.14898085	0.31976622	4.99319647	2.01139399	0.01597351	1.13434391	1.02469162	1.13434391
ENSG00000136867	SLC31A2	3.24E-06	2.19E-05	2.14897221	0.46164184	4.22243028	3.23745379	0.10668505	2.29083833	0.92708825	2.29083833
ENSG00000176956	LY6H	2.11E-08	2.71E-07	2.14891482	0.38356518	3.39559949	2.50759166	0.09751486	1.5576104	0.85716343	1.5576104
ENSG00000171124	FUT3	6.59E-11	1.74E-09	2.14765288	0.32890564	5.08992753	1.2808661	0.1832108	0.22509015	1.03380202	1.03380202
ENSG00000030582	GRN	3.17E-12	1.15E-10	2.14593541	0.30788938	6.27176237	1.78990434	0.00457343	0.9229726	1.06188009	1.06188009
ENSG00000111775	COX6A1	9.14E-13	3.81E-11	2.14547997	0.30036412	7.29686952	1.83683448	0.0325701	0.94309431	0.98238918	0.98238918
ENSG00000099977	DDT	3.74E-10	7.73E-09	2.14545514	0.34248069	5.30092398	2.17486777	0.01437454	1.305172	1.04854126	1.305172
ENSG00000273633	CDC42EP5	1.06E-06	8.40E-06	2.14430201	0.43937153	4.39707943	3.01171592	0.30536226	1.86642031	0.95097726	1.86642031
ENSG00000228300	FAM174C	1.68E-10	3.95E-09	2.14342326	0.33555752	5.31464927	2.12129172	0.00628851	1.26044855	1.04936135	1.26044855
ENSG00000099804	CDC34	1.58E-11	4.94E-10	2.14309198	0.31794681	5.48784451	1.40049697	0.07899807	0.45479218	1.05826639	1.05826639
ENSG00000162645	GBP2	2.25E-07	2.16E-06	2.14250998	0.41384356	7.05239209	2.76936971	0.01799822	1.90874982	1.00922445	1.90874982
ENSG00000142959	BEST4	8.52E-09	1.21E-07	2.14243333	0.37209375	5.48599754	2.40642047	0.12507545	1.43252932	1.05818603	1.43252932
ENSG00000008394	MGST1	1.48E-11	4.65E-10	2.1414098	0.31723015	5.63029607	1.83569587	0.06867931	0.90921124	1.06346411	1.06346411
ENSG00000229253	ZBTB22	1.27E-05	6.98E-05	2.14130115	0.49045498	2.66196261	3.53456763	0.19675841	2.50938505	0.91179868	2.50938505
ENSG00000227780	ZBTB22	1.27E-05	6.98E-05	2.14130115	0.49045498	2.66196261	3.53456763	0.19675841	2.50938505	0.91179868	2.50938505
ENSG00000115255	REEP6	5.13E-12	1.77E-10	2.14065796	0.31015466	4.40975788	1.58394771	0.12932979	0.59309657	0.95287426	0.95287426
ENSG00000137267	TUBB2A	8.19E-08	8.89E-07	2.14054368	0.39914673	6.31170606	2.63562288	0.0039029	1.78842587	1.06049518	1.78842587
ENSG00000178467	P4HTM	4.71E-12	1.64E-10	2.13843615	0.30929332	5.85791054	1.67765848	0.00874277	0.81085417	1.06745876	1.06745876
ENSG00000165171	METTL27	6.65E-08	7.38E-07	2.13695137	0.39570205	4.84626583	2.60241245	0.02213168	1.73939455	1.00846073	1.73939455
ENSG00000126759	CFP	4.03E-11	1.14E-09	2.13614322	0.32350525	5.42309372	2.02750461	0.02760038	1.14977563	1.05525738	1.14977563
ENSG00000196976	LAGE3	8.72E-12	2.89E-10	2.13504678	0.3127714	4.72145168	1.95107981	0.01163339	1.08890851	0.99394356	1.08890851
ENSG00000185201	IFITM2	1.48E-09	2.61E-08	2.13484473	0.35306544	6.44069218	2.24762872	0.14105203	1.26131903	1.05502585	1.26131903
ENSG00000281024	SURF2	1.77E-13	8.74E-12	2.13401904	0.28974379	4.2932353	1.77149263	0.00840914	0.91030028	0.93604483	0.93604483
ENSG00000148291	SURF2	1.77E-13	8.74E-12	2.13401904	0.28974379	4.2932353	1.77149263	0.00840914	0.91030028	0.93604483	0.93604483
ENSG00000110628	SLC22A18	4.54E-12	1.58E-10	2.13291372	0.308251	4.28688181	1.91829746	0.02723381	1.04172636	0.9351889	1.04172636
ENSG00000183793	NPIPA5	6.32E-07	5.33E-06	2.13146249	0.42789423	3.37860456	2.89116488	0.33338695	1.72641458	0.85707051	1.72641458
ENSG00000183696	UPP1	7.99E-10	1.51E-08	2.13048877	0.34669866	4.63127234	2.19481397	0.01934629	1.33290323	0.98380346	1.33290323
ENSG00000204950	LRRC10B	3.04E-06	2.08E-05	2.13037523	0.45634478	7.02275498	3.1685017	0.00117036	2.34164844	1.01216347	2.34164844
ENSG00000081041	CXCL2	2.17E-06	1.56E-05	2.12871935	0.44938964	3.40751074	3.09748864	0.03770251	2.23424682	0.85726078	2.23424682
ENSG00000204227	RING1	5.32E-05	0.00024049	2.12620623	0.52614583	4.79349663	3.92355384	0.41055313	2.70377801	1.00231359	2.70377801
ENSG00000165644	COMTD1	1.95E-12	7.49E-11	2.12575822	0.30203386	4.61472957	1.33936801	0.04442721	0.44153266	0.9818479	0.9818479
ENSG00000132963	POMP	2.41E-12	9.04E-11	2.12548259	0.30327389	6.98412408	1.86991691	0.01883015	1.0070533	1.01588917	1.01588917
ENSG00000169682	SPNS1	7.04E-12	2.40E-10	2.12546826	0.30997679	5.83120757	1.42788885	0.01370022	0.56254582	1.0672629	1.0672629
ENSG00000112667	DNPH1	3.33E-08	3.99E-07	2.12493996	0.38475135	6.13488684	2.49813282	0.00280433	1.66257369	1.06550478	1.66257369
ENSG00000205609	EIF3CL	0.00069854	0.00224377	2.12493624	0.62679693	4.56737542	5.205903	0.86530706	3.55452991	0.97579638	3.55452991
ENSG00000124249	KCNK15	6.53E-09	9.64E-08	2.12485721	0.36619368	2.34930704	2.34394535	0.12697997	1.3816204	0.94499619	1.3816204
ENSG00000123179	EBPL	1.80E-10	4.19E-09	2.12227916	0.33279062	5.09559741	2.08364212	0.00967707	1.23625587	1.03427899	1.23625587
ENSG00000198074	AKR1B10	3.22E-09	5.23E-08	2.1218112	0.35841841	4.50010028	2.27917004	0.01693254	1.42828472	0.96633692	1.42828472
ENSG00000188931	CFAP126	5.87E-07	4.99E-06	2.12009908	0.42440896	6.55307244	2.84910103	0.00186655	2.02451681	1.04903546	2.02451681
ENSG00000158710	TAGLN2	2.36E-10	5.23E-09	2.11975862	0.33455885	7.75587965	2.09465368	0.06799509	1.19121319	0.92053805	1.19121319
ENSG00000067113	PLPP1	9.13E-12	3.02E-10	2.11868411	0.31067264	3.90308899	1.92333752	0.02032179	1.06549998	0.88509393	1.06549998
ENSG00000116096	SPR	1.84E-11	5.70E-10	2.11805409	0.31528734	4.80206357	1.9547747	0.01070658	1.10761212	1.00331423	1.10761212
ENSG00000123810	B9D2	8.20E-10	1.55E-08	2.11645465	0.3446439	5.40625431	2.16773895	0.00720785	1.3290606	1.05441115	1.3290606
ENSG00000025708	TYMP	2.58E-12	9.55E-11	2.1163479	0.30238925	7.9696774	1.61290232	0.1414458	0.63050751	0.88724583	0.88724583
ENSG00000156587	UBE2L6	5.25E-09	8.04E-08	2.11607935	0.3624103	6.35162565	2.30636117	0.01158045	1.46600836	1.05896464	1.46600836
ENSG00000160888	IER2	3.70E-10	7.66E-09	2.11584673	0.33767135	6.75518528	2.11463391	0.00249158	1.28025528	1.03546012	1.28025528
ENSG00000169564	PCBP1	8.24E-13	3.50E-11	2.11572348	0.29561402	7.30739102	1.76688841	0.0019774	0.9271295	0.98113365	0.98113365
ENSG00000188910	GJB3	1.04E-10	2.57E-09	2.11470397	0.3273021	4.80228693	2.03745498	0.01234014	1.19283484	1.00334031	1.19283484
ENSG00000184840	TMED9	1.45E-09	2.56E-08	2.11416817	0.34943308	5.64212374	2.20265634	0.00452003	1.36914411	1.06380457	1.36914411
ENSG00000159713	TPPP3	6.61E-05	0.00029056	2.11353	0.52972742	8.47044163	3.95512915	0.00032416	3.15655115	0.80032564	3.15655115
ENSG00000112699	GMDS	6.71E-12	2.29E-10	2.11046518	0.30747883	5.22588572	1.39445757	0.01983592	0.53472934	1.04377542	1.04377542
ENSG00000176046	NUPR1	6.74E-08	7.48E-07	2.11028333	0.39094558	6.19533199	2.53943497	0.00562851	1.71380401	1.06411895	1.71380401
ENSG00000182632	CCNYL2	2.45E-11	7.39E-10	2.10947877	0.3159745	2.80782187	1.95265948	0.0338179	1.08938083	0.89354241	1.08938083
ENSG00000204673	AKT1S1	1.56E-10	3.71E-09	2.10737261	0.3292854	5.34965939	2.04595436	0.00791851	1.21190632	1.05137911	1.21190632
ENSG00000146242	TPBG	4.02E-12	1.43E-10	2.10655088	0.30369103	4.58031407	1.59611128	0.06005777	0.7028397	0.97750998	0.97750998
ENSG00000175197	DDIT3	7.94E-11	2.03E-09	2.10404417	0.323609	5.56454151	1.86956688	0.11681779	0.9262973	1.06131358	1.06131358
ENSG00000143537	ADAM15	5.05E-11	1.39E-09	2.10344772	0.32018556	6.1880534	1.76426205	0.08903251	0.8474489	1.06430388	1.06430388
ENSG00000177283	FZD8	1.42E-10	3.41E-09	2.10319908	0.32791107	4.4147115	2.03261478	0.02091755	1.18874625	0.95361697	1.18874625
ENSG00000148834	GSTO1	1.82E-07	1.78E-06	2.10002917	0.40252117	6.2226746	2.63278097	0.00239639	1.82036565	1.06338025	1.82036565
ENSG00000101222	SPEF1	6.97E-07	5.80E-06	2.09877632	0.42296234	6.29991894	2.8183912	0.00431513	2.00827767	1.06091914	2.00827767
ENSG00000123353	ORMDL2	5.77E-10	1.13E-08	2.09853121	0.33865465	5.31347142	2.10807414	0.00947826	1.28075019	1.04929161	1.28075019
ENSG00000248485	PCP4L1	6.63E-06	4.02E-05	2.096965	0.46544739	4.679268	3.23436664	0.02113336	2.41608099	0.98914902	2.41608099
ENSG00000129007	CALML4	4.49E-06	2.89E-05	2.09688448	0.45712615	7.28106637	3.14940029	0.00518916	2.3456594	0.98425977	2.3456594
ENSG00000086548	CEACAM6	7.63E-12	2.57E-10	2.09587458	0.30617547	6.55711615	1.81717587	0.00581453	0.99066152	1.04879891	1.04879891
ENSG00000134247	PTGFRN	7.99E-13	3.40E-11	2.09556706	0.29262055	4.04926713	1.72242566	0.05800953	0.84233271	0.90529181	0.90529181
ENSG00000135114	OASL	6.95E-05	0.00030408	2.09374844	0.52634785	5.76254013	3.89978812	0.06946698	3.04725622	1.06644212	3.04725622
ENSG00000104964	TLE5	4.07E-11	1.15E-09	2.09361042	0.31714381	8.03282705	1.94812934	0.00224445	1.12928278	0.87693321	1.12928278
ENSG00000169908	TM4SF1	3.22E-11	9.28E-10	2.09351429	0.31547221	5.51717118	1.80319834	0.06013171	0.92404378	1.0594988	1.0594988
ENSG00000214967	NPIPA7	4.21E-05	0.00019596	2.09337717	0.51109476	3.18324626	3.72448672	0.60804729	2.3306536	0.86041842	2.3306536
ENSG00000185950	IRS2	2.66E-08	3.27E-07	2.09147658	0.37599693	5.83598017	2.39757494	0.00337762	1.58707644	1.06730289	1.58707644
ENSG00000126768	TIMM17B	1.28E-11	4.10E-10	2.09146137	0.30887364	5.928851	1.3879214	0.00563309	0.55777196	1.06764983	1.06764983
ENSG00000274853	MRM1	3.15E-05	0.00015332	2.09028531	0.50214987	2.32285059	3.62178556	0.53471711	2.30202091	0.9468758	2.30202091
ENSG00000066336	SPI1	3.91E-07	3.48E-06	2.08951784	0.41188548	6.08513621	2.70872626	0.00870843	1.89985012	1.06638895	1.89985012
ENSG00000278567	CCL3	0.00035947	0.00125632	2.08828586	0.58525283	4.49101877	4.61958343	0.19558258	3.65777727	0.96500711	3.65777727
ENSG00000105258	POLR2I	5.39E-08	6.11E-07	2.08789176	0.38395005	6.06023994	2.46156012	0.00404825	1.65440023	1.06674414	1.65440023
ENSG00000140564	FURIN	8.41E-12	2.82E-10	2.08763611	0.30559172	6.69839431	1.63725647	0.01096327	0.80917649	1.0396326	1.0396326
ENSG00000169223	LMAN2	1.82E-11	5.62E-10	2.08745506	0.31062514	6.54281247	1.52733036	0.03586063	0.67260435	1.04962913	1.04962913
ENSG00000128524	ATP6V1F	8.36E-08	9.03E-07	2.08469796	0.38898999	6.37975182	2.50210139	0.00189639	1.70037721	1.05779875	1.70037721
ENSG00000130313	PGLS	1.87E-11	5.76E-10	2.08408431	0.31032376	5.99189751	1.44335653	0.01596548	0.60980525	1.06741893	1.06741893
ENSG00000109861	CTSC	4.34E-10	8.84E-09	2.08403742	0.33391331	7.21968317	2.06124819	0.04985764	1.20449596	0.99135065	1.20449596
ENSG00000197982	C1orf122	1.32E-09	2.36E-08	2.0834013	0.34351377	5.50674853	2.13266824	0.01379733	1.3137219	1.05907025	1.3137219
ENSG00000089127	OAS1	2.02E-06	1.47E-05	2.08274436	0.43837325	7.27459798	2.95240961	0.00595152	2.15597342	0.98502013	2.15597342
ENSG00000274113	LILRA5	0.00058532	0.00192809	2.08175411	0.60545589	2.92980549	4.88043244	0.30762445	3.81636498	0.87954267	3.81636498
ENSG00000102390	PBDC1	2.03E-11	6.20E-10	2.08144148	0.31049146	5.03386291	1.89226628	0.00734326	1.07721236	1.02872779	1.07721236
ENSG00000142168	SOD1	7.37E-11	1.91E-09	2.08107916	0.31952653	7.42500976	1.95493121	0.12486938	1.02372413	0.966557	1.02372413
ENSG00000214447	FAM187A	2.77E-05	0.0001377	2.07881205	0.49599174	4.97733565	3.54468671	0.78638179	1.98120607	1.02304915	1.98120607
ENSG00000168000	BSCL2	4.37E-08	5.08E-07	2.07565582	0.37909038	7.34866413	2.41083672	0.11097268	1.50575941	0.97613104	1.50575941
ENSG00000174326	SLC16A11	9.40E-09	1.32E-07	2.07546211	0.36150471	4.13675914	2.26664825	0.05071157	1.41950202	0.91712245	1.41950202
ENSG00000163083	INHBB	6.36E-11	1.69E-09	2.07542851	0.31758363	5.07329228	1.93676308	0.01851814	1.11614966	1.03236238	1.11614966
ENSG00000155366	RHOC	1.40E-11	4.45E-10	2.07337862	0.30680627	6.66247205	1.61993659	0.01683508	0.79719331	1.04212841	1.04212841
ENSG00000167705	RILP	7.13E-12	2.42E-10	2.07332944	0.3024521	4.13563605	1.73690789	0.11213964	0.82091635	0.91697966	0.91697966
ENSG00000116857	TMEM9	1.56E-09	2.73E-08	2.07100853	0.34298316	5.2683348	2.11882273	0.00633853	1.31708273	1.04652953	1.31708273
ENSG00000165886	UBTD1	6.62E-10	1.27E-08	2.07095074	0.33538753	5.30459942	2.06179231	0.00591145	1.25954251	1.04876246	1.25954251
ENSG00000140391	TSPAN3	1.15E-11	3.74E-10	2.07087209	0.30516383	7.87201759	1.04744456	0.14488215	0.0887985	0.90277365	0.90277365
ENSG00000101940	WDR13	5.73E-11	1.54E-09	2.07073883	0.31611255	5.99947794	1.43351944	0.05681451	0.56970454	1.06736583	1.06736583
ENSG00000234078	DDR1	4.88E-10	9.80E-09	2.06988157	0.33262098	5.35383471	2.00598169	0.19305046	1.01648937	1.05161258	1.05161258
ENSG00000215522	DDR1	4.88E-10	9.80E-09	2.06988157	0.33262098	5.35383471	2.00598169	0.19305046	1.01648937	1.05161258	1.05161258
ENSG00000204052	LRRC73	7.15E-09	1.04E-07	2.06973833	0.3576257	5.0700316	2.23127411	0.00883196	1.42999966	1.03207337	1.42999966
ENSG00000069849	ATP1B3	2.51E-09	4.16E-08	2.06896616	0.34710412	5.33073283	2.14866128	0.01081775	1.34459656	1.0503016	1.34459656
ENSG00000188820	CALHM6	3.36E-05	0.00016183	2.06865652	0.49873856	4.31460268	3.56687326	0.02496389	2.77336283	0.93898492	2.77336283
ENSG00000002330	BAD	3.41E-11	9.77E-10	2.06812945	0.31203851	5.51638818	1.38314864	0.03592336	0.54145124	1.05946697	1.05946697
ENSG00000217930	PAM16	2.16E-08	2.75E-07	2.06448025	0.3687413	4.30683532	2.31642213	0.05523967	1.47442447	0.93790572	1.47442447
ENSG00000133636	NTS	1.00E-05	5.71E-05	2.06445949	0.46742598	5.2226251	3.22898676	0.01026479	2.44771448	1.04355771	2.44771448
ENSG00000169242	EFNA1	1.01E-10	2.51E-09	2.06444469	0.31929749	4.80364362	1.94016417	0.01306074	1.13388672	1.00349875	1.13388672
ENSG00000088986	DYNLL1	7.98E-06	4.71E-05	2.06390112	0.46217812	7.69819502	3.1745951	0.00046088	2.40263606	0.929064	2.40263606
ENSG00000155428	TRIM74	3.94E-07	3.50E-06	2.0631934	0.40679806	2.21849161	2.64181987	0.18777306	1.67392941	0.95358903	1.67392941
ENSG00000147123	NDUFB11	1.08E-10	2.66E-09	2.06283843	0.31952983	6.14409184	1.50818346	0.0833015	0.6255032	1.06531576	1.06531576
ENSG00000243649	CFB	8.80E-10	1.65E-08	2.0623126	0.33644566	6.12836806	2.06284628	0.12501647	1.14843492	1.06563384	1.14843492
ENSG00000073737	DHRS9	2.35E-12	8.84E-11	2.06130942	0.29396175	7.52897606	1.76586489	0.00176258	0.97038945	0.95286923	0.97038945
ENSG00000119421	NDUFA8	1.18E-08	1.60E-07	2.06127071	0.36147426	5.65238057	2.25521091	0.00588742	1.46407857	1.06408822	1.46407857
ENSG00000090520	DNAJB11	1.36E-07	1.38E-06	2.06099214	0.39105	6.34711628	2.50113326	0.00647389	1.71387725	1.05914485	1.71387725
ENSG00000157601	MX1	3.83E-06	2.52E-05	2.06048988	0.44596785	8.43820608	3.00910484	0.00251637	2.23496599	0.80624081	2.23496599
ENSG00000180921	FAM83H	3.59E-10	7.48E-09	2.0600326	0.32850888	6.11123388	1.5754343	0.14812434	0.6313345	1.06595409	1.06595409
ENSG00000103569	AQP9	0.00283885	0.0075405	2.05971515	0.69009826	4.8900355	6.07578028	0.12972077	5.22792989	1.01348517	5.22792989
ENSG00000181830	SLC35C1	6.74E-11	1.77E-09	2.0587984	0.31545767	5.41310389	1.36639649	0.06476882	0.50303412	1.05475849	1.05475849
ENSG00000125037	EMC3	1.64E-10	3.88E-09	2.05830311	0.32201428	6.27478336	1.54291966	0.10476798	0.64299716	1.06178049	1.06178049
ENSG00000198680	TUSC1	2.15E-12	8.15E-11	2.05776286	0.29295601	4.25276352	1.75655116	0.01890982	0.94660145	0.93075803	0.94660145
ENSG00000274384	TMC4	1.08E-06	8.53E-06	2.05562017	0.42150357	4.08295119	2.77058121	0.07036423	1.92836991	0.90998232	1.92836991
ENSG00000145860	RNF145	1.39E-11	4.44E-10	2.05548623	0.30411777	6.79997151	1.56416078	0.00851007	0.7631101	1.03197564	1.03197564
ENSG00000129451	KLK10	2.35E-10	5.23E-09	2.0554767	0.32437757	5.26813217	1.96928224	0.03350806	1.15022602	1.04651674	1.15022602
ENSG00000129562	DAD1	3.54E-09	5.66E-08	2.05446026	0.34796063	5.69060703	2.14384	0.00341369	1.35869807	1.06504961	1.35869807
ENSG00000130733	YIPF2	4.72E-11	1.30E-09	2.05334302	0.31207472	4.96744033	1.34660543	0.07363743	0.47838451	1.02200717	1.02200717
ENSG00000143545	RAB13	1.66E-08	2.18E-07	2.05312991	0.36376045	5.94767411	2.2671608	0.00308423	1.48553448	1.06762033	1.48553448
ENSG00000267855	NDUFA7	3.19E-11	9.22E-10	2.05173747	0.30910802	5.56255153	1.32662687	0.0136706	0.51930674	1.06124177	1.06124177
ENSG00000211445	GPX3	9.67E-12	3.18E-10	2.04887146	0.30080594	4.8378756	1.38785231	0.01045983	0.58707812	1.00748756	1.00748756
ENSG00000198157	HMGN5	2.41E-12	9.04E-11	2.04840668	0.29228502	4.10640838	1.74488276	0.02228774	0.93880573	0.91316273	0.93880573
ENSG00000156966	B3GNT7	2.93E-11	8.59E-10	2.04747698	0.30789411	6.2570783	1.56574571	0.00413409	0.77547237	1.06235222	1.06235222
ENSG00000131495	NDUFA2	1.28E-10	3.12E-09	2.04746194	0.31847529	6.20721025	1.51087786	0.07724169	0.64656286	1.06380658	1.06380658
ENSG00000125999	BPIFB1	2.49E-14	1.43E-12	2.04704841	0.26855768	9.58250906	1.59665234	0.08125392	0.73013241	0.58124767	0.73013241
ENSG00000110108	TMEM109	1.80E-07	1.77E-06	2.04698004	0.39224054	6.29392241	2.50047083	0.00471266	1.72612953	1.06112991	1.72612953
ENSG00000131050	BPIFA2	7.80E-10	1.48E-08	2.04658359	0.33283961	2.9618979	2.02383159	0.21399229	1.03230752	0.87624436	1.03230752
ENSG00000157613	CREB3L1	6.14E-11	1.64E-09	2.04648935	0.31290716	5.14141103	1.5018158	0.06363834	0.65172023	1.03785916	1.03785916
ENSG00000060558	GNA15	7.23E-12	2.45E-10	2.04593436	0.29854437	4.75553265	1.31246645	0.00481239	0.51837273	0.99788594	0.99788594
ENSG00000109390	NDUFC1	1.99E-08	2.56E-07	2.04578333	0.36448527	5.9164081	2.26725658	0.00327238	1.49128463	1.06765088	1.49128463
ENSG00000189171	S100A13	7.01E-11	1.83E-09	2.04480215	0.31360136	6.07305034	1.62317677	0.03982174	0.80032915	1.06656866	1.06656866
ENSG00000140284	SLC27A2	1.37E-06	1.04E-05	2.04464099	0.42340635	6.34920787	2.77977724	0.00660658	2.01021399	1.05906149	2.01021399
ENSG00000175315	CST6	3.40E-12	1.22E-10	2.04406698	0.29367941	3.03768977	1.75053251	0.07293269	0.89735279	0.86932824	0.89735279
ENSG00000182704	TSKU	4.06E-11	1.14E-09	2.04365705	0.30956313	5.91960102	1.61067358	0.01042794	0.81791226	1.06765202	1.06765202
ENSG00000165233	CARD19	8.74E-10	1.64E-08	2.04309551	0.33324255	5.08982509	2.02407974	0.00928347	1.24003572	1.03379334	1.24003572
ENSG00000213719	CLIC1	1.84E-12	7.10E-11	2.0429433	0.28994823	8.04047042	1.422648	0.0701162	0.56752238	0.87567102	0.87567102
ENSG00000090013	BLVRB	3.12E-08	3.77E-07	2.04285855	0.36909267	6.00625976	2.30235565	0.00248153	1.53009923	1.06731372	1.53009923
ENSG00000228267	C4B	0.00038512	0.00133726	2.04225656	0.57527137	3.57407657	4.45522242	0.10598763	3.61705529	0.86108091	3.61705529
ENSG00000102007	PLP2	2.36E-10	5.23E-09	2.03929896	0.32186516	5.95939851	1.6202837	0.09788334	0.74368407	1.06758497	1.06758497
ENSG00000101182	PSMA7	2.72E-11	8.04E-10	2.03900527	0.30610903	6.66139591	1.55319333	0.01195438	0.76159827	1.04220145	1.04220145
ENSG00000090238	YPEL3	6.40E-11	1.70E-09	2.03888294	0.31203829	5.94273477	1.46046961	0.02775749	0.65156951	1.06763132	1.06763132
ENSG00000283085	TPBG	5.08E-10	1.01E-08	2.03834208	0.32787969	3.85606576	1.8846531	0.33009022	0.78116152	0.87934209	0.87934209
ENSG00000204237	OXLD1	6.68E-11	1.76E-09	2.03769813	0.31216363	4.91944768	1.86942383	0.01163403	1.08463498	1.01679075	1.08463498
ENSG00000163870	TPRA1	6.47E-11	1.71E-09	2.03755287	0.31191673	5.34414415	1.39820459	0.04346718	0.57357294	1.05106837	1.05106837
ENSG00000169738	DCXR	2.51E-09	4.16E-08	2.03744245	0.34182437	5.5023151	2.08375133	0.00660358	1.30789032	1.0588848	1.30789032
ENSG00000106400	ZNHIT1	2.88E-11	8.47E-10	2.03698791	0.30620443	7.24690238	1.82811863	0.04177861	1.01303436	0.98824086	1.01303436
ENSG00000130707	ASS1	1.42E-10	3.41E-09	2.03674616	0.31753727	6.78057693	1.27788998	0.10083112	0.39445752	1.03350546	1.03350546
ENSG00000197191	CYSRT1	3.01E-12	1.10E-10	2.03617591	0.29182291	4.24143	1.52742687	0.02870214	0.72087625	0.92935471	0.92935471
ENSG00000068001	HYAL2	3.28E-11	9.45E-10	2.03554179	0.30687066	4.28344714	1.83151286	0.03044623	1.02896182	0.93472996	1.02896182
ENSG00000183172	SMDT1	1.90E-11	5.84E-10	2.03549158	0.30320755	4.707831	1.80675865	0.00357252	1.03069417	0.99238301	1.03069417
ENSG00000092841	MYL6	8.66E-10	1.63E-08	2.03490143	0.33182733	8.60218305	2.00729894	0.00094741	1.2377831	0.77577228	1.2377831
ENSG00000087074	PPP1R15A	2.66E-08	3.27E-07	2.03468247	0.36576869	7.12277954	2.26898453	0.00115941	1.50394134	1.00196726	1.50394134
ENSG00000106541	AGR2	1.68E-05	8.92E-05	2.03402959	0.47258403	7.53295783	3.2588285	0.00083091	2.51169533	0.95233048	2.51169533
ENSG00000159714	ZDHHC1	2.56E-07	2.40E-06	2.0319225	0.39429245	5.64203256	2.5066083	0.00547068	1.74352782	1.063802	1.74352782
ENSG00000179091	CYC1	7.71E-11	1.98E-09	2.03168676	0.31227388	6.02183747	1.39282264	0.02986592	0.58632953	1.06717757	1.06717757
ENSG00000136514	RTP4	2.40E-06	1.71E-05	2.03136614	0.43071272	5.57378803	2.83847576	0.00689968	2.08012662	1.06164211	2.08012662
ENSG00000125991	ERGIC3	2.51E-11	7.51E-10	2.03128646	0.30440922	6.73622642	1.71181089	0.0055972	0.93540177	1.03688377	1.03688377
ENSG00000187840	EIF4EBP1	9.53E-11	2.39E-09	2.02847318	0.31331545	4.56402934	1.22713329	0.12902723	0.32115294	0.97534667	0.97534667
ENSG00000204469	PRRC2A	6.95E-06	4.18E-05	2.02711883	0.4509364	3.43129649	3.03237875	0.22639114	2.06122481	0.85753217	2.06122481
ENSG00000132581	SDF2	1.03E-09	1.89E-08	2.02617674	0.33188187	5.36967747	2.00094322	0.0074891	1.23164863	1.05248435	1.23164863
ENSG00000169718	DUS1L	1.61E-10	3.82E-09	2.02594848	0.31681779	6.17239123	1.41104999	0.06451697	0.57473635	1.06468506	1.06468506
ENSG00000184557	SOCS3	1.33E-05	7.30E-05	2.02575771	0.46521483	5.31626602	3.17599606	0.02010097	2.41467846	1.04945688	2.41467846
ENSG00000275118	MBOAT7	1.39E-08	1.86E-07	2.02574828	0.35701839	3.98876662	2.19212156	0.07464313	1.35930586	0.89673506	1.35930586
ENSG00000095739	BAMBI	2.66E-10	5.78E-09	2.02432572	0.32043595	4.74823221	1.91694052	0.01171327	1.1434277	0.99703783	1.1434277
ENSG00000126934	MAP2K2	5.60E-11	1.51E-09	2.02304033	0.30866887	6.20536488	1.56270208	0.00800435	0.78779971	1.06385597	1.06385597
ENSG00000262664	OVCA2	1.83E-08	2.37E-07	2.02264252	0.35942143	4.84826432	2.20876422	0.06389557	1.38942181	1.00869216	1.38942181
ENSG00000084207	GSTP1	6.23E-13	2.72E-11	2.02260122	0.28109943	8.82459156	1.16342838	0.15582301	0.2341679	0.73311697	0.73311697
ENSG00000176101	SSNA1	7.89E-09	1.13E-07	2.02236996	0.35044413	5.74508513	2.13807651	0.00345483	1.37816993	1.06615487	1.37816993
ENSG00000119782	FKBP1B	2.95E-12	1.08E-10	2.02211103	0.2896879	3.70733072	1.70775753	0.03170749	0.91238214	0.86675249	0.91238214
ENSG00000116717	GADD45A	1.18E-11	3.81E-10	2.02114382	0.29796432	4.63981095	1.34744463	0.01402961	0.56429335	0.98477616	0.98477616
ENSG00000126005	MMP24OS	1.84E-10	4.24E-09	2.02054586	0.31697274	5.64941863	1.37726775	0.06629941	0.54282964	1.06400742	1.06400742
ENSG00000260081	MRFAP1P1	5.98E-10	1.16E-08	2.01773942	0.32591219	2.52100795	1.95100938	0.11801557	1.07694545	0.92876367	1.07694545
ENSG00000179673	RPRML	4.36E-07	3.82E-06	2.01689907	0.39917917	1.28604808	2.53789213	0.15816222	1.63445787	0.96536634	1.63445787
ENSG00000101084	RAB5IF	2.86E-10	6.12E-09	2.01667536	0.31978811	6.60667924	1.01626207	0.10469267	0.14023738	1.04578223	1.04578223
ENSG00000100142	POLR2F	2.38E-09	3.98E-08	2.01648298	0.3378087	5.48451015	2.03736685	0.00426118	1.2795294	1.05812107	1.2795294
ENSG00000181444	ZNF467	1.02E-08	1.41E-07	2.01626211	0.35202633	4.45913698	2.14566484	0.02421054	1.369918	0.9602791	1.369918
ENSG00000130193	THEM6	1.21E-09	2.18E-08	2.01596376	0.33160366	5.10303985	1.99103015	0.01115899	1.22590209	1.03489411	1.22590209
ENSG00000239672	NME1	7.00E-11	1.83E-09	2.01519784	0.30904465	5.6971065	1.39000764	0.00927377	0.61700122	1.06519793	1.06519793
ENSG00000275947	TMEM251	4.16E-12	1.47E-10	2.01506058	0.29070706	3.91260766	1.67655023	0.06441757	0.85344771	0.88632661	0.88632661
ENSG00000213853	EMP2	4.39E-11	1.22E-09	2.01492749	0.30574042	6.63378842	1.70815316	0.0075777	0.94253941	1.04404084	1.04404084
ENSG00000108602	ALDH3A1	3.12E-10	6.62E-09	2.01486257	0.32018884	8.29017323	1.90790144	0.10059794	1.05276213	0.83288815	1.05276213
ENSG00000185896	LAMP1	2.38E-11	7.21E-10	2.01427773	0.301523	6.96937195	1.57756873	0.00552605	0.81226298	1.01728027	1.01728027
ENSG00000216490	IFI30	4.85E-09	7.48E-08	2.01426498	0.34419338	7.74443769	2.0838185	0.14704814	1.18572907	0.92224525	1.18572907
ENSG00000100453	GZMB	0.0017676	0.00500985	2.01211642	0.64352035	4.800089	5.35185037	0.02651848	4.63231395	1.00308361	4.63231395
ENSG00000214253	FIS1	1.62E-07	1.61E-06	2.01198357	0.38409757	6.31943962	2.40347149	0.00256925	1.65715388	1.06021008	1.65715388
ENSG00000114902	SPCS1	8.61E-11	2.18E-09	2.01096893	0.309882	6.35296124	1.4440896	0.02139117	0.66320074	1.05891091	1.05891091
ENSG00000140990	NDUFB10	1.05E-07	1.10E-06	2.01085271	0.3781032	6.16376228	2.35207492	0.00232943	1.60599338	1.0648853	1.60599338
ENSG00000099624	ATP5F1D	3.01E-10	6.42E-09	2.0101097	0.31914885	6.08736859	1.51017103	0.0795256	0.67295724	1.06635425	1.06635425
ENSG00000272772		1.11E-06	8.75E-06	2.01010592	0.41270336	6.7900411	2.65410794	0.00477369	1.91137206	1.03276291	1.91137206
ENSG00000070081	NUCB2	5.23E-11	1.44E-09	2.01010001	0.30622146	6.95956842	1.80748484	0.00582889	1.04910141	1.01819499	1.04910141
ENSG00000131669	NINJ1	1.13E-06	8.84E-06	2.00914483	0.41272607	5.65095972	2.65357866	0.00359354	1.91276306	1.06404957	1.91276306
ENSG00000242361	HLA-DMA	1.03E-06	8.18E-06	2.0088234	0.41114879	4.70865764	2.63896099	0.04908264	1.85265477	0.99247742	1.85265477
ENSG00000161055	SCGB3A1	0.00032447	0.00114818	2.00838916	0.55867152	5.09059811	4.22089153	0.02885654	3.48242443	1.0338588	3.48242443
ENSG00000177666	PNPLA2	1.88E-09	3.23E-08	2.0080836	0.33423315	6.16932234	0.94298676	0.19200066	-0.014902	1.06475707	1.06475707
ENSG00000142871	CCN1	5.57E-08	6.30E-07	2.00726321	0.36950963	4.60398342	2.27827236	0.0185756	1.51746977	0.98053046	1.51746977
ENSG00000152669	CCNO	1.62E-07	1.61E-06	2.00554874	0.38289194	5.71357157	2.38831545	0.00465177	1.64466842	1.0655538	1.64466842
ENSG00000115657	ABCB6	2.46E-10	5.43E-09	2.00531309	0.31681464	4.53257257	1.87681052	0.02032913	1.10885043	0.97100236	1.10885043
ENSG00000044574	HSPA5	1.53E-09	2.69E-08	2.00436759	0.33179353	7.91437083	1.9835337	0.00376834	1.2347098	0.89610373	1.2347098
ENSG00000196372	ASB13	1.69E-08	2.21E-07	2.00360496	0.35520341	5.20496243	2.1608126	0.01889523	1.40051122	1.04236332	1.40051122
ENSG00000150556	LYPD6B	2.09E-09	3.54E-08	2.00346021	0.33441056	4.99249159	2.00212195	0.00515908	1.25293318	1.02461938	1.25293318
ENSG00000181029	TRAPPC5	3.23E-07	2.96E-06	2.00345858	0.39212425	5.7385599	2.46584916	0.0230778	1.70673823	1.06603909	1.70673823
ENSG00000149418	ST14	1.56E-10	3.71E-09	2.00308453	0.31300577	6.40411213	0.95225766	0.04546115	0.14495766	1.05673072	1.05673072
ENSG00000179178	TMEM125	1.31E-09	2.35E-08	2.00135358	0.32992228	5.56997391	1.45237782	0.16304041	0.5374658	1.06150762	1.06150762
ENSG00000176485	PLAAT3	7.45E-09	1.08E-07	2.00076188	0.34612692	5.34129832	2.08824241	0.00813626	1.33965703	1.05090699	1.33965703
ENSG00000186352	ANKRD37	7.95E-11	2.03E-09	2.00063061	0.30771215	5.27341615	1.25848169	0.01837698	0.48545126	1.04684913	1.04684913
ENSG00000166562	SEC11C	7.99E-09	1.15E-07	2.00004947	0.34670978	5.56591027	2.09216497	0.00522233	1.34711399	1.06136274	1.34711399
