# Supplementary material for: Upper Airway Epithelial Tissue Transcriptome Analysis Reveals Immune Signatures Associated with COVID-19 Severity in Ghanaians
Source: J Immunol Res. 2024 Feb 12;2024:6668017. doi: 10.1155/2024/6668017 (PMC10876312; doi:10.1155/2024/6668017)
Supplement: Supplementary 7 — Down infected-Ghanaians vs Indians. [file 6668017.f7.txt]

target_id	ext_gene	pval	qval	b	se_b	mean_obs	var_obs	tech_var	sigma_sq	smooth_sigma_sq	final_sigma_sq
ENSG00000105486	LIG1	1.46E-71	2.36E-67	-5.2264538	0.29217759	7.53070319	5.78096622	0.00775146	0.57455954	0.95263567	0.95263567
ENSG00000133026	MYH10	9.07E-68	7.31E-64	-6.7071085	0.38558583	9.85760848	10.2219669	0.00103059	1.67157925	0.52568646	1.67157925
ENSG00000282017		9.12E-60	2.94E-56	-3.261254	0.20001777	11.8496838	2.47045994	3.25E-05	0.45004752	0.18251162	0.45004752
ENSG00000156194	PPEF2	1.80E-57	4.84E-54	-6.9406729	0.43437344	4.45578092	11.2721944	0.11634657	2.00630668	0.95977748	2.00630668
ENSG00000197943	PLCG2	8.10E-56	1.87E-52	-4.8126614	0.30576899	6.68072768	5.26298921	0.01094106	0.85021632	1.040874	1.040874
ENSG00000274600	RIMBP3B	6.46E-55	1.30E-51	-7.9850162	0.51160979	4.30358855	15.0524369	0.37869397	2.56593251	0.93745805	2.56593251
ENSG00000118972	FGF23	1.39E-52	2.24E-49	-4.7075734	0.30847144	5.36226694	5.27800727	0.01610328	1.05438631	1.05207935	1.05438631
ENSG00000130032	PRRG3	3.45E-50	5.05E-47	-4.2244374	0.28357675	3.20127761	4.23397365	0.0449447	0.80054479	0.85973277	0.85973277
ENSG00000102934	PLLP	5.43E-50	7.29E-47	-4.5752814	0.30775609	6.22060691	4.59200821	0.00209186	0.60876988	1.06343854	1.06343854
ENSG00000178338	ZNF354B	4.47E-43	5.15E-40	-6.3613599	0.46232815	5.49903255	10.0800467	0.0216163	2.38304105	1.05874627	2.38304105
ENSG00000147689	FAM83A	3.34E-38	2.99E-35	-5.1968567	0.40214417	6.71292491	6.93821361	0.01761973	1.80172951	1.03859137	1.80172951
ENSG00000253488	SINHCAFP3	8.44E-28	4.12E-25	-6.2319512	0.57025619	2.8588478	11.0018056	0.28171666	3.37669468	0.88745215	3.37669468
ENSG00000249072		1.89E-27	8.47E-25	-2.4926247	0.22963283	10.2535112	1.76788791	0.00012692	0.59309952	0.44737977	0.59309952
ENSG00000162989	KCNJ3	1.98E-26	7.08E-24	-3.7283754	0.35046559	2.42065513	3.93248917	0.44269643	0.86132162	0.93909749	0.93909749
ENSG00000109917	ZPR1	1.36E-25	4.47E-23	-4.5153012	0.43179016	4.96897889	5.94946232	0.18154894	1.91593195	1.02217001	1.91593195
ENSG00000197461	PDGFA	5.66E-25	1.75E-22	-3.0026187	0.29092015	4.32681631	2.15928084	0.01143465	0.43633654	0.94070386	0.94070386
ENSG00000163492	CCDC141	9.86E-25	2.94E-22	-3.268927	0.31837319	2.31272301	2.7985408	0.19274048	0.58135806	0.94757628	0.94757628
ENSG00000184226	PCDH9	1.16E-24	3.41E-22	-3.6842164	0.35937884	2.80823933	4.01650414	0.2848971	1.16807582	0.89349155	1.16807582
ENSG00000230987		1.94E-24	5.29E-22	-3.2281088	0.31640841	4.19751732	2.88155431	0.20199056	0.70799191	0.92429511	0.92429511
ENSG00000241644	INMT	1.81E-23	4.35E-21	-3.202663	0.32080787	1.79238232	2.82581709	0.18832374	0.69670025	0.9695003	0.9695003
ENSG00000143469	SYT14	1.85E-23	4.39E-21	-3.1299166	0.31360097	2.03558938	2.95558879	0.11100889	0.99537876	0.96266632	0.99537876
ENSG00000155657	TTN	1.81E-22	4.12E-20	-2.9670133	0.30425492	2.44249628	2.33824798	0.10439715	0.56665438	0.93702725	0.93702725
ENSG00000180229	HERC2P3	2.12E-22	4.71E-20	-3.292668	0.3382079	1.66719017	3.07037474	0.31608979	0.70431375	0.97073681	0.97073681
ENSG00000165495	PKNOX2	6.27E-21	1.16E-18	-2.8510887	0.30377969	0.69765365	2.27876234	0.10565395	0.63570861	0.93251968	0.93251968
ENSG00000118922	KLF12	3.39E-20	5.74E-18	-2.8094661	0.30517899	3.37517413	2.2949117	0.19070149	0.61278846	0.85705844	0.85705844
ENSG00000184788	SATL1	4.09E-19	5.58E-17	-2.9737276	0.33283464	2.69391065	2.79817197	0.33848931	0.79267912	0.90777333	0.90777333
ENSG00000277157	H4C4	4.87E-19	6.60E-17	-3.6845982	0.4132951	1.96271468	4.47776858	0.15497629	1.76666817	0.9653361	1.76666817
ENSG00000184260	H2AC20	8.98E-19	1.18E-16	-3.1737258	0.35873148	2.64192586	3.34381567	0.14525634	1.30248672	0.9143071	1.30248672
ENSG00000203663	OR2L2	3.39E-18	4.17E-16	-2.8392576	0.32644394	2.09713811	2.71445459	0.23887108	0.95875393	0.95999243	0.95999243
ENSG00000224058		6.18E-18	7.43E-16	-2.5904936	0.30020215	3.66669063	2.24162212	0.14903475	0.82959993	0.8648302	0.8648302
ENSG00000280828		8.70E-18	1.02E-15	-2.951648	0.34361752	1.80947606	2.96703688	0.19312456	1.13519667	0.96921245	1.13519667
ENSG00000197837	H4-16	2.79E-17	2.92E-15	-3.2282422	0.38180577	2.40376659	3.59933934	0.15171739	1.48825865	0.94061862	1.48825865
ENSG00000149212	SESN3	1.02E-16	1.01E-14	-2.378204	0.28646038	2.86912296	1.79448616	0.0369084	0.69147651	0.88626156	0.88626156
ENSG00000232653	GOLGA8N	3.12E-16	2.81E-14	-2.5487816	0.31201678	2.49862835	2.30655507	0.16400213	0.92226538	0.93123566	0.93123566
ENSG00000275713	H2BC9	3.61E-16	3.16E-14	-3.0335469	0.37216445	2.28483216	3.28648281	0.16017816	1.39801861	0.94945092	1.39801861
ENSG00000237296	SMG1P1	3.66E-16	3.19E-14	-2.910791	0.35718056	3.52149595	3.02648362	0.32335587	1.11189606	0.85942116	1.11189606
ENSG00000197714	ZNF460	4.33E-16	3.75E-14	-3.0379397	0.37371732	2.79480398	3.30437792	0.24094696	1.33028022	0.89513551	1.33028022
ENSG00000213889	PPM1N	5.82E-16	4.89E-14	-2.3910121	0.29544266	3.47949377	1.77498173	0.1235913	0.57310457	0.85838033	0.85838033
ENSG00000198298	ZNF485	6.29E-16	5.22E-14	-2.5760731	0.3186802	2.90367157	1.67046015	0.26015147	0.15192497	0.88236559	0.88236559
ENSG00000117020	AKT3	6.45E-16	5.31E-14	-2.398547	0.29683094	3.78133213	1.52283077	0.11948209	0.31371541	0.87173975	0.87173975
ENSG00000166341	DCHS1	1.30E-15	1.02E-13	-2.5845347	0.32330206	1.91448356	1.96613635	0.2090885	0.4952921	0.96680896	0.96680896
ENSG00000203814	H2BC18	1.35E-15	1.05E-13	-3.2366306	0.40510251	3.04295024	3.81242362	0.08783853	1.75837696	0.86889975	1.75837696
ENSG00000163359	COL6A3	2.33E-15	1.76E-13	-2.7739498	0.35014923	2.69454001	2.82315077	0.23802106	1.14127937	0.90769386	1.14127937
ENSG00000065413	ANKRD44	2.77E-15	2.05E-13	-2.5782244	0.32632141	4.00331423	2.44514163	0.11890698	1.07905676	0.89878973	1.07905676
ENSG00000269713	NBPF9	2.96E-15	2.18E-13	-2.4388638	0.3090078	6.63534179	1.34933317	0.03027637	0.18860331	1.04393911	1.04393911
ENSG00000102053	ZC3H12B	3.20E-15	2.33E-13	-2.5207465	0.31977518	1.44014718	2.34248272	0.14358861	1.00679328	0.96915224	1.00679328
ENSG00000275911	NDE1	3.87E-15	2.71E-13	-2.5075443	0.31905794	1.98486127	2.32475726	0.13924256	1.00598456	0.96458146	1.00598456
ENSG00000274290	H2BC6	4.01E-15	2.78E-13	-3.3698482	0.42902205	3.05554534	4.20089343	0.09926809	1.97140598	0.86790363	1.97140598
ENSG00000164604	GPR85	5.73E-15	3.90E-13	-2.3341406	0.29887365	4.19784953	1.70784223	0.08058048	0.59994196	0.92433093	0.92433093
ENSG00000275793	RIMBP3	6.20E-15	4.15E-13	-4.1938977	0.53769211	1.74771438	6.55118405	0.40189025	2.85062876	0.9701169	2.85062876
ENSG00000278229	RPS17	1.02E-14	6.44E-13	-2.8930136	0.37390488	4.10226775	3.14203144	0.11096574	1.4618389	0.91260796	1.4618389
ENSG00000135702	CHST5	1.54E-14	9.40E-13	-2.3126335	0.30096083	3.49873417	1.66834175	0.16017214	0.49955341	0.85882388	0.85882388
ENSG00000251079	BMS1P2	1.72E-14	1.02E-12	-3.0160804	0.3932497	1.8038652	3.44482053	0.22276968	1.51699023	0.96931011	1.51699023
ENSG00000133131	MORC4	1.73E-14	1.02E-12	-2.5152439	0.3279504	4.8989931	1.97337035	0.19545491	0.58482556	1.0144991	1.0144991
ENSG00000169432	SCN9A	2.10E-14	1.23E-12	-2.4692791	0.32302953	2.3421621	2.25675664	0.22840499	0.8845877	0.94551089	0.94551089
ENSG00000134532	SOX5	2.67E-14	1.52E-12	-2.4725141	0.32475894	2.06642171	2.33208515	0.14223673	1.0442824	0.96137496	1.0442824
ENSG00000130338	TULP4	2.91E-14	1.64E-12	-2.2098121	0.29068554	3.29628916	1.31859429	0.09316619	0.3009766	0.85743723	0.85743723
ENSG00000233822	H2BC15	3.89E-14	2.15E-12	-2.4038517	0.3177716	2.40290748	2.21859016	0.11031847	1.02569294	0.94069405	1.02569294
ENSG00000067798	NAV3	4.90E-14	2.66E-12	-2.4493769	0.3250863	2.87509406	2.30194995	0.30333635	0.87461653	0.88557604	0.88557604
ENSG00000257315	ZBED6	5.21E-14	2.81E-12	-4.5276315	0.60155551	1.87059262	7.91081893	0.62411479	3.44691178	0.96794695	3.44691178
ENSG00000134982	APC	8.93E-14	4.67E-12	-2.2098076	0.29638671	4.19248516	1.45440748	0.0645092	0.46779226	0.92374799	0.92374799
ENSG00000079841	RIMS1	1.15E-13	5.92E-12	-2.8713082	0.38684526	4.13527612	3.22704684	0.0307642	1.65278994	0.91693384	1.65278994
ENSG00000137502	RAB30	1.53E-13	7.72E-12	-2.370231	0.32098245	1.70152854	1.88252935	0.18853507	0.63675434	0.97054941	0.97054941
ENSG00000240590	RPSAP48	1.59E-13	7.97E-12	-2.561226	0.34709095	1.67861354	2.5831644	0.23979584	1.11551558	0.97068712	1.11551558
ENSG00000169629	RGPD8	3.31E-13	1.54E-11	-2.5021096	0.3436341	2.60052653	2.49968275	0.22366501	1.10478442	0.91941714	1.10478442
ENSG00000148773	MKI67	3.69E-13	1.70E-11	-2.2251479	0.30621551	1.31938535	1.66265064	0.08852339	0.64241542	0.96636589	0.96636589
ENSG00000173889	PHC3	3.77E-13	1.74E-11	-2.1065712	0.29002502	3.52407002	1.06314608	0.08679478	0.13393185	0.8594935	0.8594935
ENSG00000164061	BSN	3.83E-13	1.76E-11	-2.5649215	0.35322539	1.92265474	2.63428786	0.24013758	1.1635044	0.96657585	1.1635044
ENSG00000100503	NIN	4.08E-13	1.86E-11	-2.2065148	0.30422312	4.54390707	1.64734746	0.06861629	0.66277236	0.97259044	0.97259044
ENSG00000156218	ADAMTSL3	4.30E-13	1.95E-11	-2.1206558	0.29267937	3.55145967	1.60036247	0.10336762	0.65228927	0.86032107	0.86032107
ENSG00000144649	GASK1A	4.53E-13	2.05E-11	-2.4129683	0.33334758	6.33102766	2.09352081	0.19033422	0.80993384	1.05977262	1.05977262
ENSG00000188738	FSIP2	5.78E-13	2.55E-11	-2.8673308	0.39793367	3.38233142	3.31893222	0.26685453	1.51459654	0.85708618	1.51459654
ENSG00000204179	PTPN20	6.23E-13	2.72E-11	-2.4184866	0.33611432	2.1309381	2.36469313	0.28362785	0.98731652	0.95836008	0.98731652
ENSG00000136928	GABBR2	7.16E-13	3.08E-11	-2.1563562	0.30047757	0.40360269	1.30086144	0.10922619	0.31214903	0.90649998	0.90649998
ENSG00000104164	BLOC1S6	8.12E-13	3.45E-11	-2.1960947	0.30675799	4.23204013	1.23003923	0.13040961	0.18537408	0.92822064	0.92822064
ENSG00000185261	KIAA0825	9.28E-13	3.84E-11	-2.3302124	0.32632534	4.94490656	1.32989679	0.17840334	0.12121134	1.01958922	1.01958922
ENSG00000058404	CAMK2B	1.01E-12	4.15E-11	-2.8667473	0.40208741	3.09092007	3.35504531	0.35551303	1.4633227	0.86534188	1.4633227
ENSG00000130635	COL5A1	1.34E-12	5.39E-11	-2.1139323	0.29814008	0.79840543	1.83176946	0.05992089	0.93665521	0.94006358	0.94006358
ENSG00000080573	COL5A3	1.36E-12	5.45E-11	-2.6713778	0.37687987	1.31601726	2.93157626	0.12148137	1.47645106	0.96626938	1.47645106
ENSG00000081052	COL4A4	1.59E-12	6.26E-11	-2.3687429	0.33522732	1.32123888	1.80476878	0.29782669	0.44972931	0.96641857	0.96641857
ENSG00000282331	LRRC37A4P	1.77E-12	6.84E-11	-3.2969871	0.46756122	2.63385268	4.49041006	0.61368053	1.84572124	0.91531237	1.84572124
ENSG00000132464	ENAM	1.77E-12	6.84E-11	-2.23964	0.3176021	1.31195965	2.02925424	0.16864802	0.92266477	0.96615177	0.96615177
ENSG00000204767	INSYN2B	1.99E-12	7.63E-11	-2.4378981	0.34654213	1.20911375	2.46139532	0.14502298	1.20600579	0.96268721	1.20600579
ENSG00000283761		2.22E-12	8.39E-11	-2.485481	0.35407295	2.08411417	2.56441649	0.41238753	0.99799859	0.96059035	0.99799859
ENSG00000206356		2.46E-12	9.16E-11	-2.5317164	0.36139316	2.00905973	2.66657017	0.2478879	1.22141854	0.96370034	1.22141854
ENSG00000124406	ATP8A1	2.54E-12	9.40E-11	-2.1156398	0.30218275	2.37303099	1.54922979	0.08409372	0.62367052	0.94319342	0.94319342
ENSG00000185008	ROBO2	4.08E-12	1.45E-10	-2.6806991	0.38657224	2.08550761	3.02292406	0.61825277	1.06292579	0.96052721	1.06292579
ENSG00000134242	PTPN22	4.13E-12	1.46E-10	-2.1528586	0.31054441	4.02803448	1.74839297	0.18263326	0.69691299	0.90229233	0.90229233
ENSG00000094661	OR1I1	4.48E-12	1.57E-10	-2.0335062	0.29380746	3.2115543	1.47534269	0.11175262	0.586951	0.85937916	0.85937916
ENSG00000080603	SRCAP	8.54E-12	2.85E-10	-2.1907301	0.32078854	4.95461643	1.72977437	0.13704604	0.69165366	1.02063845	1.02063845
ENSG00000288121	MDN1	1.05E-11	3.44E-10	-2.8779326	0.42324124	2.70304314	3.56038065	0.68154147	1.33370646	0.90662004	1.33370646
ENSG00000173285	OR10K1	1.18E-11	3.81E-10	-2.3325928	0.34389344	1.76316289	2.34538205	0.2748702	1.05558518	0.96992577	1.05558518
ENSG00000074706	IPCEF1	1.42E-11	4.49E-10	-2.1384057	0.31651738	1.74325353	1.53661592	0.15689386	0.51925399	0.97016774	0.97016774
ENSG00000231752	EMBP1	1.70E-11	5.30E-10	-2.2220009	0.33017915	2.2162768	1.73362617	0.27273616	0.53311646	0.95371939	0.95371939
ENSG00000116147	TNR	1.87E-11	5.76E-10	-2.2349255	0.33277399	1.53261867	2.17710889	0.14417683	1.1016316	0.97038288	1.1016316
ENSG00000198265	HELZ	2.33E-11	7.06E-10	-1.9495661	0.29167903	2.88950727	1.05154947	0.07317065	0.25928328	0.88394174	0.88394174
ENSG00000243156	MICAL3	3.22E-11	9.28E-10	-1.9534805	0.29436165	4.3420734	1.4086444	0.03191377	0.66082852	0.94288502	0.94288502
ENSG00000186723	OR10H1	3.33E-11	9.55E-10	-2.1403059	0.32275295	2.29187873	2.02552221	0.12478028	1.04712625	0.94898484	1.04712625
ENSG00000162992	NEUROD1	3.51E-11	1.00E-09	-2.4947685	0.37665739	2.02051587	2.75574961	0.15581817	1.44022819	0.96326256	1.44022819
ENSG00000105926	PALS2	4.49E-11	1.25E-09	-2.0622694	0.3130838	2.61492112	1.30758414	0.18508741	0.32011467	0.91765409	0.91765409
ENSG00000197566	ZNF624	5.72E-11	1.54E-09	-1.9390746	0.29600069	2.98099903	1.35220345	0.1113058	0.53489913	0.87437878	0.87437878
ENSG00000177570	SAMD12	7.15E-11	1.86E-09	-1.9548392	0.29993918	4.11606109	1.72359154	0.03635818	0.97573131	0.91444344	0.97573131
ENSG00000214425	LRRC37A4P	7.27E-11	1.89E-09	-2.3034402	0.35356399	3.55514717	2.3942043	0.09415925	1.31217508	0.86044035	1.31217508
ENSG00000263142	LRRC37A17P	8.03E-11	2.04E-09	-2.2325271	0.34345891	2.00995345	2.25497488	0.22302402	1.10407121	0.96366667	1.10407121
ENSG00000166086	JAM3	8.18E-11	2.08E-09	-2.3694659	0.36468745	1.3089227	2.54139241	0.25805034	1.23816523	0.96606279	1.23816523
ENSG00000284369	COG5	9.35E-11	2.36E-09	-2.0931614	0.32316652	1.8022183	1.99042007	0.17130338	1.00360837	0.96933818	1.00360837
ENSG00000144218	AFF3	9.53E-11	2.39E-09	-2.3171662	0.35790925	1.69632443	2.44048789	0.14056562	1.30054851	0.97058514	1.30054851
ENSG00000111860	CEP85L	9.84E-11	2.45E-09	-1.9563653	0.30240349	2.83204147	1.74114568	0.06735257	0.96143598	0.89061786	0.96143598
ENSG00000236539	HNRNPA1P54	1.03E-10	2.56E-09	-2.012647	0.31146339	4.46217158	1.38415886	0.13062407	0.49169418	0.96073219	0.96073219
ENSG00000180596	H2BC4	1.20E-10	2.95E-09	-2.0585706	0.31970409	4.66869522	1.54884326	0.16190274	0.59167453	0.98796766	0.98796766
ENSG00000081189	MEF2C	1.23E-10	3.00E-09	-1.9258855	0.29926198	3.0633121	1.68713918	0.14021364	0.85658927	0.86731083	0.86731083
ENSG00000184206	GOLGA6L4	1.49E-10	3.58E-09	-2.3603807	0.36846129	1.90408638	2.56379737	0.31168468	1.21565723	0.96709592	1.21565723
ENSG00000139174	PRICKLE1	1.52E-10	3.64E-09	-2.3418178	0.36574276	3.37020088	2.52507985	0.54280229	0.96208511	0.85704499	0.96208511
ENSG00000229413		1.52E-10	3.64E-09	-2.3408886	0.36559143	2.79142798	2.52302629	0.11001361	1.39362874	0.89555078	1.39362874
ENSG00000100077	GRK3	1.66E-10	3.91E-09	-1.9460497	0.30454607	4.36040473	1.3563823	0.09787044	0.54732914	0.94554806	0.94554806
ENSG00000132639	SNAP25	1.66E-10	3.92E-09	-2.0593012	0.32228805	2.58952993	1.95733934	0.07213587	1.09639698	0.92075207	1.09639698
ENSG00000145348	TBCK	1.70E-10	3.97E-09	-1.9464305	0.30476562	3.25244193	1.25409766	0.18669271	0.35417115	0.85823074	0.85823074
ENSG00000119737	GPR75	1.74E-10	4.05E-09	-2.0650253	0.32353196	1.5850176	1.88846138	0.20684514	0.88704301	0.97072529	0.97072529
ENSG00000113249	HAVCR1	1.89E-10	4.35E-09	-1.9692836	0.30913962	0.93303249	1.44202267	0.12617049	0.58850129	0.94896167	0.94896167
ENSG00000124212	PTGIS	1.90E-10	4.35E-09	-2.0176497	0.31677573	1.25047452	1.76092614	0.16471054	0.8369602	0.9641917	0.9641917
ENSG00000170456	DENND5B	2.24E-10	5.01E-09	-1.9166251	0.30211481	2.07597004	1.67260048	0.06586982	0.92304563	0.96095548	0.96095548
ENSG00000177201	OR2T12	2.49E-10	5.47E-09	-2.541365	0.40161793	2.15748045	3.01533552	0.33188516	1.48270562	0.95699651	1.48270562
ENSG00000006071	ABCC8	2.72E-10	5.90E-09	-2.0188786	0.31974966	3.74641362	1.90788211	0.25811416	0.89208408	0.86902594	0.89208408
ENSG00000213694	S1PR3	2.83E-10	6.09E-09	-2.4639542	0.39063546	2.5314333	2.84522827	0.15853858	1.55816711	0.92758489	1.55816711
ENSG00000165478	HEPACAM	3.08E-10	6.54E-09	-1.9821889	0.3148883	1.22993196	1.72217461	0.15202674	0.83773588	0.96346301	0.96346301
ENSG00000111886	GABRR2	3.14E-10	6.64E-09	-2.0307345	0.322768	1.0884834	1.61244828	0.21455168	0.62580641	0.95746414	0.95746414
ENSG00000138641	HERC3	3.37E-10	7.05E-09	-1.9696042	0.31358461	2.76552499	1.35372541	0.20751041	0.41709676	0.89876181	0.89876181
ENSG00000277518	MUC6	3.46E-10	7.22E-09	-1.7975561	0.28639066	0.12858613	0.9984096	0.05120141	0.33767923	0.8715192	0.8715192
ENSG00000105492	SIGLEC6	3.90E-10	8.02E-09	-2.1309853	0.34051579	1.91487712	2.1482269	0.14843679	1.156012	0.96679789	1.156012
ENSG00000166436	TRIM66	4.59E-10	9.33E-09	-2.0139439	0.32313359	2.39083337	1.37452289	0.23293877	0.37856449	0.94173354	0.94173354
ENSG00000160117	ANKLE1	4.78E-10	9.68E-09	-1.9329524	0.31046288	2.72056568	1.3875136	0.17994826	0.50677369	0.90440771	0.90440771
ENSG00000099617	EFNA2	4.86E-10	9.80E-09	-2.4212821	0.38904716	1.70470687	2.79178347	0.23262492	1.47014916	0.97052629	1.47014916
ENSG00000115232	ITGA4	5.05E-10	1.01E-08	-2.0188012	0.32468708	2.63677188	1.94301172	0.05409367	1.13190045	0.91494929	1.13190045
ENSG00000165995	CACNB2	5.27E-10	1.04E-08	-2.0261009	0.32621797	3.62481104	1.53707457	0.33418795	0.43314295	0.8630164	0.8630164
ENSG00000184305	CCSER1	5.34E-10	1.05E-08	-1.9482163	0.31377868	2.01374896	1.31134566	0.14411917	0.45363073	0.96352276	0.96352276
ENSG00000008277	ADAM22	5.54E-10	1.09E-08	-2.0953254	0.33778678	1.80241587	2.09901797	0.14293765	1.14068632	0.96933483	1.14068632
ENSG00000172421	EFCAB3	5.72E-10	1.12E-08	-2.4095264	0.38876257	2.00644042	2.77850683	0.2552676	1.44501614	0.96379857	1.44501614
ENSG00000188558	OR2G6	6.36E-10	1.23E-08	-2.4516444	0.39662833	1.81480313	2.88586793	0.16121643	1.60856643	0.96911685	1.60856643
ENSG00000187627	RGPD1	6.65E-10	1.28E-08	-2.9186686	0.47272839	2.2348816	4.09576461	0.34329454	2.17076689	0.95260867	2.17076689
ENSG00000168542	COL3A1	7.18E-10	1.37E-08	-2.2361465	0.36288303	1.29620809	2.40979354	0.12854346	1.35290255	0.96568139	1.35290255
ENSG00000123104	ITPR2	7.45E-10	1.42E-08	-1.9094716	0.31016749	1.71845812	1.75917712	0.10622242	0.97607116	0.97041497	0.97607116
ENSG00000225840		8.58E-10	1.62E-08	-3.4459689	0.56180536	10.968286	5.7548453	6.66E-05	3.55071755	0.31613996	3.55071755
ENSG00000138376	BARD1	8.88E-10	1.66E-08	-1.8715414	0.30539017	2.50979231	1.08518141	0.11919759	0.30529718	0.93001288	0.93001288
ENSG00000115020	PIKFYVE	9.30E-10	1.73E-08	-1.710705	0.27947891	3.34619191	1.32783103	0.02167143	0.7614109	0.85704875	0.85704875
ENSG00000149311	ATM	9.68E-10	1.79E-08	-1.9469868	0.31841533	5.16018124	1.07386598	0.10139593	0.25570874	1.03922269	1.03922269
ENSG00000135837	CEP350	9.69E-10	1.79E-08	-1.8221837	0.29801577	3.57123667	0.82938164	0.13816886	0.06147841	0.86098185	0.86098185
ENSG00000110395	CBL	1.07E-09	1.97E-08	-1.7668737	0.28973013	3.76515555	1.19566975	0.07395748	0.53679741	0.87040743	0.87040743
ENSG00000144406	UNC80	1.08E-09	1.99E-08	-1.9275725	0.31617958	4.43258832	1.4302916	0.1683567	0.56590931	0.9563005	0.9563005
ENSG00000136231	IGF2BP3	1.09E-09	2.00E-08	-1.8627868	0.30560017	1.13685604	1.49231754	0.09094779	0.75404395	0.9597062	0.9597062
ENSG00000151388	ADAMTS12	1.13E-09	2.07E-08	-1.9805571	0.32524075	1.07720803	1.91782682	0.15185623	1.03818617	0.95691353	1.03818617
ENSG00000188582	PAQR9	1.14E-09	2.08E-08	-1.9177151	0.31496369	0.78586524	1.79835152	0.05960765	1.05641629	0.93916504	1.05641629
ENSG00000172146	OR1A1	1.15E-09	2.09E-08	-2.3785402	0.3907158	2.84732383	2.76705497	0.1924063	1.52500559	0.88880301	1.52500559
ENSG00000274803	BDP1	1.18E-09	2.15E-08	-1.9727834	0.32432889	3.77425054	1.90541623	0.06729513	1.11608367	0.87114111	1.11608367
ENSG00000166446	CDYL2	1.26E-09	2.27E-08	-2.1514547	0.35427707	2.58648458	2.27068239	0.12373728	1.28827547	0.92111976	1.28827547
ENSG00000248905	FMN1	1.30E-09	2.34E-08	-1.7650014	0.29090314	3.00707184	1.20899575	0.08006607	0.54552723	0.87196112	0.87196112
ENSG00000150477	KIAA1328	1.33E-09	2.37E-08	-1.9679802	0.32452181	4.84546235	1.20563998	0.1764194	0.29878952	1.00836764	1.00836764
ENSG00000080224	EPHA6	1.33E-09	2.38E-08	-1.8776563	0.30967543	0.73855663	1.73282943	0.10791387	0.97094842	0.93567118	0.97094842
ENSG00000188596	CFAP54	1.45E-09	2.57E-08	-1.9702314	0.32568126	4.88592703	1.1870978	0.18024993	0.27437747	1.01301824	1.01301824
ENSG00000060237	WNK1	1.97E-09	3.36E-08	-1.7814027	0.29687118	4.53396207	0.77911772	0.02029232	0.15672912	0.9711983	0.9711983
ENSG00000126787	DLGAP5	2.04E-09	3.48E-08	-1.9175485	0.31989524	1.57465323	1.83285463	0.07302361	1.07822221	0.97067813	1.07822221
ENSG00000275131	PDE4DIPP2	2.06E-09	3.51E-08	-2.5698633	0.42883203	2.35022816	3.29305005	0.16859156	1.90024863	0.94492936	1.90024863
ENSG00000188215	DCUN1D3	2.10E-09	3.56E-08	-1.8974658	0.31677479	4.67903045	1.73516102	0.13977313	0.92695558	0.98912238	0.98912238
ENSG00000074047	GLI2	2.14E-09	3.62E-08	-1.9079433	0.31867961	2.73304183	1.5447038	0.23967786	0.62557622	0.90283493	0.90283493
ENSG00000278677	H2AC17	2.36E-09	3.96E-08	-2.3449449	0.39274832	2.25895291	2.75440777	0.1400919	1.59523458	0.95111891	1.59523458
ENSG00000133316	WDR74	2.41E-09	4.03E-08	-2.3691254	0.39702973	6.69694118	2.81353845	0.0448465	1.72852029	1.03973572	1.72852029
ENSG00000077157	PPP1R12B	2.54E-09	4.20E-08	-1.6919123	0.28392958	3.34653794	1.39008169	0.04988222	0.80892704	0.85704787	0.85704787
ENSG00000133138	TBC1D8B	2.57E-09	4.23E-08	-1.9089985	0.32045158	4.027441	1.83055606	0.23290937	0.92234429	0.90220826	0.92234429
ENSG00000081148	IMPG2	3.19E-09	5.18E-08	-2.1954277	0.37074733	1.66065586	2.43919267	0.19027729	1.35607548	0.97075958	1.35607548
ENSG00000177311	ZBTB38	3.27E-09	5.30E-08	-1.7691503	0.29897977	3.62586436	1.09566781	0.1425654	0.36490194	0.86305975	0.86305975
ENSG00000075340	ADD2	3.30E-09	5.33E-08	-1.8310758	0.30951121	1.04636915	1.68595802	0.12236429	0.94232692	0.95535407	0.95535407
ENSG00000180747	SMG1P3	3.31E-09	5.35E-08	-2.2101285	0.37362725	3.95717492	2.47525025	0.0770435	1.49342636	0.89232488	1.49342636
ENSG00000166377	ATP9B	3.37E-09	5.42E-08	-1.8264566	0.30890921	3.90278237	0.86183767	0.18847553	0.04116339	0.88505456	0.88505456
ENSG00000171303	KCNK3	3.46E-09	5.56E-08	-2.008245	0.33992061	1.40454834	2.04687406	0.22348446	1.07640829	0.96846823	1.07640829
ENSG00000121570	DPPA4	3.49E-09	5.60E-08	-3.0880541	0.52280207	2.5420369	4.84107609	0.23723762	2.83763498	0.92636963	2.83763498
ENSG00000250299	MRPS31P4	3.51E-09	5.62E-08	-2.0375074	0.34500505	1.98209048	2.10796178	0.3738219	0.96524852	0.96467858	0.96524852
ENSG00000100578	KIAA0586	3.57E-09	5.71E-08	-1.9792266	0.33530225	5.8126606	1.09554415	0.19772355	0.15688085	1.06708692	1.06708692
ENSG00000157106	SMG1	3.59E-09	5.73E-08	-1.854644	0.31423283	4.78442437	0.89716372	0.10959658	0.13585147	1.00125399	1.00125399
ENSG00000164038	SLC9B2	3.63E-09	5.79E-08	-1.9407417	0.32893464	1.60582647	1.91478092	0.14305375	1.07417369	0.97078918	1.07417369
ENSG00000168172	HOOK3	3.65E-09	5.81E-08	-1.8065717	0.30623281	2.88714679	0.93970668	0.17080116	0.15206187	0.88420735	0.88420735
ENSG00000158816	VWA5B1	3.67E-09	5.84E-08	-1.9278877	0.32685351	1.64380067	1.8902055	0.18856847	1.01330523	0.97079935	1.01330523
ENSG00000082805	ERC1	3.68E-09	5.84E-08	-1.8600218	0.31535625	4.6944975	1.00538408	0.12794139	0.22371807	0.99086623	0.99086623
ENSG00000269113	TRABD2B	3.73E-09	5.92E-08	-2.2097408	0.3748081	1.64560903	2.48469766	0.30735753	1.27305499	0.97079639	1.27305499
ENSG00000237440	ZNF737	3.85E-09	6.10E-08	-1.8008872	0.30573722	1.83621985	1.242743	0.08289233	0.55220936	0.96870423	0.96870423
ENSG00000135913	USP37	4.05E-09	6.40E-08	-1.7847777	0.30342838	2.12951952	1.26624476	0.07734288	0.59286984	0.95843093	0.95843093
ENSG00000258989		4.13E-09	6.50E-08	-2.7281966	0.46405569	1.81093069	3.80082633	0.44854296	1.97411853	0.96918662	1.97411853
ENSG00000181458	TMEM45A	4.28E-09	6.71E-08	-1.9843386	0.33786833	3.16308012	2.01329051	0.02556504	1.25867881	0.86128594	1.25867881
ENSG00000042781	USH2A	4.27E-09	6.71E-08	-2.0033732	0.34110269	1.6783698	2.05205049	0.09585576	1.21309346	0.97068831	1.21309346
ENSG00000060749	QSER1	4.43E-09	6.92E-08	-1.6785464	0.28608338	3.45495131	1.44237445	0.03312885	0.88761278	0.85790006	0.88761278
ENSG00000130856	ZNF236	4.63E-09	7.21E-08	-1.8793539	0.32072012	2.79890255	1.81104634	0.15007717	1.00711351	0.8946325	1.00711351
ENSG00000033122	LRRC7	4.69E-09	7.26E-08	-1.9301766	0.32950751	1.13890343	1.6168074	0.26167421	0.6603748	0.95979677	0.95979677
ENSG00000186103	ARGFX	4.68E-09	7.26E-08	-1.8977831	0.32396145	3.00051038	1.7933224	0.30814404	0.81751524	0.87255493	0.87255493
ENSG00000146021	KLHL3	4.73E-09	7.31E-08	-1.8280209	0.31213411	2.98838538	1.33475429	0.22238338	0.487217	0.87367831	0.87367831
ENSG00000115827	DCAF17	4.89E-09	7.53E-08	-1.8245402	0.3118457	2.55662306	1.07044266	0.1693641	0.27383355	0.92467295	0.92467295
ENSG00000118193	KIF14	5.32E-09	8.12E-08	-2.1073895	0.3610437	2.01852196	2.288429	0.17300824	1.293458	0.96333971	1.293458
ENSG00000109670	FBXW7	5.74E-09	8.67E-08	-1.752357	0.30087054	4.01335665	1.10547978	0.11817247	0.41074671	0.90021217	0.90021217
ENSG00000152495	CAMK4	6.10E-09	9.10E-08	-2.0007135	0.34412723	1.35393643	2.07294037	0.14350859	1.18875637	0.96729747	1.18875637
ENSG00000214837	LINC01347	6.52E-09	9.64E-08	-1.910656	0.32926786	1.04390069	1.89511232	0.22625547	0.99343944	0.95522587	0.99343944
ENSG00000101445	PPP1R16B	6.56E-09	9.68E-08	-1.9449654	0.33523947	4.3692664	1.9642213	0.09381412	1.17052276	0.94684932	1.17052276
ENSG00000166263	STXBP4	6.57E-09	9.68E-08	-1.7350867	0.29907578	2.88341682	1.35941931	0.12164237	0.677277	0.88462872	0.88462872
ENSG00000091831	ESR1	6.71E-09	9.86E-08	-1.9564823	0.33744503	1.51221801	1.98919705	0.22387341	1.05715448	0.97017976	1.05715448
ENSG00000151320	AKAP6	6.87E-09	1.01E-07	-1.7293474	0.29846506	2.60953781	1.10901813	0.08385026	0.46420738	0.91831537	0.91831537
ENSG00000176438	SYNE3	6.90E-09	1.01E-07	-1.7261597	0.29796184	3.16510138	1.4697541	0.13759506	0.77955465	0.86119411	0.86119411
ENSG00000107611	CUBN	7.02E-09	1.03E-07	-1.7334274	0.29935574	0.70176489	1.14457231	0.07531403	0.50617041	0.93284186	0.93284186
ENSG00000187862	TTC24	7.11E-09	1.04E-07	-1.7699747	0.30578632	1.10220576	1.58037724	0.0938143	0.9061536	0.95812002	0.95812002
ENSG00000066739	ATG2B	7.83E-09	1.13E-07	-1.7663539	0.3060162	2.04818072	0.9017056	0.09136594	0.22071273	0.9621506	0.9621506
ENSG00000056277	ZNF280C	7.93E-09	1.14E-07	-1.783426	0.3090892	2.30247246	1.51373632	0.12650694	0.79639992	0.94827454	0.94827454
ENSG00000278828	H3C10	8.14E-09	1.16E-07	-2.6535327	0.46023816	3.04454818	3.68518496	0.28306719	2.09989846	0.86877103	2.09989846
ENSG00000282046	GREM1	8.27E-09	1.18E-07	-1.7989357	0.31215817	1.26386995	1.60623774	0.13158363	0.87464257	0.96464704	0.96464704
ENSG00000166923	GREM1	8.27E-09	1.18E-07	-1.7989357	0.31215817	1.26386995	1.60623774	0.13158363	0.87464257	0.96464704	0.96464704
ENSG00000185278	ZBTB37	8.50E-09	1.21E-07	-1.6932884	0.29406165	3.23774223	0.92346814	0.11421597	0.26903117	0.85859689	0.85859689
ENSG00000130226	DPP6	8.60E-09	1.22E-07	-1.7579424	0.30540102	1.17962587	1.29289415	0.08776061	0.62800127	0.96152446	0.96152446
ENSG00000143195	ILDR2	8.72E-09	1.23E-07	-1.7606356	0.30599273	0.76617219	1.51562404	0.11562438	0.82486948	0.93773055	0.93773055
ENSG00000183598	H3C13	9.00E-09	1.27E-07	-2.1935313	0.38157642	1.47404686	2.52770575	0.18527296	1.45273337	0.96969545	1.45273337
ENSG00000162512	SDC3	9.04E-09	1.27E-07	-1.687025	0.29350429	4.39224186	1.14986965	0.01887318	0.59878559	0.95025545	0.95025545
ENSG00000272595	OR10AH1P	9.13E-09	1.28E-07	-2.00908	0.34963993	2.55363021	1.81280923	0.45026755	0.61087411	0.92502333	0.92502333
ENSG00000269825		9.18E-09	1.29E-07	-2.0150657	0.35073495	2.66676675	2.13470851	0.09887014	1.28504868	0.91119495	1.28504868
ENSG00000140538	NTRK3	9.43E-09	1.32E-07	-1.9243601	0.3352122	1.46348208	1.94881664	0.1680227	1.09610852	0.96953753	1.09610852
ENSG00000253223		9.87E-09	1.37E-07	-2.1391037	0.3731289	1.32166829	2.41223354	0.14738042	1.41890278	0.96643073	1.41890278
ENSG00000140009	ESR2	1.06E-08	1.46E-07	-1.8108386	0.31652387	2.79265114	1.36586432	0.2317076	0.52166673	0.89540023	0.89540023
ENSG00000137265	IRF4	1.07E-08	1.47E-07	-1.8996122	0.33216268	1.71566217	1.90826415	0.04164911	1.19958641	0.97043909	1.19958641
ENSG00000186526	CYP4F8	1.07E-08	1.47E-07	-1.7593702	0.30765613	0.97897596	1.57739977	0.11316156	0.89103712	0.95167678	0.95167678
ENSG00000135870	RC3H1	1.10E-08	1.50E-07	-1.7233167	0.30153073	4.34516252	0.84735655	0.07952803	0.20639539	0.94333077	0.94333077
ENSG00000160856	FCRL3	1.10E-08	1.51E-07	-2.7736164	0.48541409	3.55210995	4.07274866	0.59736346	2.05343844	0.86034197	2.05343844
ENSG00000198625	MDM4	1.20E-08	1.63E-07	-1.9235485	0.33751104	5.25699334	0.95452019	0.23572078	0.01757669	1.04580837	1.04580837
ENSG00000085840	ORC1	1.26E-08	1.70E-07	-1.8168849	0.31925804	2.38007209	1.73466316	0.2040374	0.92023983	0.94262665	0.94262665
ENSG00000146006	LRRTM2	1.36E-08	1.82E-07	-1.8794388	0.33099368	1.11028578	1.88515403	0.25216414	0.98035005	0.95849888	0.98035005
ENSG00000100393	EP300	1.38E-08	1.84E-07	-1.6168361	0.2848573	3.27427928	0.73130348	0.05508577	0.18176969	0.85778067	0.85778067
ENSG00000104490	NCALD	1.47E-08	1.95E-07	-1.6828249	0.29704259	4.46559098	1.08441764	0.03139377	0.52242987	0.96124211	0.96124211
ENSG00000066813	ACSM2B	1.61E-08	2.12E-07	-1.9076999	0.33768516	1.99274662	1.92299226	0.31855096	0.93169393	0.96430083	0.96430083
ENSG00000163864	NMNAT3	1.62E-08	2.13E-07	-1.8138341	0.32110296	4.31347179	1.76762414	0.03360002	1.12635498	0.93882709	1.12635498
ENSG00000119969	HELLS	1.65E-08	2.16E-07	-1.7790725	0.31512401	3.89615579	1.37197259	0.23295123	0.54875602	0.88420909	0.88420909
ENSG00000188211	NCR3LG1	1.72E-08	2.25E-07	-1.7854945	0.31671304	2.06721919	1.69269437	0.16711513	0.93640341	0.96134028	0.96134028
ENSG00000077264	PAK3	1.82E-08	2.36E-07	-1.9878162	0.35318232	1.16314982	2.13296237	0.13646454	1.26683514	0.96084241	1.26683514
ENSG00000176695	OR4F17	1.92E-08	2.48E-07	-2.8753475	0.5116891	3.85736885	4.47206875	0.3929106	2.55262897	0.87949285	2.55262897
ENSG00000266338	NBPF15	1.95E-08	2.52E-07	-1.8236339	0.32471301	4.07965972	1.45004522	0.27665413	0.55333229	0.90952946	0.90952946
ENSG00000214558		2.12E-08	2.71E-07	-1.973698	0.35232911	1.57947968	2.11564072	0.25241896	1.14410884	0.97070136	1.14410884
ENSG00000165300	SLITRK5	2.17E-08	2.76E-07	-1.7896046	0.31969138	1.82914867	1.48556352	0.18093356	0.70903274	0.96884548	0.96884548
ENSG00000151693	ASAP2	2.31E-08	2.92E-07	-1.6790128	0.30053228	3.68814198	1.38493824	0.1502697	0.71174172	0.8658264	0.8658264
ENSG00000162139	NEU3	2.35E-08	2.96E-07	-1.6583166	0.29698502	2.62742568	1.08557564	0.07614118	0.4947434	0.91610997	0.91610997
ENSG00000171320	ESCO2	2.36E-08	2.97E-07	-1.7757734	0.31805212	1.05011589	1.04051336	0.18247027	0.2643377	0.9555477	0.9555477
ENSG00000115825	PRKD3	2.37E-08	2.98E-07	-1.6514302	0.29581887	2.91180192	0.87095461	0.10299896	0.25398512	0.88147511	0.88147511
ENSG00000106692	FKTN	2.46E-08	3.08E-07	-1.6800641	0.30129594	3.53109925	1.04490273	0.16157061	0.35385766	0.85969587	0.85969587
ENSG00000278301	GRAMD4P3	2.59E-08	3.21E-07	-2.0200911	0.36286772	2.01395179	2.2343265	0.20094681	1.28037427	0.96351503	1.28037427
ENSG00000172572	PDE3A	2.62E-08	3.24E-07	-1.6932123	0.30425522	0.72928529	1.46436156	0.10645905	0.82705724	0.93496737	0.93496737
ENSG00000164330	EBF1	2.65E-08	3.27E-07	-1.8298226	0.32890847	3.0096769	1.83484377	0.22109144	0.99594235	0.87172818	0.99594235
ENSG00000246596		2.65E-08	3.27E-07	-1.8045682	0.32438333	2.31742169	1.70863129	0.2365235	0.86992478	0.9472526	0.9472526
ENSG00000082293	COL19A1	2.66E-08	3.27E-07	-1.6803635	0.30209584	0.95458935	1.25095759	0.07643995	0.64840065	0.9502564	0.9502564
ENSG00000173212	MAB21L3	2.73E-08	3.35E-07	-2.185937	0.39329842	5.06786255	2.62181668	0.02001465	1.72017639	1.03187992	1.72017639
ENSG00000254681	PKD1P5	2.94E-08	3.59E-07	-1.9215647	0.34655776	1.56436893	1.87391372	0.38052937	0.80949285	0.97062129	0.97062129
ENSG00000259207	ITGB3	3.06E-08	3.72E-07	-1.7257527	0.31162223	1.56716169	1.62661099	0.12183192	0.95515166	0.97063772	0.97063772
ENSG00000078018	MAP2	3.14E-08	3.79E-07	-1.7082431	0.30872149	1.27945169	1.55696899	0.10706889	0.91073467	0.96515692	0.96515692
ENSG00000061455	PRDM6	3.19E-08	3.83E-07	-1.6082083	0.29076892	0.10571027	0.94574831	0.08391044	0.3764843	0.86723841	0.86723841
ENSG00000015568	RGPD5	3.42E-08	4.08E-07	-1.7577855	0.31854069	2.25954134	1.47947197	0.19043517	0.71522837	0.95108174	0.95108174
ENSG00000250251	PKD1P6	3.53E-08	4.19E-07	-1.8119749	0.32867167	1.75321787	1.82072802	0.18967685	1.02560513	0.97005149	1.02560513
ENSG00000280518		3.71E-08	4.38E-07	-2.5123103	0.45643105	1.45422324	3.5074835	0.72363534	1.62006929	0.96939065	1.62006929
ENSG00000107771	CCSER2	3.78E-08	4.46E-07	-1.6325355	0.29679015	4.14851938	1.01287152	0.07235142	0.44103193	0.91859803	0.91859803
ENSG00000161103	POM121L15P	3.80E-08	4.48E-07	-1.7966086	0.32666736	1.39976225	1.79562842	0.12792742	1.07257771	0.96836745	1.07257771
ENSG00000138346	DNA2	4.23E-08	4.94E-07	-2.0018443	0.36522307	2.39068495	2.23929883	0.20192895	1.29868482	0.94174608	1.29868482
ENSG00000278522	POTEB3	4.73E-08	5.44E-07	-1.9417024	0.35554594	1.30180957	2.11693674	0.32343401	1.09871126	0.96585118	1.09871126
ENSG00000244257	PKD1P1	4.80E-08	5.51E-07	-3.4183986	0.62622454	2.10076744	6.56515004	0.59940987	3.81235832	0.95982274	3.81235832
ENSG00000187912	CLEC17A	4.91E-08	5.63E-07	-1.8588906	0.34080628	2.01198279	1.94341114	0.13162111	1.17505426	0.96358991	1.17505426
ENSG00000222036	POTEM	4.94E-08	5.65E-07	-1.707544	0.31310218	1.49306446	1.59851386	0.13291727	0.92761066	0.96995368	0.96995368
ENSG00000185697	MYBL1	5.19E-08	5.91E-07	-1.7130553	0.31462689	1.64672869	1.48949083	0.14284401	0.80312455	0.9707944	0.9707944
ENSG00000089250	NOS1	5.37E-08	6.10E-07	-1.8383076	0.33802028	1.47607379	1.90798513	0.19538989	1.09000933	0.96972457	1.09000933
ENSG00000091157	WDR7	5.58E-08	6.31E-07	-1.6265865	0.29946178	2.58555069	0.68251911	0.08763793	0.09345793	0.92123233	0.92123233
ENSG00000204695	OR14J1	5.83E-08	6.57E-07	-1.9383155	0.35735539	3.15124304	2.12869709	0.16753006	1.2691273	0.86184585	1.2691273
ENSG00000182752	PAPPA	5.88E-08	6.62E-07	-1.6029366	0.29561915	0.60812243	1.29746266	0.05793556	0.76352103	0.92520958	0.92520958
ENSG00000283302	C13orf46	6.06E-08	6.78E-07	-1.6641045	0.30720379	1.11543986	1.42036686	0.10297171	0.8047464	0.9587377	0.9587377
ENSG00000283199	C13orf46	6.06E-08	6.78E-07	-1.6641045	0.30720379	1.11543986	1.42036686	0.10297171	0.8047464	0.9587377	0.9587377
ENSG00000165874	SHLD2P1	6.06E-08	6.78E-07	-1.881901	0.34739987	1.27695548	1.98079084	0.39264834	0.93535521	0.96507667	0.96507667
ENSG00000158406	H4C8	6.20E-08	6.93E-07	-2.5064479	0.46304572	4.14276735	3.56913655	0.0366954	2.37543213	0.91788086	2.37543213
ENSG00000070950	RAD18	6.23E-08	6.95E-07	-1.6865438	0.31162559	1.83009597	1.00152078	0.1236664	0.34340067	0.96882685	0.96882685
ENSG00000152217	SETBP1	6.29E-08	7.01E-07	-1.688054	0.31199948	5.04074722	1.39542337	0.0657328	0.80103976	1.02938351	1.02938351
ENSG00000143970	ASXL2	6.30E-08	7.01E-07	-1.825287	0.33737972	4.19044932	1.89410467	0.01973202	1.26080005	0.92352395	1.26080005
ENSG00000185477	GPRIN3	7.17E-08	7.90E-07	-2.0798042	0.38608064	3.70228716	2.47327722	0.04335905	1.63354641	0.86650602	1.63354641
ENSG00000111788		7.31E-08	8.04E-07	-1.9613232	0.36433699	1.62955967	2.20152816	0.19791561	1.29542558	0.9708117	1.29542558
ENSG00000196418	ZNF124	7.68E-08	8.40E-07	-1.57343	0.2927651	3.40291003	1.41996802	0.0644207	0.89983261	0.85722008	0.89983261
ENSG00000163380	LMOD3	7.81E-08	8.52E-07	-1.6750582	0.31184552	1.20400526	1.35024429	0.1315447	0.69774735	0.96249112	0.96249112
ENSG00000169946	ZFPM2	8.14E-08	8.83E-07	-1.8513371	0.34514175	2.42296632	1.57204407	0.40124803	0.5330933	0.93888379	0.93888379
ENSG00000136866	ZFP37	8.20E-08	8.89E-07	-1.6872107	0.31462434	1.49792615	1.42281033	0.14360606	0.75157776	0.9700143	0.9700143
ENSG00000163376	KBTBD8	8.25E-08	8.93E-07	-1.6327467	0.30452327	1.05470281	1.5339009	0.03924447	1.00401775	0.95578318	1.00401775
ENSG00000173068	BNC2	8.69E-08	9.37E-07	-1.7106531	0.31961667	1.65274117	1.68775047	0.17335576	0.97588595	0.97078165	0.97588595
ENSG00000196616	ADH1B	8.82E-08	9.50E-07	-1.6823169	0.31447682	3.07221478	1.63337397	0.22207693	0.89049939	0.86665199	0.89049939
ENSG00000167080	B4GALNT2	8.83E-08	9.50E-07	-1.6818155	0.31439892	2.49127368	1.63251055	0.03334239	1.07868279	0.93202934	1.07868279
ENSG00000204869	IGFL4	9.03E-08	9.70E-07	-1.762878	0.32980491	3.68688079	1.79551386	0.25487106	0.9688058	0.86576666	0.9688058
ENSG00000198846	TOX	9.35E-08	1.00E-06	-1.8022594	0.33756816	2.81421797	1.87958327	0.11328205	1.16868089	0.89276481	1.16868089
ENSG00000117016	RIMS3	9.44E-08	1.01E-06	-1.791414	0.33565065	1.9562853	1.85787517	0.13737857	1.13006175	0.96554594	1.13006175
ENSG00000215252	GOLGA8B	9.51E-08	1.02E-06	-1.7171932	0.32182782	5.0072207	0.90822191	0.13908449	0.2128401	1.02611339	1.02611339
ENSG00000072195	SPEG	9.53E-08	1.02E-06	-1.6812033	0.31509997	1.77410413	1.47976462	0.14721363	0.80983141	0.96977627	0.96977627
ENSG00000145244	CORIN	9.84E-08	1.05E-06	-1.6794218	0.31511034	2.04432084	1.54099356	0.15475302	0.86573789	0.9623104	0.9623104
ENSG00000118514	ALDH8A1	9.88E-08	1.05E-06	-1.853624	0.34783701	1.97428441	1.99322842	0.31634376	1.04480032	0.96494803	1.04480032
ENSG00000277606		1.01E-07	1.07E-06	-2.1306657	0.4001661	1.65352968	2.63658905	0.36579714	1.43569804	0.97077973	1.43569804
ENSG00000262418	PTPRC	1.02E-07	1.08E-06	-2.201378	0.41350549	2.30113004	2.81503586	0.15941239	1.76418904	0.94836519	1.76418904
ENSG00000283208		1.09E-07	1.14E-06	-1.7928809	0.33757403	1.81890369	1.873198	0.20505437	1.07695314	0.96904136	1.07695314
ENSG00000277481	PKD1L3	1.10E-07	1.15E-06	-1.7536164	0.33027468	1.71943662	1.79273322	0.17776027	1.04940511	0.97040635	1.04940511
ENSG00000257093	DENND11	1.20E-07	1.24E-06	-1.5496337	0.29271663	3.22495364	1.15619762	0.10497621	0.60537392	0.85895782	0.85895782
ENSG00000205746	PKD1P4	1.20E-07	1.24E-06	-2.2694584	0.4287499	2.33364147	3.01507189	0.13437042	1.93367743	0.94611784	1.93367743
ENSG00000165288	BRWD3	1.21E-07	1.25E-06	-1.5577817	0.29439473	2.68435664	0.9751555	0.06603872	0.4552368	0.90897916	0.90897916
ENSG00000153956	CACNA2D1	1.22E-07	1.26E-06	-1.5941818	0.30136256	0.81359876	1.4639765	0.08058162	0.91568888	0.94113657	0.94113657
ENSG00000183023	SLC8A1	1.24E-07	1.28E-06	-2.4044589	0.45478768	3.00951045	3.38980972	0.11700695	2.20985117	0.87174301	2.20985117
ENSG00000122367	LDB3	1.28E-07	1.31E-06	-1.8433537	0.34901469	2.21001383	1.96348843	0.41629132	0.92196469	0.95408531	0.95408531
ENSG00000137812	KNL1	1.29E-07	1.31E-06	-1.6941712	0.32081187	1.35894838	1.20589607	0.19042916	0.47953527	0.96742372	0.96742372
ENSG00000163749	CCDC158	1.30E-07	1.32E-06	-1.6925433	0.3206008	1.60869888	1.67022096	0.18553508	0.95782924	0.97079477	0.97079477
ENSG00000108576	SLC6A4	1.31E-07	1.34E-06	-1.8617067	0.35281136	2.13532282	1.90034813	0.44221362	0.81862397	0.95813978	0.95813978
ENSG00000281857	SAG	1.33E-07	1.34E-06	-1.5998952	0.30330658	1.02401918	1.04024918	0.08076718	0.48093062	0.95417525	0.95417525
ENSG00000130561	SAG	1.33E-07	1.34E-06	-1.5998952	0.30330658	1.02401918	1.04024918	0.08076718	0.48093062	0.95417525	0.95417525
ENSG00000135905	DOCK10	1.38E-07	1.39E-06	-1.7173258	0.32601257	4.01721672	1.73778017	0.22948782	0.96620942	0.90075929	0.96620942
ENSG00000100285	NEFH	1.41E-07	1.41E-06	-1.9576625	0.37186295	1.44958519	2.26006807	0.15929515	1.39637792	0.96931411	1.39637792
ENSG00000186399	GOLGA8R	1.50E-07	1.50E-06	-2.1290726	0.40536302	2.72119326	2.68159247	0.34796568	1.50062509	0.90432853	1.50062509
ENSG00000221843	C2orf16	1.54E-07	1.54E-06	-1.7412163	0.33183868	2.71604813	1.79592228	0.12195692	1.11685828	0.90497784	1.11685828
ENSG00000113805	CNTN3	1.59E-07	1.58E-06	-2.8016724	0.53450513	3.12174639	4.65630269	0.13670057	3.07737647	0.86341316	3.07737647
ENSG00000122591	FAM126A	1.64E-07	1.63E-06	-1.5336618	0.29289959	3.5776198	1.39727828	0.06349087	0.90164852	0.86120594	0.90164852
ENSG00000101890	GUCY2F	1.67E-07	1.65E-06	-1.7851492	0.34113732	1.41991644	1.89466946	0.18727834	1.12193673	0.96877772	1.12193673
ENSG00000276794		1.75E-07	1.72E-06	-1.9595007	0.37506065	1.41387964	2.28785562	0.16469005	1.41785298	0.96865872	1.41785298
ENSG00000155849	ELMO1	1.75E-07	1.72E-06	-1.6292302	0.31186497	2.95863713	1.58176091	0.19943891	0.89473342	0.87657038	0.89473342
ENSG00000274211	SOCS7	1.81E-07	1.77E-06	-2.3058926	0.44188021	1.97160344	3.17328392	0.49376365	1.70289017	0.96503915	1.70289017
ENSG00000179841	AKAP5	1.82E-07	1.78E-06	-1.7393416	0.33342709	2.29990547	1.80636466	0.09704925	1.15365399	0.94844771	1.15365399
ENSG00000138675	FGF5	1.95E-07	1.90E-06	-1.7968386	0.34525477	1.49483396	1.93390904	0.24330159	1.09770802	0.969976	1.09770802
ENSG00000138829	FBN2	1.95E-07	1.90E-06	-1.6127731	0.30989498	1.70050367	1.31106013	0.10983594	0.71931718	0.97055665	0.97055665
ENSG00000115808	STRN	1.97E-07	1.92E-06	-1.4618526	0.2810328	3.67208864	1.05123886	0.02344181	0.63141499	0.86507683	0.86507683
ENSG00000176887	SOX11	1.98E-07	1.92E-06	-1.8482389	0.3553378	2.25047763	2.04775817	0.27970847	1.14077221	0.95165022	1.14077221
ENSG00000120784	ZFP30	2.01E-07	1.95E-06	-1.5799531	0.30394282	1.85378534	1.19027406	0.07095705	0.65565218	0.96833189	0.96833189
ENSG00000010292	NCAPD2	2.07E-07	2.00E-06	-1.4977751	0.28842765	3.01681275	0.77109528	0.06479481	0.28446649	0.87109842	0.87109842
ENSG00000163046	ANKRD30BL	2.19E-07	2.11E-06	-1.9396789	0.37429664	5.14183384	2.26678663	0.1787406	1.39736159	1.03789017	1.39736159
ENSG00000188167	TMPPE	2.22E-07	2.13E-06	-1.5996817	0.30884615	2.943178	1.03046765	0.19494737	0.35693276	0.87814452	0.87814452
ENSG00000012124	CD22	2.23E-07	2.14E-06	-2.4416856	0.47145607	2.03271669	3.59495399	0.11109244	2.38945435	0.96278172	2.38945435
ENSG00000198945	L3MBTL3	2.29E-07	2.18E-06	-1.5330157	0.29628441	3.07534589	1.41895589	0.07015975	0.91741533	0.86642561	0.91741533
ENSG00000255185	PDXDC2P	2.43E-07	2.30E-06	-1.6101079	0.31183439	2.93548185	1.10885697	0.21501256	0.4101172	0.87894518	0.87894518
ENSG00000136011	STAB2	2.49E-07	2.35E-06	-1.5452605	0.29954865	0.26444189	1.03290991	0.11412482	0.4734372	0.89533085	0.89533085
ENSG00000166153	DEPDC4	2.53E-07	2.38E-06	-1.6080681	0.31190147	1.48291299	1.48934125	0.12460838	0.88883904	0.96982001	0.96982001
ENSG00000236032	OR5H14	2.76E-07	2.57E-06	-1.7154695	0.33382566	1.39492352	1.79358001	0.12360707	1.13008808	0.96826345	1.13008808
ENSG00000160551	TAOK1	2.83E-07	2.63E-06	-1.5799012	0.30771805	4.44921621	0.6105603	0.10647213	0.03046009	0.95879486	0.95879486
ENSG00000037280	FLT4	2.84E-07	2.63E-06	-1.5916644	0.31005037	1.80635195	1.46528577	0.11220913	0.8869488	0.96926721	0.96926721
ENSG00000091879	ANGPT2	2.85E-07	2.64E-06	-1.7129539	0.3337181	2.77558044	1.63300116	0.35537689	0.7366437	0.89751049	0.89751049
ENSG00000047365	ARAP2	3.02E-07	2.78E-06	-1.4557525	0.28419343	3.45377504	0.63732694	0.05073694	0.1865237	0.85787953	0.85787953
ENSG00000185823	NPAP1	3.02E-07	2.78E-06	-1.6715463	0.32633412	2.28450659	1.71051794	0.18841785	1.00963915	0.94947233	1.00963915
ENSG00000178636		3.08E-07	2.83E-06	-1.6596653	0.32424811	1.36762647	1.68796248	0.15726617	1.02552321	0.96763698	1.02552321
ENSG00000216937	CCDC7	3.25E-07	2.97E-06	-1.9738549	0.38639479	3.33854644	2.39406808	0.15510666	1.52452882	0.85707434	1.52452882
ENSG00000154678	PDE1C	3.45E-07	3.13E-06	-1.6134571	0.3165351	1.04238402	1.60446413	0.08635203	1.04083576	0.95514686	1.04083576
ENSG00000011405	PIK3C2A	3.49E-07	3.17E-06	-1.5160357	0.29756211	3.87028295	0.61342558	0.11509562	0.06310284	0.88101551	0.88101551
ENSG00000100629	CEP128	3.53E-07	3.19E-06	-1.512	0.29688963	2.42929621	1.21262139	0.05332194	0.73677362	0.93829189	0.93829189
ENSG00000065328	MCM10	3.54E-07	3.20E-06	-1.5598621	0.30632951	1.07855096	1.18290141	0.09869526	0.63264997	0.95697966	0.95697966
ENSG00000105851	PIK3CG	3.59E-07	3.24E-06	-1.7343717	0.34077332	4.07195607	1.8578478	0.13792226	1.16850037	0.90846423	1.16850037
ENSG00000159450	TCHH	3.66E-07	3.30E-06	-1.929734	0.37943731	1.98914591	2.30230073	0.1953444	1.42434815	0.96442975	1.42434815
ENSG00000116675	DNAJC6	3.69E-07	3.32E-06	-1.5600666	0.30684063	1.38136496	1.4134772	0.09123998	0.8745327	0.9679607	0.9679607
ENSG00000143921	ABCG8	3.81E-07	3.41E-06	-1.7854782	0.35159312	1.70653544	1.97499665	0.1403337	1.25036566	0.97051255	1.25036566
ENSG00000105866	SP4	3.86E-07	3.45E-06	-1.5923154	0.31371117	3.87733078	1.57185778	0.04621403	1.06095133	0.88186739	1.06095133
ENSG00000137478	FCHSD2	3.89E-07	3.47E-06	-1.5797943	0.31133956	4.67718911	1.14562674	0.10157262	0.57971686	0.988916	0.988916
ENSG00000101109	STK4	3.90E-07	3.47E-06	-1.5483594	0.30516323	5.02051818	0.79769954	0.02021864	0.32621817	1.02743306	1.02743306
ENSG00000280537		4.00E-07	3.55E-06	-1.9333639	0.38140561	1.1042084	2.3215367	0.25141456	1.38512567	0.95821443	1.38512567
ENSG00000196597	ZNF782	4.01E-07	3.56E-06	-1.5564466	0.30709757	1.96780847	1.07640196	0.09580843	0.52926568	0.96516691	0.96516691
ENSG00000138778	CENPE	4.02E-07	3.56E-06	-1.5044276	0.29684478	0.57710694	1.06687909	0.06876567	0.57750526	0.9225486	0.9225486
ENSG00000150637	CD226	4.04E-07	3.57E-06	-1.5837872	0.31256161	2.17488673	1.55873097	0.07843349	1.02063254	0.95606321	1.02063254
ENSG00000183856	IQGAP3	4.08E-07	3.60E-06	-1.6401287	0.32379609	1.71717487	1.67243052	0.14445641	1.03503756	0.97042614	1.03503756
ENSG00000109458	GAB1	4.18E-07	3.69E-06	-1.5189346	0.3001431	2.08381847	1.18488081	0.05286246	0.70493742	0.96060373	0.96060373
ENSG00000078177	N4BP2	4.32E-07	3.80E-06	-1.6792984	0.33226169	4.11824494	1.7586453	0.01852402	1.22345161	0.9147306	1.22345161
ENSG00000158258	CLSTN2	4.32E-07	3.80E-06	-1.9133068	0.37856731	1.86200447	2.28296991	0.18116119	1.43111239	0.96814715	1.43111239
ENSG00000174807	CD248	4.33E-07	3.80E-06	-1.8996888	0.37588076	1.41491919	2.25065319	0.20409914	1.38537228	0.96867945	1.38537228
ENSG00000244681	MTHFD2P1	4.37E-07	3.83E-06	-1.6705415	0.33066583	2.40411272	1.68730542	0.28948562	0.88561	0.94058818	0.94058818
ENSG00000233139		4.41E-07	3.86E-06	-2.1223088	0.42024394	1.74102841	2.81198191	0.13208215	1.85472373	0.97019238	1.85472373
ENSG00000113319	RASGRF2	4.45E-07	3.89E-06	-1.5584023	0.30866699	1.93552422	1.45558717	0.1056521	0.9039633	0.96619514	0.96619514
ENSG00000144644	GADL1	4.64E-07	4.04E-06	-1.8927019	0.37548608	2.44090473	2.24232115	0.14003189	1.44610332	0.93718186	1.44610332
ENSG00000169327	OR5AU1	4.80E-07	4.18E-06	-1.6066252	0.31915741	1.70773507	1.6187051	0.10688305	1.03905831	0.97050335	1.03905831
ENSG00000152601	MBNL1	4.85E-07	4.21E-06	-1.5971074	0.31737245	6.05502076	1.44587297	0.06634809	0.90969577	1.06681121	1.06681121
ENSG00000080947	CROCCP3	4.91E-07	4.26E-06	-1.8869234	0.37514753	3.32482902	2.23534616	0.06659878	1.51667753	0.85715054	1.51667753
ENSG00000173200	PARP15	5.00E-07	4.33E-06	-1.7105218	0.3403191	3.07449264	1.83876028	0.04656236	1.25637991	0.86648702	1.25637991
ENSG00000119778	ATAD2B	5.18E-07	4.47E-06	-1.4986259	0.29856994	2.65585032	1.09841645	0.09030441	0.59142705	0.91256566	0.91256566
ENSG00000124181	PLCG1	5.43E-07	4.66E-06	-1.4548424	0.29036813	3.43123206	1.00237564	0.0909973	0.51811975	0.8575313	0.8575313
ENSG00000133056	PIK3C2B	5.64E-07	4.82E-06	-1.4240616	0.28463578	3.84533594	0.88271368	0.03332542	0.47125484	0.87812177	0.87812177
ENSG00000081320	STK17B	5.67E-07	4.83E-06	-1.514053	0.30267317	3.80664908	1.45025793	0.07858671	0.95203758	0.87406508	0.95203758
ENSG00000170092	SPDYE5	5.73E-07	4.88E-06	-1.9337646	0.38674823	1.28671614	2.36721899	0.2494765	1.43323316	0.96538733	1.43323316
ENSG00000236564	YWHAQP5	5.96E-07	5.05E-06	-1.6341939	0.3273279	1.60712282	1.62728104	0.23457315	0.90276217	0.9707918	0.9707918
ENSG00000137727	ARHGAP20	6.16E-07	5.21E-06	-1.5173298	0.304308	3.27196145	1.21135028	0.1839646	0.60170623	0.85782321	0.85782321
ENSG00000196632	WNK3	6.34E-07	5.35E-06	-1.6316721	0.32761807	2.32222618	1.6946891	0.19381722	1.01368581	0.94691929	1.01368581
ENSG00000281950	SPDYE16	6.68E-07	5.61E-06	-1.7603714	0.35416776	2.3805459	1.97811723	0.29872791	1.1124136	0.942588	1.1124136
ENSG00000214031	CLDN7P1	6.75E-07	5.66E-06	-1.6421564	0.33051146	1.71097864	1.53756147	0.25844771	0.78256094	0.9704778	0.9704778
ENSG00000262655	SPON1	6.84E-07	5.72E-06	-1.9144271	0.38552705	1.8246015	2.34259998	0.17327418	1.49882577	0.9689337	1.49882577
ENSG00000276480	MYH11	6.86E-07	5.73E-06	-1.5333472	0.30881716	3.51130159	0.94255079	0.2137463	0.28901263	0.85914416	0.85914416
ENSG00000236320	SLFN14	6.86E-07	5.73E-06	-1.5733498	0.31687732	1.88395281	1.53063587	0.16200552	0.91487267	0.9676209	0.9676209
ENSG00000140090	SLC24A4	6.87E-07	5.73E-06	-1.913156	0.38532509	1.95215974	2.3399505	0.1796257	1.49072282	0.96567839	1.49072282
ENSG00000132932	ATP8A2	7.31E-07	6.05E-06	-1.5931676	0.32166376	2.35961091	1.62825678	0.07015511	1.0938551	0.94423389	1.0938551
ENSG00000162490	DRAXIN	7.39E-07	6.09E-06	-1.626462	0.32851779	2.1983634	1.69798097	0.18974099	1.02440331	0.95475532	1.02440331
ENSG00000070367	EXOC5	7.44E-07	6.13E-06	-1.396443	0.28213708	3.48589134	0.75061067	0.0369936	0.34831558	0.85852141	0.85852141
ENSG00000186951	PPARA	7.44E-07	6.13E-06	-1.4634466	0.29566995	3.06294878	0.71475818	0.11614493	0.19552537	0.86733819	0.86733819
ENSG00000129317	PUS7L	7.46E-07	6.14E-06	-1.4772818	0.29849633	3.37580391	0.63222464	0.1453152	0.07450698	0.85706048	0.85706048
ENSG00000143297	FCRL5	7.59E-07	6.23E-06	-2.0990553	0.42442252	3.57702058	2.83229859	0.05398977	1.97252305	0.86118469	1.97252305
ENSG00000161405	IKZF3	7.63E-07	6.26E-06	-1.9014807	0.38454765	3.5400021	2.32483897	0.03861832	1.62499678	0.85996219	1.62499678
ENSG00000165671	NSD1	7.94E-07	6.48E-06	-1.5640485	0.31681632	5.27989788	1.13105069	0.0819379	0.59412599	1.04725364	1.04725364
ENSG00000033178	UBA6	8.08E-07	6.58E-06	-1.6290235	0.33019334	4.10165876	0.80263749	0.3140349	-0.0122886	0.91252611	0.91252611
ENSG00000167483	NIBAN3	8.10E-07	6.59E-06	-1.7873725	0.36232883	2.67240896	2.06105094	0.11702445	1.35990013	0.910485	1.35990013
ENSG00000197409	H3C4	8.24E-07	6.69E-06	-2.4073234	0.48834223	2.07442761	3.74242455	0.31466626	2.36821278	0.96102387	2.36821278
ENSG00000258674		8.28E-07	6.73E-06	-1.7660187	0.35832361	1.75634928	2.01466122	0.232099	1.21235383	0.97001295	1.21235383
ENSG00000149150	SLC43A1	8.34E-07	6.76E-06	-1.6344118	0.33170483	1.47899979	1.31884384	0.26805009	0.55539195	0.96976593	0.96976593
ENSG00000169499	PLEKHA2	8.46E-07	6.85E-06	-1.3990777	0.28410842	3.65054517	0.92329577	0.04396338	0.5155796	0.86410955	0.86410955
ENSG00000092439	TRPM7	8.47E-07	6.86E-06	-1.4146491	0.28728886	3.24957671	0.90178917	0.07021941	0.45894782	0.85829807	0.85829807
ENSG00000275023	MLLT6	8.54E-07	6.90E-06	-1.7793058	0.36145837	3.67897616	2.04859716	0.24260798	1.22722874	0.86539551	1.22722874
ENSG00000224981		8.61E-07	6.95E-06	-1.6650983	0.33836333	1.89748481	1.7948436	0.20806551	1.0799441	0.96727252	1.0799441
ENSG00000284227	DCHS2	8.86E-07	7.14E-06	-1.5047463	0.3061271	0.88702903	1.46815587	0.08420046	0.97007982	0.9460772	0.97007982
ENSG00000197410	DCHS2	8.86E-07	7.14E-06	-1.5047463	0.3061271	0.88702903	1.46815587	0.08420046	0.97007982	0.9460772	0.97007982
ENSG00000170396	ZNF804A	8.89E-07	7.16E-06	-1.9535095	0.39747939	1.56753278	2.4749259	0.25181172	1.52557426	0.97063985	1.52557426
ENSG00000164692	COL1A2	9.34E-07	7.50E-06	-1.6725766	0.34099364	1.04511379	1.81936501	0.11143519	1.19667726	0.95528894	1.19667726
ENSG00000188822	CNR2	9.42E-07	7.55E-06	-1.701533	0.34701427	2.36412176	1.88380506	0.22978476	1.12492794	0.94389008	1.12492794
ENSG00000166501	PRKCB	9.51E-07	7.61E-06	-1.6198578	0.33047614	2.59057094	1.70816547	0.05121913	1.17744373	0.92062618	1.17744373
ENSG00000163833	FBXO40	9.72E-07	7.76E-06	-1.6567016	0.33828962	1.61003098	1.78897351	0.17862515	1.10882332	0.97079709	1.10882332
ENSG00000136237	RAPGEF5	9.79E-07	7.81E-06	-1.580409	0.32280305	1.86831309	1.39095068	0.20426956	0.7261968	0.9680008	0.9680008
ENSG00000160229	ZNF66	9.92E-07	7.90E-06	-1.7285542	0.35325363	3.14995042	1.94979867	0.10889421	1.29497219	0.8619093	1.29497219
ENSG00000178904	DPY19L3	9.95E-07	7.92E-06	-1.5491675	0.3166318	3.57620938	1.03499468	0.26672062	0.3206171	0.86115598	0.86115598
ENSG00000261609	GAN	1.01E-06	8.05E-06	-1.4336944	0.29322049	3.02623058	0.78260842	0.09696909	0.30044041	0.87028631	0.87028631
ENSG00000129167	TPH1	1.08E-06	8.53E-06	-1.5102259	0.30967315	0.8447484	1.0413981	0.13556407	0.48139607	0.94328236	0.94328236
ENSG00000005108	THSD7A	1.08E-06	8.54E-06	-1.5976545	0.32761452	1.32542714	1.49558647	0.24094032	0.78533516	0.96653648	0.96653648
ENSG00000170417	TMEM182	1.10E-06	8.65E-06	-1.6841324	0.34556202	4.03835511	1.86144838	0.06700472	1.2763928	0.90375269	1.2763928
ENSG00000181722	ZBTB20	1.10E-06	8.68E-06	-1.4162974	0.29065591	3.02914276	1.01005217	0.08036995	0.55802179	0.87003967	0.87003967
ENSG00000276975	HYDIN2	1.10E-06	8.69E-06	-1.5685093	0.32192101	2.99328431	1.61522226	0.08820113	1.07767169	0.87322041	1.07767169
ENSG00000277221	LRRC37A2	1.12E-06	8.78E-06	-2.589374	0.53172614	3.00553726	4.40530045	0.36458316	2.81615959	0.87209909	2.81615959
ENSG00000133067	LGR6	1.12E-06	8.81E-06	-2.2483053	0.46176029	3.61145991	3.3219507	0.03948547	2.35926844	0.86247773	2.35926844
ENSG00000171657	GPR82	1.15E-06	8.95E-06	-1.5767623	0.32411633	2.45215725	1.63585684	0.13158007	1.05024815	0.93607667	1.05024815
ENSG00000171681	ATF7IP	1.18E-06	9.21E-06	-1.3629586	0.28054097	3.20937512	1.00863664	0.02595947	0.63974622	0.85945191	0.85945191
ENSG00000128655	PDE11A	1.19E-06	9.27E-06	-1.5068292	0.31025152	1.41424112	1.20058826	0.11421415	0.66666856	0.96866594	0.96866594
ENSG00000183826	BTBD9	1.21E-06	9.38E-06	-1.7756055	0.36579004	4.92388911	2.08092801	0.00509377	1.50018268	1.01728354	1.50018268
ENSG00000175544	CABP4	1.22E-06	9.43E-06	-1.5710125	0.32374067	1.72720247	1.15295136	0.2087556	0.48535177	0.97033462	0.97033462
ENSG00000153317	ASAP1	1.22E-06	9.45E-06	-1.4387415	0.2965303	3.10718547	1.081017	0.12492751	0.57322351	0.86428745	0.86428745
ENSG00000136111	TBC1D4	1.24E-06	9.54E-06	-1.614936	0.33298082	3.62313493	1.72350753	0.06186275	1.18549481	0.86294768	1.18549481
ENSG00000004766	VPS50	1.28E-06	9.83E-06	-1.3627399	0.28141413	3.54552735	1.09781415	0.03079847	0.72573791	0.86013301	0.86013301
ENSG00000162804	SNED1	1.32E-06	1.01E-05	-1.5138146	0.31301222	3.12549783	1.52051954	0.09526551	1.00697179	0.86319887	1.00697179
ENSG00000184156	KCNQ3	1.33E-06	1.02E-05	-1.534876	0.31744827	2.20151723	1.47906972	0.17912545	0.86849288	0.95457532	0.95457532
ENSG00000150627	WDR17	1.36E-06	1.03E-05	-1.5042448	0.31134099	2.40707707	1.3293308	0.15017248	0.76318186	0.94032616	0.94032616
ENSG00000125551	PLGLB2	1.36E-06	1.04E-05	-1.7231918	0.35670895	1.58101601	1.97339949	0.39633096	1.03513337	0.97070829	1.03513337
ENSG00000276231	PIK3R6	1.38E-06	1.05E-05	-1.6754848	0.34702191	2.81431676	1.86709067	0.1325562	1.22221609	0.89275282	1.22221609
ENSG00000144426	NBEAL1	1.43E-06	1.08E-05	-1.4653092	0.30392956	4.80035919	1.41153721	0.03608307	0.9833216	1.00311517	1.00311517
ENSG00000286219	NOTCH2NLC	1.46E-06	1.10E-05	-1.4245554	0.29572087	3.98696217	1.215641	0.08734093	0.75563389	0.89648096	0.89648096
ENSG00000154229	PRKCA	1.47E-06	1.11E-05	-1.4579881	0.30274229	2.83151825	0.93434393	0.14041462	0.3977205	0.89068044	0.89068044
ENSG00000189233	NUGGC	1.49E-06	1.12E-05	-1.6247011	0.3375554	2.93838367	1.76346329	0.0645194	1.21734667	0.878642	1.21734667
ENSG00000154864	PIEZO2	1.49E-06	1.13E-05	-1.7081279	0.35494961	3.70906997	1.94969663	0.33203303	1.08534572	0.86683798	1.08534572
ENSG00000135622	SEMA4F	1.51E-06	1.14E-05	-1.4718133	0.3059803	2.60167238	1.24534706	0.13399197	0.71265184	0.91927742	0.91927742
ENSG00000163132	MSX1	1.53E-06	1.15E-05	-2.1469523	0.44656093	1.56916876	3.08432494	0.17649608	2.06694144	0.97064907	2.06694144
ENSG00000162510	MATN1	1.56E-06	1.17E-05	-1.472263	0.30651743	0.80225085	1.21166203	0.11663376	0.69548744	0.94033678	0.94033678
ENSG00000112419	PHACTR2	1.59E-06	1.19E-05	-1.3498629	0.28127744	3.08492524	0.9775319	0.02431562	0.61663989	0.86575061	0.86575061
ENSG00000133019	CHRM3	1.60E-06	1.19E-05	-1.5844897	0.33020203	2.32658254	1.51227101	0.28001055	0.77136281	0.94661501	0.94661501
ENSG00000149970	CNKSR2	1.65E-06	1.23E-05	-1.4897441	0.31090374	3.23526711	0.97373985	0.22877414	0.33127937	0.85866364	0.85866364
ENSG00000081014	AP4E1	1.66E-06	1.23E-05	-1.4491206	0.30243921	3.86913424	0.94949185	0.14815357	0.41039086	0.88087802	0.88087802
ENSG00000132874	SLC14A2	1.68E-06	1.25E-05	-1.7371509	0.36279498	1.53788046	2.03103772	0.15776564	1.32296155	0.97042895	1.32296155
ENSG00000163507	CIP2A	1.68E-06	1.25E-05	-1.525714	0.31865373	2.49120581	0.99330569	0.21029064	0.34862747	0.93203662	0.93203662
ENSG00000101076	HNF4A	1.69E-06	1.25E-05	-1.4959322	0.31244806	1.5459615	1.3725297	0.12777303	0.83436239	0.97049463	0.97049463
ENSG00000166546	BEAN1	1.71E-06	1.27E-05	-1.4914602	0.31170307	1.4970785	1.42382868	0.12303262	0.89387755	0.97000389	0.97000389
ENSG00000082438	COBLL1	1.74E-06	1.29E-05	-1.3561695	0.28365287	3.00288247	1.22730049	0.03282409	0.85889621	0.87233909	0.87233909
ENSG00000152818	UTRN	1.75E-06	1.29E-05	-1.4217599	0.29742688	3.84886965	0.70778437	0.11668647	0.21121893	0.87851944	0.87851944
ENSG00000076770	MBNL3	1.76E-06	1.30E-05	-1.3804459	0.28883033	3.06813884	1.14258398	0.07155747	0.72109953	0.86695086	0.86695086
ENSG00000162601	MYSM1	1.82E-06	1.34E-05	-1.5725344	0.32949498	5.08988794	0.66288741	0.18757941	0.00708665	1.03379867	1.03379867
ENSG00000142875	PRKACB	1.84E-06	1.35E-05	-1.5750851	0.33015486	3.74988651	1.67854245	0.01858406	1.20769105	0.86926826	1.20769105
ENSG00000234828	IQCM	1.87E-06	1.37E-05	-2.007925	0.42121751	2.24484627	2.73095967	0.51958814	1.47643405	0.95199917	1.47643405
ENSG00000101670	LIPG	1.92E-06	1.41E-05	-1.455768	0.30575045	1.56091177	1.20177749	0.08108759	0.73034677	0.97059994	0.97059994
ENSG00000132938	MTUS2	1.94E-06	1.41E-05	-1.4671664	0.30823194	0.71082239	1.40838102	0.13528053	0.87985716	0.93354739	0.93354739
ENSG00000138380	CARF	1.96E-06	1.43E-05	-1.3700047	0.28797225	2.8259462	1.16758252	0.04159157	0.78206533	0.8913486	0.8913486
ENSG00000165186	PTCHD1	2.01E-06	1.46E-05	-1.7308841	0.3641959	1.59341834	2.03815714	0.20186342	1.29032144	0.97075604	1.29032144
ENSG00000233232	NPIPB7	2.08E-06	1.51E-05	-1.4313432	0.30164883	2.4319285	1.29803402	0.08561727	0.83741106	0.93804294	0.93804294
ENSG00000127957	PMS2P3	2.10E-06	1.52E-05	-1.5070973	0.31773358	2.44920071	1.54958461	0.15919508	0.97654446	0.93636976	0.97654446
ENSG00000067208	EVI5	2.11E-06	1.52E-05	-1.3577219	0.28625995	3.03326442	1.18636483	0.05218425	0.79707742	0.86969426	0.86969426
ENSG00000204764	RANBP17	2.16E-06	1.55E-05	-1.4569042	0.30747775	2.88248263	1.12336615	0.17886929	0.5521599	0.88473456	0.88473456
ENSG00000160321	ZNF208	2.16E-06	1.55E-05	-1.7218861	0.36341688	1.44519851	2.00161028	0.51656816	0.9444659	0.96923989	0.96923989
ENSG00000260644	HERC2P5	2.18E-06	1.57E-05	-1.6371349	0.34569477	2.17304587	1.80388086	0.38826646	0.92684732	0.95616338	0.95616338
ENSG00000138741	TRPC3	2.21E-06	1.59E-05	-1.4842713	0.31359379	1.818104	1.50766076	0.09039553	1.01594146	0.96905621	1.01594146
ENSG00000172575	RASGRP1	2.26E-06	1.62E-05	-1.7604027	0.37231797	3.84298141	2.12396503	0.03538812	1.52409444	0.87785916	1.52409444
ENSG00000228681		2.27E-06	1.62E-05	-1.9418548	0.41072505	1.71933473	2.58466154	0.24947303	1.64834643	0.97040725	1.64834643
ENSG00000099365	STX1B	2.37E-06	1.69E-05	-1.4207413	0.30107254	0.61041972	0.91134621	0.09434853	0.44119001	0.92540408	0.92540408
ENSG00000198879	SFMBT2	2.50E-06	1.76E-05	-1.69566	0.36013586	3.32607838	1.98261942	0.10241599	1.35668471	0.85714197	1.35668471
ENSG00000159307	SCUBE1	2.52E-06	1.77E-05	-1.3852558	0.29431589	0.66516675	0.93658651	0.04456393	0.53596365	0.9299318	0.9299318
ENSG00000140262	TCF12	2.52E-06	1.77E-05	-1.3717152	0.29144508	3.91937613	1.26011786	0.0683628	0.84851521	0.88721487	0.88721487
ENSG00000004700	RECQL	2.56E-06	1.80E-05	-1.4567782	0.30971737	2.63670863	1.46552108	0.04945849	1.02969606	0.91495716	1.02969606
ENSG00000197056	ZMYM1	2.61E-06	1.83E-05	-1.4488774	0.30830542	3.51846791	1.45149315	0.06660223	1.00273536	0.8593373	1.00273536
ENSG00000180432	CYP8B1	2.66E-06	1.86E-05	-1.4868003	0.3166262	1.25407805	1.47158848	0.16352098	0.90466437	0.96431573	0.96431573
ENSG00000091039	OSBPL8	2.68E-06	1.88E-05	-1.3161395	0.28041	3.15059584	1.19988871	0.01417623	0.87040866	0.86187756	0.87040866
ENSG00000009413	REV3L	2.73E-06	1.90E-05	-1.4087338	0.30033679	4.08531392	0.55160589	0.10446809	0.07171769	0.9103065	0.9103065
ENSG00000130307	USHBP1	2.73E-06	1.90E-05	-1.4328768	0.30549816	0.91326708	1.15214391	0.10221018	0.67156073	0.94774252	0.94774252
ENSG00000273136	NBPF26	2.75E-06	1.91E-05	-1.9817901	0.42264469	3.43101674	2.72439666	0.313661	1.69591001	0.85752839	1.69591001
ENSG00000188152	NUTM2G	2.75E-06	1.91E-05	-1.8725861	0.39938003	1.99636451	2.43263791	0.25288702	1.54153757	0.96416998	1.54153757
ENSG00000123066	MED13L	2.88E-06	1.99E-05	-1.5493022	0.33111001	5.32103045	1.67016732	0.01725152	1.21612913	1.04973709	1.21612913
ENSG00000053524	MCF2L2	2.89E-06	1.99E-05	-1.4890918	0.31827084	3.17708837	1.54307697	0.12340019	1.01618351	0.86067192	1.01618351
ENSG00000206149	HERC2P9	2.93E-06	2.02E-05	-1.4131061	0.30222387	3.59754504	1.39090927	0.03761398	0.9899528	0.86193812	0.9899528
ENSG00000151789	ZNF385D	2.94E-06	2.02E-05	-1.4227031	0.30433516	0.59152262	1.33009499	0.1181803	0.84224485	0.92379349	0.92379349
ENSG00000131374	TBC1D5	3.04E-06	2.08E-05	-1.3495613	0.28911913	3.44596637	0.77053231	0.08263697	0.34790795	0.85774909	0.85774909
ENSG00000234719	NPIPB2	3.06E-06	2.09E-05	-1.5072578	0.32296557	2.95372425	1.58674917	0.07056531	1.10288571	0.87706558	1.10288571
ENSG00000116984	MTR	3.07E-06	2.09E-05	-1.5721189	0.33691616	4.30148064	1.72664292	0.01826283	1.2587528	0.93716853	1.2587528
ENSG00000108381	ASPA	3.11E-06	2.11E-05	-1.38679	0.29736996	0.99419876	0.91379357	0.04228568	0.51423111	0.9525394	0.9525394
ENSG00000182141	ZNF708	3.14E-06	2.13E-05	-1.3426397	0.28803671	2.90146978	1.14678442	0.05074931	0.76614925	0.88260856	0.88260856
ENSG00000143702	CEP170	3.17E-06	2.15E-05	-1.3718703	0.29442518	3.34652009	0.64961685	0.11817168	0.1775969	0.85704792	0.85704792
ENSG00000237223	SULT1C2P1	3.20E-06	2.17E-05	-1.4635552	0.31425442	1.03025215	1.32169906	0.15649509	0.77251893	0.95450809	0.95450809
ENSG00000091656	ZFHX4	3.23E-06	2.18E-05	-1.3993457	0.30055631	1.83387694	0.912922	0.04750701	0.50133786	0.96875158	0.96875158
ENSG00000178295	GEN1	3.25E-06	2.19E-05	-1.3902275	0.29868795	2.31629478	1.10179644	0.05633262	0.68957687	0.94733044	0.94733044
ENSG00000227671	ZNF731P	3.30E-06	2.22E-05	-1.4926532	0.32092315	3.12165647	1.56385112	0.04284561	1.11581064	0.86341835	1.11581064
ENSG00000283515		3.32E-06	2.23E-05	-2.0477181	0.44037241	1.74859128	2.94425187	0.58398449	1.59770392	0.97010667	1.59770392
ENSG00000148483	TMEM236	3.32E-06	2.23E-05	-1.4985823	0.32228257	2.0592384	1.57690298	0.19952035	0.96897274	0.96168444	0.96897274
ENSG00000111704	NANOG	3.38E-06	2.27E-05	-1.3816509	0.29738217	0.67896523	0.90477648	0.06386668	0.48623712	0.93104007	0.93104007
ENSG00000102001	CACNA1F	3.41E-06	2.28E-05	-1.4621435	0.31480235	3.01780728	1.50362804	0.2190339	0.89584694	0.87101163	0.89584694
ENSG00000198862	LTN1	3.42E-06	2.29E-05	-1.4064627	0.30285244	3.59165757	1.39154379	0.01949079	1.01235469	0.86171672	1.01235469
ENSG00000102302	FGD1	3.44E-06	2.30E-05	-1.5646022	0.33699329	2.10517811	1.54164057	0.31798567	0.77541119	0.9596147	0.9596147
ENSG00000185736	ADARB2	3.46E-06	2.32E-05	-1.4230607	0.30661093	1.00272426	1.06465101	0.10460104	0.58560613	0.9530144	0.9530144
ENSG00000250120	PCDHA10	3.48E-06	2.32E-05	-1.5412985	0.33213956	1.413288	1.67300253	0.1908541	1.0502086	0.96864688	1.0502086
ENSG00000058091	CDK14	3.48E-06	2.32E-05	-1.3950655	0.30063247	2.42277512	0.99650547	0.07787212	0.55831729	0.93890152	0.93890152
ENSG00000198315	ZKSCAN8	3.56E-06	2.37E-05	-1.2891654	0.27812104	3.31329696	1.10764773	0.01295702	0.79142759	0.85724526	0.85724526
ENSG00000119285	HEATR1	3.59E-06	2.38E-05	-1.3540806	0.29221085	2.38410837	0.97010504	0.01831034	0.61287823	0.94229543	0.94229543
ENSG00000197535	MYO5A	3.64E-06	2.41E-05	-1.4613987	0.31558094	4.9757331	0.84037395	0.09752118	0.34309248	1.02288127	1.02288127
ENSG00000140382	HMG20A	3.66E-06	2.42E-05	-1.3252384	0.28622488	3.2011401	0.70081521	0.06191502	0.31032997	0.85973768	0.85973768
ENSG00000164796	CSMD3	3.66E-06	2.42E-05	-1.6582378	0.35815018	2.11427623	1.94291361	0.16415215	1.27890278	0.95917931	1.27890278
ENSG00000158711	ELK4	3.65E-06	2.42E-05	-1.4376425	0.31049737	4.38009933	1.20968092	0.13614677	0.6934997	0.94845017	0.94845017
ENSG00000185271	KLHL33	3.69E-06	2.44E-05	-1.7734549	0.38320632	2.10918113	2.22373856	0.224469	1.42756071	0.95942418	1.42756071
ENSG00000127903	ZNF835	3.70E-06	2.44E-05	-1.5536489	0.33573652	1.21219371	1.70685905	0.27252581	0.99556305	0.96280435	0.99556305
ENSG00000066933	MYO9A	3.72E-06	2.46E-05	-1.3186051	0.28500984	3.03285328	0.59160777	0.04411581	0.22044048	0.86972852	0.86972852
ENSG00000055147	FAM114A2	3.73E-06	2.46E-05	-1.3407961	0.28983535	2.69286056	0.98512532	0.03714508	0.61626673	0.90790591	0.90790591
ENSG00000215158	GUSBP18	3.77E-06	2.49E-05	-1.4412555	0.31172534	2.60264859	1.47074364	0.158207	0.93498571	0.9191583	0.93498571
ENSG00000127083	OMD	3.83E-06	2.52E-05	-1.52145	0.32930305	1.55162098	1.58919273	0.24941867	0.91818061	0.97053697	0.97053697
ENSG00000177051	FBXO46	4.11E-06	2.68E-05	-1.2855671	0.27911905	3.33565975	1.08292885	0.01937165	0.76166493	0.85708712	0.85708712
ENSG00000255346	NOX5	4.13E-06	2.69E-05	-1.4706241	0.31936056	1.56817662	1.54033915	0.13023938	1.01716125	0.9706435	1.01716125
ENSG00000166928	MS4A14	4.18E-06	2.72E-05	-2.1430262	0.46565936	2.10248668	3.27378858	0.34952446	2.0899102	0.95974188	2.0899102
ENSG00000048991	R3HDM1	4.23E-06	2.75E-05	-1.3450189	0.292427	3.17084963	1.11054535	0.10108852	0.67770582	0.86093893	0.86093893
ENSG00000177463	NR2C2	4.25E-06	2.76E-05	-1.4073449	0.30604208	3.81229252	1.41349599	0.05555945	0.99813527	0.87462078	0.99813527
ENSG00000146414	SHPRH	4.26E-06	2.76E-05	-1.6405232	0.35676187	4.49130189	1.92079455	0.04822309	1.38366605	0.9650487	1.38366605
ENSG00000174749	FAM241A	4.27E-06	2.76E-05	-1.5429947	0.33559319	5.28607923	1.69950399	0.05228973	1.21471665	1.04763609	1.21471665
ENSG00000145375	SPATA5	4.28E-06	2.77E-05	-1.310399	0.28504075	3.02949613	1.06875467	0.04403267	0.71008179	0.87000989	0.87000989
ENSG00000081479	LRP2	4.32E-06	2.79E-05	-1.5637001	0.34026555	2.09646327	1.74669314	0.13451893	1.16801328	0.96002384	1.16801328
ENSG00000145012	LPP	4.33E-06	2.80E-05	-1.3119246	0.28552674	3.22142457	0.63001399	0.05809761	0.24893571	0.85906447	0.85906447
ENSG00000107560	RAB11FIP2	4.36E-06	2.81E-05	-1.4261965	0.31048985	3.8073264	1.45400823	0.05931306	1.02523133	0.87413109	1.02523133
ENSG00000176230	OR4K17	4.39E-06	2.83E-05	-1.4997663	0.32660138	2.46478378	1.60857265	0.12633313	1.07368707	0.9348039	1.07368707
ENSG00000095637	SORBS1	4.40E-06	2.83E-05	-1.5145871	0.32987458	2.75009633	1.64085519	0.16612935	1.05806457	0.90069146	1.05806457
ENSG00000151835	SACS	4.47E-06	2.87E-05	-1.4495891	0.31592852	3.24958765	1.50451338	0.11823628	1.00463557	0.85829781	1.00463557
ENSG00000288349		4.51E-06	2.90E-05	-2.3292533	0.50785505	1.85337812	3.8868926	0.17404467	2.72751879	0.96834087	2.72751879
ENSG00000139618	BRCA2	4.56E-06	2.93E-05	-1.4759551	0.32198999	3.54297631	1.38957055	0.30631887	0.68466685	0.86005362	0.86005362
ENSG00000137770	CTDSPL2	4.57E-06	2.93E-05	-1.312606	0.28636554	3.0689528	0.83081993	0.05566798	0.45528655	0.8668908	0.8668908
ENSG00000165891	E2F7	4.60E-06	2.94E-05	-1.3798198	0.30112452	2.08509024	1.18172329	0.05955861	0.77324774	0.96054614	0.96054614
ENSG00000078328	RBFOX1	4.69E-06	2.99E-05	-1.799132	0.39297268	2.97248101	2.32506465	0.22914344	1.50816623	0.87520125	1.50816623
ENSG00000105270	CLIP3	4.71E-06	3.01E-05	-1.3635902	0.29791222	0.55829439	0.98924609	0.07755349	0.56809333	0.92090306	0.92090306
ENSG00000271425	NBPF10	4.72E-06	3.01E-05	-1.5190277	0.33189013	5.17891301	0.90240953	0.19864358	0.27175992	1.04055584	1.04055584
ENSG00000091428	RAPGEF4	4.75E-06	3.02E-05	-1.4184149	0.3100031	1.35337052	1.14157284	0.11386352	0.65715222	0.96728307	0.96728307
ENSG00000175893	ZDHHC21	4.81E-06	3.05E-05	-1.5132527	0.33090589	4.13274394	1.64762143	0.03030078	1.20155972	0.91661054	1.20155972
ENSG00000049249	TNFRSF9	4.82E-06	3.06E-05	-1.3686854	0.29932444	1.01106288	0.94287822	0.0544718	0.54130741	0.95347332	0.95347332
ENSG00000112276	BVES	4.85E-06	3.07E-05	-1.4234647	0.31140917	0.71652006	1.09786557	0.15698808	0.56678325	0.93398821	0.93398821
ENSG00000174469	CNTNAP2	4.86E-06	3.08E-05	-1.5784788	0.34535535	2.08008582	1.79414115	0.13338544	1.2084056	0.9607718	1.2084056
ENSG00000140396	NCOA2	4.96E-06	3.14E-05	-1.2838006	0.28114071	2.95174238	0.90440407	0.01193442	0.58837973	0.87726669	0.87726669
ENSG00000110841	PPFIBP1	4.98E-06	3.15E-05	-1.3321422	0.29178244	2.76768991	1.22431039	0.05929922	0.84190821	0.89849194	0.89849194
ENSG00000140470	ADAMTS17	5.10E-06	3.22E-05	-1.459319	0.31999173	1.92719947	1.53848613	0.11985119	1.03208927	0.9664433	1.03208927
ENSG00000152270	PDE3B	5.13E-06	3.23E-05	-1.57328	0.34505232	2.60093858	1.78870304	0.09213036	1.24730702	0.91936691	1.24730702
ENSG00000140443	IGF1R	5.14E-06	3.24E-05	-1.3304073	0.29181115	3.36306812	0.83055647	0.10094552	0.40061513	0.85703414	0.85703414
ENSG00000113263	ITK	5.15E-06	3.24E-05	-1.4182396	0.31111911	2.77651998	1.45401852	0.0457666	1.04317829	0.89739386	1.04317829
ENSG00000253767	PCDHGA8	5.21E-06	3.27E-05	-1.644714	0.36098321	1.93797338	1.95692778	0.27330994	1.19266491	0.9661208	1.19266491
ENSG00000230373	GOLGA6L5P	5.21E-06	3.27E-05	-1.9013702	0.41732557	1.66701775	2.6154391	0.29560808	1.66369898	0.97073746	1.66369898
ENSG00000146966	DENND2A	5.24E-06	3.29E-05	-1.5147598	0.33255809	1.58541646	1.6606145	0.15560319	1.08858925	0.9707269	1.08858925
ENSG00000196862	RGPD4	5.28E-06	3.31E-05	-1.9711982	0.43290838	1.19903294	2.81352646	0.13105988	1.97729888	0.96229811	1.97729888
ENSG00000119121	TRPM6	5.40E-06	3.38E-05	-1.5917313	0.34993247	3.3528357	1.83734755	0.1408193	1.23677398	0.85703617	1.23677398
ENSG00000197558	SSPOP	5.43E-06	3.40E-05	-1.4328538	0.31508715	1.61213906	1.42548302	0.14609859	0.90573695	0.97080042	0.97080042
ENSG00000112182	BACH2	5.45E-06	3.41E-05	-1.4634564	0.32187444	1.59242747	1.40434073	0.19478271	0.81835393	0.97075276	0.97075276
ENSG00000286112		5.47E-06	3.42E-05	-2.1944801	0.48273951	1.57313099	3.49549205	0.61457608	2.00709506	0.97067035	2.00709506
ENSG00000170949	ZNF160	5.68E-06	3.53E-05	-1.3607383	0.29985585	3.56824185	0.83990226	0.15064873	0.34458633	0.8608785	0.8608785
ENSG00000069869	NEDD4	5.70E-06	3.54E-05	-1.9745931	0.43518291	6.97602229	2.83791731	0.26884574	1.86172615	1.01665533	1.86172615
ENSG00000055609	KMT2C	5.74E-06	3.56E-05	-1.3998176	0.30861188	6.54531532	0.51355228	0.02197939	0.12035391	1.04948517	1.04948517
ENSG00000241859	ANOS2P	5.74E-06	3.56E-05	-1.4688103	0.32384181	1.28731751	1.57119934	0.1228496	1.05697747	0.9654062	1.05697747
ENSG00000197619	ZNF615	5.75E-06	3.56E-05	-1.5122533	0.33344323	3.20062025	1.66568732	0.11094204	1.13988231	0.8597563	1.13988231
ENSG00000090975	PITPNM2	5.85E-06	3.62E-05	-1.4491049	0.319773	2.11469575	0.99059467	0.19120715	0.40915757	0.95915903	0.95915903
ENSG00000205918	PDPK2P	5.87E-06	3.63E-05	-1.5828187	0.34933789	2.62220042	1.82735449	0.23232883	1.14058702	0.91675651	1.14058702
ENSG00000155970	MICU3	6.04E-06	3.71E-05	-1.4173614	0.31322648	1.28039922	1.29182177	0.13855957	0.78587506	0.96518723	0.96518723
ENSG00000088538	DOCK3	6.14E-06	3.77E-05	-1.5103189	0.33403239	2.28420743	1.66892155	0.16879113	1.08645732	0.94949199	1.08645732
ENSG00000204961	PCDHA9	6.21E-06	3.80E-05	-1.6297884	0.36063959	1.55516123	1.94486633	0.14940753	1.31377776	0.97056193	1.31377776
ENSG00000148848	ADAM12	6.21E-06	3.80E-05	-1.3323706	0.29482017	0.71055379	1.04182606	0.04431141	0.67114736	0.93352655	0.93352655
ENSG00000136274	NACAD	6.35E-06	3.88E-05	-1.6756844	0.37119505	1.60521705	2.0592253	0.22697339	1.32311646	0.9707879	1.32311646
ENSG00000205176	REXO1L1P	6.37E-06	3.89E-05	-2.065301	0.45756791	2.02724958	3.12880335	0.26858124	2.08681322	0.96299905	2.08681322
ENSG00000183230	CTNNA3	6.38E-06	3.89E-05	-1.6310467	0.36137526	2.05344348	1.951523	0.22589163	1.24326927	0.96193029	1.24326927
ENSG00000277868	CCDC125	6.46E-06	3.93E-05	-1.9514657	0.43262252	3.12640642	2.79603084	0.44769009	1.65788513	0.86314765	1.65788513
ENSG00000215421	ZNF407	6.46E-06	3.93E-05	-1.3757751	0.30500143	4.23403833	1.0131141	0.11808131	0.54537066	0.92845973	0.92845973
ENSG00000183801	OLFML1	6.55E-06	3.97E-05	-1.4025446	0.31113555	1.31350291	1.40378127	0.1228633	0.92356545	0.96619668	0.96619668
ENSG00000186260	MRTFB	6.64E-06	4.02E-05	-1.4117144	0.31338012	4.79607189	1.22980864	0.10221546	0.7622356	1.00261441	1.00261441
ENSG00000064313	TAF2	6.76E-06	4.08E-05	-1.498973	0.33301476	5.49359086	0.61130107	0.18909751	-0.0030818	1.05851436	1.05851436
ENSG00000129204	USP6	6.80E-06	4.11E-05	-1.7389958	0.38645645	2.78826351	2.22832457	0.15189792	1.52827371	0.89594077	1.52827371
ENSG00000267508	ZNF285	6.92E-06	4.17E-05	-1.4236981	0.31664212	1.48945354	1.37047752	0.15804286	0.84291173	0.96990723	0.96990723
ENSG00000080200	CRYBG3	6.93E-06	4.18E-05	-1.5124415	0.3364088	2.20903482	1.6877651	0.16626755	1.10690486	0.95414215	1.10690486
ENSG00000183530	PRR14L	6.96E-06	4.19E-05	-1.3752141	0.30595717	4.32921057	0.82998047	0.11206636	0.36539387	0.94104377	0.94104377
ENSG00000170325	PRDM10	7.11E-06	4.27E-05	-1.3713274	0.30540073	4.13281191	0.97348644	0.13266385	0.49284718	0.91661924	0.91661924
ENSG00000182545	RNASE10	7.14E-06	4.27E-05	-1.5148454	0.33741195	1.75902823	1.69662817	0.19947248	1.08130428	0.96997921	1.08130428
ENSG00000102781	KATNAL1	7.27E-06	4.35E-05	-1.340351	0.29880822	2.03112816	0.93483676	0.04162631	0.56086133	0.96284518	0.96284518
ENSG00000203668	CHML	7.33E-06	4.38E-05	-1.3832621	0.30849951	1.59181201	0.59294505	0.09993376	0.13209816	0.97075068	0.97075068
ENSG00000126266	FFAR1	7.36E-06	4.40E-05	-1.7487765	0.39009438	1.51582076	2.26607221	0.29962814	1.41232518	0.97021846	1.41232518
ENSG00000071794	HLTF	7.46E-06	4.45E-05	-1.874281	0.41836219	2.59718979	2.6055173	0.11671082	1.85234204	0.91982336	1.85234204
ENSG00000029725	RABEP1	7.57E-06	4.51E-05	-1.2729868	0.2843466	3.00191205	1.00403647	0.0371689	0.66985834	0.87242723	0.87242723
ENSG00000154258	ABCA9	7.60E-06	4.52E-05	-1.4363284	0.32088441	2.39255938	1.2555981	0.21678923	0.66029865	0.94158734	0.94158734
ENSG00000059758	CDK17	7.61E-06	4.53E-05	-1.2753945	0.28495708	3.14085753	0.74416087	0.05113744	0.39034344	0.8623686	0.8623686
ENSG00000214189	ZNF788P	7.67E-06	4.56E-05	-1.372444	0.30674615	1.40246474	1.03013362	0.09012389	0.59241673	0.96842461	0.96842461
ENSG00000149534	MS4A2	7.78E-06	4.61E-05	-1.7637081	0.39445442	2.33381113	2.31390283	0.24573934	1.5046964	0.94610583	1.5046964
ENSG00000168939	SPRY3	7.81E-06	4.63E-05	-1.3720467	0.30692059	2.58883894	1.40074445	0.12103463	0.93871816	0.92083558	0.93871816
ENSG00000177602	HASPIN	7.85E-06	4.65E-05	-1.7448443	0.39040898	1.59358037	2.26616823	0.27284792	1.44186774	0.97075657	1.44186774
ENSG00000165841	CYP2C19	7.86E-06	4.65E-05	-1.4684776	0.32859396	1.91994146	1.60530214	0.13875429	1.07595308	0.966654	1.07595308
ENSG00000198482	ZNF808	7.92E-06	4.68E-05	-1.3311111	0.29797409	2.22672726	1.01876665	0.04577143	0.64688106	0.95309986	0.95309986
ENSG00000138079	SLC3A1	7.95E-06	4.70E-05	-1.5275014	0.34198653	1.83421307	1.73834204	0.1721456	1.14359574	0.96874482	1.14359574
ENSG00000188828	GLRA4	7.98E-06	4.71E-05	-1.3506566	0.30245631	0.88109265	1.1027034	0.08345491	0.68441451	0.94569305	0.94569305
ENSG00000197385	ZNF860	8.20E-06	4.82E-05	-1.3774106	0.30883569	2.24932263	1.32771882	0.12129715	0.86131034	0.95172205	0.95172205
ENSG00000167110	GOLGA2	8.21E-06	4.82E-05	-1.4897	0.33404056	6.43741002	0.64214174	0.2001261	0.02263761	1.05518376	1.05518376
ENSG00000100154	TTC28	8.32E-06	4.88E-05	-1.341381	0.30097727	1.62493478	0.97338275	0.04829575	0.5928667	0.97081153	0.97081153
ENSG00000138780	GSTCD	8.37E-06	4.90E-05	-1.2655127	0.28403462	3.14356492	1.12386408	0.04537175	0.7872292	0.86222946	0.86222946
ENSG00000142173	COL6A2	8.43E-06	4.93E-05	-1.9349768	0.43443335	2.32956554	2.80117577	0.12382519	1.99941364	0.94640554	1.99941364
ENSG00000271699	SNX29P2	8.48E-06	4.96E-05	-1.6319258	0.36650709	2.45194624	1.99338062	0.11181963	1.39936417	0.93609765	1.39936417
ENSG00000197594	ENPP1	8.60E-06	5.01E-05	-1.3979779	0.31417236	1.41989956	0.995896	0.14164564	0.49234598	0.9687774	0.9687774
ENSG00000172175	MALT1	8.80E-06	5.11E-05	-1.375572	0.30948363	4.58214498	0.75421299	0.09977723	0.30041818	0.97774907	0.97774907
ENSG00000004777	ARHGAP33	8.87E-06	5.15E-05	-1.5276124	0.34382952	2.50389241	1.75238516	0.26140999	1.06855085	0.93066174	1.06855085
ENSG00000158987	RAPGEF6	8.92E-06	5.17E-05	-1.4765997	0.33243227	4.22101534	1.63792318	0.02755148	1.21569967	0.92692401	1.21569967
ENSG00000072840	EVC	9.13E-06	5.28E-05	-1.3806371	0.31116932	1.2443551	1.09776272	0.12531795	0.62164261	0.96397847	0.96397847
ENSG00000135253	KCP	9.18E-06	5.30E-05	-1.4642549	0.33011103	2.84967627	1.16136805	0.33742358	0.42809779	0.88852597	0.88852597
ENSG00000135476	ESPL1	9.21E-06	5.31E-05	-1.3853794	0.31237732	2.03390531	1.30571838	0.13503634	0.82092105	0.96273407	0.96273407
ENSG00000264204	AGAP7P	9.31E-06	5.37E-05	-1.9068336	0.43018819	1.19478908	2.73996678	0.26097812	1.82096806	0.96213169	1.82096806
ENSG00000006715	VPS41	9.71E-06	5.57E-05	-1.2749476	0.28821979	3.44150765	0.72320895	0.07686551	0.34352329	0.85767925	0.85767925
ENSG00000174123	TLR10	9.93E-06	5.68E-05	-1.8494993	0.41856614	3.07456425	2.58980891	0.12627696	1.84469616	0.86648186	1.84469616
ENSG00000168411	RFWD3	9.94E-06	5.68E-05	-1.2895726	0.29186415	2.81138312	0.89231473	0.06521865	0.51991663	0.89310902	0.89310902
ENSG00000147262	GPR119	9.95E-06	5.69E-05	-1.4358778	0.32499194	1.38903981	1.51127471	0.22008819	0.91733554	0.96813412	0.96813412
ENSG00000153064	BANK1	1.00E-05	5.71E-05	-1.8385309	0.41622212	3.89565728	2.56045525	0.08095626	1.86800334	0.88414591	1.86800334
ENSG00000174607	UGT8	1.02E-05	5.81E-05	-1.4884447	0.33731926	3.15027514	1.68081791	0.05831686	1.22175633	0.86189332	1.22175633
ENSG00000033170	FUT8	1.02E-05	5.82E-05	-1.3592956	0.30806779	3.69895714	0.58845313	0.20134537	0.03886644	0.86634446	0.86634446
ENSG00000164256	PRDM9	1.03E-05	5.83E-05	-1.841818	0.41750214	1.91648421	2.57456436	0.25729876	1.70366667	0.96675251	1.70366667
ENSG00000285942		1.05E-05	5.94E-05	-1.5806451	0.35863106	2.66910274	1.89880566	0.24777305	1.19915965	0.91090112	1.19915965
ENSG00000203710	CR1	1.06E-05	6.00E-05	-2.1757705	0.49394943	3.22028245	3.6009853	0.14902568	2.59581725	0.85909965	2.59581725
ENSG00000011258	MBTD1	1.07E-05	6.07E-05	-1.2719198	0.2889555	3.62479431	0.70892225	0.0763062	0.33104533	0.86301571	0.86301571
ENSG00000144445	KANSL1L	1.08E-05	6.10E-05	-1.3345372	0.30328552	4.15610834	0.87077579	0.11526851	0.42507012	0.9195302	0.9195302
ENSG00000047621	C12orf4	1.08E-05	6.12E-05	-1.2374767	0.28127471	3.10384777	1.10433708	0.02555175	0.80079683	0.86449722	0.86449722
ENSG00000058335	RASGRF1	1.09E-05	6.15E-05	-1.4433421	0.32817093	2.01996878	1.58827377	0.17420422	1.03737754	0.96328377	1.03737754
ENSG00000134954	ETS1	1.10E-05	6.17E-05	-1.7338463	0.39428647	4.67856423	2.29252282	0.0189047	1.73004075	0.9890701	1.73004075
ENSG00000173597	SULT1B1	1.13E-05	6.31E-05	-1.432954	0.32629824	1.91543202	1.56902198	0.0769004	1.12089318	0.96678225	1.12089318
ENSG00000170929	OR1M1	1.14E-05	6.36E-05	-1.3832723	0.31512472	1.67230177	1.46308169	0.14383848	0.97332692	0.97071613	0.97332692
ENSG00000273540	AGBL1	1.16E-05	6.45E-05	-1.5744482	0.35897955	2.04793765	1.89784324	0.22443114	1.22531491	0.96216071	1.22531491
ENSG00000145949	MYLK4	1.16E-05	6.47E-05	-1.4779767	0.33704471	2.32188854	1.67284928	0.20190149	1.07608883	0.94694279	1.07608883
ENSG00000162733	DDR2	1.17E-05	6.51E-05	-1.3139504	0.29974952	1.14603926	0.9208428	0.05070031	0.55114427	0.96010967	0.96010967
ENSG00000079112	CDH17	1.20E-05	6.68E-05	-1.7732368	0.40509051	1.99989735	2.41437807	0.21522574	1.63088041	0.96404092	1.63088041
ENSG00000112486	CCR6	1.20E-05	6.68E-05	-1.849044	0.42242066	2.91394834	2.62533776	0.12308925	1.88435192	0.88124183	1.88435192
ENSG00000108510	MED13	1.21E-05	6.71E-05	-1.2525228	0.28621618	3.74067161	1.08548749	0.0529573	0.74694978	0.86863932	0.86863932
ENSG00000163872	YEATS2	1.21E-05	6.72E-05	-1.2741264	0.29116637	3.63903879	0.81108773	0.09013881	0.42004994	0.86361209	0.86361209
ENSG00000156140	ADAMTS3	1.21E-05	6.72E-05	-1.5096255	0.34500651	1.4098822	1.75093468	0.1479582	1.1911236	0.96857809	1.1911236
ENSG00000158486	DNAH3	1.21E-05	6.74E-05	-1.3808773	0.31562925	5.82324084	0.79754565	0.05355423	0.38788449	1.06719132	1.06719132
ENSG00000049768	FOXP3	1.24E-05	6.87E-05	-1.4830119	0.33934473	1.77879854	1.69289718	0.13768825	1.15780373	0.96970853	1.15780373
ENSG00000234444	ZNF736	1.24E-05	6.87E-05	-1.2950366	0.29634787	2.42627929	1.06704042	0.04942297	0.71071128	0.9385752	0.9385752
ENSG00000072133	RPS6KA6	1.26E-05	6.95E-05	-1.3290705	0.30432992	1.60511213	0.53665725	0.07115017	0.13213359	0.97078767	0.97078767
ENSG00000197128	ZNF772	1.26E-05	6.95E-05	-1.2821464	0.29358009	2.64281075	1.0203173	0.05543257	0.66361662	0.91419671	0.91419671
ENSG00000097096	SYDE2	1.27E-05	6.99E-05	-1.5261852	0.34959673	2.86842835	1.79578179	0.09360931	1.28134177	0.88634161	1.28134177
ENSG00000136378	ADAMTS7	1.27E-05	7.02E-05	-1.743257	0.39942463	1.62956321	2.34386454	0.26738175	1.52744367	0.9708117	1.52744367
ENSG00000171241	SHCBP1	1.28E-05	7.02E-05	-1.3299736	0.30474318	1.06597625	1.00213732	0.08841497	0.58790861	0.95635461	0.95635461
ENSG00000076555	ACACB	1.29E-05	7.07E-05	-1.2808512	0.29360582	3.23842882	0.83695902	0.1112206	0.42195282	0.85857864	0.85857864
ENSG00000101842	VSIG1	1.30E-05	7.16E-05	-1.3175047	0.302215	0.74632392	0.98677889	0.09125044	0.57585293	0.93625601	0.93625601
ENSG00000166439	RNF169	1.32E-05	7.22E-05	-1.3689312	0.31417219	4.27005521	0.67522136	0.17745476	0.14592228	0.93296708	0.93296708
ENSG00000184347	SLIT3	1.33E-05	7.26E-05	-1.7242751	0.39585518	1.89501783	2.29991977	0.11983286	1.64305705	0.96733739	1.64305705
ENSG00000162775	RBM15	1.34E-05	7.32E-05	-1.3362649	0.30691865	4.42813029	0.80925961	0.10410829	0.37275851	0.95563112	0.95563112
ENSG00000112200	ZNF451	1.34E-05	7.33E-05	-1.2180278	0.27978397	3.14977546	1.04717865	0.01872164	0.75874619	0.86191792	0.86191792
ENSG00000225614	ZNF469	1.36E-05	7.45E-05	-1.3572338	0.31203614	3.4343937	1.4280528	0.04651427	1.04885945	0.85757487	1.04885945
ENSG00000285292	ABCF2-H2BK1	1.39E-05	7.58E-05	-2.4500827	0.56382235	1.76819581	4.66033208	0.48010182	3.0962242	0.96985846	3.0962242
ENSG00000058056	USP13	1.40E-05	7.62E-05	-1.4543786	0.3348128	1.9121014	1.64307095	0.13419331	1.12692729	0.96687567	1.12692729
ENSG00000251229		1.41E-05	7.67E-05	-1.4461086	0.33302332	1.2743282	1.62528042	0.16739	1.08028599	0.96499161	1.08028599
ENSG00000100784	RPS6KA5	1.44E-05	7.80E-05	-1.2610077	0.29066507	3.75571714	1.09595297	0.08078033	0.72563595	0.86968925	0.86968925
ENSG00000109805	NCAPG	1.44E-05	7.83E-05	-1.3353297	0.30786219	1.27330421	1.32247265	0.10130688	0.89810603	0.9649583	0.9649583
ENSG00000204177	BMS1P1	1.45E-05	7.90E-05	-1.2349419	0.28484944	3.15621435	1.18814399	0.02518557	0.88763045	0.86160608	0.88763045
ENSG00000165121		1.46E-05	7.94E-05	-1.4026027	0.32360821	2.73108129	0.81779166	0.27504369	0.17526055	0.90308187	0.90308187
ENSG00000169208	OR10G3	1.50E-05	8.13E-05	-1.4000998	0.32345978	3.32978555	1.53087729	0.29068814	0.88635697	0.85711848	0.88635697
ENSG00000082512	TRAF5	1.51E-05	8.18E-05	-1.4956738	0.34566011	4.08086132	1.74793219	0.05157254	1.29258774	0.90969495	1.29258774
ENSG00000243406	MRPS31P5	1.53E-05	8.26E-05	-1.3598118	0.31444866	1.60543462	0.76499436	0.14158866	0.27793594	0.97078836	0.97078836
ENSG00000078589	P2RY10	1.54E-05	8.31E-05	-1.426114	0.32989737	2.67111591	1.59141226	0.11192386	1.11243924	0.91064778	1.11243924
ENSG00000173517	PEAK1	1.57E-05	8.44E-05	-1.2598251	0.29170565	2.8126494	0.84101416	0.06433189	0.48332833	0.89295518	0.89295518
ENSG00000079482	OPHN1	1.57E-05	8.44E-05	-1.5590481	0.36099705	5.21632587	1.90470609	0.02617049	1.43991679	1.04313465	1.43991679
ENSG00000175322	ZNF519	1.58E-05	8.46E-05	-1.3812422	0.31988543	2.52957145	0.96629881	0.22337865	0.38952723	0.9277966	0.9277966
ENSG00000198099	ADH4	1.58E-05	8.48E-05	-1.3153349	0.30466919	1.16038286	1.17018556	0.08353667	0.77124364	0.9607256	0.9607256
ENSG00000213839	TMX2P1	1.58E-05	8.49E-05	-1.4400634	0.3335801	1.5753414	1.62605821	0.17309988	1.07875152	0.97068158	1.07875152
ENSG00000116191	RALGPS2	1.60E-05	8.58E-05	-1.2318238	0.28550616	3.22459792	1.01482005	0.05806143	0.67993421	0.85896843	0.85896843
ENSG00000204084	INPP5B	1.61E-05	8.62E-05	-1.4544317	0.33722225	4.66409499	0.97701965	0.29188038	0.29167527	0.98745665	0.98745665
ENSG00000242338	BMS1P4	1.63E-05	8.68E-05	-1.3475086	0.31258845	2.01430268	1.42352484	0.13575318	0.9601166	0.96350164	0.96350164
ENSG00000231087	FDPSP7	1.63E-05	8.68E-05	-1.651381	0.38308292	1.22139666	2.14297351	0.26279398	1.3881719	0.96314947	1.3881719
ENSG00000164506	STXBP5	1.63E-05	8.68E-05	-1.3342943	0.3095234	3.96029543	0.88682819	0.18504721	0.37174629	0.89275606	0.89275606
ENSG00000178199	ZC3H12D	1.63E-05	8.68E-05	-1.4000855	0.32479031	1.97714323	1.54040845	0.06325043	1.12349794	0.96485006	1.12349794
ENSG00000185942	NKAIN3	1.64E-05	8.72E-05	-1.2585506	0.29203702	3.12715838	0.96163093	0.09635775	0.57462143	0.86310547	0.86310547
ENSG00000166225	FRS2	1.65E-05	8.81E-05	-1.2753887	0.29610716	2.47173591	0.60845305	0.05230478	0.25113135	0.93408902	0.93408902
ENSG00000002016	RAD52	1.68E-05	8.92E-05	-1.334691	0.31011761	3.17172384	0.6457846	0.22104459	0.09034406	0.8609009	0.8609009
ENSG00000139132	FGD4	1.68E-05	8.94E-05	-1.2969168	0.30138449	4.22576437	1.13953496	0.09438905	0.73854437	0.92747781	0.92747781
ENSG00000109452	INPP4B	1.71E-05	9.07E-05	-1.2255768	0.28505463	2.83453748	1.0729391	0.02381187	0.7762825	0.89031973	0.89031973
ENSG00000108379	WNT3	1.74E-05	9.22E-05	-1.4222962	0.33112397	0.7814818	1.04999752	0.29463646	0.38108649	0.93884821	0.93884821
ENSG00000185760	KCNQ5	1.80E-05	9.46E-05	-1.4286434	0.33312257	2.24863339	1.58793492	0.29665493	0.92277031	0.95176485	0.95176485
ENSG00000153253	SCN3A	1.80E-05	9.47E-05	-1.7444415	0.40679955	2.62799039	2.41040912	0.33014842	1.53156766	0.91603999	1.53156766
ENSG00000196914	ARHGEF12	1.82E-05	9.57E-05	-1.3271965	0.30968421	5.44437186	0.42692989	0.02263413	0.06999596	1.05628937	1.05628937
ENSG00000172869	DMXL1	1.85E-05	9.69E-05	-1.2305684	0.28733164	3.34673905	1.20179512	0.02324466	0.90554937	0.85704737	0.90554937
ENSG00000197993	KEL	1.85E-05	9.72E-05	-1.3041503	0.30457786	0.79121855	1.19062038	0.10408628	0.77716391	0.93955004	0.93955004
ENSG00000168418	KCNG4	1.87E-05	9.78E-05	-1.3706606	0.32021802	1.30099364	1.25057764	0.18774363	0.71999063	0.96582662	0.96582662
ENSG00000136051	WASHC4	1.91E-05	9.97E-05	-1.3064438	0.3055825	3.35142	0.79809221	0.1934944	0.28729859	0.8570381	0.8570381
ENSG00000237094		1.92E-05	0.00010047	-1.5834883	0.37053344	3.57898958	1.9965026	0.05170809	1.492861	0.8612547	1.492861
ENSG00000140505	CYP1A2	1.94E-05	0.00010096	-1.3467105	0.3152289	2.4411542	1.30303831	0.18074648	0.79297647	0.93715766	0.93715766
ENSG00000169071	ROR2	1.95E-05	0.0001013	-1.3064174	0.30587721	0.39869874	0.80629694	0.14654106	0.34261149	0.90601873	0.90601873
ENSG00000109685	NSD2	1.95E-05	0.0001013	-1.4182064	0.33204934	5.34787663	0.4724439	0.18910964	-0.0986449	1.05127896	1.05127896
ENSG00000170379	TCAF2	1.94E-05	0.0001013	-1.367041	0.32006215	2.78152786	1.48925373	0.0607815	1.09166604	0.89677313	1.09166604
ENSG00000138767	CNOT6L	1.96E-05	0.00010185	-1.385106	0.32443053	4.18884604	1.52987	0.00954946	1.17457117	0.92334644	1.17457117
ENSG00000184293	CLECL1	1.97E-05	0.00010252	-1.8107141	0.42428039	1.53959337	2.61600426	0.21442301	1.81073281	0.97044338	1.81073281
ENSG00000118260	CREB1	1.99E-05	0.00010296	-1.2479375	0.29249283	3.42296903	1.2430997	0.03590343	0.92655721	0.85742568	0.92655721
ENSG00000118762	PKD2	2.00E-05	0.00010356	-1.251002	0.29332887	3.03321882	0.72908295	0.09827246	0.3398237	0.86969805	0.86969805
ENSG00000171914	TLN2	2.00E-05	0.00010356	-1.3328254	0.31251451	1.72615886	1.29426406	0.12839023	0.84362381	0.9703446	0.9703446
ENSG00000165406	MARCHF8	2.01E-05	0.00010416	-1.8330953	0.4299619	3.20833806	2.68522969	0.33016301	1.74959335	0.85948696	1.74959335
ENSG00000157833	GAREM2	2.03E-05	0.00010493	-1.3757861	0.3228589	2.62412512	1.51371303	0.15803315	1.01464291	0.91651857	1.01464291
ENSG00000189423	USP32P3	2.07E-05	0.00010675	-1.3310165	0.31265586	2.40519931	1.41889555	0.04733006	1.05239892	0.9404924	1.05239892
ENSG00000013573	DDX11	2.07E-05	0.00010684	-1.2484364	0.29328169	3.94725187	1.10857043	0.0766972	0.74867312	0.89096199	0.89096199
ENSG00000112624	BICRAL	2.08E-05	0.00010699	-1.3110002	0.30800634	4.58620635	0.89823613	0.08898765	0.4913626	0.97827629	0.97827629
ENSG00000184445	KNTC1	2.11E-05	0.00010843	-1.2656375	0.29760229	3.21189381	0.79547681	0.13701218	0.36147834	0.85936793	0.85936793
ENSG00000162104	ADCY9	2.12E-05	0.00010895	-1.2191651	0.28675274	3.02345729	1.19279309	0.01698471	0.90807053	0.87052317	0.90807053
ENSG00000204120	GIGYF2	2.16E-05	0.00011051	-1.2918585	0.30409875	3.98518295	0.43719937	0.14412497	-0.0230964	0.89623061	0.89623061
ENSG00000279486	OR2AG1	2.18E-05	0.00011176	-1.3703608	0.32278514	1.31633132	1.51034551	0.16049258	1.01164769	0.96627842	1.01164769
ENSG00000173258	ZNF483	2.20E-05	0.00011252	-1.2163558	0.28662712	2.90975259	1.1216621	0.04254637	0.81147859	0.88169855	0.88169855
ENSG00000251192	ZNF674	2.21E-05	0.00011278	-1.2738649	0.30022472	2.42469186	1.04125965	0.07529402	0.66916436	0.93872339	0.93872339
ENSG00000172349	IL16	2.22E-05	0.00011356	-1.3661679	0.32211215	5.34220422	1.40683975	0.11629922	0.95277628	1.05095844	1.05095844
ENSG00000104219	ZDHHC2	2.25E-05	0.00011478	-1.264263	0.29827011	2.1456717	0.95475148	0.04324488	0.61794091	0.95761205	0.95761205
ENSG00000285222	GCNT2	2.26E-05	0.00011522	-1.3627791	0.3215931	2.17262993	1.45158996	0.20731294	0.90907812	0.95618597	0.95618597
ENSG00000074657	ZNF532	2.27E-05	0.00011551	-1.2129447	0.28627714	2.87393873	0.97997931	0.03628097	0.67522571	0.8857083	0.8857083
ENSG00000260230	FRRS1L	2.28E-05	0.00011621	-1.2851349	0.30342839	2.13970007	1.14212422	0.07785595	0.76361211	0.9579179	0.9579179
ENSG00000121988	ZRANB3	2.30E-05	0.00011696	-1.3438655	0.31742874	3.00931053	1.45870792	0.15635037	0.97721091	0.87176084	0.97721091
ENSG00000204131	NHSL2	2.30E-05	0.00011708	-1.3131119	0.31019324	2.44660742	1.20026474	0.14584799	0.74066344	0.93662527	0.93662527
ENSG00000181827	RFX7	2.40E-05	0.00012158	-1.2617816	0.29873196	4.63467814	1.11597564	0.01976427	0.80664123	0.98419454	0.98419454
ENSG00000114127	XRN1	2.41E-05	0.00012187	-1.2234574	0.28970462	3.44165079	1.16021201	0.0865172	0.80336155	0.85768144	0.85768144
ENSG00000150995	ITPR1	2.43E-05	0.00012253	-1.3336465	0.31590817	5.14085246	1.17329915	0.08490902	0.76362983	1.03781816	1.03781816
ENSG00000102221	JADE3	2.43E-05	0.00012254	-1.275587	0.30216648	3.19387944	0.78967745	0.16717261	0.32051436	0.86000395	0.86000395
ENSG00000164151	ICE1	2.43E-05	0.00012254	-1.2008729	0.28446892	3.20129883	0.89945607	0.05064688	0.58460021	0.85973201	0.85973201
ENSG00000147133	TAF1	2.43E-05	0.00012256	-1.3431288	0.31817976	4.78524137	0.56932415	0.13758215	0.09164511	1.0013494	1.0013494
ENSG00000058866	DGKG	2.43E-05	0.00012256	-1.2686081	0.30052121	0.9507089	0.92729622	0.06599521	0.56512726	0.95002604	0.95002604
ENSG00000118971	CCND2	2.44E-05	0.00012286	-1.7296464	0.40980484	4.39206602	2.42774942	0.04424507	1.84507999	0.95022924	1.84507999
ENSG00000229685	HLA-DPA1	2.49E-05	0.00012557	-1.4611662	0.34662025	3.13765952	1.73582759	0.12504068	1.22659731	0.86253557	1.22659731
ENSG00000124440	HIF3A	2.52E-05	0.00012698	-1.3370113	0.31737478	1.92995005	1.45482538	0.08816357	1.04501238	0.96636207	1.04501238
ENSG00000178852	EFCAB13	2.56E-05	0.00012859	-1.3129295	0.31191085	1.11710351	1.27147046	0.13567994	0.82335782	0.95881431	0.95881431
ENSG00000090659	CD209	2.59E-05	0.00013009	-1.2872684	0.30602487	1.56330661	1.20323088	0.08296137	0.81960239	0.97061485	0.97061485
ENSG00000233954	UQCRHL	2.61E-05	0.00013078	-1.3248581	0.3150824	2.08199825	1.22949486	0.15617946	0.7540558	0.96068587	0.96068587
ENSG00000164116	GUCY1A1	2.63E-05	0.00013142	-1.3105816	0.31177457	2.68433165	1.40251656	0.07931517	1.01422286	0.90898231	1.01422286
ENSG00000198521	ZNF43	2.65E-05	0.00013214	-1.3986265	0.33285076	3.0831257	1.59825403	0.12634906	1.12003428	0.86587537	1.12003428
ENSG00000172742	OR4D9	2.65E-05	0.0001323	-1.5049681	0.35820521	2.3199058	1.85090445	0.15690206	1.28659639	0.94708056	1.28659639
ENSG00000204262	COL5A2	2.66E-05	0.00013277	-1.3548321	0.32253761	2.78783678	1.50050964	0.07629722	1.094046	0.89599341	1.094046
ENSG00000175787	ZNF169	2.68E-05	0.00013372	-1.2714653	0.30281779	2.78968347	1.26050199	0.13584373	0.83282175	0.89576569	0.89576569
ENSG00000092470	WDR76	2.74E-05	0.00013615	-1.274812	0.30395045	3.29512125	0.94383939	0.18188837	0.4630019	0.85745273	0.85745273
ENSG00000228284	HLA-DQA1	2.78E-05	0.00013779	-2.1307559	0.5084137	2.22149391	3.72436418	0.14004567	2.76790482	0.95341151	2.76790482
ENSG00000064309	CDON	2.78E-05	0.00013784	-1.27338	0.30385251	3.90506736	0.81572699	0.15332291	0.36195389	0.88534848	0.88534848
ENSG00000189195	BTBD8	2.79E-05	0.00013833	-1.2406455	0.29611339	3.69417493	0.92621501	0.12032118	0.52331112	0.86611412	0.86611412
ENSG00000004939	SLC4A1	2.81E-05	0.00013905	-1.5549657	0.3712691	1.66114988	1.98546889	0.15470795	1.3960004	0.970758	1.3960004
ENSG00000123908	AGO2	2.85E-05	0.00014078	-1.254065	0.29964112	2.92905174	0.81841672	0.13045656	0.39702528	0.87962244	0.87962244
ENSG00000218226	TATDN2P2	2.86E-05	0.00014106	-1.6455337	0.39323921	1.51192434	2.22649538	0.17694958	1.56271749	0.97017655	1.56271749
ENSG00000104447	TRPS1	2.87E-05	0.00014152	-1.3199475	0.31549267	4.68685684	0.71601403	0.12977321	0.26064727	0.99000253	0.99000253
ENSG00000288475	CASP8AP2	2.91E-05	0.00014304	-1.2437917	0.29750734	2.63353062	1.00217189	0.08039208	0.63899052	0.9153524	0.9153524
ENSG00000188785	ZNF548	2.91E-05	0.00014319	-1.2321802	0.29475207	2.30786723	0.86086138	0.02947793	0.55173423	0.9479084	0.9479084
ENSG00000213988	ZNF90	2.99E-05	0.00014636	-1.3091307	0.31360897	1.97568092	1.3378825	0.14154379	0.88698307	0.96490028	0.96490028
ENSG00000139547	RDH16	3.02E-05	0.00014751	-1.3845825	0.33184972	2.46019139	1.58344215	0.26051513	0.97838255	0.93527071	0.97838255
ENSG00000137878	GCOM1	3.04E-05	0.00014847	-1.6652273	0.39927433	2.07580799	2.29182356	0.25272226	1.54075263	0.96096267	1.54075263
ENSG00000127152	BCL11B	3.04E-05	0.00014871	-1.4374968	0.34470716	3.78664464	1.7081185	0.03681142	1.29994764	0.87220412	1.29994764
ENSG00000030419	IKZF2	3.08E-05	0.00015014	-1.2230891	0.29346162	4.40985696	1.14838478	0.01595774	0.86206467	0.95288911	0.95288911
ENSG00000118200	CAMSAP2	3.09E-05	0.00015082	-1.2302431	0.29526087	3.75605645	0.82587821	0.11104924	0.43550181	0.86971429	0.86971429
ENSG00000172493	AFF1	3.10E-05	0.00015134	-1.2105516	0.29059458	4.27651889	1.14845137	0.01619607	0.86781231	0.93381255	0.93381255
ENSG00000274646	RPS9	3.15E-05	0.00015333	-2.1112924	0.50720612	3.29371045	3.69505728	0.24304393	2.65110916	0.85747187	2.65110916
ENSG00000198826	ARHGAP11A	3.16E-05	0.00015359	-1.9125124	0.45952555	2.40289983	3.03277118	0.41159649	1.96399544	0.94069472	1.96399544
ENSG00000167914	GSDMA	3.19E-05	0.00015483	-1.3215728	0.31769974	1.2822594	1.4233083	0.1702511	0.93882563	0.96524652	0.96524652
ENSG00000141194	OR4D1	3.20E-05	0.00015546	-1.4891136	0.35806677	1.73263888	1.84075635	0.16325513	1.27912778	0.97028091	1.27912778
ENSG00000282051		3.22E-05	0.00015623	-2.3658556	0.56907525	3.02061043	4.64880082	0.29221905	3.35105564	0.87076831	3.35105564
ENSG00000140682	TGFB1I1	3.24E-05	0.00015678	-1.3122785	0.3157453	2.76032136	1.01213126	0.22215839	0.47340027	0.89941142	0.89941142
ENSG00000141485	SLC13A5	3.28E-05	0.00015852	-1.3677718	0.32932971	1.61018811	1.55619284	0.12216423	1.09798891	0.97079735	1.09798891
ENSG00000019505	SYT13	3.35E-05	0.00016136	-1.352436	0.32600512	0.85694105	1.52414327	0.0923455	1.10329703	0.94410231	1.10329703
ENSG00000173198	CYSLTR1	3.42E-05	0.00016418	-1.4399346	0.34750304	4.23315715	1.73085959	0.01880691	1.3397247	0.92835415	1.3397247
ENSG00000043093	DCUN1D1	3.42E-05	0.00016427	-1.2103078	0.29210565	3.42232878	0.43245799	0.10249623	0.05328853	0.857418	0.857418
ENSG00000122188	LAX1	3.43E-05	0.00016443	-1.2646921	0.30525712	2.94606973	1.33550791	0.07487065	0.97342586	0.87784656	0.97342586
ENSG00000075429	CACNG5	3.43E-05	0.00016457	-1.24481	0.30048209	0.71632449	0.98618448	0.08178364	0.62084439	0.93397312	0.93397312
ENSG00000156011	PSD3	3.44E-05	0.00016475	-1.1780736	0.28439921	3.2571751	0.96601511	0.05180899	0.66166505	0.85812376	0.85812376
ENSG00000166111	SVOP	3.46E-05	0.00016548	-1.246021	0.30089162	0.61138151	0.9084889	0.093042	0.52996578	0.9254854	0.9254854
ENSG00000121207	LRAT	3.46E-05	0.00016555	-1.3528127	0.32669284	1.58033366	1.11751872	0.22998711	0.55182247	0.97070524	0.97070524
ENSG00000283050	GTF2IP12	3.48E-05	0.00016655	-1.200562	0.2900272	3.15083677	0.77171751	0.08443674	0.42101422	0.86186574	0.86186574
ENSG00000135424	ITGA7	3.57E-05	0.00017045	-1.3336447	0.32264383	4.8739754	0.93899212	0.1594605	0.45073251	1.01165374	1.01165374
ENSG00000240505	TNFRSF13B	3.59E-05	0.00017129	-1.933227	0.46784206	1.95009299	3.13325583	0.16042632	2.30193089	0.9657441	2.30193089
ENSG00000146285	SCML4	3.60E-05	0.00017151	-1.2681232	0.30691292	3.01826075	1.34837504	0.06954363	0.99015623	0.87097214	0.99015623
ENSG00000186566	GPATCH8	3.62E-05	0.00017232	-1.1606116	0.2809766	2.98006193	0.92608403	0.01369483	0.66708089	0.8744685	0.8744685
ENSG00000080839	RBL1	3.63E-05	0.00017257	-1.2183234	0.29498587	2.80448732	0.95454519	0.08498824	0.59810931	0.8939492	0.8939492
ENSG00000145675	PIK3R1	3.63E-05	0.00017257	-1.2710169	0.30774043	4.86479129	1.29875188	0.05482238	0.95297358	1.01059957	1.01059957
ENSG00000175305	CCNE2	3.66E-05	0.00017428	-1.2917869	0.31295733	1.23779002	1.21677383	0.13810471	0.77597511	0.96374609	0.96374609
ENSG00000269404	SPIB	3.67E-05	0.00017428	-1.7497418	0.42391637	2.64905533	2.57119542	0.09209202	1.92959023	0.91341656	1.92959023
ENSG00000143458	GABPB2	3.74E-05	0.00017751	-1.2218702	0.2963692	3.16861011	0.64118365	0.12710311	0.23555136	0.8610373	0.8610373
ENSG00000274320	GOLGA6L9	3.75E-05	0.00017774	-1.5176224	0.36813739	2.41292757	1.93798137	0.11494319	1.40971459	0.93980244	1.40971459
ENSG00000108821	COL1A1	3.76E-05	0.00017794	-1.2092314	0.29335736	2.72643644	0.89312059	0.06449131	0.56040366	0.90366725	0.90366725
ENSG00000204519	ZNF551	3.76E-05	0.00017813	-1.2256981	0.29737471	2.54202526	1.19840951	0.06848586	0.85918453	0.92637097	0.92637097
ENSG00000185483	ROR1	3.77E-05	0.00017833	-1.3838653	0.33578036	1.64411542	1.44292319	0.29762119	0.79871991	0.97079886	0.97079886
ENSG00000092964	DPYSL2	3.80E-05	0.00017967	-1.2332232	0.29937424	2.63122185	0.51116093	0.09264134	0.13234231	0.91563916	0.91563916
ENSG00000257966	OLA1P3	3.81E-05	0.00017988	-1.4795241	0.35919534	2.3248254	1.84428044	0.15973922	1.29175028	0.94673798	1.29175028
ENSG00000158481	CD1C	3.89E-05	0.00018344	-1.9439338	0.47254678	1.84632694	3.19010067	0.20605094	2.30607927	0.96849373	2.30607927
ENSG00000155961	RAB39B	3.94E-05	0.0001856	-1.5345833	0.37330222	1.50747827	1.99020311	0.17910017	1.38863848	0.970127	1.38863848
ENSG00000087237	CETP	3.97E-05	0.00018674	-1.3532317	0.32932675	1.87126532	1.54862736	0.18898738	1.03114383	0.96793096	1.03114383
ENSG00000036549	ZZZ3	3.99E-05	0.00018759	-1.1786904	0.28693259	3.43208306	0.44270655	0.06867314	0.11218784	0.85754285	0.85754285
ENSG00000107077	KDM4C	4.08E-05	0.00019091	-1.2363135	0.30131172	4.18928624	0.80507992	0.09797819	0.42451176	0.92339527	0.92339527
ENSG00000157741	UBN2	4.10E-05	0.00019176	-1.1861208	0.28917417	4.06947949	1.12408791	0.03262383	0.83795822	0.90812032	0.90812032
ENSG00000163781	TOPBP1	4.10E-05	0.00019176	-1.2064584	0.29413304	2.99879237	0.53941887	0.10057318	0.16582109	0.87271206	0.87271206
ENSG00000276340	ZNF623	4.12E-05	0.00019233	-1.7560966	0.42822748	2.48753188	2.61607194	0.46835002	1.59466118	0.93242938	1.59466118
ENSG00000139737	SLAIN1	4.15E-05	0.00019393	-1.2498547	0.30493222	2.09718634	1.10704092	0.086076	0.73705117	0.95999019	0.95999019
ENSG00000102384	CENPI	4.16E-05	0.00019441	-1.2853589	0.31364318	2.62995691	1.40295625	0.14319426	0.96349125	0.91579614	0.96349125
ENSG00000101752	MIB1	4.19E-05	0.00019526	-1.2304831	0.30034495	4.03064496	0.95652316	0.11216773	0.5671662	0.90266201	0.90266201
ENSG00000166984	TCP10L2	4.21E-05	0.00019596	-1.2701085	0.3101011	0.94694872	1.31919771	0.13202859	0.89701345	0.94980168	0.94980168
ENSG00000120451	SNX19	4.22E-05	0.00019644	-1.1894494	0.29045779	4.18943702	0.85368308	0.02570247	0.56827882	0.92341198	0.92341198
ENSG00000145864	GABRB2	4.35E-05	0.000202	-1.3344145	0.32641585	2.32439198	1.51787399	0.08243034	1.11622684	0.94676826	1.11622684
ENSG00000177932	ZNF354C	4.36E-05	0.00020228	-1.2450067	0.30457503	2.55629053	1.30859711	0.11890498	0.91159949	0.92471193	0.92471193
ENSG00000080618	CPB2	4.37E-05	0.00020257	-1.2431435	0.30415357	0.77861079	1.31739671	0.10209075	0.93826425	0.93863993	0.93863993
ENSG00000173611	SCAI	4.41E-05	0.00020425	-1.2478864	0.3054973	1.7919026	0.84628419	0.08043878	0.47838944	0.96950796	0.96950796
ENSG00000103064	SLC7A6	4.48E-05	0.0002069	-1.1813188	0.28945302	2.69234882	1.01423731	0.03458883	0.72645371	0.90797052	0.90797052
ENSG00000229386	OR8B9P	4.53E-05	0.00020859	-1.3817545	0.33875737	1.00895594	1.63318076	0.11882739	1.17218387	0.9533579	1.17218387
ENSG00000041515	MYO16	4.63E-05	0.00021253	-1.2903096	0.31673337	1.77533734	1.35686987	0.15884159	0.89848963	0.96975868	0.96975868
ENSG00000173208	ABCD2	4.66E-05	0.00021403	-1.3179406	0.32366715	3.54856525	1.48978069	0.15085222	1.02770256	0.86022872	1.02770256
ENSG00000214279	SCART1	4.67E-05	0.0002142	-1.3423194	0.32968003	3.43972148	1.5455934	0.07742066	1.14532968	0.85765222	1.14532968
ENSG00000116132	PRRX1	4.67E-05	0.00021424	-1.2374389	0.30392988	1.15592858	1.27852866	0.07866428	0.92489732	0.96053619	0.96053619
ENSG00000138075	ABCG5	4.69E-05	0.00021458	-1.292401	0.31748295	1.5276505	1.4332185	0.15506473	0.97888376	0.97033701	0.97888376
ENSG00000120137	PANK3	4.69E-05	0.00021459	-1.1908218	0.29253487	2.61609611	1.03372746	0.04522785	0.7312684	0.91750946	0.91750946
ENSG00000151692	RNF144A	4.74E-05	0.00021671	-1.222952	0.30061728	1.22332216	0.74954549	0.0534502	0.41892139	0.96322076	0.96322076
ENSG00000166025	AMOTL1	4.78E-05	0.0002182	-1.2287088	0.30217028	1.45200779	0.99499668	0.05784804	0.6614691	0.96935434	0.96935434
ENSG00000174799	CEP135	4.78E-05	0.0002182	-1.1424401	0.28095389	3.24772963	1.10448447	0.02967724	0.84069221	0.85834251	0.85834251
ENSG00000084112	SSH1	4.78E-05	0.00021836	-1.1862494	0.29175009	2.62116123	0.43554697	0.04069391	0.12941661	0.91688488	0.91688488
ENSG00000168781	PPIP5K1	4.87E-05	0.00022239	-1.2195572	0.30026181	3.6469161	1.2806761	0.02655891	0.98770906	0.86395117	0.98770906
ENSG00000134897	BIVM	4.88E-05	0.00022265	-1.4396909	0.35449006	4.48941239	1.78496994	0.01227032	1.40144075	0.96477095	1.40144075
ENSG00000173114	LRRN3	5.03E-05	0.00022923	-1.2928374	0.31889103	2.21175368	1.44334352	0.16357197	0.98045728	0.95398406	0.98045728
ENSG00000069188	SDK2	5.04E-05	0.00022954	-1.8570851	0.45811082	3.19509335	2.97857393	0.71406447	1.64692265	0.85995849	1.64692265
ENSG00000105366	SIGLEC8	5.05E-05	0.00022988	-1.2606257	0.31101139	1.64472434	1.241115	0.11739305	0.83687491	0.97079788	0.97079788
ENSG00000185960	SHOX	5.10E-05	0.00023194	-1.2724706	0.31411413	2.60527969	1.39993995	0.12320157	0.98680993	0.91883683	0.98680993
ENSG00000203730	TEDDM1	5.15E-05	0.00023372	-1.4158479	0.34968665	1.34413592	1.73458006	0.30697163	1.06868681	0.96704407	1.06868681
ENSG00000105143	SLC1A6	5.16E-05	0.0002343	-1.2274128	0.30320987	2.18147018	1.22505754	0.07858043	0.87538156	0.95570214	0.95570214
ENSG00000229676	ZNF492	5.26E-05	0.00023842	-1.3357774	0.33033945	1.83072564	1.44280142	0.25883229	0.86275208	0.96881441	0.96881441
ENSG00000282984	TBCE	5.27E-05	0.00023844	-1.3765458	0.34044	3.0946949	1.64308023	0.28925364	1.01461451	0.86509002	1.01461451
ENSG00000170160	CCDC144A	5.26E-05	0.00023844	-1.2428653	0.30737027	3.40647171	1.14052733	0.20560916	0.65496114	0.85725125	0.85725125
ENSG00000285053	TBCE	5.27E-05	0.00023844	-1.3765458	0.34044	3.0946949	1.64308023	0.28925364	1.01461451	0.86509002	1.01461451
ENSG00000175595	ERCC4	5.28E-05	0.00023893	-1.2862574	0.31815333	4.55657177	0.49508486	0.16440708	0.01830591	0.97433525	0.97433525
ENSG00000069493	CLEC2D	5.34E-05	0.00024152	-1.1927766	0.29523966	3.74519218	1.05722407	0.11168041	0.68781383	0.86894222	0.86894222
ENSG00000144228	SPOPL	5.39E-05	0.00024315	-1.1622219	0.28780825	3.16515501	0.77802872	0.07068621	0.45875599	0.86119169	0.86119169
ENSG00000165810	BTNL9	5.54E-05	0.00024931	-1.334201	0.33095249	1.70588604	1.55074693	0.10697438	1.12523304	0.97051747	1.12523304
ENSG00000268043	NBPF12	5.57E-05	0.00025028	-1.2437912	0.30860585	4.89960314	0.98223157	0.05685472	0.64224401	1.01456794	1.01456794
ENSG00000188549	CCDC9B	5.60E-05	0.00025145	-1.2210762	0.30306389	3.30991953	1.18662631	0.17600848	0.74186906	0.85727838	0.85727838
ENSG00000223417	TRIM49D1	5.60E-05	0.00025145	-1.4782974	0.36690924	2.6634095	1.90553299	0.11580398	1.39869793	0.91161693	1.39869793
ENSG00000273542	H4C12	5.62E-05	0.00025228	-1.892099	0.46972615	4.0265215	3.12279267	0.10611708	2.37611277	0.902078	2.37611277
ENSG00000101972	STAG2	5.66E-05	0.00025363	-1.2934116	0.32121906	6.554043	0.48471894	0.11181516	0.05677346	1.04897881	1.04897881
ENSG00000115419	GLS	5.66E-05	0.00025373	-1.2767688	0.31709822	3.60749856	1.42286051	0.01899341	1.11220849	0.86232181	1.11220849
ENSG00000198064	NPIPB13	5.73E-05	0.00025672	-1.4273097	0.35474091	4.68696288	1.78016905	0.01495491	1.40075764	0.99001449	1.40075764
ENSG00000178229	ZNF543	5.84E-05	0.00026118	-1.1472859	0.28544154	3.29087549	1.15206169	0.05869321	0.85792159	0.85751165	0.85792159
ENSG00000171444	MCC	5.98E-05	0.00026745	-1.1993469	0.29883428	2.20843427	1.02139175	0.05046973	0.70952584	0.95417697	0.95417697
ENSG00000241549	GUSBP2	6.02E-05	0.00026873	-1.2724986	0.31716068	2.37406213	1.39676913	0.18853629	0.91823586	0.94311131	0.94311131
ENSG00000198466	ZNF587	6.04E-05	0.00026959	-1.24456	0.31026052	4.53961778	0.60554886	0.11095059	0.20459985	0.97199227	0.97199227
ENSG00000114796	KLHL24	6.04E-05	0.00026963	-1.1416888	0.28462236	3.36616431	0.73076765	0.0543236	0.43621851	0.85703762	0.85703762
ENSG00000083290	ULK2	6.08E-05	0.00027107	-1.2204363	0.30437939	2.8266847	0.73164004	0.15101676	0.30433298	0.89125987	0.89125987
ENSG00000261794	GOLGA8H	6.08E-05	0.00027107	-1.5587785	0.38875795	2.09535415	2.13473317	0.41597952	1.28426387	0.96007535	1.28426387
ENSG00000196646	ZNF136	6.08E-05	0.00027107	-1.2148538	0.30297471	2.20853052	0.52205359	0.07850742	0.16627924	0.95417139	0.95417139
ENSG00000088179	PTPN4	6.09E-05	0.0002712	-1.1670175	0.29106981	2.83162739	0.82939045	0.06245103	0.51707183	0.89066739	0.89066739
ENSG00000204604	ZNF468	6.11E-05	0.00027227	-1.1856343	0.29578629	2.59438101	0.54805842	0.06409266	0.22075217	0.92016454	0.92016454
ENSG00000144791	LIMD1	6.15E-05	0.00027366	-1.2117536	0.30241776	4.05902464	0.4197722	0.12222401	0.01997702	0.90666164	0.90666164
ENSG00000197706	OR6C74	6.19E-05	0.00027522	-1.3365851	0.33369999	2.94399008	1.57215692	0.11560193	1.13714954	0.87806069	1.13714954
ENSG00000112414	ADGRG6	6.26E-05	0.00027781	-1.2465489	0.31142899	1.24335071	1.00409863	0.127172	0.59283873	0.96394316	0.96394316
ENSG00000166415	WDR72	6.29E-05	0.00027874	-1.2320414	0.30789212	3.73396607	1.25229624	0.19826211	0.78120014	0.8682104	0.8682104
ENSG00000164236	ANKRD33B	6.31E-05	0.00027945	-1.6856371	0.4213293	2.20600227	2.50502009	0.18956504	1.80751675	0.95431758	1.80751675
ENSG00000065534	MYLK	6.34E-05	0.00028051	-1.276401	0.31912117	4.83464617	1.00625408	0.13856874	0.56902603	1.00711237	1.00711237
ENSG00000278091	ZNF85	6.37E-05	0.00028133	-1.2589194	0.31482049	2.1427718	1.27702611	0.15724829	0.83438382	0.95776103	0.95776103
ENSG00000241489		6.37E-05	0.00028133	-1.2710681	0.31786363	4.73121844	1.21732423	0.14160097	0.78333818	0.99506848	0.99506848
ENSG00000182866	LCK	6.38E-05	0.00028186	-1.2403084	0.3102109	4.28782359	1.35757974	0.03310374	1.04949282	0.93531521	1.04949282
ENSG00000103657	HERC1	6.38E-05	0.00028192	-1.1492117	0.2874353	3.2405651	0.73620739	0.07094179	0.421791	0.85852257	0.85852257
ENSG00000151006	PRSS53	6.42E-05	0.00028349	-1.3097122	0.32769196	1.0929513	1.30925685	0.25036831	0.74874395	0.95767941	0.95767941
ENSG00000112902	SEMA5A	6.44E-05	0.00028439	-1.1995074	0.30017939	2.2865287	1.13651111	0.06437207	0.812653	0.94933917	0.94933917
ENSG00000185274	GALNT17	6.51E-05	0.00028678	-1.3830544	0.34632385	1.51208192	1.69119372	0.2086447	1.14068264	0.97017827	1.14068264
ENSG00000144036	EXOC6B	6.51E-05	0.00028685	-1.1674389	0.29234166	2.36308818	0.88259974	0.01749665	0.6159621	0.94396939	0.94396939
ENSG00000103489	XYLT1	6.53E-05	0.00028737	-1.2089657	0.30278557	1.05829642	0.84620194	0.07542339	0.50186861	0.95596647	0.95596647
ENSG00000172320	OR5A1	6.53E-05	0.00028737	-1.3630825	0.34138673	3.06037098	1.64318613	0.19812722	1.11300293	0.86753336	1.11300293
ENSG00000082684	SEMA5B	6.56E-05	0.00028872	-1.5457227	0.38724341	2.23486708	2.1140068	0.23386694	1.45315448	0.95260955	1.45315448
ENSG00000273802	H2BC8	6.58E-05	0.00028944	-1.6093325	0.40324562	3.20589643	2.29217012	0.13169072	1.69763839	0.85957054	1.69763839
ENSG00000265817	FSBP	6.65E-05	0.00029202	-1.3154844	0.32981203	2.161525	1.53295661	0.21493373	1.008796	0.95678241	1.008796
ENSG00000131126	TEX101	6.71E-05	0.00029458	-1.9975646	0.50110473	1.80716395	3.53791704	0.17340238	2.65153955	0.96925307	2.65153955
ENSG00000109756	RAPGEF2	6.84E-05	0.0002996	-1.1143193	0.27984468	3.16863632	1.02319095	0.0199856	0.77999814	0.86103614	0.86103614
ENSG00000182903	ZNF721	6.84E-05	0.00029971	-1.1763009	0.29542169	4.21714217	0.92647287	0.05535447	0.6187051	0.92647778	0.92647778
ENSG00000105810	CDK6	6.86E-05	0.00030019	-1.1739309	0.29486415	2.36786555	0.77430427	0.03452962	0.4858182	0.94360016	0.94360016
ENSG00000241057		6.91E-05	0.00030224	-1.459355	0.36672325	1.48588636	1.8934134	0.15802262	1.3549442	0.96986015	1.3549442
ENSG00000138593	SECISBP2L	6.96E-05	0.00030428	-1.1323563	0.28467911	3.57281769	0.44063038	0.05068783	0.14883107	0.86103687	0.86103687
ENSG00000188766	SPRED3	6.98E-05	0.00030481	-1.4158478	0.35600498	1.63736196	1.78389129	0.21299534	1.21282457	0.97080734	1.21282457
ENSG00000188647	PTAR1	6.99E-05	0.00030524	-1.1100272	0.27913648	3.33097457	1.06092668	0.01945668	0.82076523	0.85711155	0.85711155
ENSG00000105738	SIPA1L3	7.00E-05	0.00030565	-1.1320215	0.28469502	3.06346276	1.02103321	0.04452713	0.74554858	0.86729949	0.86729949
ENSG00000079387	SENP1	7.04E-05	0.0003069	-1.1317295	0.28470483	2.87030072	0.87493732	0.02576351	0.61582566	0.88612596	0.88612596
ENSG00000154175	ABI3BP	7.12E-05	0.00031011	-1.2723485	0.32030532	1.93881363	1.44331965	0.10888729	1.04531208	0.96609516	1.04531208
ENSG00000079335	CDC14A	7.18E-05	0.00031235	-1.2438108	0.31328108	4.46094682	1.0031079	0.14358226	0.57674328	0.96054938	0.96054938
ENSG00000152936	LMNTD1	7.40E-05	0.00032052	-1.3126134	0.33119999	3.27641961	1.54166438	0.05188635	1.18216479	0.85774247	1.18216479
ENSG00000101265	RASSF2	7.44E-05	0.00032243	-1.6963248	0.42818519	5.05686626	2.57632364	0.12878648	1.9338173	1.03088464	1.9338173
ENSG00000185864	NPIPB4	7.47E-05	0.00032345	-1.1413447	0.28815682	3.92481429	1.11756553	0.04620136	0.83795992	0.88793514	0.88793514
ENSG00000163539	CLASP2	7.50E-05	0.00032482	-1.124097	0.28387953	3.50534709	0.84534689	0.04762089	0.56720726	0.85898945	0.85898945
ENSG00000229052		7.67E-05	0.0003316	-1.233388	0.3119038	1.15911193	1.34795001	0.13377309	0.94234817	0.96067173	0.96067173
ENSG00000122224	LY9	7.81E-05	0.00033682	-1.2251848	0.31015281	3.09807296	1.07851705	0.21732286	0.58863197	0.86486826	0.86486826
ENSG00000258367		7.81E-05	0.00033686	-1.4026596	0.35508831	2.53633316	1.76959467	0.24841041	1.17007631	0.92702531	1.17007631
ENSG00000168016	TRANK1	7.84E-05	0.00033796	-1.4038687	0.35548203	5.98397483	1.77333574	0.16174702	1.25988704	1.06746862	1.25988704
ENSG00000228492	RAB11FIP1P1	7.86E-05	0.00033876	-1.4482691	0.36678353	1.92654561	1.88775621	0.15350648	1.35995781	0.9664625	1.35995781
ENSG00000259295	CSPG4P12	7.87E-05	0.00033913	-1.2339895	0.31254636	3.16636444	1.37068346	0.06816194	1.03079685	0.86113728	1.03079685
ENSG00000122008	POLK	7.93E-05	0.00034126	-1.140021	0.28886047	3.77215534	1.17060816	0.02182837	0.91687579	0.87096855	0.91687579
ENSG00000255837	TAS2R20	7.93E-05	0.00034141	-1.2760709	0.32334672	1.64130437	1.44086623	0.20541946	0.94444421	0.97080292	0.97080292
ENSG00000185219	ZNF445	8.06E-05	0.00034598	-1.1001012	0.27902785	3.56017238	0.85373796	0.01528024	0.6184359	0.86060583	0.86060583
ENSG00000172650	AGAP5	8.12E-05	0.00034825	-1.1746591	0.29807172	3.17881073	1.24568688	0.11797688	0.88154909	0.86060001	0.88154909
ENSG00000047188	YTHDC2	8.14E-05	0.00034884	-1.2123522	0.30768824	4.20172058	0.85678538	0.14030933	0.44615814	0.92475127	0.92475127
ENSG00000180263	FGD6	8.23E-05	0.00035193	-1.3458858	0.3417947	3.29012708	1.63738571	0.06061574	1.25364993	0.85752245	1.25364993
ENSG00000177076	ACER2	8.24E-05	0.00035222	-1.4234053	0.36151128	2.35050333	1.83167662	0.1176685	1.35259858	0.94490935	1.35259858
ENSG00000081386	ZNF510	8.27E-05	0.00035341	-1.1451744	0.2909256	3.73100046	1.18609538	0.0230297	0.92914447	0.8680286	0.92914447
ENSG00000198690	FAN1	8.37E-05	0.00035697	-1.1735292	0.29834543	4.58136072	0.95902436	0.02371568	0.68471993	0.97764677	0.97764677
ENSG00000127483	HP1BP3	8.38E-05	0.00035722	-1.1510847	0.29265684	4.39970813	1.04335446	0.01217026	0.79216953	0.95137001	0.95137001
ENSG00000214814	FER1L6	8.40E-05	0.00035794	-1.4760772	0.37534215	4.66141122	1.97350626	0.09930657	1.48561286	0.98715941	1.48561286
ENSG00000185634	SHC4	8.55E-05	0.00036386	-1.4089246	0.35863764	2.63573012	1.80096943	0.14551154	1.30147423	0.91507891	1.30147423
ENSG00000132953	XPO4	8.58E-05	0.00036526	-1.1495472	0.29269223	2.27363355	0.74988769	0.01359217	0.49290716	0.95018114	0.95018114
ENSG00000142583	SLC2A5	8.76E-05	0.000371	-1.197757	0.30533786	1.10677902	1.02901131	0.09051597	0.67796974	0.95833512	0.95833512
ENSG00000280873	DGKD	8.84E-05	0.00037435	-1.1855338	0.30240861	2.34757285	0.88108226	0.08370179	0.53995487	0.9451216	0.9451216
ENSG00000282956	MAGI1	8.89E-05	0.00037613	-1.3224323	0.3374383	3.25962853	1.59272817	0.19598985	1.084987	0.85807038	1.084987
ENSG00000186472	PCLO	8.95E-05	0.0003783	-1.1683722	0.2982427	3.26146648	0.87978695	0.14264168	0.48753294	0.8580313	0.8580313
ENSG00000105497	ZNF175	8.95E-05	0.0003783	-1.1770708	0.30046792	2.44508724	0.98141602	0.07888658	0.65071201	0.93677435	0.93677435
ENSG00000175414	ARL10	8.96E-05	0.00037868	-1.1730909	0.29947519	0.48661756	0.8051271	0.09454092	0.45754355	0.91441968	0.91441968
ENSG00000149294	NCAM1	8.96E-05	0.00037869	-1.5202582	0.38810956	1.81288906	2.10654708	0.11155485	1.58302178	0.96915153	1.58302178
ENSG00000001629	ANKIB1	9.26E-05	0.00039022	-1.1982777	0.30653637	3.64050486	0.44233514	0.19342643	-0.021974	0.86367471	0.86367471
ENSG00000109956	B3GAT1	9.30E-05	0.00039144	-1.5301757	0.39153515	2.0850375	2.14185216	0.15134692	1.57327555	0.96054853	1.57327555
ENSG00000261599	HERC2P8	9.31E-05	0.00039173	-1.4577923	0.37304301	2.20053918	1.94424812	0.29966877	1.26589345	0.95463125	1.26589345
ENSG00000198932	GPRASP1	9.37E-05	0.00039387	-1.3140753	0.33639598	3.09526029	1.5807594	0.08094178	1.19213362	0.86505266	1.19213362
ENSG00000137807	KIF23	9.40E-05	0.00039467	-1.1917923	0.30514533	3.57241055	1.02532569	0.18650612	0.58099499	0.86102267	0.86102267
ENSG00000284431		9.45E-05	0.00039677	-2.0072972	0.51414017	1.81896263	3.69171012	0.8120314	2.16179485	0.96904026	2.16179485
ENSG00000149256	TENM4	9.51E-05	0.00039907	-1.1997615	0.30742199	1.70665323	1.01109516	0.09270647	0.65662204	0.97051165	0.97051165
ENSG00000159267	HLCS	9.86E-05	0.00041202	-1.3378212	0.343556	5.00377738	1.01530066	0.30207859	0.38357444	1.02576708	1.02576708
ENSG00000075539	FRYL	9.89E-05	0.00041309	-1.2246872	0.31455881	5.28815864	0.46324337	0.06539248	0.11491697	1.04776401	1.04776401
ENSG00000161298	ZNF382	9.96E-05	0.00041583	-1.2030366	0.30913522	1.47777878	1.01514351	0.10535283	0.64656745	0.96974877	0.96974877
ENSG00000158859	ADAMTS4	9.97E-05	0.00041632	-1.1938307	0.30679713	1.632901	0.89709114	0.08808982	0.5480226	0.97081055	0.97081055
ENSG00000121892	PDS5A	1.00E-04	0.0004173	-1.1259101	0.2893894	3.53654888	0.34103604	0.08228746	0.01874355	0.85985757	0.85985757
ENSG00000248483	POU5F2	0.00010061	0.0004196	-1.1697053	0.30076381	3.04754712	1.26130135	0.08095193	0.93671035	0.86853128	0.93671035
ENSG00000237846		0.00010193	0.0004241	-1.5306656	0.39389658	2.461168	2.16265025	0.46722685	1.27826143	0.9351718	1.27826143
ENSG00000198939	ZFP2	0.00010199	0.00042428	-1.3810773	0.35541679	2.22799441	1.37870752	0.46808837	0.56442507	0.95302398	0.95302398
ENSG00000156017	CARNMT1	0.00010281	0.0004271	-1.1018272	0.28369286	2.88809749	0.92769354	0.02131815	0.68689145	0.88410028	0.88410028
ENSG00000262152	GREP1	0.00010312	0.00042817	-1.2604362	0.32459224	1.96664649	1.46814146	0.15245167	1.0328497	0.96520573	1.0328497
ENSG00000284792	PTEN	0.00010342	0.00042933	-2.1545615	0.5549533	3.15699122	4.29112725	0.67009962	2.79459845	0.86156921	2.79459845
ENSG00000196584	XRCC2	0.00010357	0.00042973	-1.2641331	0.32563401	3.35459643	1.4774125	0.10395543	1.08896651	0.85703433	1.08896651
ENSG00000146463	ZMYM4	0.00010367	0.00042979	-1.2120259	0.31222912	3.23161758	0.50300106	0.23796426	-0.0112274	0.85876478	0.85876478
ENSG00000081138	CDH7	0.00010402	0.00043102	-1.3312967	0.34302734	1.39939759	1.63927391	0.13907376	1.18468852	0.96835969	1.18468852
ENSG00000049246	PER3	0.00010461	0.00043316	-1.1458728	0.29535581	3.48671452	0.94305009	0.12285431	0.58177379	0.85854003	0.85854003
ENSG00000276240	OR4E1	0.00010557	0.00043666	-1.229328	0.31704747	1.21704123	1.25879665	0.16785278	0.81951741	0.96298705	0.96298705
ENSG00000163960	UBXN7	0.00010635	0.00043954	-1.1063028	0.28545068	3.43661515	0.79595201	0.05906699	0.51321278	0.85760653	0.85760653
ENSG00000162929	SANBR	0.00010704	0.00044216	-1.2460826	0.32164801	5.10051456	1.07089754	0.1292094	0.65897739	1.03468681	1.03468681
ENSG00000152969	JAKMIP1	0.00010714	0.00044239	-1.2657355	0.32674129	2.6404193	1.4861744	0.24025359	0.96079497	0.91449497	0.96079497
ENSG00000013293	SLC7A14	0.00010818	0.00044642	-1.947691	0.50308727	2.51340723	3.52241594	0.73845553	2.1088835	0.92961246	2.1088835
ENSG00000179331	RAB39A	0.00010848	0.00044755	-1.4105953	0.36441932	1.61441207	1.84810094	0.1907041	1.30331209	0.97080353	1.30331209
ENSG00000186340	THBS2	0.00010924	0.00045036	-1.3737705	0.35506341	2.79540057	1.75410513	0.19088085	1.22740693	0.89506221	1.22740693
ENSG00000251429	AIDAP2	0.00011107	0.00045647	-1.2346912	0.31945019	0.96089467	0.96997619	0.19741657	0.49359022	0.95062817	0.95062817
ENSG00000133392	MYH11	0.00011113	0.0004566	-1.1757064	0.30419952	3.649315	0.61317416	0.17698942	0.17864095	0.86405571	0.86405571
ENSG00000013725	CD6	0.00011157	0.00045806	-1.3413877	0.34715399	3.95641785	1.67591492	0.03237275	1.32343106	0.89222044	1.32343106
ENSG00000260735		0.00011242	0.00046119	-1.2646268	0.32744511	3.45282187	1.49073146	0.11249555	1.09373282	0.85786306	1.09373282
ENSG00000123700	KCNJ2	0.00011264	0.00046199	-1.2995682	0.33653468	4.9536754	0.72052999	0.25358818	0.15178076	1.02053724	1.02053724
ENSG00000135164	DMTF1	0.00011446	0.00046851	-1.089836	0.28250949	3.62634575	1.10913865	0.03383362	0.864047	0.8630796	0.864047
ENSG00000180626	ZNF594	0.00011613	0.00047439	-1.2360676	0.32071068	3.4801608	1.42884018	0.07424491	1.08287767	0.85839474	1.08287767
ENSG00000152049	KCNE4	0.00011639	0.00047522	-1.3709682	0.35576285	3.73826696	1.75813693	0.20664875	1.21723228	0.86848268	1.21723228
ENSG00000170802	FOXN2	0.00011674	0.00047643	-1.3782177	0.357711	3.80326487	1.7773092	0.02501083	1.41450725	0.87373817	1.41450725
ENSG00000134250	NOTCH2	0.00011852	0.0004833	-1.086874	0.28236667	3.29825548	0.95623067	0.03956126	0.70402562	0.8574118	0.8574118
ENSG00000181036	FCRL6	0.00011976	0.00048697	-1.5190787	0.39491203	1.81675417	2.16477069	0.11823848	1.636261	0.96908114	1.636261
ENSG00000112038	OPRM1	0.00011982	0.00048711	-1.209653	0.31448192	2.33731894	0.78162994	0.16675557	0.34452868	0.9458568	0.9458568
ENSG00000163935	SFMBT1	0.00012025	0.00048875	-1.1129629	0.28941142	3.22363665	0.44849582	0.08329115	0.13267491	0.85899726	0.85899726
ENSG00000184261	KCNK12	0.00012062	0.00048998	-1.2350595	0.32122272	1.38558561	1.43200031	0.1406634	1.02015702	0.96805673	1.02015702
ENSG00000149503	INCENP	0.00012191	0.00049452	-1.1098203	0.28884683	2.82445551	1.04118233	0.04708765	0.77313856	0.89152788	0.89152788
ENSG00000196739	COL27A1	0.00012192	0.00049452	-1.3494368	0.35121145	2.69730982	1.71138241	0.08725869	1.30042302	0.90734411	1.30042302
ENSG00000120162	MOB3B	0.00012329	0.00049943	-1.1874028	0.30925975	3.31773637	1.32657287	0.05903395	1.01693394	0.85720545	1.01693394
ENSG00000155545	MIER3	0.00012376	0.00050066	-1.1448718	0.29825507	2.49986709	0.56754021	0.06965496	0.25343375	0.93110104	0.93110104
ENSG00000274750	H3C6	0.00012424	0.00050229	-1.2886171	0.33578674	3.1254753	1.56359605	0.0763516	1.19211665	0.86320014	1.19211665
ENSG00000225345	SNX18P3	0.00012526	0.00050589	-1.1599523	0.30241704	3.07388923	1.07688042	0.16235015	0.67211862	0.86653058	0.86653058
ENSG00000273814	OCLN	0.00012578	0.00050788	-1.287795	0.33583737	2.05747891	1.56356827	0.25870604	1.0101448	0.96175945	1.0101448
ENSG00000139496	NUP58	0.00012615	0.00050924	-1.1477673	0.29937671	4.50405496	0.8950476	0.04138416	0.61357098	0.966913	0.966913
ENSG00000214776		0.00012732	0.00051345	-1.5395373	0.40180155	2.42002397	2.23740669	0.10377638	1.71247407	0.93915562	1.71247407
ENSG00000149639	SOGA1	0.00013042	0.0005236	-1.118876	0.29246599	3.76030851	1.02824449	0.09225096	0.71089964	0.87003301	0.87003301
ENSG00000181785	OR5AS1	0.00013137	0.00052717	-1.3979951	0.3655967	4.44961629	1.85085861	0.02630576	1.47737987	0.9588548	1.47737987
ENSG00000198416	ZNF658B	0.00013142	0.00052721	-1.1658036	0.30488195	3.4691519	1.01377029	0.18755524	0.58007568	0.85816602	0.85816602
ENSG00000131023	LATS1	0.0001315	0.0005274	-1.1900012	0.31122235	4.1611381	1.34121837	0.01796178	1.0717059	0.9201388	1.0717059
ENSG00000180376	CCDC66	0.00013264	0.0005313	-1.2153999	0.31804151	4.14532652	0.45879102	0.21974101	-0.039565	0.91820104	0.91820104
ENSG00000259030	FPGT-TNNI3K	0.00013371	0.00053507	-1.4321261	0.37494888	2.19328196	1.94587085	0.3424214	1.23917854	0.95504319	1.23917854
ENSG00000215859	PDZK1P1	0.0001338	0.00053531	-1.3662745	0.35772403	1.16113961	1.77116224	0.19029974	1.24932319	0.96075761	1.24932319
ENSG00000158014	SLC30A2	0.00013392	0.00053537	-1.2375448	0.32403737	1.97482692	1.32001038	0.21632297	0.8293847	0.9649295	0.9649295
ENSG00000072858	SIDT1	0.00013473	0.00053823	-1.1423018	0.29921641	3.22557513	0.88032725	0.14827834	0.49413039	0.85893936	0.85893936
ENSG00000225830	ERCC6	0.00013659	0.00054442	-1.2873362	0.33750518	4.38746598	1.57576269	0.03553731	1.24594736	0.9495442	1.24594736
ENSG00000114439	BBX	0.00013671	0.00054478	-1.1219922	0.29417367	3.72157543	0.91713889	0.10607044	0.58270448	0.8674837	0.8674837
ENSG00000171608	PIK3CD	0.00014123	0.00056111	-1.2002424	0.31535456	4.99990765	1.23324959	0.0934199	0.88166942	1.02537571	1.02537571
ENSG00000145536	ADAMTS16	0.00014204	0.00056394	-1.3050671	0.34302491	2.05527235	1.62606994	0.17472208	1.14902144	0.96185307	1.14902144
ENSG00000164049	FBXW12	0.00014362	0.00056894	-1.2603459	0.33150886	1.67422991	1.5182853	0.16293068	1.07342321	0.97070768	1.07342321
ENSG00000204524	ZNF805	0.00014506	0.00057379	-1.1568647	0.30448783	4.12973395	0.97149562	0.12679524	0.6018593	0.91622423	0.91622423
ENSG00000157734	SNX22	0.00014526	0.00057446	-1.4274241	0.37573378	3.37606953	1.94982336	0.13539379	1.4528348	0.85706137	1.4528348
ENSG00000107036	RIC1	0.00014599	0.0005768	-1.1025137	0.29030373	4.16295161	1.14068422	0.02775153	0.89682751	0.92035637	0.92035637
ENSG00000106261	ZKSCAN1	0.00014753	0.00058216	-1.2147362	0.32007319	6.5978058	0.44855891	0.10618877	0.06389149	1.04633823	1.04633823
ENSG00000154262	ABCA6	0.0001475	0.00058216	-1.1972775	0.31546819	2.22452633	1.04227316	0.16637077	0.61582818	0.95323127	0.95323127
ENSG00000162946	DISC1	0.00014988	0.00059068	-1.2235497	0.32272816	3.44310101	1.43732574	0.05086002	1.1208665	0.85770382	1.1208665
ENSG00000197937	ZNF347	0.00015011	0.00059143	-1.1995261	0.31642296	2.52674771	0.66706385	0.19827258	0.20120261	0.92811671	0.92811671
ENSG00000211455	STK38L	0.00015079	0.0005934	-1.0964063	0.28930703	3.15483209	0.61959479	0.0799367	0.31717348	0.86167207	0.86167207
ENSG00000176208	ATAD5	0.00015201	0.00059775	-1.1625427	0.30692019	2.79379383	0.95052325	0.16449033	0.54027578	0.89525968	0.89525968
ENSG00000120802	TMPO	0.0001523	0.00059863	-1.099128	0.29021559	3.90125423	0.69055926	0.06267355	0.40546559	0.88485867	0.88485867
ENSG00000198393	ZNF26	0.0001528	0.00060028	-1.1282214	0.29796146	2.34381837	0.3811494	0.05339453	0.08743089	0.94539204	0.94539204
ENSG00000085788	DDHD2	0.0001541	0.00060438	-1.0925409	0.28869884	3.37660036	0.86940221	0.0805908	0.57227502	0.85706318	0.85706318
ENSG00000106804	C5	0.00015478	0.00060657	-1.2798365	0.33828777	3.95939709	1.57794044	0.06761983	1.21981456	0.89263181	1.21981456
ENSG00000148734	NPFFR1	0.00015538	0.00060821	-1.1730458	0.31014068	3.01021899	1.20439124	0.21042654	0.74782643	0.87167991	0.87167991
ENSG00000284925	GCSAM	0.00015622	0.00061043	-1.1420283	0.30204614	1.71630282	1.08603661	0.05592491	0.79586111	0.97043363	0.97043363
ENSG00000174500	GCSAM	0.00015622	0.00061043	-1.1420283	0.30204614	1.71630282	1.08603661	0.05592491	0.79586111	0.97043363	0.97043363
ENSG00000095564	BTAF1	0.00016078	0.00062674	-1.1705125	0.31016803	3.98140226	0.38766092	0.18659797	-0.0580053	0.89569935	0.89569935
ENSG00000116001	TIA1	0.00016107	0.00062743	-1.0952593	0.29026201	4.02561712	0.74098979	0.04588554	0.47520028	0.90194987	0.90194987
ENSG00000162086	ZNF75A	0.00016233	0.00063202	-1.1564695	0.30664114	4.32435478	0.89120458	0.11746853	0.52968796	0.94035537	0.94035537
ENSG00000196417	ZNF765	0.00016293	0.00063406	-1.121329	0.29739669	1.99529224	0.6663508	0.03079501	0.4031565	0.9642089	0.9642089
ENSG00000168004	PLAAT5	0.00016336	0.00063526	-1.2390002	0.32866205	1.23414172	1.40518212	0.25159551	0.88005324	0.96361533	0.96361533
ENSG00000123600	METTL8	0.00016455	0.00063944	-1.1477466	0.30460246	2.7681624	0.73716409	0.14537182	0.3489869	0.89843307	0.89843307
ENSG00000134516	DOCK2	0.00016541	0.00064229	-1.4652023	0.38898606	3.31188103	2.08273858	0.03948842	1.66275085	0.85725885	1.66275085
ENSG00000180934	OR56A1	0.00016539	0.00064229	-1.432996	0.38043314	1.97716327	1.99216171	0.14405147	1.484154	0.96484937	1.484154
ENSG00000262599	DENND11	0.00016553	0.00064264	-1.2313767	0.32692629	4.86420442	1.47115203	0.16767842	1.03473061	1.01053206	1.03473061
ENSG00000101680	LAMA1	0.00016688	0.00064757	-1.3773821	0.36588741	2.09631011	1.84230195	0.17307415	1.33300383	0.96003096	1.33300383
ENSG00000272578		0.00016701	0.00064789	-1.0876522	0.28893778	2.87280883	1.06997125	0.05336891	0.80559138	0.88583783	0.88583783
ENSG00000256771	ZNF253	0.00016715	0.0006483	-1.10162	0.29266544	3.26338452	1.17866523	0.08535776	0.87823919	0.85799137	0.87823919
ENSG00000185621	LMLN	0.00016935	0.00065522	-1.1097004	0.29506734	2.73874837	0.71552674	0.07736157	0.41164593	0.90211672	0.90211672
ENSG00000102763	VWA8	0.00017351	0.00066861	-1.084941	0.28895122	3.42796448	1.1478203	0.03726601	0.90202808	0.8574881	0.90202808
ENSG00000255585		0.00017486	0.00067268	-1.3908743	0.37062168	1.45761298	1.88798572	0.16514656	1.38015826	0.96944534	1.38015826
ENSG00000152256	PDK1	0.00017657	0.00067863	-1.1369216	0.30314926	1.99192755	1.11756589	0.06953882	0.8165774	0.96433027	0.96433027
ENSG00000109684	CLNK	0.00017735	0.00068094	-1.3410865	0.35769207	3.33106091	1.75790645	0.15057793	1.28878775	0.85711106	1.28878775
ENSG00000006468	ETV1	0.00017788	0.00068268	-1.1552166	0.30817956	1.50728459	1.20865062	0.09833993	0.87229757	0.9701248	0.9701248
ENSG00000108370	RGS9	0.00017832	0.00068404	-1.3383509	0.35709356	2.83339886	1.75177752	0.17619438	1.25835846	0.89045565	1.25835846
ENSG00000085832	EPS15	0.00017926	0.00068712	-1.0525735	0.28094204	3.73897396	1.08414913	0.00593088	0.88201395	0.86852841	0.88201395
ENSG00000103995	CEP152	0.00018046	0.00069127	-1.1501964	0.30713641	2.22806119	1.08136841	0.10822371	0.73518197	0.95301997	0.95301997
ENSG00000149308	NPAT	0.00018154	0.00069505	-1.1191131	0.29895526	3.71855584	1.22722634	0.03817336	0.9672869	0.86731988	0.9672869
ENSG00000053328	METTL24	0.00018256	0.00069831	-1.3068371	0.34923501	1.52359562	1.67449547	0.10232286	1.2697844	0.97029785	1.2697844
ENSG00000160185	UBASH3A	0.00018437	0.00070406	-1.5001355	0.40115712	2.51953007	2.20884682	0.07983785	1.73059125	0.92892942	1.73059125
ENSG00000196110	ZNF699	0.00018485	0.00070538	-1.1247556	0.30082754	2.36378197	0.90077537	0.07417738	0.59674766	0.94391619	0.94391619
ENSG00000228049	POLR2J2	0.00018567	0.00070751	-1.4816903	0.39641159	2.35056457	2.15650122	0.38343182	1.38441734	0.94490489	1.38441734
ENSG00000188352	FOCAD	0.00018765	0.00071422	-1.1038431	0.29553369	3.70887184	0.74659906	0.11574857	0.4073818	0.86682823	0.86682823
ENSG00000134489	HRH4	0.00018816	0.0007158	-1.2303541	0.32946425	1.40760984	1.48909564	0.18475895	1.03639135	0.9685316	1.03639135
ENSG00000137760	ALKBH8	0.00018928	0.00071941	-1.0685853	0.28626101	2.99253212	1.00859999	0.04859502	0.75591032	0.87329036	0.87329036
ENSG00000146166	LGSN	0.00018948	0.00071977	-1.3036407	0.34925331	1.94229719	1.6730458	0.1272764	1.24497469	0.9659881	1.24497469
ENSG00000205038	PKHD1L1	0.00018951	0.00071977	-1.7411135	0.46646105	2.28760449	2.9843884	0.25932435	2.18851719	0.94926816	2.18851719
ENSG00000113448	PDE4D	0.00019145	0.00072678	-1.0737386	0.28786219	3.5052049	0.88774702	0.07324139	0.60618594	0.85898582	0.85898582
ENSG00000102189	EEA1	0.00019332	0.0007327	-1.0885877	0.29203574	2.3934421	0.77869102	0.01794258	0.54432052	0.94151225	0.94151225
ENSG00000155875	SAXO1	0.0001937	0.00073378	-1.2855123	0.34491032	1.28745259	1.63075491	0.13755468	1.20078054	0.96541043	1.20078054
ENSG00000166206	GABRB3	0.00019485	0.00073725	-1.1248464	0.30192309	2.0797137	1.17575057	0.06473399	0.88586756	0.96078848	0.96078848
ENSG00000196950	SLC39A10	0.00019648	0.00074197	-1.1106268	0.29827466	2.45395153	0.67232526	0.06498956	0.37967262	0.93589787	0.93589787
ENSG00000105613	MAST1	0.00019779	0.00074647	-1.1581882	0.3111887	1.75131396	1.26694853	0.11935763	0.9092495	0.97007445	0.97007445
ENSG00000180998	GPR137C	0.00019822	0.00074792	-1.1040896	0.29669708	3.57943331	1.1655243	0.12905745	0.82011544	0.86127055	0.86127055
ENSG00000177614	PGBD5	0.00020013	0.00075407	-1.1288128	0.30353748	1.07324748	1.14845766	0.07980116	0.84130306	0.95671763	0.95671763
ENSG00000270629	NBPF14	0.00020026	0.00075438	-1.1848919	0.31863203	5.95934684	0.518164	0.07458653	0.18018981	1.06758516	1.06758516
ENSG00000083844	ZNF264	0.00020175	0.00075891	-1.0463565	0.28151951	3.20099515	0.79856884	0.03185604	0.56811578	0.85974286	0.85974286
ENSG00000166398	GARRE1	0.00020174	0.00075891	-1.132936	0.30481239	1.70441756	0.93421025	0.07471576	0.62663828	0.97052844	0.97052844
ENSG00000283201		0.00020207	0.00075993	-1.1945086	0.32141374	1.93019909	1.25370926	0.19584675	0.80271831	0.96635468	0.96635468
ENSG00000092847	AGO1	0.00020217	0.00076015	-1.1474704	0.30876789	4.60236982	0.3215561	0.09221847	-0.0205104	0.98032961	0.98032961
ENSG00000213973	ZNF99	0.00020538	0.00077113	-1.209809	0.32589158	1.6586957	1.2114184	0.22404423	0.72436542	0.97076561	0.97076561
ENSG00000183439	TRIM61	0.00021162	0.00079198	-1.1844271	0.3197071	2.2226241	1.09919337	0.19654762	0.64948942	0.95334444	0.95334444
ENSG00000088756	ARHGAP28	0.00021183	0.00079259	-1.1410507	0.30802001	1.31259423	0.83112933	0.10118841	0.49172828	0.96617026	0.96617026
ENSG00000115993	TRAK2	0.00021306	0.00079664	-1.0802159	0.29171355	3.93356033	0.71099971	0.06823396	0.42869252	0.88910501	0.88910501
ENSG00000162402	USP24	0.00021335	0.00079752	-1.0516577	0.28402748	2.92056296	0.89251231	0.02702784	0.66634988	0.88052778	0.88052778
ENSG00000284845		0.00021464	0.00080142	-1.7039941	0.46039828	1.57717312	2.89785836	0.30936462	2.07525934	0.97069054	2.07525934
ENSG00000259529		0.00021464	0.00080142	-1.7039941	0.46039828	1.57717312	2.89785836	0.30936462	2.07525934	0.97069054	2.07525934
ENSG00000270392	PFN1P2	0.00021944	0.00081784	-1.189819	0.32196331	1.85773701	1.41635037	0.17581817	0.99036102	0.96824391	0.99036102
ENSG00000099139	PCSK5	0.00022076	0.00082235	-1.6045762	0.43437403	6.59989613	2.57761355	0.01952299	2.10313597	1.04620788	2.10313597
ENSG00000136381	IREB2	0.00022313	0.00083004	-1.0752314	0.29128974	3.48536167	0.60732111	0.0960498	0.29749445	0.85850949	0.85850949
ENSG00000233757		0.00022397	0.00083259	-1.1044859	0.29929247	0.39018683	0.53366427	0.10254989	0.20369905	0.90517993	0.90517993
ENSG00000137968	SLC44A5	0.0002273	0.00084302	-1.420747	0.38538458	2.16320293	2.02743229	0.14609681	1.52476756	0.9566931	1.52476756
ENSG00000251369	ZNF550	0.00022792	0.00084497	-1.2075214	0.32760832	3.70253029	1.46499525	0.0566357	1.1507954	0.86651785	1.1507954
ENSG00000140795	MYLK3	0.00022818	0.00084551	-1.0961265	0.29740936	2.1092403	0.97408855	0.03566736	0.72216754	0.95942135	0.95942135
ENSG00000282086	PKD1P6	0.00022829	0.00084572	-1.1430934	0.31016301	3.14306537	0.8600517	0.22000732	0.40142538	0.86225498	0.86225498
ENSG00000172379	ARNT2	0.00022835	0.00084575	-1.1262394	0.3055954	2.0446087	1.18329938	0.08832263	0.86934967	0.96229854	0.96229854
ENSG00000138182	KIF20B	0.00022865	0.00084637	-1.3013433	0.35314064	3.64899275	1.70210141	0.04374214	1.35922633	0.86404163	1.35922633
ENSG00000268173		0.0002327	0.0008581	-2.1929079	0.59580362	2.29469445	4.84280053	0.87361815	3.11992883	0.94879717	3.11992883
ENSG00000089916	GPATCH2L	0.00023458	0.00086385	-1.0541227	0.28656046	3.30209436	0.84749595	0.0664505	0.58012787	0.85736462	0.85736462
ENSG00000114331	ACAP2	0.00023546	0.00086671	-1.0355697	0.28159021	3.74858586	0.90426492	0.02287001	0.68897618	0.86917677	0.86917677
ENSG00000215790	SLC35E2A	0.00023561	0.00086706	-1.1890082	0.32332713	2.87876628	1.42571544	0.10006675	1.07601309	0.88515686	1.07601309
ENSG00000111012	CYP27B1	0.00023696	0.00087181	-1.1737436	0.31930252	1.54789616	1.39023531	0.10910488	1.03787874	0.97050944	1.03787874
ENSG00000100934	SEC23A	0.00023952	0.00088026	-1.0463861	0.28486981	2.88501322	0.89473303	0.02849849	0.66928349	0.88444813	0.88444813
ENSG00000107099	DOCK8	0.00024166	0.0008869	-1.2203356	0.33243152	5.54772949	0.80314404	0.18255091	0.34558332	1.06069462	1.06069462
ENSG00000276386	CNTNAP3P2	0.00024386	0.00089335	-1.6233616	0.44249906	1.4576438	2.66796945	0.33224542	1.87056559	0.96944584	1.87056559
ENSG00000144935	TRPC1	0.00024382	0.00089335	-1.3704052	0.37354281	2.22020935	1.90124917	0.17974787	1.39001221	0.95348757	1.39001221
ENSG00000274726	ARHGEF10	0.00024528	0.00089792	-1.0952307	0.2986607	2.66176367	1.20467638	0.09165621	0.90112293	0.91182367	0.91182367
ENSG00000186001	LRCH3	0.00024565	0.00089909	-1.0394766	0.28348708	3.41771915	1.0813233	0.04674056	0.84364426	0.85736486	0.85736486
ENSG00000140093	SERPINA10	0.00024686	0.00090289	-1.1717896	0.31968103	2.14609192	1.30809377	0.19211417	0.87220064	0.95759039	0.95759039
ENSG00000253731	PCDHGA6	0.00025098	0.00091691	-1.1814958	0.32270178	2.28445963	1.08892806	0.22205951	0.61488042	0.94947542	0.94947542
ENSG00000289716	XNDC1N-ZNF705EP-ALG1L9P	0.00025137	0.00091813	-1.3219916	0.36111467	2.41681032	1.77541825	0.42752807	1.03951473	0.93945009	1.03951473
ENSG00000036828	CASR	0.00025294	0.00092302	-1.1160635	0.30499649	2.26287765	1.20673635	0.09563678	0.89030235	0.95087037	0.95087037
ENSG00000263647	BPTFP1	0.0002532	0.00092336	-1.411661	0.38580508	1.3789977	2.02611156	0.15958562	1.51492696	0.96790614	1.51492696
ENSG00000198887	SMC5	0.00025339	0.00092384	-1.048136	0.28646914	3.394765	0.33487265	0.06606877	0.06148913	0.85715759	0.85715759
ENSG00000151413	NUBPL	0.00026031	0.00094671	-1.033839	0.28309628	3.00042817	1.06076888	0.02905201	0.84269118	0.87256243	0.87256243
ENSG00000158163	DZIP1L	0.00026097	0.00094868	-1.0581815	0.28981359	3.94884245	1.1366233	0.05372948	0.88529826	0.89117955	0.89117955
ENSG00000164794	KCNV1	0.00026214	0.00095207	-1.1329689	0.3103937	2.52568509	1.18757667	0.15563594	0.80343847	0.92823686	0.92823686
ENSG00000177839	PCDHB9	0.00026317	0.00095475	-1.0612105	0.29081505	0.27256634	0.83691859	0.05830351	0.57460701	0.89314714	0.89314714
ENSG00000184863	RBM33	0.00026345	0.00095532	-1.0590364	0.29024068	4.25813261	0.94505327	0.01626067	0.72754302	0.93143543	0.93143543
ENSG00000128872	TMOD2	0.00026903	0.00097425	-1.1242388	0.30856601	2.69708718	1.02845002	0.16377382	0.63725258	0.90737222	0.90737222
ENSG00000021645	NRXN3	0.00026936	0.00097524	-1.1517115	0.31613413	3.21184974	1.3582001	0.17413228	0.95020158	0.85936939	0.95020158
ENSG00000171456	ASXL1	0.00027153	0.00098218	-1.0669852	0.29304303	4.17136912	0.70608508	0.04473216	0.45270531	0.92135278	0.92135278
ENSG00000110075	PPP6R3	0.00027674	0.00099931	-1.0809042	0.29726572	4.53980243	0.39882203	0.02210962	0.1569683	0.97201809	0.97201809
ENSG00000122254	HS3ST2	0.00027702	0.0009996	-1.3493647	0.37112358	1.81585597	1.87041404	0.20173817	1.34775486	0.96909763	1.34775486
ENSG00000281526	ZNF546	0.0002776	0.00100125	-1.115479	0.30684219	1.48291054	0.90281042	0.08939147	0.58763461	0.96981998	0.96981998
ENSG00000187187	ZNF546	0.0002776	0.00100125	-1.115479	0.30684219	1.48291054	0.90281042	0.08939147	0.58763461	0.96981998	0.96981998
ENSG00000213967	ZNF726	0.00027796	0.00100209	-1.1886411	0.32699724	2.42008311	1.45194501	0.10799809	1.09493286	0.93915018	1.09493286
ENSG00000165490	DDIAS	0.00027849	0.00100332	-1.140633	0.31383232	1.41821764	1.13083834	0.13927607	0.7587019	0.96874457	0.96874457
ENSG00000162636	FAM102B	0.00028332	0.00101909	-1.1194403	0.30837769	4.42771727	0.97769661	0.11426991	0.63721633	0.9555691	0.9555691
ENSG00000130699	TAF4	0.00028521	0.00102524	-1.163922	0.3207832	2.37272958	1.39633898	0.18796737	0.96967855	0.94321737	0.96967855
ENSG00000119231	SENP5	0.00028886	0.00103724	-1.0388426	0.28656982	3.28773933	0.73905632	0.06631773	0.47615453	0.85755774	0.85755774
ENSG00000120549	KIAA1217	0.00028951	0.00103862	-1.1222785	0.30963616	5.47774567	1.00084992	0.02076567	0.75303895	1.05782301	1.05782301
ENSG00000274746	ZNF100	0.00029081	0.00104212	-1.1457102	0.31620171	1.82819659	0.67416294	0.15595049	0.27522677	0.96886412	0.96886412
ENSG00000213949	ITGA1	0.00029148	0.00104429	-1.2679175	0.34998694	3.8525287	1.66120256	0.05055008	1.32747206	0.87893561	1.32747206
ENSG00000170959	DCDC1	0.00029332	0.00104996	-1.171926	0.3236358	4.68368448	1.42023394	0.06535925	1.1129672	0.9896452	1.1129672
ENSG00000135747	ZNF670-ZNF695	0.00029787	0.00106459	-1.2383789	0.34236394	2.54354947	1.5887174	0.0999751	1.21867189	0.926195	1.21867189
ENSG00000071189	SNX13	0.00029891	0.00106781	-1.1193176	0.30952486	4.34081266	0.37948148	0.13510995	0.00790036	0.94270348	0.94270348
ENSG00000171033	PKIA	0.00030125	0.00107521	-1.4459032	0.40005887	1.82063363	2.16865071	0.14445757	1.65607235	0.96900901	1.65607235
ENSG00000144468	RHBDD1	0.00030213	0.00107648	-1.0136232	0.28051297	3.08202689	1.03174788	0.01928264	0.83096763	0.86595202	0.86595202
ENSG00000090612	ZNF268	0.0003025	0.00107731	-1.0517868	0.29109983	3.16028781	0.34558601	0.09190043	0.04506856	0.8614146	0.8614146
ENSG00000168621	GDNF	0.00030545	0.00108685	-1.1035668	0.30564364	0.90492832	0.86339483	0.10373385	0.53832432	0.94721904	0.94721904
ENSG00000118620	ZNF430	0.00030648	0.00109002	-1.0810519	0.29948008	2.14353776	0.92352364	0.05127181	0.66149235	0.95772177	0.95772177
ENSG00000136014	USP44	0.00030955	0.00109923	-1.1120052	0.30827566	0.86324579	1.12080137	0.12460931	0.7756671	0.94452187	0.94452187
ENSG00000188199	NUTM2B	0.00031201	0.00110727	-1.6512313	0.45802442	2.25473133	2.83999083	0.19360422	2.1664924	0.95138448	2.1664924
ENSG00000181450	ZNF678	0.00031424	0.00111492	-1.0858278	0.30134509	2.15691545	1.05185194	0.06457341	0.7767243	0.95702629	0.95702629
ENSG00000147162	OGT	0.00032312	0.0011439	-1.2295381	0.34191597	5.98606503	0.43042678	0.2477424	-0.1031245	1.06745609	1.06745609
ENSG00000113327	GABRG2	0.00032334	0.00114443	-1.2172566	0.33851737	3.93161954	1.54986217	0.26211516	1.02706742	0.88884424	1.02706742
ENSG00000129315	CCNT1	0.00032476	0.00114897	-1.0200879	0.28377535	3.51826288	1.08900561	0.01660598	0.88933908	0.85933167	0.88933908
ENSG00000155903	RASA2	0.0003334	0.00117564	-1.0571451	0.29464463	2.47581021	1.0462655	0.04300835	0.80452894	0.93366556	0.93366556
ENSG00000089154	GCN1	0.00034102	0.00119992	-1.043108	0.29121143	3.46473232	0.70365998	0.09596638	0.40877679	0.8580797	0.8580797
ENSG00000148942	SLC5A12	0.00034317	0.00120693	-1.1199798	0.31281526	1.67526735	1.14470724	0.13014765	0.79099435	0.97070298	0.97070298
ENSG00000094804	CDC6	0.00034391	0.00120894	-1.0963527	0.30626416	1.44388934	1.13739886	0.08600709	0.83785763	0.9692174	0.9692174
ENSG00000175175	PPM1E	0.000345	0.00121205	-1.117637	0.31228216	2.8741627	1.0995226	0.21141903	0.6647761	0.88568265	0.88568265
ENSG00000134962	KLB	0.00035288	0.0012373	-1.1016621	0.30832746	2.35698535	1.18200566	0.1250593	0.84191771	0.94443119	0.94443119
ENSG00000166833	NAV2	0.00035604	0.00124594	-1.0191981	0.28543428	2.77776145	0.98848545	0.01932837	0.78471538	0.89723984	0.89723984
ENSG00000283034	ZNF445	0.00035904	0.00125535	-1.0571597	0.29624807	2.1201047	0.59667352	0.02843685	0.36175088	0.95889596	0.95889596
ENSG00000176749	CDK5R1	0.00036067	0.00125968	-1.0830546	0.30360564	1.73902179	1.04851346	0.06677018	0.77229814	0.97021418	0.97021418
ENSG00000136531	SCN2A	0.00036189	0.00126368	-1.5849352	0.44440525	3.09437381	2.66315898	0.10658902	2.11524132	0.86511127	2.11524132
ENSG00000288227		0.00036528	0.00127469	-1.0397052	0.29172632	2.58362464	0.97911959	0.03595855	0.75036823	0.92146423	0.92146423
ENSG00000260103		0.00036528	0.00127469	-1.0397052	0.29172632	2.58362464	0.97911959	0.03595855	0.75036823	0.92146423	0.92146423
ENSG00000174197	MGA	0.00036744	0.00128195	-1.2049168	0.33822923	4.78611407	1.54200644	0.0106828	1.27630608	1.00145131	1.27630608
ENSG00000174059	CD34	0.00036968	0.00128837	-1.188775	0.33384757	1.58026172	1.13955531	0.28315485	0.60193862	0.97070492	0.97070492
ENSG00000169607	CKAP2L	0.00037136	0.00129367	-1.0703573	0.30069255	0.98514311	1.11356594	0.06515165	0.84539427	0.95202848	0.95202848
ENSG00000107263	RAPGEF1	0.00037308	0.00129937	-1.1618382	0.3265032	5.75100806	1.16375883	0.13304279	0.78895303	1.06625601	1.06625601
ENSG00000101489	CELF4	0.00037934	0.00131946	-1.2260542	0.34497323	2.20432271	1.6027603	0.24239278	1.09643064	0.95441434	1.09643064
ENSG00000151474	FRMD4A	0.00037991	0.0013208	-1.1051262	0.31098239	2.62728102	0.96444874	0.17186012	0.57232621	0.91612789	0.91612789
ENSG00000240445	FOXO3B	0.00038109	0.00132439	-1.0740752	0.3023139	0.56998515	0.75376789	0.10625063	0.43674737	0.92192844	0.92192844
ENSG00000102908	NFAT5	0.00038287	0.0013303	-1.0920257	0.30747266	4.83758795	1.09374052	0.05611451	0.82517581	1.00745415	1.00745415
ENSG00000197563	PIGN	0.00038556	0.00133851	-1.1433752	0.32209819	5.3504319	1.39664877	0.01004315	1.15711335	1.05142243	1.15711335
ENSG00000134318	ROCK2	0.00038575	0.00133887	-1.1182599	0.31503424	4.51018814	0.31027537	0.14872148	-0.0756514	0.96780249	0.96780249
ENSG00000166473	PKD1L2	0.00038715	0.00134271	-1.0572495	0.29792639	2.49029349	0.99775204	0.06641714	0.73172743	0.93213438	0.93213438
ENSG00000113441	LNPEP	0.00038733	0.00134292	-1.0992954	0.30978583	4.15351107	1.29175769	0.00936661	1.07026505	0.91921302	1.07026505
ENSG00000113361	CDH6	0.00038918	0.00134845	-1.1192081	0.31550855	1.6006865	1.14295943	0.14911124	0.77058796	0.97077723	0.97077723
ENSG00000248329	APELA	0.00039295	0.00135947	-1.2146392	0.34265639	1.64778559	1.57982902	0.2266908	1.09420994	0.97079241	1.09420994
ENSG00000263002	ZNF234	0.00039557	0.00136647	-1.0366052	0.29257649	2.62609347	0.88383989	0.0467363	0.64391652	0.91627498	0.91627498
ENSG00000205189	ZBTB10	0.00039615	0.0013682	-1.2150803	0.34298795	4.95821977	0.52446877	0.30243319	-0.0552965	1.02102506	1.02102506
ENSG00000176927	EFCAB5	0.00039847	0.00137425	-1.1785728	0.33282741	1.61273729	1.48994441	0.1896406	1.05656785	0.97080129	1.05656785
ENSG00000261934	PCDHGA9	0.00039879	0.00137493	-1.1991248	0.3386511	1.99257587	1.44268257	0.32589443	0.86275889	0.96430697	0.96430697
ENSG00000153283	CD96	0.0003992	0.00137605	-1.0826354	0.30577606	3.85294743	1.25752908	0.1417299	0.91013384	0.87898352	0.91013384
ENSG00000141384	TAF4B	0.000404	0.00139111	-1.0810304	0.3055951	3.34815069	1.01312003	0.193575	0.61033931	0.85704411	0.85704411
ENSG00000183808	RBM12B	0.00040414	0.00139129	-1.1930904	0.33728194	4.56729718	1.52952199	0.01623178	1.26355821	0.9757859	1.26355821
ENSG00000077044	DGKD	0.00040818	0.001404	-1.0709597	0.30298117	2.3120923	0.79996938	0.08510335	0.50618895	0.94761956	0.94761956
ENSG00000236829		0.00041029	0.00141006	-1.1518023	0.3259777	3.06975079	1.42814235	0.11194404	1.08349738	0.8668321	1.08349738
ENSG00000151718	WWC2	0.00041263	0.00141659	-1.1319863	0.32050587	3.45024734	1.38039132	0.06428981	1.09135532	0.85781933	1.09135532
ENSG00000196233	LCOR	0.0004235	0.0014499	-1.1662083	0.33084011	5.11084973	0.55395289	0.1958448	0.10385781	1.03552592	1.03552592
ENSG00000075218	GTSE1	0.00042385	0.0014508	-1.1086701	0.31453686	1.84911609	1.32525808	0.14456727	0.96512749	0.96843385	0.96843385
ENSG00000162849	KIF26B	0.00042903	0.00146696	-1.3656027	0.38778421	2.73035184	2.01865294	0.24280069	1.44893599	0.90317377	1.44893599
ENSG00000101098	RIMS4	0.00043513	0.001485	-1.8889173	0.53695918	1.83328122	3.86902136	0.25422036	2.98943765	0.96876353	2.98943765
ENSG00000165124	SVEP1	0.00043646	0.00148921	-1.0582439	0.30089424	3.7533849	1.21481807	0.09400467	0.92454042	0.86951875	0.92454042
ENSG00000164303	ENPP6	0.00043944	0.00149874	-1.0398355	0.29581196	0.40769732	0.61912202	0.07752739	0.34254241	0.90690067	0.90690067
ENSG00000120253	NUP43	0.00043987	0.0014999	-1.0037356	0.2855636	3.44504607	0.53860503	0.05966448	0.29280945	0.8577344	0.8577344
ENSG00000116981	NT5C1A	0.0004486	0.00152739	-1.2250333	0.34904119	1.67222467	1.33470498	0.39986822	0.66676361	0.97071646	0.97071646
ENSG00000124613	ZNF391	0.00045107	0.00153517	-1.0591872	0.30191366	1.94875985	1.06655131	0.05967216	0.80766243	0.96578626	0.96578626
ENSG00000196263	ZNF471	0.00045248	0.00153962	-1.106697	0.31553031	3.43106515	1.33459744	0.04426972	1.07577329	0.85752904	1.07577329
ENSG00000118007	STAG1	0.00045602	0.00155005	-1.0678095	0.3046235	4.51750189	1.14185871	0.07509268	0.86529046	0.96885645	0.96885645
ENSG00000138411	HECW2	0.00045649	0.00155133	-1.15346	0.32908362	3.58540923	1.45137194	0.07349355	1.14483675	0.86148636	1.14483675
ENSG00000270231	NBPF8	0.00045845	0.00155733	-1.2451503	0.35535869	3.40546746	1.69219592	0.12052967	1.30011805	0.85724222	1.30011805
ENSG00000121621	KIF18A	0.00046384	0.00157364	-1.0605697	0.30294945	1.82575976	1.06127416	0.06359525	0.79780274	0.96891143	0.96891143
ENSG00000255769	GOLGA2P10	0.00046983	0.00159196	-1.5354977	0.43904098	2.50742778	2.58133307	0.24911968	1.91939635	0.93027363	1.91939635
ENSG00000242294	STAG3L5P	0.00047081	0.00159459	-1.0475248	0.29956338	3.07645618	1.20167633	0.05550524	0.9540497	0.86634601	0.9540497
ENSG00000031081	ARHGAP31	0.00047135	0.00159543	-1.0672518	0.3052317	3.42706669	1.24754433	0.13580244	0.91231943	0.85747655	0.91231943
ENSG00000164082	GRM2	0.00047133	0.00159543	-1.1792465	0.33726091	1.35102216	1.52310278	0.12987836	1.14975204	0.96722302	1.14975204
ENSG00000094916	CBX5	0.00047521	0.00160712	-1.0449028	0.29902582	4.46026085	0.29651386	0.04548798	0.04436242	0.96044696	0.96044696
ENSG00000196730	DAPK1	0.00047545	0.00160726	-1.0698105	0.30616564	3.73099536	0.70473184	0.18651747	0.30837246	0.8680283	0.8680283
ENSG00000285938		0.00047587	0.00160836	-1.2123582	0.34698448	2.15905644	1.61178364	0.1754403	1.17903981	0.95691329	1.17903981
ENSG00000204569	PPP1R10	0.00047902	0.00161832	-1.5174988	0.43453677	1.60037111	2.52733927	0.44517751	1.67907227	0.97077641	1.67907227
ENSG00000211899	IGHM	0.00048149	0.00162497	-2.3370173	0.66947007	3.14076461	5.9980957	0.10122747	4.94091195	0.86237341	4.94091195
ENSG00000144821	MYH15	0.0004818	0.00162534	-1.2395775	0.35511113	2.38178251	1.68761048	0.3857332	1.03293586	0.94248684	1.03293586
ENSG00000284548	METTL9	0.00048732	0.00164188	-2.1994912	0.63065441	2.06476132	5.3210232	0.45082542	4.02358064	0.96144697	4.02358064
ENSG00000136141	LRCH1	0.00049082	0.00165101	-1.0496452	0.30112757	3.49691996	1.21291557	0.02953892	0.99058649	0.85877961	0.99058649
ENSG00000159618	ADGRG5	0.00049085	0.00165101	-1.2659365	0.3631797	2.5076556	1.76429859	0.07317672	1.41069261	0.93024855	1.41069261
ENSG00000108389	MTMR4	0.00049154	0.00165266	-1.0078742	0.28917672	2.98603353	0.35348659	0.06686066	0.09568832	0.87390004	0.87390004
ENSG00000151892	GFRA1	0.00049494	0.00166306	-1.1883325	0.34113394	1.38144212	1.55626232	0.14076707	1.16842204	0.96796247	1.16842204
ENSG00000157654	PALM2AKAP2	0.00049517	0.00166348	-1.2063189	0.34630965	3.95190684	1.60382424	0.02450469	1.32471206	0.8915997	1.32471206
ENSG00000122786	CALD1	0.00049892	0.00167466	-1.0693954	0.30717941	2.32622918	1.2616092	0.11189657	0.94964429	0.94663977	0.94964429
ENSG00000185658	BRWD1	0.00050148	0.0016822	-1.0493137	0.30152987	4.47874881	0.3797604	0.05965594	0.11308452	0.96319703	0.96319703
ENSG00000173546	CSPG4	0.00050624	0.00169677	-1.3260316	0.38132493	2.17511394	1.94340214	0.09782543	1.53802246	0.95605082	1.53802246
ENSG00000282522	PKD1P1	0.00050901	0.001705	-1.9401985	0.55817497	2.86714699	4.163417	0.40676706	3.09827501	0.88648946	3.09827501
ENSG00000204116	CHIC1	0.00051034	0.00170909	-1.0115979	0.29108473	3.52230428	1.13218642	0.0745518	0.87866428	0.85944378	0.87866428
ENSG00000188033	ZNF490	0.00051136	0.00171144	-1.0152867	0.29219128	2.54364825	0.84420533	0.03429351	0.62452605	0.92618358	0.92618358
ENSG00000168280	KIF5C	0.00051753	0.0017303	-1.1695231	0.33689145	3.54621683	1.51599349	0.05665364	1.22017469	0.86015462	1.22017469
ENSG00000186094	AGBL4	0.00052399	0.00175043	-1.0387793	0.29951674	2.81142865	1.1978883	0.11258118	0.89665945	0.89310348	0.89665945
ENSG00000269001	ZNF818P	0.0005259	0.00175645	-1.0506655	0.30302942	2.51787119	1.06567236	0.10393679	0.76599109	0.92911507	0.92911507
ENSG00000102780	DGKH	0.00052891	0.0017654	-1.0893187	0.31431669	4.6544282	0.51815754	0.12505437	0.17187448	0.98638914	0.98638914
ENSG00000187790	FANCM	0.00052968	0.00176723	-1.0301341	0.29727285	4.01788029	1.04528953	0.09332205	0.76415811	0.90085335	0.90085335
ENSG00000232815	DUX4L50	0.00053208	0.00177452	-1.1589301	0.33455792	1.95757356	1.40778182	0.29369708	0.87783809	0.96550422	0.96550422
ENSG00000284946		0.0005454	0.00181517	-1.4164782	0.40969354	1.37194311	2.23887215	0.33215491	1.55614403	0.96774053	1.55614403
ENSG00000089335	ZNF302	0.0005494	0.00182736	-1.144193	0.33112812	5.04317244	1.09054373	0.20390313	0.65150776	1.02961247	1.02961247
ENSG00000277075	H2AC8	0.00055022	0.00182971	-1.1966568	0.34635145	3.65866298	1.59971729	0.03738722	1.31215521	0.86446865	1.31215521
ENSG00000068976	PYGM	0.00055098	0.00183186	-1.4592283	0.42239372	2.20764392	2.37918457	0.21505142	1.79213366	0.95422273	1.79213366
ENSG00000138246	DNAJC13	0.00055358	0.00183899	-0.9903881	0.28678684	3.34097683	0.64359364	0.06821039	0.39622501	0.8570649	0.8570649
ENSG00000185513	L3MBTL1	0.00055379	0.00183931	-1.1230538	0.32521259	4.05101587	0.60593313	0.28429851	0.08744275	0.90553782	0.90553782
ENSG00000274512	TBC1D3L	0.00055721	0.00184875	-1.9456432	0.56368794	2.58215469	4.23585099	0.17746223	3.39715888	0.92164096	3.39715888
ENSG00000136267	DGKB	0.00055877	0.00185316	-1.0760604	0.31182223	1.93775951	1.25788517	0.12774509	0.92723393	0.96612732	0.96612732
ENSG00000261556	SMG1P7	0.00055967	0.00185541	-1.3322108	0.38609882	2.57949409	1.98705104	0.21280818	1.46425514	0.92196028	1.46425514
ENSG00000151414	NEK7	0.00056054	0.00185791	-0.9910027	0.28724542	3.41991284	0.64961536	0.07084707	0.39947769	0.85738968	0.85738968
ENSG00000154874	CCDC144B	0.0005608	0.00185798	-1.5345585	0.44481254	2.94421487	2.63719925	0.24409492	1.98180976	0.8780375	1.98180976
ENSG00000182504	CEP97	0.00056148	0.00185986	-1.0101649	0.29283779	3.73480306	1.1429549	0.01328256	0.95144961	0.86826259	0.95144961
ENSG00000206579	XKR4	0.0005644	0.00186887	-1.0748612	0.31171916	1.1272777	0.96013199	0.1338716	0.61872088	0.9592778	0.9592778
ENSG00000138759	FRAS1	0.00056443	0.00186887	-1.146369	0.33245863	2.7925631	1.47295469	0.04521976	1.19822859	0.89541106	1.19822859
ENSG00000104381	GDAP1	0.00056483	0.00186981	-1.0712855	0.31070091	4.74966274	0.81785606	0.08881549	0.52053651	0.99720389	0.99720389
ENSG00000271519		0.0005669	0.00187589	-1.1730213	0.34030443	2.26696534	1.54311698	0.17143731	1.13139266	0.95060983	1.13139266
ENSG00000183775	KCTD16	0.00056912	0.00188248	-1.2565135	0.36463829	1.33418562	1.77150683	0.19752902	1.29828317	0.966778	1.29828317
ENSG00000128578	STRIP2	0.00057224	0.00189046	-1.0964223	0.31831639	2.14590114	1.34981139	0.16442972	0.97548021	0.95760023	0.97548021
ENSG00000223756	TSSC2	0.00057444	0.00189693	-1.0624416	0.3085438	2.49756177	1.07577634	0.13964053	0.73573886	0.93135136	0.93135136
ENSG00000197044	ZNF441	0.0005748	0.00189735	-0.9681605	0.2811774	3.3639673	1.04383025	0.03239827	0.84761845	0.85703496	0.85703496
ENSG00000121903	ZSCAN20	0.00057638	0.0019021	-0.9984745	0.29004415	2.79366539	0.83239008	0.05113764	0.60222982	0.89527547	0.89527547
ENSG00000166510	CCDC68	0.00057708	0.00190371	-1.1127206	0.32326191	1.99151573	1.06097566	0.21126039	0.62785011	0.96434505	0.96434505
ENSG00000154655	L3MBTL4	0.00059696	0.00196087	-1.0096529	0.29410293	2.3940177	0.83033833	0.03162285	0.61530342	0.94146318	0.94146318
ENSG00000050748	MAPK9	0.00059817	0.00196442	-1.1295437	0.32907878	4.80597031	1.21543027	0.21452407	0.77438733	1.00377043	1.00377043
ENSG00000266028	SRGAP2	0.00060204	0.00197475	-1.0394358	0.30298137	4.41902378	0.85568124	0.07846028	0.58240856	0.95426398	0.95426398
ENSG00000283022	HYDIN	0.00060814	0.00199233	-1.0519013	0.30685968	4.94964703	0.6760348	0.03922938	0.43383904	1.0201028	1.0201028
ENSG00000157423	HYDIN	0.00060814	0.00199233	-1.0519013	0.30685968	4.94964703	0.6760348	0.03922938	0.43383904	1.0201028	1.0201028
ENSG00000197121	PGAP1	0.00060954	0.00199651	-0.9813385	0.28632727	3.01298592	1.09030747	0.03433995	0.88797225	0.87143462	0.88797225
ENSG00000184434	LRRC19	0.00061198	0.00200286	-1.0907402	0.31834829	1.75124226	1.34766631	0.14773965	0.99239875	0.97007531	0.99239875
ENSG00000234420	ZNF37BP	0.00061887	0.00202376	-1.0187373	0.29759732	3.07839416	0.47069547	0.13013893	0.14736957	0.86620793	0.86620793
ENSG00000095370	SH2D3C	0.00062397	0.00203878	-1.0875046	0.31789306	2.9889708	1.34311922	0.1072146	1.02966539	0.87362331	1.02966539
ENSG00000253846	PCDHGA10	0.0006279	0.00204997	-1.0547363	0.30846856	3.05302102	1.10353152	0.2023697	0.70440767	0.86809986	0.86809986
ENSG00000042088	TDP1	0.00062868	0.00205125	-0.9840835	0.28783369	3.6821178	0.67814611	0.06650027	0.43549785	0.86554234	0.86554234
ENSG00000170006	TMEM154	0.00063042	0.0020557	-0.9814235	0.28711905	3.29244988	1.09536072	0.03002679	0.89739338	0.85748933	0.89739338
ENSG00000196663	TECPR2	0.00063136	0.00205834	-1.0140615	0.29670248	2.9090261	0.79991211	0.10858617	0.50565878	0.88177793	0.88177793
ENSG00000101292	PROKR2	0.00063759	0.00207696	-1.110695	0.32523068	1.91192495	1.40502839	0.18427904	1.00568969	0.96688058	1.00568969
ENSG00000197779	ZNF81	0.00063865	0.00207999	-1.0631321	0.3113446	1.57146639	0.99297052	0.11986233	0.67099889	0.97066159	0.97066159
ENSG00000255104	ZNF286A-TBC1D26	0.00064728	0.00210301	-1.4011489	0.41077518	2.24985229	2.24045097	0.25466228	1.6436205	0.95168913	1.6436205
ENSG00000156531	PHF6	0.00065122	0.00211495	-1.1550522	0.33879114	4.71635889	1.52377488	0.01142611	1.27984252	0.99335886	1.27984252
ENSG00000173040	EVC2	0.00065927	0.00213851	-0.9815325	0.28817913	3.07841052	1.09626438	0.06807439	0.86022355	0.86620677	0.86620677
ENSG00000125966	MMP24	0.0006626	0.00214889	-1.0368229	0.30453563	2.61712035	1.1816745	0.12596363	0.86757131	0.91738331	0.91738331
ENSG00000107957	SH3PXD2A	0.00066662	0.00216019	-1.1199242	0.3291038	4.99974236	1.43698162	0.02504574	1.19343403	1.02535894	1.19343403
ENSG00000154124	OTULIN	0.0006693	0.00216712	-0.9831162	0.28899406	2.82116529	1.01153567	0.04764831	0.79385659	0.89192434	0.89192434
ENSG00000164659	ELAPOR2	0.00067153	0.0021739	-1.0412828	0.30617432	1.83970134	0.86099149	0.08597269	0.57955254	0.96863286	0.96863286
ENSG00000196660	SLC30A10	0.00067185	0.00217449	-1.1148761	0.32782589	1.5242202	1.22993605	0.23873141	0.77132125	0.97030398	0.97030398
ENSG00000148143	ZNF462	0.00067532	0.00218267	-1.0764984	0.31667235	2.67560024	0.52456997	0.21808239	0.09075517	0.91008308	0.91008308
ENSG00000106546	AHR	0.00067702	0.00218684	-0.9774302	0.28758772	3.85466961	0.66119892	0.05126916	0.43602095	0.87918116	0.87918116
ENSG00000157429	ZNF19	0.00067847	0.00219066	-0.9965178	0.29325448	3.58734584	0.75854951	0.10592242	0.4730885	0.86155725	0.86155725
ENSG00000278318	ZNF229	0.00068113	0.00219703	-1.3728398	0.40412527	2.61371234	2.16554655	0.1360765	1.70124236	0.91780277	1.70124236
ENSG00000101096	NFATC2	0.00068154	0.00219791	-1.0925517	0.32163192	4.02668974	1.37166114	0.00900595	1.15477384	0.90210184	1.15477384
ENSG00000080298	RFX3	0.00068255	0.0022003	-0.9655603	0.28428147	3.89975907	0.96954989	0.02451195	0.78091898	0.88466754	0.88466754
ENSG00000040933	INPP4A	0.00068781	0.00221549	-1.1028456	0.32490207	3.99753356	1.3993526	0.02790056	1.15966467	0.89797217	1.15966467
ENSG00000178175	ZNF366	0.0006893	0.00221895	-0.993797	0.29282721	0.52441489	0.63419595	0.0467821	0.40678163	0.91788039	0.91788039
ENSG00000170390	DCLK2	0.00069414	0.00223186	-1.0777649	0.31774821	1.67385889	1.24207201	0.16513483	0.8730463	0.97070933	0.97070933
ENSG00000164949	GEM	0.00070003	0.00224809	-1.0588139	0.31237425	1.61645552	1.08353804	0.12694292	0.7578246	0.97080592	0.97080592
ENSG00000139651	ZNF740	0.00070102	0.00224951	-0.9982942	0.29455328	3.28390962	0.63908067	0.11845137	0.33834358	0.857617	0.857617
ENSG00000114742	WDR48	0.00070103	0.00224951	-0.9482743	0.27979483	3.23770401	1.00841066	0.02210997	0.8292686	0.85859791	0.85859791
ENSG00000164106	SCRG1	0.00070207	0.00225197	-1.1187554	0.33013625	2.15242189	1.3337721	0.26887492	0.84512334	0.95726194	0.95726194
ENSG00000108506	INTS2	0.00070629	0.00226365	-1.0438895	0.30819316	3.86961927	1.25823065	0.03567261	1.03288641	0.88093603	1.03288641
ENSG00000114904	NEK4	0.00070794	0.00226718	-1.1856534	0.35011323	4.43029653	1.62369382	0.03651599	1.34250087	0.95595639	1.34250087
ENSG00000134013	LOXL2	0.00070832	0.00226795	-1.0620278	0.3136213	1.51941882	1.214211	0.13627522	0.88009617	0.9702559	0.9702559
ENSG00000120071	KANSL1	0.00070909	0.00226907	-1.2149101	0.35879984	4.55781779	1.70518951	0.05536141	1.39293352	0.9745051	1.39293352
ENSG00000132300	PTCD3	0.00071027	0.00227148	-0.9751598	0.28803293	3.6320963	1.09883686	0.02160295	0.91173047	0.86331869	0.91173047
ENSG00000008086	CDKL5	0.00071454	0.00228391	-0.9607707	0.28392083	3.67059678	1.05251827	0.04186576	0.84975363	0.86500839	0.86500839
ENSG00000197372	ZNF675	0.00071497	0.00228424	-0.9774239	0.2888561	2.71197886	0.83999726	0.03318417	0.63598938	0.90549157	0.90549157
ENSG00000147854	UHRF2	0.00071733	0.00228996	-0.9691655	0.28649217	3.46782636	0.58164106	0.06523504	0.34424603	0.8581398	0.8581398
ENSG00000183208	GDPGP1	0.00071732	0.00228996	-1.0961732	0.32403642	4.54314639	0.83806353	0.20876094	0.41068383	0.97248462	0.97248462
ENSG00000123552	USP45	0.00071816	0.00229208	-0.9712926	0.28714787	3.3054911	1.0678072	0.07028083	0.83294795	0.85732555	0.85732555
ENSG00000167528	ZNF641	0.0007228	0.00230517	-0.9909868	0.29312375	2.50438721	0.87025228	0.03600969	0.65876217	0.93060755	0.93060755
ENSG00000214756	CSKMT	0.00072617	0.00231359	-1.3463211	0.39837821	5.24240471	2.10079107	0.05172348	1.73371002	1.04486495	1.73371002
ENSG00000288579		0.00073144	0.00232764	-1.1633458	0.34443838	2.36248007	1.57011207	0.13837283	1.19630238	0.94401591	1.19630238
ENSG00000156869	FRRS1	0.00073116	0.00232764	-1.0067249	0.29805745	3.02922011	0.70124062	0.12939711	0.38735077	0.87003315	0.87003315
ENSG00000282928	MAP4K1	0.00073275	0.00233089	-1.0174323	0.30128087	2.85292032	1.20124024	0.07161007	0.94955423	0.88814499	0.94955423
ENSG00000104814	MAP4K1	0.00073275	0.00233089	-1.0174323	0.30128087	2.85292032	1.20124024	0.07161007	0.94955423	0.88814499	0.94955423
ENSG00000051341	POLQ	0.00073558	0.00233944	-1.0167221	0.30116528	1.78891438	0.81121251	0.05082574	0.5738664	0.96955518	0.96955518
ENSG00000286406		0.00073976	0.00234993	-1.1201747	0.33196231	1.85728224	1.45798704	0.21192879	1.0278097	0.96825412	1.0278097
ENSG00000113638	TTC33	0.00074027	0.00235109	-0.9638265	0.28564476	3.63402348	1.07949495	0.02522692	0.89269352	0.86339962	0.89269352
ENSG00000186854	TRABD2A	0.00074457	0.00236336	-1.0102169	0.2995349	2.75799402	1.1868493	0.08369171	0.9256713	0.89970237	0.9256713
ENSG00000151532	VTI1A	0.00074557	0.00236559	-1.005228	0.29808821	3.79504632	1.17537047	0.01414782	0.98548875	0.8729645	0.98548875
ENSG00000173166	RAPH1	0.00074673	0.00236882	-0.9827148	0.29144941	3.58812021	1.12355244	0.09173586	0.86387016	0.86158572	0.86387016
ENSG00000143127	ITGA10	0.00074727	0.0023696	-1.131531	0.33560453	2.19683058	1.48975274	0.19488237	1.07220961	0.95484243	1.07220961
ENSG00000116852	KIF21B	0.00074961	0.00237654	-1.1950739	0.35454133	4.05871033	1.66247843	0.01859575	1.39552424	0.90661763	1.39552424
ENSG00000114374	USP9Y	0.00075222	0.00238435	-1.4032746	0.41642635	3.76126055	2.29328619	0.20873921	1.74213346	0.87010563	1.74213346
ENSG00000141576	RNF157	0.0007582	0.00240141	-1.1348244	0.3369811	2.24856737	1.07138537	0.32573896	0.51432464	0.95176895	0.95176895
ENSG00000130052	STARD8	0.00075914	0.00240391	-1.3552697	0.40248217	3.76677453	2.14174945	0.30664301	1.51576584	0.87053508	1.51576584
ENSG00000179909	ZNF154	0.00076265	0.00241361	-1.1333363	0.3367006	3.26126654	1.49868193	0.05050537	1.22487667	0.85803552	1.22487667
ENSG00000147124	ZNF41	0.00076442	0.00241826	-1.0526946	0.31280232	3.89008766	1.29340539	0.03794069	1.0628188	0.88344422	1.0628188
ENSG00000107614	TRDMT1	0.00077207	0.00243863	-1.0350129	0.30779968	2.15575638	0.71086313	0.10874493	0.40658858	0.95708727	0.95708727
ENSG00000274114	ALOX15P1	0.00077206	0.00243863	-1.1238813	0.3342278	1.84198742	1.47626428	0.17497663	1.08174087	0.96858535	1.08174087
ENSG00000187605	TET3	0.00077427	0.00244511	-1.0510529	0.31264288	3.94622512	1.291644	0.01487507	1.08476257	0.89082174	1.08476257
ENSG00000144730	IL17RD	0.00077497	0.00244589	-1.0273901	0.30562702	2.09283788	1.03843059	0.09064681	0.76095123	0.96019176	0.96019176
ENSG00000187068	C3orf70	0.00078076	0.00246126	-1.1576695	0.34459304	1.88052262	1.56877847	0.19503906	1.14083499	0.96770631	1.14083499
ENSG00000164220	F2RL2	0.00078167	0.00246316	-1.0666411	0.31752775	1.36424095	1.29220376	0.166714	0.92709007	0.96755459	0.96755459
ENSG00000143515	ATP8B2	0.00078232	0.00246472	-1.0399839	0.30961329	3.33494409	1.26638184	0.06176792	1.01666147	0.85709056	1.01666147
ENSG00000145416	MARCHF1	0.00078382	0.00246848	-1.1926322	0.35511415	2.63823075	1.66586248	0.02675148	1.39194171	0.91476766	1.39194171
ENSG00000213047	DENND1B	0.00078457	0.00247036	-0.9592671	0.28565065	3.98407403	0.97537619	0.02188359	0.79182364	0.89607468	0.89607468
ENSG00000196357	ZNF565	0.00078811	0.00248054	-1.0345219	0.30817424	2.67138574	0.99445142	0.15781403	0.64619433	0.91061382	0.91061382
ENSG00000149289	ZC3H12C	0.00079663	0.00250295	-1.0367025	0.30909762	4.62816578	0.88176057	0.09139686	0.59710163	0.98344323	0.98344323
ENSG00000141622	RNF165	0.00080249	0.00252088	-1.1496005	0.3429662	2.21443713	1.55285815	0.1403715	1.18291887	0.95382729	1.18291887
ENSG00000151849	CENPJ	0.00080303	0.00252208	-0.9998964	0.29832077	3.44649691	1.05314151	0.14343926	0.73393455	0.85775763	0.85775763
ENSG00000138185	ENTPD1	0.00080805	0.00253735	-1.0037475	0.29962403	4.32746561	0.76613207	0.06916786	0.51475135	0.94079595	0.94079595
ENSG00000197961	ZNF121	0.00081847	0.00256709	-1.177553	0.35187913	5.80613254	0.35095564	0.3259457	-0.2378977	1.06701718	1.06701718
ENSG00000177494	ZBED2	0.00082022	0.00257206	-1.5974214	0.47742943	1.66678038	3.00741272	0.23116223	2.33314991	0.97073836	2.33314991
ENSG00000143476	DTL	0.00082184	0.00257664	-1.2383579	0.37017485	2.22624551	1.80786291	0.28265308	1.25892786	0.95312866	1.25892786
ENSG00000186188	FFAR4	0.0008292	0.00259668	-1.1343473	0.33933436	1.78480131	1.5188104	0.20015305	1.09525979	0.96961874	1.09525979
ENSG00000157388	CACNA1D	0.00083106	0.00260202	-1.0515291	0.31461849	4.13548949	1.30553994	0.08351927	1.03005969	0.91696101	1.03005969
ENSG00000175356	SCUBE2	0.00083747	0.00261952	-1.1242141	0.33658043	2.39822417	1.49386034	0.26521284	1.00925897	0.94110185	1.00925897
ENSG00000056586	RC3H2	0.00083871	0.00262238	-1.0401664	0.31145559	4.82036713	0.30273079	0.08585136	0.0122387	1.00545018	1.00545018
ENSG00000255150	EID3	0.00084043	0.00262726	-1.0357792	0.31019484	2.21845368	1.22127837	0.12889314	0.90534809	0.95359126	0.95359126
ENSG00000109184	DCUN1D4	0.00084627	0.0026445	-0.9461029	0.28350212	2.92905892	1.02702028	0.02457963	0.84652727	0.87962168	0.87962168
ENSG00000167258	CDK12	0.00085126	0.00265752	-1.1086113	0.33236088	4.59988989	0.45125002	0.26269785	-0.042055	0.98001941	0.98001941
ENSG00000166974	MAPRE2	0.00085451	0.00266663	-0.953133	0.2858394	3.043476	0.92806698	0.0503145	0.71754324	0.86885733	0.86885733
ENSG00000124491	F13A1	0.00085909	0.00267885	-0.9939001	0.29819823	1.01318294	0.94188228	0.04678544	0.71972979	0.95358911	0.95358911
ENSG00000285827		0.00086257	0.00268761	-1.295728	0.38888626	2.227115	1.99266057	0.47517771	1.22618822	0.95307666	1.22618822
ENSG00000050030	NEXMIF	0.00086301	0.00268831	-1.1370855	0.34128736	3.18640198	1.53469701	0.07239001	1.23797695	0.86029235	1.23797695
ENSG00000171502	COL24A1	0.00086313	0.00268831	-1.0274517	0.30838531	1.60188831	0.98019437	0.0991116	0.69322161	0.97078025	0.97078025
ENSG00000170921	TANC2	0.0008682	0.00270218	-1.0000109	0.3002962	4.32440387	0.9797031	0.07413801	0.72848677	0.94036231	0.94036231
ENSG00000130270	ATP8B3	0.00087033	0.00270811	-1.1942048	0.35868449	2.44256115	1.69476287	0.14405271	1.30331109	0.93702094	1.30331109
ENSG00000123485	HJURP	0.00087393	0.00271879	-1.0328364	0.31032391	1.58930236	1.11048415	0.11264365	0.81007386	0.97074181	0.97074181
ENSG00000127081	ZNF484	0.00087621	0.00272431	-1.0050142	0.30203052	3.71868922	1.20145329	0.03319674	0.99305569	0.867327	0.99305569
ENSG00000156030	MIDEAS	0.00088435	0.00274645	-1.0219504	0.30735834	4.92899264	1.19085087	0.04493045	0.96387813	1.0178475	1.0178475
ENSG00000278191	CARS1	0.00088973	0.00275888	-2.012515	0.60558493	2.61729604	4.8281066	0.39528718	3.73046025	0.91736167	3.73046025
ENSG00000165409	TSHR	0.00089986	0.00278708	-1.0948918	0.3297769	2.29103596	1.4313147	0.10841888	1.11505013	0.94904085	1.11505013
ENSG00000132294	EFR3A	0.00090204	0.00279332	-0.9777542	0.29455566	3.90884083	0.62136969	0.09024772	0.35640359	0.88583642	0.88583642
ENSG00000196912	ANKRD36B	0.00090597	0.00280332	-1.2109628	0.36494475	3.58871616	1.75254825	0.09828868	1.40003887	0.86160768	1.40003887
ENSG00000162944	RFTN2	0.00090812	0.00280943	-1.1130781	0.33551244	1.00646398	1.08502804	0.31317582	0.55024739	0.95322091	0.95322091
ENSG00000126001	CEP250	0.0009165	0.00283258	-0.9511858	0.28693557	3.82986766	0.97883052	0.04980295	0.7704128	0.87643229	0.87643229
ENSG00000120519	SLC10A7	0.00091709	0.00283283	-0.9485714	0.28616255	3.1423382	1.07720656	0.04736756	0.87388374	0.86229225	0.87388374
ENSG00000120278	PLEKHG1	0.00093416	0.00288114	-0.9993251	0.30194369	4.39702106	0.95492458	0.07469389	0.70299113	0.95096855	0.95096855
ENSG00000090889	KIF4A	0.0009448	0.00291174	-1.0343718	0.31283289	2.30984208	1.28632523	0.0808357	1.02013899	0.94777362	1.02013899
ENSG00000186704	DTX2P1	0.00094888	0.00292097	-1.0287082	0.3112337	3.46579716	1.2158259	0.23164698	0.79987924	0.85810021	0.85810021
ENSG00000068489	PRR11	0.00095113	0.00292621	-0.994514	0.30094871	1.89487479	0.88819549	0.05157278	0.66009325	0.96734113	0.96734113
ENSG00000267041	ZNF850	0.00096629	0.00296886	-1.4156914	0.42897613	3.51233423	2.41729556	0.27074769	1.79948318	0.85917152	1.79948318
ENSG00000268041	ERFL	0.00096917	0.00297661	-1.1273635	0.34169513	1.1356395	1.5335792	0.19962959	1.11387047	0.95965222	1.11387047
ENSG00000110427	KIAA1549L	0.00097815	0.00300131	-1.0798434	0.32754909	2.81589323	1.4088793	0.0611947	1.14579984	0.89256173	1.14579984
ENSG00000106080	FKBP14	0.00098371	0.00301664	-1.0136583	0.30762169	2.50024406	0.71710308	0.1335399	0.39662683	0.93106002	0.93106002
ENSG00000031003	FAM13B	0.00098629	0.00302342	-0.9190062	0.27895944	3.20779367	0.72349873	0.0159512	0.55620371	0.85950546	0.85950546
ENSG00000138356	AOX1	0.00099139	0.00303614	-1.0270842	0.31190305	0.78643099	1.27703628	0.12089921	0.97354033	0.93920583	0.97354033
ENSG00000125633	CCDC93	0.00099382	0.00304243	-0.9700298	0.29463844	2.58780632	0.69418362	0.05567258	0.46796636	0.92096029	0.92096029
ENSG00000123095	BHLHE41	0.00099508	0.00304548	-0.9754299	0.29631095	2.47205444	0.74249847	0.05369597	0.51705309	0.93405603	0.93405603
ENSG00000154016	GRAP	0.00100154	0.00306316	-1.1486183	0.34911412	2.40385569	1.59948353	0.08183944	1.28931806	0.94061079	1.28931806
ENSG00000116183	PAPPA2	0.00101531	0.00310292	-0.9915025	0.30171247	0.31378485	0.89651137	0.12663599	0.5946494	0.89745616	0.89745616
ENSG00000174839	DENND6A	0.00101673	0.0031055	-0.9659335	0.29396714	2.3557724	0.77256477	0.02766599	0.57724368	0.94452164	0.94452164
ENSG00000049167	ERCC8	0.00101723	0.00310644	-1.0348377	0.31495034	4.40740127	0.50452597	0.16340811	0.14210102	0.95252118	0.95252118
ENSG00000196369	SRGAP2B	0.00102251	0.00312068	-1.0190131	0.31027177	2.17137718	0.62675077	0.12676753	0.30937787	0.95625388	0.95625388
ENSG00000282183	GOLGA2P10	0.00102697	0.00313085	-1.6746265	0.51008542	2.42932323	3.41222563	0.19148525	2.73562004	0.93828934	2.73562004
ENSG00000133475	GGT2P	0.00102958	0.00313785	-1.2566193	0.38284522	1.9743331	1.92206797	0.19086267	1.458055	0.96494637	1.458055
ENSG00000181847	TIGIT	0.00102966	0.00313785	-1.0041415	0.30592664	1.52745711	1.20890855	0.08256483	0.95161151	0.97033517	0.97033517
ENSG00000155111	CDK19	0.00103282	0.0031461	-0.9430727	0.28739684	2.77020234	0.82441104	0.03103654	0.63507823	0.89817906	0.89817906
ENSG00000126804	ZBTB1	0.00104011	0.0031667	-0.939065	0.28634859	3.45983571	0.43945339	0.06446175	0.21152127	0.8579878	0.8579878
ENSG00000217128	FNIP1	0.00104083	0.00316831	-1.0753224	0.32791714	5.09789201	1.10032665	0.17523859	0.71977335	1.03446998	1.03446998
ENSG00000077254	USP33	0.00104481	0.0031798	-0.9976385	0.30432741	4.35043242	0.40506966	0.09782658	0.12117655	0.94409414	0.94409414
ENSG00000170946	DNAJC24	0.00104992	0.00319356	-0.9915539	0.30259858	2.77731225	0.64909113	0.13282085	0.33675865	0.89729556	0.89729556
ENSG00000233056	ERVH48-1	0.0010518	0.00319745	-1.1909648	0.36350994	1.89742762	1.7318301	0.15509426	1.33147485	0.96727403	1.33147485
ENSG00000074054	CLASP1	0.00105407	0.00320315	-1.0161778	0.31021859	4.08102923	1.26119754	0.01863647	1.06401371	0.90971806	1.06401371
ENSG00000053108	FSTL4	0.0010776	0.00326359	-1.1045393	0.33783739	2.47037379	1.49487422	0.18445247	1.09955614	0.93422985	1.09955614
ENSG00000256594		0.00107839	0.00326538	-0.9581723	0.2930878	3.03857945	1.12506119	0.03773139	0.92864879	0.86925526	0.92864879
ENSG00000197603	CPLANE1	0.00108159	0.00327444	-1.0454294	0.31986011	5.31407032	0.47852058	0.10166592	0.17311573	1.04932708	1.04932708
ENSG00000134376	CRB1	0.00109323	0.00330658	-1.0368514	0.31753007	2.50858551	1.30887519	0.20413904	0.91877824	0.93014608	0.93014608
ENSG00000164164	OTUD4	0.00111502	0.00336488	-0.9134941	0.28023248	3.79756686	0.83306085	0.01026652	0.67529874	0.87319869	0.87319869
ENSG00000163637	PRICKLE2	0.00111664	0.00336727	-1.0113288	0.31028454	4.43253753	1.25977553	0.07315213	1.00995845	0.95629287	1.00995845
ENSG00000283510	INO80D	0.00111942	0.00337438	-0.9485394	0.29108312	3.0763598	0.40086424	0.08685263	0.14640706	0.86635291	0.86635291
ENSG00000114933	INO80D	0.00111942	0.00337438	-0.9485394	0.29108312	3.0763598	0.40086424	0.08685263	0.14640706	0.86635291	0.86635291
ENSG00000127364	TAS2R4	0.00112236	0.00338199	-1.0764274	0.33040439	1.79247482	1.42825145	0.2059507	1.02217871	0.96949882	1.02217871
ENSG00000183813	CCR4	0.00113473	0.00341235	-1.2343884	0.37925201	2.3013489	1.88122421	0.19962737	1.41848362	0.94835042	1.41848362
ENSG00000104327	CALB1	0.0011354	0.00341298	-1.1138342	0.34223068	2.48795166	1.5318483	0.19240079	1.1252199	0.93238463	1.1252199
ENSG00000154162	CDH12	0.00113947	0.00342328	-1.1142997	0.34248047	2.20099785	1.53393756	0.12400128	1.19554353	0.95460503	1.19554353
ENSG00000198105	ZNF248	0.00114232	0.00343122	-0.9523181	0.29275938	2.85197023	1.06902623	0.07595919	0.83558929	0.88825644	0.88825644
ENSG00000173273	TNKS	0.00114469	0.00343705	-0.9762783	0.30017943	2.92523716	0.39436024	0.13368377	0.08260349	0.88002771	0.88002771
ENSG00000196705	ZNF431	0.00114837	0.00344555	-0.9794532	0.30124026	2.86707348	1.18650869	0.0828466	0.93804249	0.88649794	0.93804249
ENSG00000288424	AGAP12P	0.0011516	0.00345266	-1.1360824	0.34949887	1.70574355	1.59699503	0.11207771	1.26210369	0.97051854	1.26210369
ENSG00000113658	SMAD5	0.00115123	0.00345266	-0.9297409	0.28601295	2.77025539	0.8363575	0.02211586	0.66099428	0.89817246	0.89817246
ENSG00000265018	AGAP12P	0.0011516	0.00345266	-1.1360824	0.34949887	1.70574355	1.59699503	0.11207771	1.26210369	0.97051854	1.26210369
ENSG00000274047	SYNRG	0.00115213	0.00345332	-1.0566174	0.3250657	4.11211123	1.38149374	0.13625052	1.05251117	0.91392159	1.05251117
ENSG00000182264	IZUMO1	0.00115227	0.00345332	-1.0389004	0.31961848	1.33221283	1.16070017	0.18253049	0.78883205	0.9667242	0.9667242
ENSG00000215156		0.00116324	0.00348044	-1.3241934	0.40772724	2.40452952	2.17286992	0.18385795	1.68635898	0.94055147	1.68635898
ENSG00000139926	FRMD6	0.0011626	0.00348044	-0.9938331	0.30599254	1.55793923	1.02779492	0.08277294	0.77116203	0.97058068	0.97058068
ENSG00000206530	CFAP44	0.0011672	0.00349099	-0.9719249	0.29935079	4.40332805	1.01344362	0.0562112	0.79147839	0.95191138	0.95191138
ENSG00000068305	MEF2A	0.00116749	0.00349121	-1.0984336	0.33832256	5.13256044	0.43611747	0.25049365	-0.0408872	1.0372056	1.0372056
ENSG00000005889	ZFX	0.00117209	0.00350432	-0.9255256	0.28516445	3.03683912	0.67465462	0.04543788	0.47469832	0.8693982	0.8693982
ENSG00000154310	TNIK	0.00117455	0.00351035	-1.1374814	0.35053462	3.70565172	1.60562027	0.13119036	1.25114802	0.86667021	1.25114802
ENSG00000285182	FNBP4	0.00117997	0.00352264	-0.9581155	0.29537936	3.49174343	0.32575093	0.12289478	0.03041503	0.85865608	0.85865608
ENSG00000109920	FNBP4	0.00117997	0.00352264	-0.9581155	0.29537936	3.49174343	0.32575093	0.12289478	0.03041503	0.85865608	0.85865608
ENSG00000253923		0.00118076	0.00352434	-1.1947311	0.36834762	1.10300729	1.77269884	0.19723707	1.32916258	0.95815784	1.32916258
ENSG00000112742	TTK	0.00118329	0.00353124	-1.0034734	0.30943914	1.24189447	0.81025891	0.11332474	0.51558886	0.96389181	0.96389181
ENSG00000198569	SLC34A3	0.00118354	0.00353133	-1.3748031	0.42395337	2.09531954	2.34816074	0.13926981	1.88276541	0.96007696	1.88276541
ENSG00000005156	LIG3	0.00119466	0.00356057	-1.0031299	0.30959357	4.07282669	0.48836675	0.16970705	0.13189821	0.90858497	0.90858497
ENSG00000203414	BTBD7P1	0.00119986	0.00357472	-1.0688436	0.3300006	1.43847993	1.22149548	0.25600663	0.76495773	0.96912279	0.96912279
ENSG00000253305	PCDHGB6	0.00121523	0.00361584	-1.0631106	0.32859907	2.30462206	1.40966134	0.24156847	0.97317673	0.94812901	0.97317673
ENSG00000099725	PRKY	0.00125326	0.00371659	-1.3918683	0.43139009	2.12626066	2.42751112	0.19656803	1.89702787	0.95859292	1.89702787
ENSG00000165072	MAMDC2	0.00126036	0.00373635	-1.1076098	0.34346033	1.4303108	1.53853655	0.13600465	1.19110161	0.96897483	1.19110161
ENSG00000123338	NCKAP1L	0.00126524	0.00374735	-1.1236729	0.34856088	3.40618127	1.58440663	0.02455912	1.34225608	0.85724862	1.34225608
ENSG00000181192	DHTKD1	0.00126939	0.00375825	-0.975979	0.30283453	3.4216309	0.64966452	0.17431377	0.30179294	0.85740971	0.85740971
ENSG00000135426	TESPA1	0.0012702	0.00375996	-0.9966884	0.30927798	2.01570449	1.24727302	0.09362462	0.98247012	0.96344804	0.98247012
ENSG00000106415	GLCCI1	0.00127665	0.00377627	-0.9143841	0.28386631	2.84661761	0.80665248	0.01763961	0.64074643	0.8888863	0.8888863
ENSG00000167723	TRPV3	0.00127901	0.00378257	-0.9970518	0.30958105	2.49517861	1.24948547	0.13308226	0.94512255	0.93160914	0.94512255
ENSG00000187792	ZNF70	0.00129064	0.00381486	-0.9558622	0.29703116	3.66388518	1.14995369	0.03175031	0.96080919	0.86470313	0.96080919
ENSG00000174442	ZWILCH	0.00129854	0.0038347	-0.9551788	0.29698042	2.41270627	0.85652855	0.05239801	0.64193064	0.93982241	0.93982241
ENSG00000133858	ZFC3H1	0.00132376	0.00390489	-0.9799393	0.30520307	3.61272131	0.51683513	0.18539753	0.15408715	0.86252776	0.86252776
ENSG00000072657	TRHDE	0.00132572	0.00390994	-1.0021864	0.31217319	1.02019508	1.04899789	0.14236666	0.7299028	0.95396949	0.95396949
ENSG00000180357	ZNF609	0.00133241	0.00392682	-1.0550433	0.32878607	4.61197118	1.40776255	0.0079185	1.20820963	0.98151315	1.20820963
ENSG00000129993	CBFA2T3	0.0013562	0.0039889	-1.0390752	0.3243245	1.7087933	1.36916071	0.05482724	1.12851952	0.97049513	1.12851952
ENSG00000177272	KCNA3	0.00136143	0.00400283	-1.242529	0.38796232	2.68630537	1.95897482	0.0687994	1.62449171	0.90873329	1.62449171
ENSG00000157399	ARSL	0.00137048	0.00402575	-1.0607497	0.33140172	2.02810508	1.42916221	0.18318142	1.05237348	0.96296524	1.05237348
ENSG00000214652	ZNF727	0.00137458	0.00403633	-1.1410648	0.35658991	2.66456899	1.65453136	0.09580205	1.33470703	0.91147123	1.33470703
ENSG00000196792	STRN3	0.00138098	0.00405142	-0.8912953	0.27865192	3.27803848	0.93133535	0.01581324	0.77749199	0.85771428	0.85771428
ENSG00000159917	ZNF235	0.00138767	0.00406883	-0.9884047	0.30914663	2.31253017	1.20547393	0.12759141	0.90917314	0.94758952	0.94758952
ENSG00000150175	FRMPD2B	0.00139271	0.0040814	-1.5084118	0.47194551	2.55856466	2.89712191	0.2914814	2.21425995	0.92444504	2.21425995
ENSG00000169855	ROBO1	0.00139823	0.00409532	-1.0199642	0.31923598	3.96661452	1.32544078	0.04286401	1.10364164	0.89363264	1.10364164
ENSG00000130584	ZBTB46	0.00139979	0.00409765	-0.9356477	0.29287543	2.94421844	1.06175277	0.08694305	0.82331128	0.87803713	0.87803713
ENSG00000240694	PNMA2	0.00140229	0.0041035	-0.9629424	0.30146795	0.6107715	0.71433896	0.0969991	0.44979996	0.92543383	0.92543383
ENSG00000215878	MARCKSL1P2	0.00140798	0.00411715	-1.1019855	0.34512439	1.64604223	1.54883919	0.18547153	1.15452546	0.97079563	1.15452546
ENSG00000121210	TMEM131L	0.0014105	0.00412228	-0.9291534	0.29104323	3.22168079	0.42375198	0.09388766	0.16971489	0.85905663	0.85905663
ENSG00000215146		0.00142932	0.00416972	-1.1672614	0.36606604	1.37890602	1.74179575	0.16608606	1.34146279	0.96790401	1.34146279
ENSG00000007545	CRAMP1	0.00144023	0.0041985	-0.9697201	0.30432477	2.09912392	0.602825	0.08200286	0.34881882	0.95989975	0.95989975
ENSG00000275111	ZNF2	0.0014456	0.00421188	-1.0001386	0.31397708	3.54975972	0.702647	0.24877641	0.27196591	0.86026669	0.86026669
ENSG00000171791	BCL2	0.00144801	0.00421736	-1.1071268	0.34761674	4.40383218	1.57009937	0.02016006	1.33926067	0.95198682	1.33926067
ENSG00000161048	NAPEPLD	0.00146328	0.0042557	-0.9482207	0.29800755	3.2020447	0.66191107	0.13939015	0.35953441	0.85970545	0.85970545
ENSG00000068650	ATP11A	0.00146439	0.00425814	-0.9146735	0.28748402	3.23581778	1.03670961	0.0711308	0.82117619	0.85864867	0.85864867
ENSG00000106799	TGFBR1	0.00147685	0.00428973	-0.9075318	0.28545963	3.91643589	0.77235154	0.02990318	0.59601206	0.88682786	0.88682786
ENSG00000134987	WDR36	0.0014886	0.00432152	-0.8860095	0.27889147	3.19240774	0.85396978	0.01497052	0.70145746	0.86005957	0.86005957
ENSG00000196119	OR8A1	0.00149141	0.00432813	-0.9874904	0.31088847	1.12668709	0.93659472	0.12807982	0.63552007	0.95925113	0.95925113
ENSG00000168675	LDLRAD4	0.00149392	0.00433307	-1.0235212	0.32228143	5.12776021	0.42774777	0.13164064	0.10028467	1.03684419	1.03684419
ENSG00000112473	SLC39A7	0.0014985	0.00434479	-0.9790246	0.30835675	3.91127865	1.17626953	0.18354037	0.82709584	0.88615331	0.88615331
ENSG00000092054	MYH7	0.00150074	0.00435051	-1.2849919	0.40478053	2.32233355	2.12688809	0.12431835	1.71896356	0.94691181	1.71896356
ENSG00000154096	THY1	0.00150389	0.00435808	-0.9605856	0.30264856	0.73994281	0.90724424	0.09468085	0.64922874	0.93577587	0.93577587
ENSG00000157107	FCHO2	0.00150521	0.0043611	-0.9201552	0.28993342	3.19195189	0.69311621	0.08561371	0.45522497	0.86007691	0.86007691
ENSG00000196693	ZNF33B	0.00151511	0.00438743	-0.8922152	0.28129855	3.50250329	0.9930819	0.0312824	0.82451573	0.85891744	0.85891744
ENSG00000254752	OR5M2P	0.00151902	0.00439797	-0.9953515	0.3138896	1.19566107	1.19289212	0.14625916	0.87503364	0.96216601	0.96216601
ENSG00000006634	DBF4	0.00152238	0.00440372	-0.9391462	0.29622482	3.37814655	0.81302215	0.13010907	0.52585397	0.85706876	0.85706876
ENSG00000143437	ARNT	0.00152216	0.00440372	-0.9147849	0.28853705	3.27117432	0.6484636	0.07876541	0.41856215	0.85783793	0.85783793
ENSG00000205238	SPDYE2	0.00152227	0.00440372	-1.3735384	0.43323754	1.89168251	2.43551142	0.38128176	1.73028437	0.96742413	1.73028437
ENSG00000163904	SENP2	0.00152959	0.00442061	-0.9181766	0.28973609	3.48490716	0.31037231	0.08590446	0.0662968	0.85849929	0.85849929
ENSG00000168806	LCMT2	0.00153204	0.00442609	-1.0575237	0.33375679	4.77825913	0.47675718	0.25264371	0.01541085	1.00053421	1.00053421
ENSG00000100523	DDHD1	0.00153462	0.00443276	-0.8973894	0.2832618	3.85905742	0.84856604	0.02297999	0.68401456	0.87968902	0.87968902
ENSG00000175265	GOLGA8A	0.00154044	0.00444879	-1.0181036	0.32147717	5.31623357	1.01657066	0.11320523	0.71984049	1.04945496	1.04945496
ENSG00000169594	BNC1	0.00156001	0.00449885	-1.2357285	0.39064755	2.04896092	1.97888349	0.15007753	1.56673446	0.96211812	1.56673446
ENSG00000233579	KRT8P15	0.00156071	0.00450006	-1.2567843	0.39732028	1.56793511	2.04703943	0.17744741	1.59851593	0.97064214	1.59851593
ENSG00000152127	MGAT5	0.00156949	0.00452215	-0.9605311	0.30381963	4.0419689	0.47593308	0.13418357	0.1709988	0.9042631	0.9042631
ENSG00000092853	CLSPN	0.00157069	0.00452413	-0.963831	0.30488481	2.91666588	1.12630518	0.16479334	0.80074271	0.88094758	0.88094758
ENSG00000151292	CSNK1G3	0.00157368	0.00453179	-1.0686362	0.3380967	4.55808765	1.48193533	0.01351605	1.27246448	0.97454184	1.27246448
ENSG00000128815	WDFY4	0.00157538	0.00453587	-1.226726	0.38815202	4.11240559	1.95316245	0.20200756	1.4929398	0.91396059	1.4929398
ENSG00000188827	SLX4	0.00157614	0.00453725	-0.9031264	0.28577361	3.59083302	1.05870078	0.02371813	0.89503062	0.86168605	0.89503062
ENSG00000198633	ZNF534	0.0015773	0.00453978	-0.9772074	0.30923578	1.13244397	0.88214613	0.11629132	0.59583991	0.95950982	0.95950982
ENSG00000124227	ANKRD60	0.0015814	0.00454912	-1.0487544	0.33195608	1.26783728	1.24963733	0.27491307	0.78292982	0.96477888	0.96477888
ENSG00000079308	TNS1	0.00159548	0.00458555	-0.9310836	0.29495181	4.22181684	1.12219714	0.05169443	0.92169898	0.92701696	0.92701696
ENSG00000133624	ZNF767P	0.00159602	0.00458628	-0.9601778	0.3041778	3.52445301	1.19904808	0.03853577	1.00236072	0.85950434	1.00236072
ENSG00000164219	PGGT1B	0.00159708	0.0045885	-0.9042558	0.28647961	2.78796168	0.85250902	0.0273159	0.68129012	0.895978	0.895978
ENSG00000066294	CD84	0.00160209	0.00460207	-1.0359921	0.32831039	2.62701323	1.39670983	0.0551659	1.15744587	0.91616107	1.15744587
ENSG00000125245	GPR18	0.00160992	0.00462128	-1.3727382	0.43522296	2.80796322	2.45416151	0.10038768	2.03057636	0.89352519	2.03057636
ENSG00000182613	OR2V2	0.00161452	0.00463282	-1.0774809	0.34170253	1.7480689	1.51266378	0.21643256	1.09712443	0.97011277	1.09712443
ENSG00000285005	PLEKHM3	0.00161753	0.00463982	-0.969474	0.30750334	3.0611533	0.61996172	0.19630699	0.25203946	0.86747393	0.86747393
ENSG00000178385	PLEKHM3	0.00161753	0.00463982	-0.969474	0.30750334	3.0611533	0.61996172	0.19630699	0.25203946	0.86747393	0.86747393
ENSG00000159023	EPB41	0.00162282	0.00465417	-1.1751845	0.37286454	5.11508239	1.80089249	0.01582685	1.54823777	1.03586235	1.54823777
ENSG00000073861	TBX21	0.00162908	0.0046713	-1.1743135	0.3727212	2.5868211	1.79932035	0.30243158	1.26043072	0.92107918	1.26043072
ENSG00000012817	KDM5D	0.00164045	0.00469887	-1.9310544	0.61330242	3.43757751	4.87088452	0.19518566	4.0363878	0.85762051	4.0363878
ENSG00000119509	INVS	0.00164249	0.00470387	-0.9199316	0.29220369	2.47512135	0.72762977	0.02682134	0.54920575	0.93373739	0.93373739
ENSG00000130749	ZC3H4	0.00166245	0.00475512	-1.0758285	0.34210608	5.11234002	0.88708418	0.28101654	0.39686516	1.03564486	1.03564486
ENSG00000074755	ZZEF1	0.00167324	0.00478513	-0.9513224	0.30269623	4.76147069	0.99330732	0.03220445	0.80268729	0.99857686	0.99857686
ENSG00000115904	SOS1	0.00167388	0.00478612	-1.1001029	0.35004842	5.34963636	0.36812199	0.32712855	-0.1874018	1.05137782	1.05137782
ENSG00000135999	EPC2	0.00167884	0.00479775	-0.8976878	0.28571949	3.21731108	0.57634251	0.05920813	0.37076548	0.85919267	0.85919267
ENSG00000254536		0.00169117	0.00482784	-1.1021694	0.35104208	2.73884925	1.50623565	0.48423959	0.81234072	0.90210403	0.90210403
ENSG00000159164	SV2A	0.00169507	0.0048364	-1.0794515	0.34388035	1.94528233	1.52998667	0.13838461	1.19196948	0.96589539	1.19196948
ENSG00000268964	ERVV-2	0.00169832	0.00484396	-1.1010841	0.35083455	1.59111194	1.5924107	0.19921134	1.1854936	0.97074826	1.1854936
ENSG00000145868	FBXO38	0.00170145	0.00485204	-0.909296	0.28977567	3.67314798	0.41270384	0.07953629	0.17990873	0.86512555	0.86512555
ENSG00000147117	ZNF157	0.00170484	0.00485997	-1.0863695	0.34627	2.41405087	1.55108277	0.11855748	1.23035025	0.93970089	1.23035025
ENSG00000187098	MITF	0.00171922	0.00489493	-0.9640306	0.30751719	3.69585052	0.6788902	0.19768216	0.31265023	0.8661946	0.8661946
ENSG00000196074	SYCP2	0.00171984	0.00489582	-0.9714804	0.30990401	1.65929567	0.94511904	0.10969174	0.66866282	0.9707638	0.9707638
ENSG00000274497	IGHG2	0.0017263	0.00491161	-2.2762689	0.72638885	2.48377047	6.82332786	0.15619918	5.77975932	0.93282891	5.77975932
ENSG00000137801	THBS1	0.00172807	0.0049149	-0.9425491	0.30080927	2.652092	0.88702372	0.1049334	0.62506511	0.91303654	0.91303654
ENSG00000040199	PHLPP2	0.00172892	0.00491645	-0.8830481	0.28183284	3.35787123	0.93305812	0.03655209	0.76134397	0.85703256	0.85703256
ENSG00000159958	TNFRSF13C	0.0017371	0.00493884	-1.3622984	0.43498226	3.24633407	2.44640057	0.08996967	2.03863798	0.85837662	2.03863798
ENSG00000162753	SLC9C2	0.00174631	0.00496153	-1.0314118	0.32949354	2.4436034	1.12090134	0.28444803	0.64943667	0.93691937	0.93691937
ENSG00000196220	SRGAP3	0.00174834	0.00496553	-0.981963	0.31373082	4.73915882	0.91229469	0.11131783	0.62967455	0.9959862	0.9959862
ENSG00000239388	ASB14	0.00175057	0.00497101	-1.4476079	0.46255685	2.84458368	2.76581845	0.15712404	2.24991287	0.88912651	2.24991287
ENSG00000165934	CPSF2	0.00175526	0.00498168	-0.8973738	0.28681148	3.3680859	1.06329807	0.02442395	0.90101033	0.85704073	0.90101033
ENSG00000269226	TMSB15B	0.00175647	0.0049832	-1.0622315	0.33952408	1.88212499	1.39764948	0.32919517	0.87369347	0.96766656	0.96766656
ENSG00000171466	ZNF562	0.00176389	0.00500176	-0.8807511	0.28162838	3.54617066	0.73273288	0.03213544	0.56276735	0.86015318	0.86015318
ENSG00000243696		0.00176544	0.0050053	-0.9531009	0.30478821	0.7401395	0.82168658	0.10928763	0.55036745	0.93579071	0.93579071
ENSG00000011426	ANLN	0.00177117	0.00501713	-1.0393506	0.33247089	2.09936739	1.42844294	0.07955179	1.16398828	0.95988836	1.16398828
ENSG00000133789	SWAP70	0.00177239	0.0050197	-0.9510367	0.30424046	4.50010708	0.38620423	0.07498751	0.14243926	0.96633791	0.96633791
ENSG00000169914	OTUD3	0.00177354	0.0050212	-0.9346655	0.29902152	1.20486679	0.60904327	0.04338166	0.40671416	0.96252435	0.96252435
ENSG00000100473	COCH	0.00177616	0.00502633	-1.1594932	0.3710007	2.54213771	1.77857401	0.11518254	1.43328454	0.926358	1.43328454
ENSG00000153560	UBP1	0.00177852	0.00503087	-0.9543321	0.30539388	4.24465719	0.65755168	0.11948548	0.37274924	0.92975054	0.92975054
ENSG00000206262	FOXL2NB	0.00178027	0.00503494	-0.9578777	0.30655689	1.58751566	1.18328645	0.08650754	0.93921129	0.97073513	0.97073513
ENSG00000283526	PRRT1B	0.00179781	0.0050783	-1.2430151	0.39817923	1.68253997	2.048033	0.14212591	1.64152448	0.97066713	1.64152448
ENSG00000101003	GINS1	0.00179949	0.00508037	-0.9804721	0.31410563	3.3513016	1.27444229	0.13734541	0.972606	0.85703828	0.972606
ENSG00000198934	MAGEE1	0.00180346	0.00508981	-0.9436058	0.30235797	2.85609366	1.02111922	0.1407053	0.72531411	0.88777354	0.88777354
ENSG00000213212	NCLP1	0.00180771	0.00509803	-1.070966	0.34324405	1.52982467	1.52167194	0.19704042	1.12839499	0.97035737	1.12839499
ENSG00000287067		0.00181318	0.00511097	-0.9834615	0.31528882	2.6341445	1.28379752	0.15404551	0.96428368	0.91527609	0.96428368
ENSG00000130559	CAMSAP1	0.00182528	0.00513797	-0.8894623	0.2853328	3.53095484	0.36066704	0.05622496	0.15720596	0.85969164	0.85969164
ENSG00000103365	GGA2	0.00182531	0.00513797	-0.9064758	0.29079111	4.02065679	0.70002083	0.0500471	0.50266189	0.90124691	0.90124691
ENSG00000080345	RIF1	0.00182515	0.00513797	-0.9301814	0.29839317	4.24024867	0.97342086	0.07247236	0.74990539	0.92921057	0.92921057
ENSG00000165259	HDX	0.00183444	0.00516097	-1.0678916	0.34273389	2.53398831	1.51654778	0.15719972	1.16429862	0.92729353	1.16429862
ENSG00000244480		0.00183428	0.00516097	-1.0861369	0.34858663	1.47977726	1.56878897	0.20467051	1.1623467	0.96977679	1.1623467
ENSG00000139351	SYCP3	0.00184681	0.00519172	-1.0216223	0.32809279	1.14573211	1.28870545	0.25090858	0.85757179	0.96009629	0.96009629
ENSG00000170442	KRT86	0.00185516	0.00521199	-1.2103169	0.38885811	1.86422648	1.95160493	0.18630541	1.51481419	0.96809606	1.51481419
ENSG00000169621	APLF	0.00185693	0.00521514	-0.918764	0.29521288	3.06567987	1.12478355	0.09423604	0.88620873	0.86713343	0.88620873
ENSG00000206489	PPP1R10	0.00187265	0.00525562	-0.9751706	0.313588	2.13140316	1.23468315	0.14795935	0.92355842	0.95833681	0.95833681
ENSG00000055917	PUM2	0.00187403	0.00525857	-0.9250543	0.2974927	4.01450823	0.32400707	0.09527105	0.06834113	0.90037539	0.90037539
ENSG00000134061	CD180	0.00188208	0.0052775	-1.290882	0.41531028	2.94332182	2.22528216	0.06759092	1.87283863	0.87812967	1.87283863
ENSG00000123124	WWP1	0.00188731	0.00529031	-0.865202	0.2784314	3.51519891	0.98497785	0.01289724	0.84386535	0.85924826	0.85924826
ENSG00000113580	NR3C1	0.00191796	0.00536874	-1.0344917	0.33342185	5.18052306	0.46134865	0.20999483	0.05173143	1.04066913	1.04066913
ENSG00000165757	JCAD	0.00192583	0.0053888	-0.94072	0.30331728	0.51892772	1.04607519	0.1176317	0.77482869	0.91738374	0.91738374
ENSG00000126216	TUBGCP3	0.00193152	0.00540108	-1.0627364	0.34275573	3.51882301	1.514619	0.05253045	1.26913632	0.85934707	1.26913632
ENSG00000156172	CFAP418	0.00195186	0.00545039	-0.9597411	0.30984766	3.39644526	0.74286553	0.22289324	0.35411809	0.85716947	0.85716947
ENSG00000132915	PDE6A	0.00197564	0.00550915	-0.9162683	0.29615601	2.96242493	1.11255292	0.1105274	0.85836417	0.87619187	0.87619187
ENSG00000100346	CACNA1I	0.00197742	0.00551223	-1.2089217	0.39078122	2.28530561	1.96754288	0.0854234	1.63256364	0.94941976	1.63256364
ENSG00000141469	SLC14A1	0.00198211	0.00551765	-1.0286242	0.33257595	2.49524255	1.29997732	0.31272384	0.80443823	0.93160224	0.93160224
ENSG00000053702	NRIP2	0.00198829	0.00553199	-0.9264518	0.29963098	0.79557546	0.63107964	0.07014879	0.40532844	0.93986182	0.93986182
ENSG00000092140	G2E3	0.00199011	0.00553527	-0.9010557	0.29144304	2.77322893	0.83467661	0.05776167	0.63382503	0.89780261	0.89780261
ENSG00000116095	PLEKHA3	0.00200111	0.00556479	-0.9107831	0.29474542	2.80666364	0.6589595	0.08365862	0.42576283	0.8936836	0.8936836
ENSG00000174130	TLR6	0.00200246	0.00556756	-0.9600155	0.31069794	3.98253181	0.82680098	0.19014063	0.47215114	0.89585797	0.89585797
ENSG00000188906	LRRK2	0.00201961	0.00561235	-1.2087663	0.39152441	4.57586291	1.97390119	0.11617834	1.60834952	0.97692514	1.60834952
ENSG00000146350	TBC1D32	0.00202605	0.00562832	-0.9486676	0.30737162	3.4654376	1.21645948	0.15771696	0.90515278	0.85809326	0.90515278
ENSG00000080007	DDX43	0.00204009	0.00566534	-0.9417342	0.30532824	0.55699985	0.98197298	0.12799605	0.69888659	0.92078896	0.92078896
ENSG00000285733		0.00204782	0.00568388	-1.1440898	0.37107125	2.49882847	1.7723872	0.21209628	1.33695979	0.93121393	1.33695979
ENSG00000108064	TFAM	0.00205758	0.005709	-0.8892731	0.28855706	3.77704279	0.71107158	0.06535893	0.50458329	0.87137433	0.87137433
ENSG00000159753	CARMIL2	0.00208424	0.00577818	-1.1689158	0.37976985	2.84125443	1.85556779	0.11678058	1.50575226	0.88952071	1.50575226
ENSG00000131378	RFTN1	0.00210234	0.00582117	-0.911424	0.29636136	2.99144751	1.1297359	0.01775532	0.97033283	0.87339146	0.97033283
ENSG00000078747	ITCH	0.00210274	0.00582127	-1.0140664	0.32974293	5.37839907	0.8778718	0.17026226	0.52328455	1.05295473	1.05295473
ENSG00000197380	DACT3	0.00211422	0.00585204	-1.1039037	0.35914486	2.30486304	1.6588478	0.14844726	1.30263433	0.94811266	1.30263433
ENSG00000136205	TNS3	0.00214062	0.00591598	-0.8848964	0.28824029	3.06693287	0.81399361	0.06763755	0.60850736	0.86704018	0.86704018
ENSG00000281813	KAT6B	0.00214259	0.00591939	-0.9185542	0.29923052	4.14514902	0.81306682	0.08913378	0.57429461	0.91817889	0.91817889
ENSG00000156650	KAT6B	0.00214259	0.00591939	-0.9185542	0.29923052	4.14514902	0.81306682	0.08913378	0.57429461	0.91817889	0.91817889
ENSG00000277531	PNMA8C	0.00215035	0.00593983	-0.9961528	0.32462352	1.88404239	1.35464974	0.18195297	1.00357687	0.96761865	1.00357687
ENSG00000205339	IPO7	0.00216352	0.00597107	-0.8569654	0.2794316	3.17394078	0.85642033	0.01761736	0.71112256	0.86080535	0.86080535
ENSG00000176826	FKBP9P1	0.00216817	0.00598187	-0.9550215	0.31147008	2.79774705	1.21429961	0.19662896	0.86169749	0.89477418	0.89477418
ENSG00000165025	SYK	0.00217713	0.00600452	-1.0318093	0.33664898	5.62067853	1.45638258	0.01578953	1.25920149	1.06317675	1.25920149
ENSG00000129675	ARHGEF6	0.00217817	0.00600593	-0.9936392	0.32421036	5.20810446	0.43085682	0.1399364	0.10684317	1.04257765	1.04257765
ENSG00000198046	ZNF667	0.00218992	0.00603567	-1.0412876	0.33993583	2.91126904	1.48472338	0.07826057	1.2217486	0.88153315	1.2217486
ENSG00000285799		0.00220735	0.00607955	-1.0058191	0.32861145	2.19621979	1.38714981	0.19757039	1.0172663	0.95487708	1.0172663
ENSG00000077458	FAM76B	0.00222011	0.00611052	-0.8636323	0.28231684	3.05257827	1.02150984	0.02852201	0.86592879	0.86813445	0.86813445
ENSG00000180884	ZNF792	0.00222567	0.00611851	-1.0152313	0.33195509	2.93858362	1.41520368	0.05492171	1.18476281	0.87862117	1.18476281
ENSG00000146263	MMS22L	0.00222565	0.00611851	-0.8972446	0.29337609	3.38940322	0.85821969	0.11115902	0.60570601	0.85712322	0.85712322
ENSG00000216775		0.00222467	0.00611851	-0.9252182	0.30250972	4.24525312	0.99110748	0.09968748	0.74246801	0.92982397	0.92982397
ENSG00000186814	ZSCAN30	0.00224098	0.00615744	-0.8854003	0.28969818	3.33757899	0.73924662	0.08707825	0.51285788	0.85707843	0.85707843
ENSG00000228432	DHFRP2	0.00224839	0.0061757	-0.9652245	0.31591856	3.32266426	1.28141726	0.15180622	0.97099485	0.85716617	0.97099485
ENSG00000186409	CCDC30	0.0022554	0.00618985	-0.9538048	0.31227634	5.91459423	0.66524335	0.02941095	0.47084322	1.06764981	1.06764981
ENSG00000108854	SMURF2	0.00228229	0.00625921	-0.9535297	0.31255024	4.31455707	1.25372721	0.02356922	1.07541686	0.93897855	1.07541686
ENSG00000185811	IKZF1	0.00230542	0.00631833	-1.2762091	0.41873455	4.25772292	2.24968534	0.03108946	1.94147002	0.93138346	1.94147002
ENSG00000160219	GAB3	0.00231354	0.00633737	-1.254475	0.41174625	3.93458389	2.17501321	0.13153843	1.77573003	0.88924279	1.77573003
ENSG00000120324	PCDHB10	0.00231951	0.00635067	-1.1768439	0.38636419	1.40344544	1.9149872	0.17970672	1.49966274	0.96844519	1.49966274
ENSG00000111880	RNGTT	0.00232137	0.00635449	-0.8489733	0.27874465	3.44126747	0.93364352	0.01643341	0.79350566	0.85767558	0.85767558
ENSG00000144724	PTPRG	0.00233137	0.00637861	-0.9606527	0.3155464	2.89779193	1.27713936	0.05059227	1.06956494	0.88301611	1.06956494
ENSG00000077232	DNAJC10	0.00233664	0.00639086	-0.9356748	0.30741047	7.39582442	0.48218862	0.09287294	0.22781492	0.97026552	0.97026552
ENSG00000166750	SLFN5	0.00234476	0.00640872	-0.9398864	0.3089001	5.59415528	1.17211916	0.01113101	1.00985061	1.06233578	1.06233578
ENSG00000089775	ZBTB25	0.00234451	0.00640872	-0.8624263	0.28343932	3.53284233	0.9985718	0.04405367	0.82746738	0.85974714	0.85974714
ENSG00000168685	IL7R	0.00235231	0.00642827	-0.9808764	0.32247432	2.66872418	1.33351024	0.04180854	1.12807546	0.91094875	1.12807546
ENSG00000182040	USH1G	0.00235499	0.00643342	-1.015031	0.33374069	1.35882399	1.42827202	0.16334495	1.08971211	0.96742061	1.08971211
ENSG00000096996	IL12RB1	0.00235705	0.00643795	-0.9216378	0.30305938	2.52669978	0.97539165	0.10513399	0.72231729	0.92812213	0.92812213
ENSG00000143147	GPR161	0.00237893	0.00648781	-0.986934	0.32482777	2.69068417	1.07859252	0.2788415	0.62941752	0.90818066	0.90818066
ENSG00000148606	POLR3A	0.00238668	0.00650674	-0.9497416	0.31268756	5.47983486	1.21068874	0.04203645	1.01456757	1.05791553	1.05791553
ENSG00000172817	CYP7B1	0.00238881	0.00651144	-1.1873195	0.39094091	2.75976665	1.95905317	0.19654226	1.52284914	0.89948074	1.52284914
ENSG00000275949		0.00238976	0.00651185	-0.9934173	0.32710901	1.24336779	0.97279485	0.23980963	0.55833728	0.96394376	0.96394376
ENSG00000118058	KMT2A	0.00240033	0.00653732	-0.9685846	0.31907194	5.25911556	0.98868028	0.0993835	0.72437306	1.04594414	1.04594414
ENSG00000196600	SLC22A25	0.00240437	0.0065461	-0.9045106	0.29801436	3.30003339	1.13820781	0.0242353	0.97490596	0.85738955	0.97490596
ENSG00000106571	GLI3	0.00241658	0.00657713	-0.8744576	0.28825775	3.08555061	0.9467642	0.06908352	0.74568342	0.86570748	0.86570748
ENSG00000203326	ZNF525	0.00242417	0.00659446	-0.9677341	0.3191052	2.5313988	0.61811605	0.21797765	0.22914508	0.92758882	0.92758882
ENSG00000065183	WDR3	0.00242987	0.00660773	-0.8644173	0.28510369	2.75263742	0.76345938	0.01407336	0.61761471	0.90037294	0.90037294
ENSG00000180530	NRIP1	0.00245454	0.00666918	-0.8883035	0.2932769	2.34226247	0.74607649	0.02212388	0.58376108	0.9455037	0.9455037
ENSG00000139793	MBNL2	0.00246366	0.00669169	-1.0213195	0.33731742	5.5191012	0.32414886	0.22048223	-0.0930688	1.05957701	1.05957701
ENSG00000150764	DIXDC1	0.00246919	0.00670559	-0.9470043	0.31284295	3.76259958	1.25338701	0.015836	1.08520951	0.87020853	1.08520951
ENSG00000159459	UBR1	0.00248296	0.00673845	-0.9121943	0.30151094	3.21515139	1.16405305	0.10818714	0.91453738	0.85926166	0.91453738
ENSG00000123094	RASSF8	0.00248753	0.00674859	-0.9007984	0.29779898	2.58198207	1.07763574	0.0760359	0.86278884	0.9216617	0.9216617
ENSG00000171817	ZNF540	0.00250876	0.00679587	-0.9486887	0.31389802	2.82317032	1.26130891	0.10650211	1.00198254	0.89168261	1.00198254
ENSG00000215883	CYB5RL	0.0025125	0.00680258	-0.9278397	0.30704542	3.85055228	0.6637274	0.18190477	0.32628392	0.87871027	0.87871027
ENSG00000144810	COL8A1	0.00251908	0.0068158	-1.0943874	0.36225512	2.2729649	1.67967313	0.15213621	1.32418746	0.95022433	1.32418746
ENSG00000176406	RIMS2	0.00252433	0.00682659	-1.1888199	0.39359565	2.91438804	1.98276668	0.22101176	1.52181048	0.88119414	1.52181048
ENSG00000174384	PMS2P6	0.00255135	0.0068927	-1.0992217	0.36432038	3.53522915	1.69829045	0.09154989	1.40165514	0.85981803	1.40165514
ENSG00000233327	USP32P2	0.00257444	0.0069481	-0.941628	0.31237123	1.10109131	1.24818919	0.10184482	0.99588277	0.95806734	0.99588277
ENSG00000197635	DPP4	0.00260265	0.00701249	-1.0812139	0.35907076	2.98755496	1.64880546	0.11321755	1.33726534	0.87375646	1.33726534
ENSG00000286132		0.00260712	0.00702337	-1.198006	0.39792628	1.75681112	2.02485647	0.30106531	1.48031961	0.97000718	1.48031961
ENSG00000179454	KLHL28	0.00261495	0.00703971	-0.8615899	0.28626978	2.79203677	0.79380165	0.02646605	0.63703403	0.89547583	0.89547583
ENSG00000185385	OR7A17	0.00261537	0.00703971	-0.9895879	0.32880352	1.73710298	1.38237059	0.2439821	0.9722751	0.97023466	0.9722751
ENSG00000161791	FMNL3	0.00261713	0.00704326	-1.1285485	0.37500036	4.04190518	1.79807177	0.03384972	1.54818461	0.9042541	1.54818461
ENSG00000183458	PKD1P3	0.00262024	0.00705044	-1.8609628	0.61844514	2.51844291	4.89026005	0.27634602	4.02649089	0.92905114	4.02649089
ENSG00000091536	MYO15A	0.0026207	0.0070505	-0.9136215	0.30362497	3.09196372	0.56716619	0.17184457	0.24319651	0.86527182	0.86527182
ENSG00000106012	IQCE	0.00262377	0.00705643	-0.9742156	0.32380069	5.61915082	0.55099397	0.11639725	0.26000471	1.06313024	1.06313024
ENSG00000275594	ADAM32	0.00262435	0.0070568	-1.0144764	0.33718966	1.8813473	1.29535878	0.31140387	0.80666668	0.96768588	0.96768588
ENSG00000163848	ZNF148	0.00262664	0.0070606	-1.0074135	0.33487157	4.57154359	1.4336966	0.02034209	1.24122132	0.97635289	1.24122132
ENSG00000162739	SLAMF6	0.00262995	0.00706715	-1.2044056	0.40040421	3.30289765	2.04966567	0.08655515	1.7170846	0.85735515	1.7170846
ENSG00000151150	ANK3	0.002655	0.00712614	-0.917094	0.30517994	4.48801708	0.60908708	0.08320085	0.37325084	0.96456562	0.96456562
ENSG00000151650	VENTX	0.00266225	0.00714323	-0.9974808	0.33202185	1.85505665	1.40888163	0.18725582	1.05292739	0.96830376	1.05292739
ENSG00000237515	SHISA9	0.00267207	0.00716598	-0.9397562	0.31292423	2.59287675	0.90545973	0.18127072	0.56850134	0.92034696	0.92034696
ENSG00000204176	SYT15	0.00267663	0.00717701	-0.9781387	0.32576125	1.96068498	1.3370739	0.22845162	0.94609774	0.96540279	0.96540279
ENSG00000137992	DBT	0.00271158	0.00725746	-0.8352984	0.27855606	3.55584309	0.94799283	0.01246355	0.81653969	0.86046307	0.86046307
ENSG00000197705	KLHL14	0.00271394	0.00726257	-1.3424537	0.44772221	1.43942675	2.56053478	0.1520489	2.10307187	0.96913954	2.10307187
ENSG00000144320	LNPK	0.00272017	0.0072768	-0.8920756	0.29758571	2.14202335	0.69736472	0.03846974	0.51656098	0.95779935	0.95779935
ENSG00000001631	KRIT1	0.00273327	0.00730459	-0.9786579	0.32662817	5.51428245	0.28586192	0.14083597	-0.03582	1.05938108	1.05938108
ENSG00000073711	PPP2R3A	0.00273326	0.00730459	-0.8817107	0.29427177	2.74755898	0.82884192	0.07319381	0.61914702	0.90100975	0.90100975
ENSG00000171649	ZIK1	0.00273957	0.00731683	-0.8740904	0.29179705	2.71980465	0.92093006	0.05338334	0.73522858	0.90450374	0.90450374
ENSG00000189164	ZNF527	0.00273967	0.00731683	-0.914566	0.30531007	2.32980475	0.61366636	0.10227148	0.35973658	0.9463887	0.9463887
ENSG00000122483	CCDC18	0.00275248	0.00734862	-0.9142032	0.30533407	3.84765091	0.81589946	0.17044326	0.49741335	0.87838181	0.87838181
ENSG00000008300	CELSR3	0.00276056	0.00736652	-1.0620081	0.35480526	2.42416777	1.60728065	0.15682273	1.25940348	0.93877218	1.25940348
ENSG00000226469	ADAM1B	0.00278559	0.00741612	-1.046157	0.34983164	1.39948495	1.56215031	0.2097932	1.16700627	0.96836155	1.16700627
ENSG00000226792	C13orf42	0.00280274	0.00745807	-1.2192152	0.40795748	2.01246091	2.12403538	0.2665416	1.60578813	0.96357176	1.60578813
ENSG00000169894	MUC3A	0.00280804	0.00746973	-1.3680049	0.45783207	3.43995609	2.6749886	0.22363722	2.13447757	0.85765574	2.13447757
ENSG00000197037	ZSCAN25	0.00281118	0.00747438	-0.8874756	0.29704666	3.88954618	1.12601875	0.02298485	0.96967824	0.88337642	0.96967824
ENSG00000019144	PHLDB1	0.00281241	0.0074764	-0.9840219	0.32937631	3.65252104	1.38444536	0.09118447	1.12931399	0.86419634	1.12931399
ENSG00000166106	ADAMTS15	0.00282358	0.00750362	-0.9961687	0.33357745	1.38343193	1.41983372	0.20845996	1.04337156	0.96800793	1.04337156
ENSG00000175455	CCDC14	0.00283886	0.0075405	-0.8509392	0.28510345	2.95321929	0.92056504	0.03732796	0.75865895	0.87711675	0.87711675
ENSG00000174891	RSRC1	0.00284191	0.00754736	-0.9809769	0.32870819	4.49243747	0.35073442	0.25033665	-0.0802111	0.96521544	0.96521544
ENSG00000115091	ACTR3	0.00289374	0.00767235	-0.9530749	0.31995194	5.36507509	0.7090337	0.0994206	0.44564891	1.0522334	1.0522334
ENSG00000099308	MAST3	0.00290469	0.00769887	-0.9465133	0.31787279	4.6475971	0.47767823	0.15109487	0.16104793	0.98564016	0.98564016
ENSG00000178971	CTC1	0.0029526	0.00781298	-1.0287749	0.34608233	4.48686318	1.52641732	0.02811725	1.3193288	0.96439566	1.3193288
ENSG00000261408	TEN1-CDK3	0.00297086	0.0078567	-0.9598338	0.32309619	3.10669587	1.3301633	0.26484608	0.90955433	0.864318	0.90955433
ENSG00000174106	LEMD3	0.00297154	0.0078567	-0.8571454	0.28853641	3.07051386	0.59413094	0.06982301	0.39204544	0.86677614	0.86677614
ENSG00000152689	RASGRP3	0.00297421	0.00786243	-0.9339865	0.31443217	2.88961623	1.25974276	0.0461452	1.06611518	0.8839295	1.06611518
ENSG00000145016	RUBCN	0.00297949	0.00787252	-0.8489954	0.28587188	4.01890523	0.96962511	0.01838207	0.82815169	0.90099863	0.90099863
ENSG00000141068	KSR1	0.00298567	0.00788496	-0.8849192	0.2980319	3.32127966	1.13163884	0.03701246	0.96224648	0.85717668	0.96224648
ENSG00000175262	C1orf127	0.00300267	0.00792597	-0.9727133	0.32779277	1.83600755	1.3460676	0.24008262	0.94566846	0.96870854	0.96870854
ENSG00000069431	ABCC9	0.00301215	0.0079484	-0.8913631	0.30047687	3.0527285	1.15000483	0.06331899	0.95240245	0.86812271	0.95240245
ENSG00000162461	SLC25A34	0.00302319	0.00797406	-0.9076067	0.30606856	0.72771369	0.6636608	0.11902966	0.3962945	0.93484745	0.93484745
ENSG00000131914	LIN28A	0.00302965	0.00798934	-0.9784223	0.33002258	1.87614044	1.38706292	0.16451408	1.06077855	0.96781371	1.06077855
ENSG00000072501	SMC1A	0.00304229	0.00801741	-1.0038918	0.33875977	4.57511192	1.46131271	0.01012734	1.28090223	0.97682598	1.28090223
ENSG00000114166	KAT2B	0.00304848	0.00803242	-0.8632228	0.2913531	2.88386571	0.3521077	0.07039668	0.14324773	0.8845779	0.8845779
ENSG00000125630	POLR1B	0.00306274	0.0080669	-0.8373441	0.28275569	3.01118294	0.78434036	0.02785201	0.63401347	0.87159425	0.87159425
ENSG00000136535	TBR1	0.00306375	0.00806737	-0.8676969	0.2930153	0.24068755	0.566297	0.07453263	0.35549187	0.8913695	0.8913695
ENSG00000147536	GINS4	0.00308697	0.00812056	-0.9324842	0.31514112	2.03261363	0.95352074	0.15449579	0.64680673	0.96278585	0.96278585
ENSG00000110436	SLC1A2	0.00309492	0.00813748	-0.9248893	0.31265807	3.2994769	1.24421457	0.18581125	0.91393327	0.85739644	0.91393327
ENSG00000113742	CPEB4	0.00309953	0.00814694	-0.8598944	0.29073166	4.21652595	1.07462667	0.02449789	0.92523516	0.92640724	0.92640724
ENSG00000019995	ZRANB1	0.00310448	0.00815862	-1.1729333	0.3966366	3.7067	2.00218858	0.06526755	1.7045891	0.86672156	1.7045891
ENSG00000132182	NUP210	0.00310702	0.0081623	-0.903228	0.30545968	5.02840107	1.01648235	0.0214866	0.8542802	1.02820158	1.02820158
ENSG00000196437	ZNF569	0.00311147	0.00817166	-0.8566539	0.2897522	3.06245358	1.06318901	0.07713326	0.86204385	0.86737554	0.86737554
ENSG00000174502	SLC26A9	0.00312399	0.00820188	-1.3131364	0.44433771	2.37740551	2.51229952	0.18464547	2.03650956	0.94284295	2.03650956
ENSG00000187847	OR7E25P	0.00313318	0.00822063	-0.9065423	0.30684889	2.1342902	1.1271116	0.10106587	0.88607415	0.95819184	0.95819184
ENSG00000048740	CELF2	0.00317259	0.00830943	-1.1391843	0.38609858	4.29476006	1.89608708	0.01252562	1.66453565	0.93625155	1.66453565
ENSG00000177888	ZBTB41	0.00317623	0.00831735	-0.9284202	0.31470305	4.29256851	1.25965079	0.0109656	1.103212	0.93595458	1.103212
ENSG00000175336	APOF	0.00321366	0.00840444	-0.9592309	0.32554648	1.2634683	1.23122436	0.22764716	0.84633289	0.96463361	0.96463361
ENSG00000275004	ZNF280B	0.00321663	0.00840947	-0.8609317	0.29221372	2.71885901	0.82398595	0.05600158	0.63842314	0.90462307	0.90462307
ENSG00000186329	TMEM212	0.00322946	0.00843618	-0.9161357	0.31108089	4.10959857	0.52469779	0.17508937	0.19585878	0.91358801	0.91358801
ENSG00000053254	FOXN3	0.00328267	0.0085613	-0.8612468	0.29294629	3.98569123	0.3254997	0.06914506	0.11809353	0.89630211	0.89630211
ENSG00000282184	IGHG3	0.00329113	0.0085778	-2.0477893	0.69672822	2.40386701	6.1681258	0.42401384	5.03707604	0.94060979	5.03707604
ENSG00000260062	GOLGA2P11	0.00329073	0.0085778	-0.9510366	0.32357111	1.13908387	1.27092776	0.21805075	0.89935346	0.95980473	0.95980473
ENSG00000112531	QKI	0.00329251	0.00858001	-0.8711928	0.29642281	3.96754939	1.11646391	0.02403147	0.96446646	0.89376269	0.96446646
ENSG00000268480	NFILZ	0.00330597	0.00861229	-1.1198178	0.38118127	2.78351627	1.84601879	0.13973572	1.49487981	0.8965271	1.49487981
ENSG00000236523	NPM1P40	0.00331492	0.00863242	-1.3432595	0.45737053	1.82194688	2.65752432	0.25320173	2.10016107	0.96898426	2.10016107
ENSG00000140807	NKD1	0.00333401	0.00867975	-0.9082961	0.30945621	0.88132294	1.18287465	0.13162736	0.91161978	0.945708	0.945708
ENSG00000131018	SYNE1	0.00334589	0.00870927	-0.9237748	0.31484821	6.35062544	0.35311225	0.05620094	0.13747705	1.05900477	1.05900477
ENSG00000137871	ZNF280D	0.00336862	0.00876419	-0.9125581	0.31124822	3.79922306	1.23016626	0.04130357	1.0485453	0.87335406	1.0485453
ENSG00000114982	KANSL3	0.00337483	0.00877892	-0.9165367	0.31266622	4.60805449	0.71201222	0.11876811	0.44258148	0.98103375	0.98103375
ENSG00000168116	KIAA1586	0.00341505	0.00887781	-0.8729076	0.29815711	2.90976335	1.12843836	0.1062772	0.89382152	0.88169738	0.89382152
ENSG00000184675	AMER1	0.00341652	0.00888018	-0.915188	0.31261296	3.32637103	1.24049879	0.05340603	1.04602116	0.85714001	1.04602116
ENSG00000179277	MEIS3P1	0.00341885	0.00888338	-1.3253113	0.45273707	2.22242755	2.60175507	0.12775472	2.17816744	0.95335611	2.17816744
ENSG00000213064	SFT2D2	0.0034262	0.00889962	-0.8169057	0.27912533	3.66668645	0.65720812	0.0116682	0.52743113	0.86483001	0.86483001
ENSG00000188153	COL4A5	0.00344769	0.00894967	-0.8396116	0.28707444	3.43829214	0.86113272	0.06950103	0.66974326	0.85763099	0.85763099
ENSG00000129566	TEP1	0.00346571	0.00899209	-0.9465864	0.32383021	5.17562809	0.93437501	0.13941848	0.63726832	1.04032406	1.04032406
ENSG00000082516	GEMIN5	0.0034679	0.00899634	-0.8706231	0.29786301	1.90592709	0.64225437	0.03108075	0.4752241	0.96704591	0.96704591
ENSG00000112365	ZBTB24	0.00351309	0.00909599	-0.9259779	0.3172391	4.25428914	1.27651126	0.0199781	1.11222915	0.93094971	1.11222915
ENSG00000138813	C4orf17	0.00355188	0.009192	-1.1062067	0.37943053	1.97628329	1.82551462	0.17171151	1.44792319	0.96487962	1.44792319
ENSG00000130045	NXNL2	0.00356785	0.00922888	-0.9893222	0.33950203	2.06726363	1.46134316	0.13704667	1.15964667	0.96133835	1.15964667
ENSG00000138180	CEP55	0.00357406	0.00924346	-0.8936728	0.30673553	1.31761142	0.92745205	0.09216006	0.69637177	0.96631519	0.96631519
ENSG00000072364	AFF4	0.00359706	0.00929845	-0.8230794	0.2827001	3.93637547	0.93548465	0.00960823	0.81060163	0.88948439	0.88948439
ENSG00000196935	SRGAP1	0.00361119	0.009332	-0.8645378	0.29706469	4.00693137	0.76690701	0.09348173	0.54167301	0.89930183	0.89930183
ENSG00000155100	OTUD6B	0.00361966	0.0093494	-0.9849623	0.33852908	3.69087201	1.45240614	0.03661345	1.25265837	0.8659562	1.25265837
ENSG00000186862	PDZD7	0.00363474	0.00938382	-0.9529752	0.32768153	2.60843421	1.36066318	0.18281223	1.02515859	0.91845066	1.02515859
ENSG00000163389	POGLUT1	0.00364446	0.00940591	-0.8534683	0.29355031	3.47635256	0.6652233	0.11111915	0.42428746	0.85831342	0.85831342
ENSG00000141646	SMAD4	0.00365123	0.00942035	-0.8843512	0.30423314	4.42857855	0.86861019	0.08557688	0.64631339	0.95569843	0.95569843
ENSG00000140718	FTO	0.0036602	0.00944048	-0.9204564	0.3167377	5.34586273	1.166066	0.07746566	0.94436958	1.05116549	1.05116549
ENSG00000178665	ZNF713	0.00367293	0.00946573	-0.8374769	0.28829143	3.32601858	1.05289715	0.0671872	0.86782223	0.85714238	0.86782223
ENSG00000198963	RORB	0.00368078	0.00948446	-1.013708	0.34903723	2.86691287	1.54326528	0.11381734	1.25673625	0.88651649	1.25673625
ENSG00000116747	RO60	0.00371886	0.0095688	-0.8996325	0.31010323	4.50746079	0.79079997	0.11443757	0.53301309	0.96740755	0.96740755
ENSG00000109265	CRACD	0.00372051	0.00957	-0.9152766	0.31551089	3.16349514	1.26066056	0.04230796	1.07759716	0.861267	1.07759716
ENSG00000213020	ZNF611	0.00372822	0.00958218	-0.8544773	0.29461827	3.55375729	1.09916832	0.04179834	0.93470084	0.86039518	0.93470084
ENSG00000285932		0.0037278	0.00958218	-0.9766709	0.33674573	1.69011587	1.3831794	0.30509963	0.91690668	0.97062435	0.97062435
ENSG00000079950	STX7	0.00373642	0.00960173	-0.9127892	0.31479858	4.02167386	1.25482816	0.04334267	1.07151149	0.90139106	1.07151149
ENSG00000166266	CUL5	0.00373914	0.00960717	-0.8352718	0.28808734	3.68352766	0.57163914	0.06807756	0.37809177	0.86560852	0.86560852
ENSG00000148219	ASTN2	0.00375004	0.00963365	-0.9254073	0.31927586	5.03034501	1.29064748	0.01709509	1.129697	1.02838946	1.129697
ENSG00000029363	BCLAF1	0.00376746	0.00967377	-0.9207555	0.31783031	6.32148529	0.25798889	0.07629744	0.02169738	1.06013375	1.06013375
ENSG00000205268	PDE7A	0.00379292	0.00973139	-0.8116368	0.2803688	3.60701587	0.79346205	0.02202202	0.65734479	0.86230293	0.86230293
ENSG00000072571	HMMR	0.00381513	0.00978058	-0.8991358	0.31079095	1.9974316	1.08380007	0.12251777	0.82315802	0.96413113	0.96413113
ENSG00000075651	PLD1	0.00382508	0.00980454	-0.8513122	0.29434375	3.76997201	0.5486759	0.10388924	0.31367347	0.87079097	0.87079097
ENSG00000128602	SMO	0.00383058	0.00981708	-0.8966421	0.31006511	1.47744219	0.78861111	0.11183514	0.53443082	0.96974401	0.96974401
ENSG00000107651	SEC23IP	0.00384076	0.00984004	-0.8191128	0.28333664	3.25560713	0.88665263	0.04498748	0.72681191	0.85815862	0.85815862
ENSG00000104415	CCN4	0.00386573	0.00989615	-1.0319057	0.35719485	1.20520883	1.61407809	0.09112076	1.34424608	0.96253753	1.34424608
ENSG00000172716	SLFN11	0.00386766	0.00989953	-0.8299439	0.28730128	2.68056869	0.90245595	0.0191409	0.76526985	0.90945688	0.90945688
ENSG00000198771	RCSD1	0.00386897	0.00990129	-1.1142725	0.38574134	3.90209688	1.8823335	0.03211416	1.64184516	0.88496662	1.64184516
ENSG00000164597	COG5	0.00387214	0.00990784	-0.8763532	0.30340499	3.14831127	0.5458006	0.17362368	0.23262275	0.86199042	0.86199042
ENSG00000174611	KY	0.00388948	0.00994423	-1.1183499	0.38737594	2.0114675	1.89804533	0.11042304	1.57775328	0.96360944	1.57775328
ENSG00000164466	SFXN1	0.00389848	0.00996258	-0.8141246	0.2820689	3.01160046	0.80392144	0.02352498	0.66569706	0.87155721	0.87155721
ENSG00000171365	CLCN5	0.00392093	0.01001008	-0.8310977	0.28812995	3.17812706	1.04983813	0.0417452	0.89221707	0.86062846	0.89221707
ENSG00000233013	FAM157B	0.00392142	0.01001008	-1.1367398	0.39409717	2.05701963	1.96404161	0.15126435	1.5960022	0.96177898	1.5960022
ENSG00000154134	ROBO3	0.00392111	0.01001008	-0.9716529	0.33686022	1.78184559	1.43497529	0.12644864	1.15014293	0.96966339	1.15014293
ENSG00000138756	BMP2K	0.00394469	0.01006446	-0.9599301	0.33301404	4.31687828	1.40216384	0.02516014	1.22244634	0.93930321	1.22244634
ENSG00000177200	CHD9	0.00394421	0.01006446	-0.8815675	0.30582487	4.36784601	0.59245623	0.10555938	0.34636912	0.94664021	0.94664021
ENSG00000261377	PDCD6IPP2	0.0039504	0.01007609	-0.9087223	0.31529921	1.20011503	1.14837898	0.15606264	0.85194384	0.96234029	0.96234029
ENSG00000198589	LRBA	0.00396739	0.01011622	-0.9206871	0.31960056	5.79241665	1.01314322	0.08226838	0.78392511	1.06685744	1.06685744
ENSG00000115760	BIRC6	0.00398269	0.0101488	-0.8015865	0.27837411	3.51899409	0.95547919	0.01243486	0.83488733	0.85935178	0.85935178
ENSG00000138092	CENPO	0.00399843	0.01018248	-0.8804151	0.30588181	2.77301738	0.719499	0.1547625	0.42679301	0.89782891	0.89782891
ENSG00000136603	SKIL	0.0040003	0.01018563	-0.8121466	0.28217777	3.63627869	0.84224983	0.03227846	0.69655674	0.86349483	0.86349483
ENSG00000161813	LARP4	0.00400461	0.01019337	-0.8031506	0.27908506	3.69820852	0.96358073	0.00993704	0.84513951	0.86630828	0.86630828
ENSG00000187664	HAPLN4	0.00400984	0.01020347	-0.9086077	0.31577532	1.32499999	0.99935361	0.15525854	0.70119359	0.96652453	0.96652453
ENSG00000286215		0.00403823	0.01026921	-0.8876241	0.3087216	2.77734281	1.02728939	0.17493479	0.71724562	0.89729177	0.89729177
ENSG00000093217	XYLB	0.00406022	0.01031081	-0.9064069	0.31544256	3.00060182	1.03571854	0.24687355	0.64734529	0.87254658	0.87254658
ENSG00000221944	TIGD1	0.00406138	0.01031181	-1.0397907	0.36187339	4.83684356	1.65439847	0.00954726	1.46366667	1.00736769	1.46366667
ENSG00000168769	TET2	0.00406383	0.01031641	-0.9620846	0.33485195	5.76205203	1.41652847	0.01396891	1.24744666	1.06643453	1.24744666
ENSG00000171940	ZNF217	0.00406457	0.01031668	-0.8166191	0.28422862	3.36435321	0.73043915	0.05180613	0.56187766	0.85703536	0.85703536
ENSG00000168813	ZNF507	0.0040656	0.01031766	-0.9400711	0.32720587	4.52334206	1.35256031	0.0200727	1.18439375	0.96969237	1.18439375
ENSG00000162676	GFI1	0.00408077	0.01035289	-0.8644282	0.30100047	1.65702776	1.03003628	0.04849397	0.85436353	0.97077045	0.97077045
ENSG00000273873	BDP1	0.00408776	0.01036736	-0.9157547	0.31893283	3.61199326	1.28483758	0.0786061	1.06572307	0.86249886	1.06572307
ENSG00000188107	EYS	0.00410926	0.01041369	-1.0293063	0.35868696	2.80240314	1.62486968	0.1361621	1.31122166	0.89420391	1.31122166
ENSG00000176896	TCEANC	0.00411446	0.01042361	-0.8794477	0.30650786	3.73479749	0.71152101	0.18864224	0.38512795	0.86826224	0.86826224
ENSG00000128881	TTBK2	0.0041316	0.01046209	-0.8156286	0.28439577	2.9041385	0.82205074	0.02759656	0.67959191	0.88231416	0.88231416
ENSG00000183137	CEP57L1	0.00414465	0.01049009	-0.8167421	0.28488316	3.12199192	0.90481788	0.04963319	0.74139687	0.863399	0.863399
ENSG00000142065	ZFP14	0.00414813	0.01049571	-0.8312384	0.28996639	3.78936836	1.0616237	0.03439157	0.91151411	0.87244717	0.91151411
ENSG00000198342	ZNF442	0.00416645	0.01053543	-0.8518711	0.29730846	2.5281151	0.9867928	0.06645176	0.79659696	0.92796185	0.92796185
ENSG00000130827	PLXNA3	0.00417077	0.0105428	-0.8658066	0.30220665	2.15819513	0.58648107	0.07049088	0.3807013	0.9569588	0.9569588
ENSG00000106479	ZNF862	0.00417132	0.0105428	-0.8542939	0.29819257	2.25625275	0.76260936	0.04904763	0.58515064	0.95128898	0.95128898
ENSG00000153162	BMP6	0.00417855	0.01055941	-1.2853104	0.44872543	1.21939348	2.54184873	0.11083112	2.15440711	0.96307497	2.15440711
ENSG00000273274	ZBTB8B	0.00421608	0.01064256	-0.8293711	0.28983533	3.05896294	1.06019209	0.06355079	0.88150004	0.86764073	0.88150004
ENSG00000101298	SNPH	0.00421848	0.01064695	-0.9265016	0.32379934	2.53441437	1.32320477	0.10396234	1.07555529	0.92724485	1.07555529
ENSG00000277297	ATP5F1AP10	0.00422191	0.01065228	-1.0791867	0.37719466	1.62974812	1.79554595	0.28337452	1.31722833	0.97081166	1.31722833
ENSG00000133816	MICAL2	0.00427643	0.01077129	-0.8581681	0.3003721	3.1362885	0.94501403	0.15240521	0.66605577	0.86260802	0.86260802
ENSG00000158691	ZSCAN12	0.00428256	0.01078166	-0.8179199	0.28633013	3.79828838	0.7976374	0.04906441	0.6325638	0.87326623	0.87326623
ENSG00000171634	BPTF	0.0042819	0.01078166	-0.8822959	0.30886107	5.14475358	0.2637279	0.03509157	0.08219167	1.03810398	1.03810398
ENSG00000145388	METTL14	0.00429801	0.0108138	-0.8126052	0.28458349	3.20573515	0.80814315	0.05153625	0.64245971	0.85957611	0.85957611
ENSG00000167232	ZNF91	0.00431586	0.01085362	-0.8507883	0.29809308	4.01091015	1.1207461	0.02526904	0.97440014	0.89986548	0.97440014
ENSG00000234042		0.00432898	0.01088154	-1.0306504	0.36123399	1.60235474	1.64567668	0.25777832	1.2102341	0.97078139	1.2102341
ENSG00000111432	FZD10	0.00433583	0.01089535	-0.9824357	0.34439578	1.62267285	1.49576757	0.23891992	1.09542514	0.97081071	1.09542514
ENSG00000151576	QTRT2	0.00435563	0.01094339	-0.81339	0.28528112	2.79774583	0.73847731	0.02081048	0.60207097	0.89477433	0.89477433
ENSG00000155629	PIK3AP1	0.00436195	0.01095757	-1.1230469	0.39395113	4.71447007	1.95686861	0.04661245	1.69935931	0.99314237	1.69935931
ENSG00000067048	DDX3Y	0.00437315	0.01097714	-1.8752512	0.65800342	1.934547	5.45887	0.03047347	4.8404222	0.96622463	4.8404222
ENSG00000213096	ZNF254	0.0043832	0.01099522	-0.9509113	0.33374909	4.43137756	1.40429796	0.02538944	1.22773067	0.95611871	1.22773067
ENSG00000144645	OSBPL10	0.00438515	0.01099593	-0.79404	0.27870453	3.42258027	0.86106653	0.01643641	0.73718092	0.85742101	0.85742101
ENSG00000163393	SLC22A15	0.00440071	0.01102914	-0.8561248	0.30061489	2.14248962	0.93156684	0.05887931	0.74658206	0.95777548	0.95777548
ENSG00000138823	MTTP	0.00440401	0.0110357	-0.8776449	0.30819716	1.13665379	0.98584441	0.10888954	0.74454821	0.95969723	0.95969723
ENSG00000114739	ACVR2B	0.00441368	0.01105135	-0.8218873	0.28868792	3.39377219	0.76898961	0.08043223	0.57079234	0.85715082	0.85715082
ENSG00000139354	GAS2L3	0.00443788	0.01110504	-1.1060468	0.38873666	2.4077115	1.90450652	0.21878554	1.48127162	0.94026979	1.48127162
ENSG00000120693	SMAD9	0.00444139	0.01111209	-0.8605139	0.30246723	2.04626269	0.86479093	0.0669921	0.66908063	0.9622302	0.9622302
ENSG00000085719	CPNE3	0.00446325	0.01116159	-0.8209524	0.28872028	4.12960473	0.65395073	0.02158568	0.5129145	0.9162076	0.9162076
ENSG00000110422	HIPK3	0.00448742	0.01121854	-0.935315	0.32913961	6.13897796	1.36489601	0.01103181	1.20771312	1.06542175	1.20771312
ENSG00000153933	DGKE	0.00454314	0.01135081	-0.8329805	0.29353457	2.57516758	0.69726829	0.04685066	0.52785527	0.92247795	0.92247795
ENSG00000283589	GOLGA8N	0.00456366	0.01139677	-1.2188055	0.42971356	2.73153631	2.32539487	0.29796251	1.77939215	0.90302455	1.77939215
ENSG00000189212	DPY19L2P1	0.00456322	0.01139677	-1.1579073	0.40823832	2.66911798	2.09878164	0.11544412	1.75946429	0.9108992	1.75946429
ENSG00000047648	ARHGAP6	0.00457981	0.01143357	-0.9250953	0.32629015	2.74486293	1.34061608	0.14305095	1.05468327	0.90134821	1.05468327
ENSG00000109680	TBC1D19	0.00463702	0.01156206	-0.8229534	0.29067052	2.63994642	0.92445864	0.03595132	0.77308267	0.91455391	0.91455391
ENSG00000165244	ZNF367	0.00464845	0.01158876	-0.8831045	0.31200291	2.35490317	0.90712089	0.15055427	0.62093805	0.94458619	0.94458619
ENSG00000166747	AP1G1	0.00465349	0.01159953	-0.8390351	0.29646938	4.28316742	0.66112255	0.05411584	0.48185755	0.9346927	0.9346927
ENSG00000133226	SRRM1	0.00465622	0.01160455	-0.8821414	0.31172153	4.59226816	0.73465485	0.11411105	0.48227144	0.97905495	0.97905495
ENSG00000163013	FBXO41	0.00467399	0.01164704	-0.9017451	0.31878617	3.90633331	0.6636839	0.25776516	0.25963962	0.88551182	0.88551182
ENSG00000188917	TRMT2B	0.00467836	0.01165612	-0.8847542	0.31281259	4.65020625	0.71672989	0.11490611	0.46234691	0.98592572	0.98592572
ENSG00000139193	CD27	0.00468988	0.01168301	-0.9953695	0.35201957	3.50839338	1.55936282	0.09957482	1.2945002	0.85906794	1.2945002
ENSG00000257950	P2RX5-TAX1BP3	0.00469595	0.01169451	-0.8463681	0.29936799	3.21396188	1.07237053	0.14893826	0.80297637	0.85930016	0.85930016
ENSG00000113555	PCDH12	0.00469769	0.01169704	-0.8251466	0.29187399	0.36103835	0.49808704	0.05611805	0.31849201	0.90227427	0.90227427
ENSG00000186908	ZDHHC17	0.00471886	0.01174249	-0.8080277	0.28596429	2.84181419	0.89238149	0.03052087	0.75060473	0.88945435	0.88945435
ENSG00000187066	TMEM262	0.00473292	0.01176841	-0.8172163	0.28931386	0.14689955	0.38763371	0.06676254	0.19801608	0.87489067	0.87489067
ENSG00000163635	ATXN7	0.00475477	0.01181361	-0.9198537	0.32582014	4.38130079	1.33538248	0.01537697	1.17890914	0.94862833	1.17890914
ENSG00000185920	PTCH1	0.00476786	0.01183883	-0.847461	0.30027178	2.83367666	0.87033636	0.12391285	0.62212517	0.89042247	0.89042247
ENSG00000128512	DOCK4	0.0047727	0.01184903	-0.9890269	0.35047171	4.22198292	1.54493741	0.02413399	1.35770821	0.92703625	1.35770821
ENSG00000124343	XG	0.00478641	0.01187392	-0.8657289	0.30687988	0.88418899	1.08928326	0.11357792	0.84911155	0.94589376	0.94589376
ENSG00000196247	ZNF107	0.00479495	0.01189328	-0.8282161	0.29364204	4.26683702	0.86664049	0.0374885	0.71104499	0.93255003	0.93255003
ENSG00000133083	DCLK1	0.0047966	0.01189553	-1.0756676	0.38139025	3.17595601	1.82929866	0.27950119	1.3569072	0.86071962	1.3569072
ENSG00000197312	DDI2	0.00489278	0.01211542	-0.7871175	0.27971391	3.69811091	0.69103208	0.01389499	0.56887932	0.86630356	0.86630356
ENSG00000170049	KCNAB3	0.00491066	0.01215782	-0.8737207	0.31061907	1.81403031	1.01793924	0.1163164	0.77110259	0.9691309	0.9691309
ENSG00000050438	SLC4A8	0.00493404	0.01220633	-0.9166438	0.32605586	3.76375209	1.33595776	0.04386908	1.15214566	0.87029781	1.15214566
ENSG00000285269		0.00493888	0.01221644	-1.3112781	0.4664821	2.19157614	2.73443115	0.45885917	1.9892033	0.95513924	1.9892033
ENSG00000151090	THRB	0.00495053	0.01223773	-0.9457517	0.33653825	4.40008618	0.66412708	0.32272587	0.17935995	0.95142652	0.95142652
ENSG00000243943	ZNF512	0.00495226	0.01223932	-0.8929509	0.31776224	5.08417179	0.98192399	0.10263387	0.74155925	1.03331061	1.03331061
ENSG00000231256	CFAP97D1	0.00498809	0.01231925	-0.9923175	0.35341435	1.29422512	1.56908764	0.22297641	1.18216779	0.96562061	1.18216779
ENSG00000281106	TMEM272	0.00505367	0.01247021	-1.0660112	0.38023045	2.33790263	1.81558622	0.24868062	1.3777903	0.94581524	1.3777903
ENSG00000172867	KRT2	0.00505386	0.01247021	-0.893759	0.31879197	1.4719469	1.27625484	0.12055093	1.02276767	0.96966489	1.02276767
ENSG00000117724	CENPF	0.00505726	0.01247357	-0.8614989	0.30730904	2.14437438	0.69672083	0.10475819	0.46001766	0.95767881	0.95767881
ENSG00000106178	CCL24	0.00509373	0.0125513	-1.0759777	0.38413431	1.8376204	1.85265758	0.26670156	1.39333906	0.96867566	1.39333906
ENSG00000173805	HAP1	0.00510952	0.01258636	-1.1603517	0.41440444	2.25254273	2.15596074	0.24541084	1.68656334	0.95152144	1.68656334
ENSG00000289692		0.00510947	0.01258636	-1.2976239	0.46342888	1.77345072	2.69623881	0.52258332	1.89353784	0.96978553	1.89353784
ENSG00000164118	CEP44	0.00512248	0.01261635	-0.8756337	0.31281247	3.97139435	1.22837221	0.01891533	1.08191566	0.89429848	1.08191566
ENSG00000138944	SHISAL1	0.00518695	0.01275954	-1.0825727	0.38729869	1.57522453	1.882369	0.21569331	1.47180981	0.970681	1.47180981
ENSG00000005339	CREBBP	0.00521711	0.01282589	-0.8167485	0.29239413	3.48398053	0.64986633	0.10333257	0.4283482	0.8584786	0.8584786
ENSG00000270276	H4C15	0.00524676	0.01289484	-1.1258168	0.40330457	4.65769271	2.04052669	0.0509794	1.77888459	0.98674866	1.77888459
ENSG00000184402	SS18L1	0.00526401	0.01292542	-0.8600041	0.30819907	2.89843976	0.51789401	0.18565584	0.19770911	0.88294417	0.88294417
ENSG00000169045	HNRNPH1	0.00526288	0.01292542	-0.9157813	0.32817972	6.08028041	0.31286555	0.14518386	0.0104057	1.0664628	1.0664628
ENSG00000100815	TRIP11	0.00528995	0.01297923	-0.7955039	0.28524691	3.59181422	1.02051663	0.0186141	0.89675114	0.86172256	0.89675114
ENSG00000176293	ZNF135	0.00530136	0.01300325	-0.8544078	0.30644493	3.73644437	0.97779253	0.18810454	0.6649492	0.86836606	0.86836606
ENSG00000163611	SPICE1	0.00530383	0.01300734	-0.8452739	0.30318538	2.20994748	0.8642758	0.08002628	0.66056481	0.95408917	0.95408917
ENSG00000263956	NBPF11	0.00533011	0.01306781	-0.8985887	0.32249375	4.16513067	1.30415918	0.11989881	1.05012617	0.92061645	1.05012617
ENSG00000151917	BEND6	0.00537651	0.01317155	-1.0159801	0.3649924	1.48225095	1.67013759	0.1011004	1.39761846	0.96981096	1.39761846
ENSG00000286019	NOTCH2NLB	0.00543076	0.013275	-0.8892424	0.31983605	3.72040272	1.24079337	0.28340042	0.82540733	0.86741945	0.86741945
ENSG00000169962	TAS1R3	0.00544057	0.01329615	-0.9953105	0.35806138	1.85967945	1.60678686	0.14405681	1.29828267	0.96820009	1.29828267
ENSG00000166004	CEP295	0.00545584	0.01332608	-0.8233599	0.29629943	3.82184383	0.58647323	0.11208476	0.35300666	0.87559042	0.87559042
ENSG00000102383	ZDHHC15	0.00547209	0.01336102	-1.0197714	0.36710897	4.2315986	1.68874623	0.12712901	1.38902224	0.92816798	1.38902224
ENSG00000213886	UBD	0.00547504	0.01336619	-1.8385558	0.66190601	2.32046709	5.48985171	0.70202451	4.22682065	0.9470416	4.22682065
ENSG00000164663	USP49	0.00549744	0.01341479	-0.7851464	0.28279893	3.20729566	0.91433675	0.04019892	0.77033126	0.85952246	0.85952246
ENSG00000174306	ZHX3	0.00550733	0.0134369	-0.869932	0.31340351	2.5221935	0.6960023	0.17636432	0.38484847	0.92863045	0.92863045
ENSG00000138468	SENP7	0.00553441	0.01349888	-0.8492793	0.30613905	4.4434591	1.00219595	0.09643066	0.783142	0.95793191	0.95793191
ENSG00000234857	HNRNPUL2-BSCL2	0.00554666	0.01352466	-2.224472	0.8020617	3.71210742	8.05802182	0.4438086	6.79334979	0.86698789	6.79334979
ENSG00000254709	IGLL5	0.00555688	0.01354751	-1.8737373	0.67574567	2.21471591	5.71949236	0.12447656	5.01263588	0.95381097	5.01263588
ENSG00000149531	FRG1BP	0.00555959	0.01355208	-0.8837215	0.31872411	2.18028925	1.27237444	0.15028159	0.99255031	0.95576723	0.99255031
ENSG00000259848		0.00556442	0.01356135	-1.0316733	0.37212244	1.60655313	1.73438887	0.24213726	1.31570772	0.97079067	1.31570772
ENSG00000171561	OR2AT4	0.00558111	0.01359269	-0.9182928	0.33134291	3.90168812	1.37497366	0.0401065	1.19500992	0.88491424	1.19500992
ENSG00000113595	TRIM23	0.00559437	0.01361831	-0.8117091	0.29296648	2.39989908	0.64938926	0.02462362	0.50816363	0.94095667	0.94095667
ENSG00000164048	ZNF589	0.00561056	0.01364948	-0.8382023	0.30263139	3.53753719	0.44690405	0.17045244	0.14787995	0.85988735	0.85988735
ENSG00000134744	TUT4	0.00562753	0.01368456	-0.8346872	0.30146934	4.39073703	0.64110833	0.07241116	0.44461445	0.95003119	0.95003119
ENSG00000186272	ZNF17	0.00565975	0.0137484	-0.8308367	0.30028046	2.07638292	0.66043486	0.05345687	0.48447243	0.96093713	0.96093713
ENSG00000286098		0.00567222	0.01377662	-1.1149351	0.4030637	1.65075952	2.03372934	0.42700204	1.40067687	0.97078624	1.40067687
ENSG00000136052	SLC41A2	0.00568257	0.01379966	-0.8325625	0.30104694	2.28304259	0.78444903	0.07001073	0.59351409	0.94956847	0.94956847
ENSG00000278704		0.00573866	0.01392749	-1.1189164	0.40505934	1.70451523	2.05326073	0.19049864	1.65532337	0.97052771	1.65532337
ENSG00000166387	PPFIBP2	0.00575037	0.01395171	-0.845257	0.30606555	4.2934835	0.67988948	0.11777792	0.43525332	0.93607844	0.93607844
ENSG00000175106	TVP23C	0.00577364	0.01400605	-0.7969654	0.28871713	3.67091167	1.02449834	0.07275	0.84621416	0.86502282	0.86502282
ENSG00000140471	LINS1	0.00580139	0.01406669	-0.7738037	0.28048555	3.31985452	0.90799348	0.02787369	0.77963369	0.85718793	0.85718793
ENSG00000258679		0.00580213	0.01406669	-0.8624681	0.31262899	1.67261069	1.1006184	0.12882515	0.84648795	0.9707148	0.9707148
ENSG00000103494	RPGRIP1L	0.00582485	0.01411965	-0.9136044	0.33131841	5.11786641	0.43540945	0.19885243	0.08216629	1.03608131	1.03608131
ENSG00000162924	REL	0.00584386	0.01416361	-0.8457191	0.30681836	5.01162294	1.17747767	0.00629154	1.05275543	1.02655343	1.05275543
ENSG00000119314	PTBP3	0.00584963	0.01417546	-0.9468365	0.34354295	5.93908032	0.98429814	0.26010681	0.56727205	1.06763796	1.06763796
ENSG00000081818	PCDHB4	0.00586946	0.01421709	-0.9727473	0.35308605	1.88619953	1.55918962	0.16293756	1.23959725	0.96756432	1.23959725
ENSG00000123200	ZC3H13	0.00588572	0.01424847	-0.8855342	0.32153525	5.397551	0.31808031	0.10911671	0.06234565	1.05396363	1.05396363
ENSG00000136738	STAM	0.00589947	0.01427048	-0.7851372	0.28516045	2.83065433	0.72855111	0.02402662	0.59751752	0.89078383	0.89078383
ENSG00000105369	CD79A	0.00589876	0.01427048	-1.6765004	0.60889329	2.75389775	4.63618487	0.19865795	3.97229125	0.90021506	3.97229125
ENSG00000112984	KIF20A	0.00592371	0.01432481	-0.8407739	0.30551658	2.05812265	1.10277461	0.08834726	0.89632632	0.96173204	0.96173204
ENSG00000281614	INPP5D	0.00593305	0.01434311	-0.7990339	0.29040375	2.81601873	1.05441996	0.02012787	0.92863347	0.89254653	0.92863347
ENSG00000168918	INPP5D	0.00593305	0.01434311	-0.7990339	0.29040375	2.81601873	1.05441996	0.02012787	0.92863347	0.89254653	0.92863347
ENSG00000048471	SNX29	0.00594482	0.01436724	-0.7680353	0.27920337	3.28139968	0.85941893	0.01933071	0.74048975	0.85765763	0.85765763
ENSG00000284906		0.00600252	0.01449365	-0.8411496	0.30613487	1.80581943	0.83657772	0.08505737	0.62870718	0.96927645	0.96927645
ENSG00000175216	CKAP5	0.006004	0.01449506	-0.7674711	0.27932797	3.32511654	0.92310031	0.02062275	0.80414508	0.85714854	0.85714854
ENSG00000236418	HLA-DQA1	0.00600781	0.01450207	-1.1073461	0.40305898	3.43398549	2.03047149	0.02537059	1.80226555	0.85756915	1.80226555
ENSG00000147905	ZCCHC7	0.00601773	0.01452309	-0.7978833	0.29047595	3.70684245	1.05453339	0.01718328	0.93204983	0.86672854	0.93204983
ENSG00000106258	CYP3A5	0.00605101	0.01458233	-1.0060855	0.3665151	4.24153808	1.67864121	0.016661	1.49458884	0.92936791	1.49458884
ENSG00000116544	DLGAP3	0.00608057	0.01464044	-1.007107	0.36710118	2.16181631	1.68378842	0.12143916	1.39464774	0.95676693	1.39464774
ENSG00000224769	MUC20P1	0.00609586	0.01467505	-1.6197604	0.59059736	2.33116797	4.35781675	0.13923122	3.78482773	0.94629264	3.78482773
ENSG00000132740	IGHMBP2	0.00610884	0.0147041	-0.7820066	0.28520804	3.80472708	0.65260132	0.04123698	0.5039995	0.87387883	0.87387883
ENSG00000101596	SMCHD1	0.00613354	0.01476136	-0.9060796	0.33061895	6.02913576	0.62511722	0.16261912	0.31403414	1.0671059	1.0671059
ENSG00000092871	RFFL	0.00614238	0.01477822	-0.846999	0.30911444	3.86216548	1.19353118	0.02588779	1.04906925	0.88005243	1.04906925
ENSG00000089177	KIF16B	0.0061588	0.0148133	-0.9155734	0.33424792	4.3405275	1.39540649	0.03893208	1.21793675	0.94266245	1.21793675
ENSG00000211751	TRBC1	0.00617851	0.01485626	-1.869433	0.68273472	2.52143423	5.82142271	0.20997541	5.0339499	0.92871579	5.0339499
ENSG00000122012	SV2C	0.00618789	0.01487661	-0.9560256	0.34921329	1.50178604	1.52296027	0.21759152	1.15434514	0.97006086	1.15434514
ENSG00000008869	HEATR5B	0.00622467	0.01495832	-0.7861242	0.28735701	3.38199252	0.5566035	0.07187342	0.37445769	0.85708465	0.85708465
ENSG00000110066	KMT5B	0.00623837	0.01498678	-0.8690087	0.31773835	5.42185342	0.84906694	0.08057773	0.63665017	1.05519594	1.05519594
ENSG00000075213	SEMA3A	0.00626747	0.01504069	-0.8029388	0.29374564	2.56019583	0.74819706	0.04646989	0.58957545	0.92425322	0.92425322
ENSG00000172986	GXYLT2	0.00630431	0.01511365	-0.8443368	0.30910888	2.20222201	0.72285941	0.12038339	0.47666021	0.95453495	0.95453495
ENSG00000185739	SRL	0.00630352	0.01511365	-1.065988	0.39024877	1.77955415	1.90094271	0.16084971	1.55245896	0.96969742	1.55245896
ENSG00000198929	NOS1AP	0.00633513	0.01516949	-0.8342741	0.30560482	2.88294821	0.88829994	0.16600417	0.60260871	0.8846818	0.8846818
ENSG00000275746	KLF13	0.00633911	0.01517451	-1.866764	0.6838704	2.7699077	5.83668562	0.39866517	4.8627204	0.89821574	4.8627204
ENSG00000197479	PCDHB11	0.00637201	0.01524195	-0.8344502	0.30588383	2.26679633	0.99339642	0.10198471	0.77347964	0.95062064	0.95062064
ENSG00000082482	KCNK2	0.00641353	0.01533669	-0.9012838	0.33064266	1.38025793	1.36394567	0.13658228	1.09331909	0.96793525	1.09331909
ENSG00000144057	ST6GAL2	0.00641689	0.01534247	-0.9791463	0.35922995	1.62063913	1.60997122	0.13056115	1.3212081	0.97080954	1.3212081
ENSG00000205755	CRLF2	0.00643777	0.01538326	-1.0085728	0.37017163	1.74202272	1.70938735	0.17967829	1.36187582	0.97018143	1.36187582
ENSG00000152926	ZNF117	0.00645414	0.01541358	-0.8014757	0.2942523	3.8622897	1.08004945	0.05666218	0.91741248	0.88006702	0.91741248
ENSG00000138658	ZGRF1	0.00645629	0.01541608	-0.8279034	0.30396724	3.72331211	1.15253332	0.11666015	0.9227958	0.8675803	0.9227958
ENSG00000228163	HLA-DPA1	0.00646582	0.01542969	-1.568762	0.57607875	3.98155656	4.13948221	0.08561176	3.64788891	0.89572101	3.64788891
ENSG00000138688	KIAA1109	0.00647488	0.01544674	-0.9050553	0.33240969	6.21424724	0.3583717	0.17946696	0.02620155	1.06361533	1.06361533
ENSG00000089682	RBM41	0.00647687	0.01544919	-0.7628235	0.28018108	3.38397409	0.97731964	0.02604726	0.85525424	0.85709394	0.85709394
ENSG00000214960	CRPPA	0.00648298	0.01546147	-0.8348219	0.3066608	2.47298119	0.99662138	0.12399958	0.754625	0.93395994	0.93395994
ENSG00000144815	NXPE3	0.00650344	0.01550568	-0.7731263	0.28410642	3.27221336	1.00664213	0.02010619	0.88795394	0.85781852	0.88795394
ENSG00000164684	ZNF704	0.00653076	0.01555931	-0.8276403	0.30429407	1.22617042	0.67109459	0.07836681	0.47143424	0.96332561	0.96332561
ENSG00000162408	NOL9	0.00652943	0.01555931	-0.7932215	0.29163224	2.41953232	0.59409285	0.01760451	0.46468816	0.93920084	0.93920084
ENSG00000142661	MYOM3	0.00654246	0.01558259	-1.0033566	0.36897907	2.53736087	1.69763773	0.27471669	1.25692083	0.9269075	1.25692083
ENSG00000174840	PDE12	0.00656599	0.01563399	-0.8730817	0.32121139	4.90585243	0.74267424	0.1454671	0.46215746	1.01527144	1.01527144
ENSG00000148158	SNX30	0.00656994	0.0156411	-0.8255441	0.30374436	3.81239768	1.15029152	0.03493021	1.00300194	0.87463125	1.00300194
ENSG00000206538	VGLL3	0.00659141	0.01568206	-0.9145733	0.33663478	2.69757437	1.41276676	0.17178523	1.10309821	0.9073107	1.10309821
ENSG00000121281	ADCY7	0.00659301	0.01568212	-0.8506052	0.31309876	3.67754171	1.22211568	0.04217073	1.06067618	0.86532877	1.06067618
ENSG00000135333	EPHA7	0.00664085	0.01578072	-0.8340119	0.30726169	3.08525416	1.17673877	0.05266812	1.00944153	0.86572791	1.00944153
ENSG00000275851	MLLT6	0.00666674	0.01583646	-0.8304078	0.30607926	4.95122965	0.7913925	0.03367705	0.63760598	1.0202737	1.0202737
ENSG00000184635	ZNF93	0.00671562	0.01594551	-0.8018756	0.29582666	2.43505504	0.78323641	0.04678077	0.62523901	0.93774513	0.93774513
ENSG00000052795	FNIP2	0.0067719	0.01606731	-0.8029654	0.29653158	3.65757871	0.37660635	0.12480318	0.13323645	0.8644203	0.8644203
ENSG00000275723	NAPEPLD	0.00681825	0.016163	-0.8131422	0.30054116	3.07743632	0.63853554	0.14988009	0.37141465	0.86627604	0.86627604
ENSG00000231345	BEND3P1	0.0068195	0.01616359	-0.8707572	0.3218432	1.4562126	1.18861825	0.1958864	0.8661571	0.96942288	0.96942288
ENSG00000237004	ZNRF2P1	0.00683882	0.01620699	-0.887012	0.32796508	2.29409306	1.31458719	0.26122501	0.92341728	0.94883732	0.94883732
ENSG00000180764	PIPSL	0.00684238	0.01621175	-0.8278596	0.30611355	2.63974563	0.93883943	0.13960804	0.68248372	0.91457893	0.91457893
ENSG00000156475	PPP2R2B	0.00689942	0.0163194	-0.8229741	0.30461786	2.07749762	0.8699695	0.08302296	0.67057583	0.96088751	0.96088751
ENSG00000116731	PRDM2	0.00690115	0.0163211	-0.757439	0.2803692	3.70464226	0.81139829	0.01770667	0.69640053	0.86662085	0.86662085
ENSG00000141956	PRDM15	0.00690936	0.01633814	-0.8913419	0.32998223	4.2712037	1.35572223	0.07227889	1.15271414	0.93311655	1.15271414
ENSG00000274305	LENG8	0.00693351	0.01638322	-1.4973514	0.55457031	2.06192471	3.8287865	0.20880509	3.25111242	0.96156932	3.25111242
ENSG00000197299	BLM	0.00696356	0.01643975	-0.9150263	0.33907673	3.7540031	1.43117329	0.21036816	1.0830784	0.86956367	1.0830784
ENSG00000198947	DMD	0.00696259	0.01643975	-0.8951166	0.33169314	5.54743686	1.36952798	0.06167096	1.17605787	1.0606836	1.17605787
ENSG00000171766	GATM	0.00696886	0.01644986	-0.833259	0.3088056	3.48053824	1.1870185	0.03420768	1.03860241	0.85840292	1.03860241
ENSG00000250151	ARPC4-TTLL3	0.0070052	0.01652595	-1.05059	0.38959846	2.05081838	1.88911968	0.38208438	1.32551894	0.96204053	1.32551894
ENSG00000126091	ST3GAL3	0.00700718	0.01652821	-0.8262083	0.30639992	4.44524001	0.82643311	0.09796131	0.61031589	0.95819896	0.95819896
ENSG00000119906	SLF2	0.00706571	0.0166565	-0.849261	0.31527308	4.36910391	1.23679013	0.01762792	1.10058965	0.94682538	1.10058965
ENSG00000196277	GRM7	0.0070703	0.01666489	-1.0355959	0.38447751	4.53393904	1.83931594	0.32355437	1.33945387	0.97119506	1.33945387
ENSG00000104728	ARHGEF10	0.00707534	0.01667435	-0.8033591	0.29828313	2.56823394	1.09154579	0.07764101	0.90754193	0.9233033	0.9233033
ENSG00000125508	SRMS	0.00708465	0.01669383	-0.8413542	0.31244134	2.58010813	1.21458304	0.10415429	0.99406611	0.92188665	0.99406611
ENSG00000178921	PFAS	0.00711814	0.01676793	-0.7935999	0.29487977	2.45409371	1.04849546	0.04234971	0.90206362	0.93588367	0.93588367
ENSG00000164211	STARD4	0.00714194	0.01681162	-0.7877966	0.29284461	2.5667563	0.91696207	0.04129865	0.77109355	0.92347849	0.92347849
ENSG00000160352	ZNF714	0.00714144	0.01681162	-0.7975619	0.29647202	3.37477919	0.63227311	0.13176899	0.38802295	0.85705719	0.85705719
ENSG00000112297	CRYBG1	0.00720414	0.01693839	-0.8136981	0.3027987	4.43560767	0.33653443	0.07472559	0.13918569	0.95675379	0.95675379
ENSG00000135917	SLC19A3	0.00720313	0.01693839	-0.985339	0.36666448	3.08811892	1.6719746	0.18878784	1.32369415	0.86553154	1.32369415
ENSG00000163104	SMARCAD1	0.0072042	0.01693839	-0.8663226	0.32238203	4.30267345	1.29250387	0.01658691	1.15262752	0.93733225	1.15262752
ENSG00000138758	SEPTIN11	0.00722936	0.01698516	-0.7574375	0.28198516	3.30819104	0.98223554	0.03725455	0.85063583	0.85729629	0.85729629
ENSG00000125618	PAX8	0.00723705	0.01700073	-0.8823469	0.32853089	2.87515512	1.34211046	0.12944575	1.0847954	0.88556906	1.0847954
ENSG00000079819	EPB41L2	0.00726141	0.01704307	-0.8990838	0.33490275	4.14727508	1.3945468	0.05255164	1.20924673	0.91844365	1.20924673
ENSG00000256087	ZNF432	0.00728322	0.01708679	-0.7708147	0.28723061	3.18532414	0.62431836	0.06780592	0.45203092	0.86033512	0.86033512
ENSG00000175395	ZNF25	0.00729278	0.01710673	-0.7638478	0.28468108	3.36710447	0.97875572	0.05469825	0.82776078	0.85703905	0.85703905
ENSG00000281490	CICP14	0.00734267	0.01720621	-0.9448888	0.35245342	3.39678919	1.54406687	0.04696123	1.35055219	0.85717197	1.35055219
ENSG00000169375	SIN3A	0.00737609	0.01728201	-0.7863859	0.29349659	3.68378476	0.56188735	0.10345718	0.34816907	0.86562061	0.86562061
ENSG00000095574	IKZF5	0.00740717	0.01733972	-0.7881491	0.29430936	2.73566482	0.50641696	0.07194777	0.32271322	0.9025047	0.9025047
ENSG00000058453	CROCC	0.00741347	0.01735193	-0.8299904	0.30996659	5.23074895	0.92350512	0.03679343	0.76901444	1.04409851	1.04409851
ENSG00000145246	ATP10D	0.00742488	0.01737358	-0.7880977	0.29437804	2.39425708	0.71870085	0.03346461	0.57715605	0.94144274	0.94144274
ENSG00000206561	COLQ	0.00745369	0.01743594	-0.9048568	0.33815498	3.12915888	1.42074068	0.10277802	1.18364587	0.86299414	1.18364587
ENSG00000084710	EFR3B	0.00745612	0.01743909	-0.8176421	0.30557437	2.43345198	0.91662189	0.11257849	0.6901738	0.93789811	0.93789811
ENSG00000073464	CLCN4	0.00752393	0.01758299	-0.8541565	0.31958336	3.10367407	1.26864297	0.05277485	1.09622728	0.86450823	1.09622728
ENSG00000170923	OR7G2	0.00752513	0.01758299	-0.9356115	0.35006687	1.74872283	1.52219823	0.17673383	1.20191782	0.97010513	1.20191782
ENSG00000116830	TTF2	0.00752695	0.01758328	-0.7733922	0.28937992	2.95172973	0.86140608	0.06481533	0.6954249	0.87726798	0.87726798
ENSG00000129534	MIS18BP1	0.00754417	0.01761946	-0.7590361	0.28408981	3.5188604	0.99198273	0.04860587	0.84872953	0.8593481	0.8593481
ENSG00000165650	PDZD8	0.00754769	0.01762513	-0.746306	0.27934162	3.12243123	0.83553466	0.01448338	0.72742355	0.8633737	0.8633737
ENSG00000166451	CENPN	0.00755642	0.01764295	-0.7763476	0.29062834	3.0687605	1.01329419	0.08332438	0.83053434	0.86690497	0.86690497
ENSG00000102313	ITIH6	0.00755807	0.01764427	-0.9375687	0.35099165	1.66975205	1.53006733	0.12803549	1.25790983	0.97072676	1.25790983
ENSG00000221947	XKR9	0.00760057	0.01773064	-0.9899662	0.37086877	1.6352862	1.70801018	0.15366187	1.39370413	0.97080907	1.39370413
ENSG00000115155	OTOF	0.00760585	0.01773665	-1.5522423	0.58156378	2.97086263	4.19987465	0.12498494	3.67994993	0.87535926	3.67994993
ENSG00000173809	TDRD12	0.00760644	0.01773665	-1.105213	0.4140836	2.09123316	2.12920149	0.13487766	1.79410612	0.96026567	1.79410612
ENSG00000116962	NID1	0.00761924	0.01776389	-0.9344015	0.35016073	2.32382811	1.52249361	0.24668637	1.13270465	0.94680763	1.13270465
ENSG00000107864	CPEB3	0.00762179	0.01776728	-0.8534779	0.31984866	4.37205677	0.68220072	0.20364991	0.34902367	0.94726067	0.94726067
ENSG00000242948	EPS15P1	0.00762976	0.01778327	-0.8279327	0.31031619	1.14263802	1.11411563	0.12337046	0.87699601	0.95996106	0.95996106
ENSG00000113140	SPARC	0.00765025	0.01782846	-0.908943	0.34079466	1.30488502	1.44197452	0.10026164	1.20632458	0.96594323	1.20632458
ENSG00000215641	TRIM27	0.00771655	0.01796738	-1.1220966	0.42117159	1.99845635	2.20184626	0.2507873	1.74479968	0.96409371	1.74479968
ENSG00000138439	FAM117B	0.00772349	0.01797834	-0.7730971	0.29020987	3.74848767	1.04539989	0.01928157	0.9282133	0.8691699	0.9282133
ENSG00000172244	C5orf34	0.00776146	0.01805889	-0.8440751	0.31705038	1.81343275	0.98357928	0.1617189	0.70062543	0.96914171	0.96914171
ENSG00000206291	HLA-DPA1	0.0077665	0.0180654	-1.5357713	0.57691174	3.98320159	4.13057448	0.08929459	3.6550109	0.89595207	3.6550109
ENSG00000095015	MAP3K1	0.00778305	0.01809263	-0.8212903	0.30860036	5.61202659	1.04917877	0.00847432	0.92796056	1.06291022	1.06291022
ENSG00000179930	ZNF648	0.00785849	0.01824778	-0.9277453	0.34902706	1.59634852	1.51136411	0.16615857	1.2043152	0.97076519	1.2043152
ENSG00000124772	CPNE5	0.00787184	0.01827497	-1.3255502	0.49879258	3.01170235	3.08653047	0.07593231	2.72300064	0.87154818	2.72300064
ENSG00000277149	TYW1B	0.00792162	0.01837583	-0.7868456	0.29631991	2.50042449	1.02377037	0.0567714	0.86456108	0.93104038	0.93104038
ENSG00000151458	ANKRD50	0.0079362	0.018407	-0.8753382	0.32972251	4.27187155	1.34843628	0.011541	1.21152452	0.93320362	1.21152452
ENSG00000185305	ARL15	0.00794217	0.01841819	-0.8201323	0.30895709	2.47619641	0.71225935	0.14023765	0.45383752	0.93362525	0.93362525
ENSG00000172519	OR10H5	0.0079507	0.01843532	-0.8392083	0.31618645	2.49254844	1.23993208	0.082864	1.04184202	0.93189247	1.04184202
ENSG00000012048	BRCA1	0.00795279	0.01843752	-0.7841182	0.2954402	4.23357377	0.86815148	0.05355121	0.71031036	0.92840404	0.92840404
ENSG00000145734	BDP1	0.00795868	0.01844852	-0.7633893	0.28765701	3.76032787	1.02624093	0.03445683	0.89644194	0.87003449	0.89644194
ENSG00000131095	GFAP	0.00800519	0.01854566	-0.8826556	0.33284511	2.85082588	1.37377013	0.22751055	1.01883044	0.88839082	1.01883044
ENSG00000129595	EPB41L4A	0.00803112	0.01859771	-0.7487103	0.2824513	3.43824556	0.71175844	0.03988047	0.57541899	0.8576303	0.8576303
ENSG00000113248	PCDHB15	0.00806395	0.01866591	-0.9141197	0.34503153	1.17787148	1.47590972	0.14468995	1.19458603	0.96145294	1.19458603
ENSG00000078814	MYH7B	0.00808235	0.01870022	-0.8231162	0.31077287	1.75478646	0.81320635	0.11649018	0.57932139	0.9700323	0.9700323
ENSG00000139055	ERP27	0.0080866	0.01870737	-0.8485887	0.32041168	1.53408683	1.05553296	0.18456998	0.74948672	0.970396	0.970396
ENSG00000205045	SLFN12L	0.00812976	0.01880006	-0.8437827	0.31881369	4.59128727	1.25985035	0.07013925	1.07333517	0.97892964	1.07333517
ENSG00000150672	DLG2	0.00813412	0.0188065	-0.7710227	0.29134211	2.76394285	0.97449459	0.05594333	0.82004503	0.89895918	0.89895918
ENSG00000273772	SMN2	0.00823212	0.01901125	-1.4724831	0.5572525	2.77436274	3.84768438	0.3838124	3.10965406	0.89766172	3.10965406
ENSG00000188994	ZNF292	0.00826259	0.01906523	-0.9399003	0.35586823	4.50350167	1.56902416	0.0255832	1.39914153	0.96683252	1.39914153
ENSG00000160654	CD3G	0.00826545	0.0190691	-0.8726601	0.33042418	3.29745472	1.35266642	0.08422433	1.14405226	0.85742206	1.14405226
ENSG00000120334	CENPL	0.00830455	0.01915383	-0.7668004	0.29051737	2.95805556	0.84910629	0.07287512	0.67682255	0.87662875	0.87662875
ENSG00000282540	WHAMMP2	0.00835226	0.01925284	-0.8288386	0.314253	2.07684467	1.0275312	0.1500766	0.76192151	0.96091659	0.96091659
ENSG00000163508	EOMES	0.00835968	0.01926694	-1.0069408	0.38182386	2.67504943	1.80566667	0.10971426	1.5304172	0.91015247	1.5304172
ENSG00000023516	AKAP11	0.00844841	0.01946056	-0.8544707	0.32444926	5.42097534	1.07987388	0.129105	0.82776925	1.05515236	1.05515236
ENSG00000169495	HTRA4	0.00849909	0.0195745	-1.039418	0.39497988	1.93646836	1.93136142	0.20273541	1.552367	0.96616655	1.552367
ENSG00000125885	MCM8	0.00851966	0.01961627	-0.779925	0.29646482	3.92287477	1.08800534	0.02131835	0.96745979	0.8876776	0.96745979
ENSG00000196367	TRRAP	0.00853799	0.01965063	-0.8995316	0.34202464	6.19846016	0.29552842	0.25199662	-0.1083215	1.06403796	1.06403796
ENSG00000130508	PXDN	0.00854341	0.01965691	-0.8368476	0.3182167	1.72501861	1.25342205	0.06155385	1.07764217	0.97035539	1.07764217
ENSG00000276565		0.0085532	0.01967382	-1.0451177	0.39747159	1.47171346	1.95546426	0.14132179	1.63599446	0.96966146	1.63599446
ENSG00000100697	DICER1	0.00858778	0.0197449	-0.8906672	0.33890896	5.55583302	1.20319661	0.23117048	0.83890038	1.06099643	1.06099643
ENSG00000118482	PHF3	0.0085921	0.01975201	-0.8307806	0.31614202	5.06136909	0.96013751	0.0930949	0.7497224	1.03129509	1.03129509
ENSG00000114861	FOXP1	0.00861372	0.01978955	-0.8418578	0.32046158	5.79478463	0.37724747	0.08843951	0.1578441	1.0668863	1.0668863
ENSG00000048405	ZNF800	0.00862161	0.0198029	-0.7934411	0.30206709	4.12346288	0.60197307	0.11108832	0.37915283	0.9154126	0.9154126
ENSG00000150636	CCDC102B	0.00865388	0.01987419	-0.8103955	0.30867112	1.33607364	0.78499457	0.10504676	0.56609713	0.96682917	0.96682917
ENSG00000206557	TRIM71	0.00865827	0.01988144	-0.9157146	0.34880902	1.71492778	1.50545246	0.1616082	1.20715381	0.9704453	1.20715381
ENSG00000064393	HIPK2	0.00866401	0.01989179	-0.9024391	0.34378176	4.89189922	1.46234332	0.00327991	1.32631142	1.0136966	1.32631142
ENSG00000119772	DNMT3A	0.00867158	0.01990352	-0.8662217	0.33002224	4.27800221	0.28876959	0.29128213	-0.1430738	0.93400801	0.93400801
ENSG00000084093	REST	0.00871176	0.01999289	-0.9934743	0.37873147	5.59327741	1.77451924	0.0073616	1.60631056	1.06230674	1.60631056
ENSG00000153046	CDYL	0.00875714	0.02008557	-0.7868582	0.30016801	4.77074774	0.91763547	0.0139765	0.79938733	0.99965787	0.99965787
ENSG00000242715	CCDC169	0.00877947	0.02012534	-0.7979844	0.30451329	1.73121096	0.90588738	0.07289854	0.72509438	0.9702953	0.9702953
ENSG00000177873	ZNF619	0.00877925	0.02012534	-0.7376916	0.28150446	3.18629632	0.95173574	0.03120701	0.83138408	0.86029653	0.86029653
ENSG00000282657	IGHM	0.0088484	0.02026604	-1.6728303	0.63900759	2.19363283	5.04944649	0.2260572	4.36766314	0.9550234	4.36766314
ENSG00000168137	SETD5	0.0088738	0.02031269	-0.8404466	0.32116384	6.43112562	0.22811063	0.1049115	-0.0098756	1.05548341	1.05548341
ENSG00000113262	GRM6	0.00889457	0.02035181	-1.1943422	0.45653885	2.87175959	2.57706246	0.36992759	1.97488423	0.88595827	1.97488423
ENSG00000143643	TTC13	0.00891043	0.02037916	-0.7730472	0.29556703	2.21482234	0.65863722	0.02899379	0.52508506	0.95380473	0.95380473
ENSG00000064195	DLX3	0.00892148	0.02039864	-0.8302216	0.31747846	1.82345662	1.24612568	0.13987899	0.99403742	0.96895559	0.99403742
ENSG00000169247	SH3TC2	0.00894652	0.02045009	-0.7891755	0.30189288	2.68861551	1.12630067	0.1168755	0.90804281	0.90844177	0.90844177
ENSG00000188263	IL17REL	0.00899219	0.02054576	-1.0120826	0.38742219	2.67707949	1.85527303	0.07897586	1.60960357	0.9098967	1.60960357
ENSG00000136573	BLK	0.00904179	0.0206503	-1.2982079	0.49730814	3.01691244	3.05649848	0.18288795	2.5994102	0.87108971	2.5994102
ENSG00000127511	SIN3B	0.00905689	0.02068184	-0.761385	0.29172964	3.94640061	0.61186225	0.06659887	0.44336954	0.8908457	0.8908457
ENSG00000213516	RBMXL1	0.0090633	0.02069354	-0.8200542	0.31423829	4.85525799	0.74618557	0.10138837	0.5272228	1.0095008	1.0095008
ENSG00000171467	ZNF318	0.00909853	0.02075634	-0.8348609	0.3200749	4.19849777	0.30230977	0.22813837	-0.0558089	0.92440094	0.92440094
ENSG00000152503	TRIM36	0.00909668	0.02075634	-0.7899933	0.30286515	1.67529935	0.84222479	0.06122926	0.67446484	0.97070283	0.97070283
ENSG00000138660	AP1AR	0.00909475	0.02075634	-0.760326	0.29148332	3.10085989	1.04985801	0.03977265	0.91605574	0.86468792	0.91605574
ENSG00000085382	HACE1	0.00912567	0.02080942	-0.7771643	0.29807131	3.4580833	1.09774863	0.06278725	0.93673594	0.85795586	0.93673594
ENSG00000206289	RXRB	0.00912916	0.0208134	-0.877338	0.33650853	2.16944962	1.33986706	0.31756935	0.89609933	0.95635807	0.95635807
ENSG00000142149	HUNK	0.00913847	0.02082971	-0.7765258	0.29788126	2.04027933	0.900406	0.03577288	0.76319764	0.96247611	0.96247611
ENSG00000176289	IDSP1	0.00922322	0.02099324	-1.0303325	0.39572354	1.67276095	1.93427891	0.26361646	1.49810118	0.97071415	1.49810118
ENSG00000274229	SOCS7	0.00926425	0.02108069	-1.053655	0.40491779	2.3590585	2.02495747	0.38113387	1.46339829	0.94427557	1.46339829
ENSG00000148082	SHC3	0.00929692	0.0211401	-0.9983781	0.38385309	2.07417298	1.81957583	0.21327247	1.4443385	0.96103514	1.4443385
ENSG00000168803	ADAL	0.0093099	0.02116662	-0.776586	0.29863413	3.71825665	0.74390583	0.13599742	0.50375651	0.86730394	0.86730394
ENSG00000123360	PDE1B	0.00933381	0.02121798	-0.885888	0.34078127	3.17676308	1.43398336	0.17616011	1.13032344	0.86068559	1.13032344
ENSG00000165246	NLGN4Y	0.0093366	0.02122134	-1.5313951	0.58911665	2.63911363	4.28540329	0.12341504	3.78099223	0.91465768	3.78099223
ENSG00000075407	ZNF37A	0.00933958	0.02122513	-0.8189149	0.31504398	4.67196212	0.27390223	0.12826128	0.02028592	0.98833169	0.98833169
ENSG00000103479	RBL2	0.00934358	0.02123121	-0.7845447	0.30183846	3.87687918	1.12493992	0.00635956	1.01858809	0.88181238	1.01858809
ENSG00000179912	R3HDM2	0.00937401	0.02128643	-0.9104976	0.35044694	4.9551417	1.51630229	0.01237637	1.3692705	1.02069491	1.3692705
ENSG00000251247	ZNF345	0.00938609	0.02130978	-0.7882879	0.30346055	2.37705763	0.87630684	0.09312239	0.67776344	0.94287102	0.94287102
ENSG00000143951	WDPCP	0.0094124	0.0213665	-0.776667	0.29909766	4.46789097	0.93663049	0.04483367	0.79094336	0.9615847	0.9615847
ENSG00000253183		0.00947028	0.02147672	-0.9333898	0.35974412	1.4241099	1.59737319	0.21733949	1.23858865	0.96885843	1.23858865
ENSG00000197381	ADARB1	0.00950253	0.02154167	-0.8787495	0.33883746	4.03579942	1.41697155	0.07772996	1.21389184	0.90339139	1.21389184
ENSG00000132436	FIGNL1	0.00950438	0.02154191	-0.7723492	0.29781819	3.55311658	1.09465786	0.05002693	0.9477994	0.86037444	0.9477994
ENSG00000150893	FREM2	0.00950691	0.02154421	-0.8838167	0.34081214	3.41690046	1.43351713	0.04591097	1.2608093	0.85735582	1.2608093
ENSG00000153827	TRIP12	0.00951356	0.0215506	-0.796172	0.30704359	4.97231032	1.08101544	0.0380808	0.93862006	1.02252158	1.02252158
ENSG00000111181	SLC6A12	0.0095374	0.02159854	-0.8377474	0.32318445	1.6853138	1.21800418	0.20438999	0.89848524	0.97065211	0.97065211
ENSG00000156265	MAP3K7CL	0.00960907	0.0217346	-0.8382974	0.32371836	3.80420453	1.29294342	0.2013155	0.97761224	0.87382846	0.97761224
ENSG00000250312	ZNF718	0.00961527	0.02174227	-0.7783154	0.30058141	3.52123459	1.11470867	0.05652652	0.95990183	0.85941387	0.95990183
ENSG00000186231	KLHL32	0.00961571	0.02174227	-0.8140837	0.31439684	3.73652069	1.21953124	0.19613015	0.91588029	0.86837091	0.91588029
ENSG00000104369	JPH1	0.00962721	0.02176522	-0.8138396	0.31435254	1.71615156	1.21914746	0.09028598	1.02141114	0.97043493	1.02141114
ENSG00000188559	RALGAPA2	0.00962964	0.02176767	-0.8138352	0.31436139	5.3456736	0.38953107	0.06060487	0.20717352	1.05115482	1.05115482
ENSG00000196873	CBWD3	0.00964559	0.0217976	-0.8458854	0.32681343	4.84179725	0.95019328	0.19363621	0.6341531	1.00794272	1.00794272
ENSG00000139350	NEDD1	0.00970235	0.02191664	-0.7483936	0.2893728	2.55783505	0.66826644	0.01750622	0.55364334	0.92453074	0.92453074
ENSG00000116117	PARD3B	0.00972043	0.02195134	-0.8175167	0.31617835	3.94158383	1.23302311	0.0555526	1.06909586	0.8901897	1.06909586
ENSG00000282895	RINL	0.00979381	0.02209674	-0.7960299	0.30817735	2.17810341	0.48632124	0.11256203	0.25923517	0.95588734	0.95588734
ENSG00000186462	NAP1L2	0.00979442	0.02209674	-1.0161392	0.39339434	1.4368289	1.90841323	0.18540081	1.55563916	0.96909338	1.55563916
ENSG00000187994	RINL	0.00979381	0.02209674	-0.7960299	0.30817735	2.17810341	0.48632124	0.11256203	0.25923517	0.95588734	0.95588734
ENSG00000109943	CRTAM	0.00991053	0.02233056	-0.8902917	0.34521676	2.19795407	1.46912543	0.16866971	1.17204464	0.9547786	1.17204464
ENSG00000272674	PCDHB16	0.00992267	0.02235479	-0.7967007	0.30897686	2.16710669	1.06017222	0.1175162	0.83781871	0.9564842	0.9564842
ENSG00000125249	RAP2A	0.00994117	0.02239021	-0.7651981	0.29683359	3.89411713	1.08608616	0.02218995	0.96904957	0.8839511	0.96904957
ENSG00000203761	MSTO2P	0.00996266	0.02243548	-1.0652751	0.41335833	1.46720159	2.10603576	0.24828033	1.67395219	0.96959431	1.67395219
ENSG00000188171	ZNF626	0.00997216	0.02245374	-0.7292899	0.28302229	3.18185347	0.86358118	0.0406683	0.73463898	0.86047488	0.86047488
ENSG00000163939	PBRM1	0.01002246	0.0225607	-0.8021045	0.31149043	5.54234356	1.05625403	0.0310553	0.9186181	1.06049046	1.06049046
ENSG00000163681	SLMAP	0.01003631	0.0225887	-0.8515289	0.33074531	5.84339915	0.28065183	0.16330441	-0.0184584	1.06736074	1.06736074
ENSG00000100030	MAPK1	0.01011036	0.02273631	-0.8034454	0.31237768	4.81838576	0.77377584	0.09255374	0.56935358	1.00521918	1.00521918
ENSG00000152078	TLCD4	0.01017488	0.02286865	-0.7944877	0.30915977	1.96931676	1.01503199	0.11015601	0.79994343	0.96511631	0.96511631
ENSG00000163577	EIF5A2	0.01018157	0.02288048	-0.7939112	0.30896283	1.62521868	0.63619754	0.10309122	0.42181974	0.9708116	0.9708116
ENSG00000239920		0.01020849	0.02293778	-0.9064314	0.35287743	2.8649123	1.53379862	0.0961214	1.3047565	0.88674781	1.3047565
ENSG00000258653		0.01021285	0.02294118	-1.2231017	0.4761859	1.36502555	2.79298454	0.39267398	2.15829739	0.96757377	2.15829739
ENSG00000135144	DTX1	0.0102212	0.02295675	-1.1618591	0.4523925	2.42204575	2.52078887	0.16226795	2.14014551	0.93896906	2.14014551
ENSG00000117593	DARS2	0.01026875	0.02305068	-0.8354692	0.32551015	4.43462051	0.70921466	0.23540903	0.35064382	0.9566056	0.9566056
ENSG00000177853	ZNF518A	0.01028302	0.02307951	-0.8409421	0.32770398	4.223374	1.03579534	0.28093818	0.63554646	0.92719815	0.92719815
ENSG00000214439	FAM185BP	0.01030458	0.02312469	-0.9279884	0.36172719	2.33503546	1.61127896	0.2206064	1.25141741	0.94601905	1.25141741
ENSG00000145725	PPIP5K2	0.01033405	0.02318435	-0.7320828	0.28547399	3.90177373	0.82497607	0.03189804	0.70334685	0.88492521	0.88492521
ENSG00000151136	BTBD11	0.01036361	0.02324419	-0.7653311	0.29855452	3.61464293	0.79982856	0.14016217	0.55984478	0.86260432	0.86260432
ENSG00000183682	BMP8A	0.01039157	0.02330043	-0.7580634	0.29582735	2.84354655	1.04266621	0.09528133	0.85389764	0.88924918	0.88924918
ENSG00000083168	KAT6A	0.0104096	0.02333112	-0.7837167	0.3059102	5.1928295	1.05921915	0.01125856	0.94708706	1.04152823	1.04152823
ENSG00000157193	LRP8	0.01041728	0.02334507	-0.8136088	0.31760979	4.84704013	0.83442463	0.12630435	0.59410963	1.00855041	1.00855041
ENSG00000011590	ZBTB32	0.01044902	0.02340607	-1.0352087	0.40428291	2.06368125	2.01192863	0.20261392	1.6361386	0.96149365	1.6361386
ENSG00000267228		0.01048426	0.02347234	-1.2413848	0.48502312	1.22179806	2.89551867	0.59324381	2.05328969	0.96316436	2.05328969
ENSG00000158352	SHROOM4	0.01049326	0.02348923	-0.8829622	0.34502352	3.44813641	1.46517203	0.16122011	1.17799369	0.85778431	1.17799369
ENSG00000118263	KLF7	0.01053632	0.02356597	-0.7647561	0.29900005	2.29664869	0.82709139	0.05709517	0.6708153	0.94866644	0.94866644
ENSG00000254004	ZNF260	0.01054144	0.02357415	-0.8662006	0.33868461	4.48696143	1.41165089	0.02888299	1.26157371	0.96441014	1.26157371
ENSG00000157064	NMNAT2	0.01059033	0.02367033	-0.9535387	0.3730686	2.23307141	1.71260973	0.28685343	1.27892364	0.9527183	1.27892364
ENSG00000196172	ZNF681	0.01064618	0.02378199	-0.7681024	0.30073276	1.43696509	0.57595382	0.04835635	0.4230917	0.96909581	0.96909581
ENSG00000065559	MAP2K4	0.01065436	0.02379696	-0.7537427	0.29514146	4.01397273	0.7468901	0.07967093	0.56989934	0.90029949	0.90029949
ENSG00000151422	FER	0.01070049	0.02388674	-0.7575011	0.29678801	3.86280032	0.89864481	0.1108081	0.69203162	0.88012703	0.88012703
ENSG00000054267	ARID4B	0.01070593	0.02389226	-0.8771955	0.34370793	5.78938735	0.31864474	0.26220062	-0.087313	1.06681973	1.06681973
ENSG00000125257	ABCC4	0.01073684	0.02395102	-0.8370937	0.32812415	3.87874356	1.32431997	0.03911056	1.17212587	0.88203985	1.17212587
ENSG00000287977		0.01079229	0.02405502	-0.8743652	0.3429753	2.64724795	1.44670687	0.16533413	1.15802651	0.91364255	1.15802651
ENSG00000163374	YY1AP1	0.01081008	0.02409134	-0.8579362	0.33660677	6.18859084	0.29275727	0.21038094	-0.0553453	1.06429039	1.06429039
ENSG00000131019	ULBP3	0.0108193	0.02410521	-0.7569094	0.29700408	3.09793446	0.71871251	0.12750122	0.49247774	0.86487729	0.86487729
ENSG00000165929	TC2N	0.01082632	0.0241142	-0.8472988	0.33250154	4.60884209	1.35957912	0.10111985	1.14264949	0.98113053	1.14264949
ENSG00000163535	SGO2	0.01084907	0.02416151	-0.7680687	0.30149626	1.74978364	0.67650363	0.05253231	0.52120919	0.97009265	0.97009265
ENSG00000014824	SLC30A9	0.010857	0.02417583	-0.7700005	0.30228483	4.32243293	0.69698839	0.08789735	0.50610577	0.94008399	0.94008399
ENSG00000164463	CREBRF	0.01091134	0.02428341	-0.8173116	0.32107772	4.14107706	1.267488	0.00824073	1.1515319	0.91766844	1.1515319
ENSG00000172062	SMN1	0.01093897	0.02433147	-1.0351806	0.4068079	1.99341819	2.03456706	0.32284404	1.53894851	0.96427664	1.53894851
[truncated: 397 more rows]
